# Supplementary material for: Metal-free C3–H acylation of quinoxalin-2(1H)-ones with α-oxo-carboxylic acids
Source: Royal Society of Chemistry journal article supplement (doi:10.1039/d0ob01423k), 2020-01-01

## Supporting Information

### Metal-free C3-H acylation of quinoxalin-2(1*H*)-ones with $\alpha$ - oxo-carboxylic acids

Hangcheng Ni,\* Xingzi Shi, Yu Li, Xiaoning Zhang, Jingwei Zhao\* and  
Fei Zhao\*

Jinhua Branch, Sichuan Industrial Institute of Antibiotics, Chengdu University, 888  
West Hai Tang Road, Jinhua321007, China. E-mail: nihc@hotmail.com; E-mail:  
zhaojingwei\_siia@126.com

|                                                                                    |     |
|------------------------------------------------------------------------------------|-----|
| 1. General Procedure.....                                                          | S2  |
| 2. General procedure for the synthesis of starting materials ( <b>1b-1g</b> ) .... | S2  |
| 3. General procedure for the synthesis of starting materials ( <b>1h-1i</b> ) .... | S3  |
| 4. General procedure for the synthesis of starting materials ( <b>2b-2k</b> ) .... | S4  |
| 5. General procedure for the synthesis of product ( <b>3a-3t</b> ) .....           | S6  |
| 6. Radical trapping experiment.....                                                | S11 |
| 7. Synthesis of potential antitumor agent.....                                     | S12 |
| 8. References.....                                                                 | S13 |
| 9. Spectra of starting materials and products.....                                 | S15 |

## 1 General Procedure.

$^1\text{H}$  NMR spectra were recorded on a Bruker DPX600 spectrometer at 600 MHz or a Bruker DPX500 spectrometer at 500 MHz.  $^{13}\text{C}$  NMR spectra were recorded on a Bruker DPX600 spectrometer at 600 MHz or a Bruker DPX500 spectrometer at 151 MHz or 125 MHz. All chemical shifts were reported in  $\delta$  units with references to the residual solvent resonances of the deuterated solvents for proton and carbon chemical shifts. HRMS spectra were obtained on a Thermo Q Exactive spectrometer. Melting points (MP) were determined by SGW X-4A. Compounds **1b-1i** and **2b-2k** were prepared using literature methods.<sup>1,5,7</sup> All other chemicals were purchased from Chemical Co. and used as received unless otherwise specified.

## 2 General procedure for the synthesis of starting materials (1b-1g).<sup>1</sup>

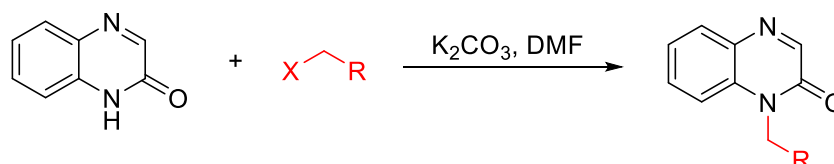

A typical procedure: To a stirred solution of quinoxalin-2(1H)-ones (3 mmol) in DMF (10 mL) was added the corresponding halide (1.6 equiv.) and potassium carbonate (1.2 equiv.) at room temperature overnight. Then the resulting mixture was added with water, and extracted with ethyl acetate for three times. The combined organic layers were dried over Na<sub>2</sub>SO<sub>4</sub>, filtered and evaporated under reduced pressure. The residue was purified by column chromatography on silica gel to obtain the desired product **1b** to **1g**.

### 1-Methylquinoxalin-2(1H)-one (**1b**):

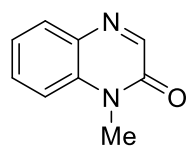

White solid. Yield: 73%.  $^1\text{H}$  NMR (600 MHz, DMSO-*d*<sub>6</sub>):  $\delta$  8.24 (s, 1H), 7.83 (d,  $J = 8.0$  Hz, 1H), 7.67 (t,  $J = 7.5$  Hz, 1H), 7.59 (d,  $J = 8.3$  Hz, 1H), 7.39 (t,  $J = 7.5$  Hz, 1H) (aromatic  $H$ ), 3.61 (s, 3H) (CH<sub>3</sub>).  $^{13}\text{C}$  NMR (151 MHz, DMSO-*d*<sub>6</sub>):  $\delta$  154.31 (CO), 150.04, 133.11, 132.63, 131.05, 129.53, 123.42, 114.84 (aromatic C), 28.54 (CH<sub>3</sub>). This is a known structure. These data are similar to the reported one.<sup>2</sup>

### 1-Benzylquinoxalin-2(1H)-one (**1c**):

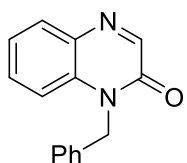

White solid. Yield: 68%.  $^1\text{H}$  NMR (600 MHz, DMSO-*d*<sub>6</sub>):  $\delta$  8.36 (s, 1H), 7.86 (d,  $J = 7.9$  Hz, 1H), 7.56 (t,  $J = 7.8$  Hz, 1H), 7.46 (d,  $J = 8.4$  Hz, 1H), 7.36 (t,  $J = 7.6$  Hz, 1H), 7.32 (t,  $J = 7.5$  Hz, 2H), 7.28 – 7.24 (m, 3H) (aromatic  $H$ ), 5.49 (s, 2H) (CH<sub>2</sub>).  $^{13}\text{C}$  NMR (151 MHz, DMSO-*d*<sub>6</sub>):  $\delta$  154.51 (CO), 150.35, 135.69, 132.98, 132.24, 131.04, 129.84, 128.71, 127.37, 126.80, 123.63, 115.21 (aromatic C), 44.45 (CH<sub>2</sub>). This is a known structure. These data are similar to the reported one.<sup>2</sup>

### 1-Allylquinoxalin-2(1H)-one (1d):

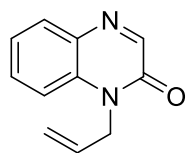

White solid. Yield: 66%.  $^1\text{H}$  NMR (600 MHz, DMSO- $d_6$ ):  $\delta$  8.28 (s, 1H), 7.85 (dd,  $J = 7.9, 1.2$  Hz, 1H), 7.66 – 7.61 (m, 1H), 7.51 (d,  $J = 8.4$  Hz, 1H), 7.41 – 7.36 (m, 1H) (aromatic  $H$ ), 5.98 – 5.90 (m, 1H), 5.17 (dd,  $J = 10.5, 1.5$  Hz, 1H), 5.05 (dd,  $J = 17.3, 1.5$  Hz, 1H) (olefinic  $H$ ), 4.90 – 4.84 (m, 2H) ( $\text{CH}_2$ ).  $^{13}\text{C}$  NMR (151 MHz, DMSO- $d_6$ ):  $\delta$  153.96 (CO), 150.20, 132.85, 132.20, 131.43, 131.01, 129.75, 123.52 (aromatic  $C$ ), 117.11, 115.20 (olefinic  $C$ ), 43.36 ( $\text{CH}_2$ ). This is a known structure. These data are similar to the reported one.<sup>2</sup>

### 1-(2-Propynyl)quinoxalin-2(1H)-one (1e):

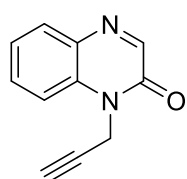

Yellow solid. Yield: 79%. MP: 162.2-163.8 °C.  $^1\text{H}$  NMR (600 MHz, DMSO- $d_6$ ):  $\delta$  8.29 (s, 1H), 7.87 (d,  $J = 7.9$  Hz, 1H), 7.72 (t,  $J = 7.8$  Hz, 1H), 7.65 (d,  $J = 8.4$  Hz, 1H), 7.43 (t,  $J = 7.6$  Hz, 1H) (aromatic  $H$ ), 5.07 (d,  $J = 2.5$  Hz, 2H) ( $\text{CH}_2$ ), 3.36 (t,  $J = 2.4$  Hz, 1H) (alkynyl  $H$ ).  $^{13}\text{C}$  NMR (151 MHz, DMSO- $d_6$ ):  $\delta$  153.32 (CO), 150.04, 132.83, 131.45, 131.18, 129.82, 123.91, 115.08 (aromatic  $C$ ), 77.83, 75.25 (alkynyl  $C$ ), 30.83 ( $\text{CH}_2$ ). HRMS (ESI):  $m/z$  calcd for  $\text{C}_{11}\text{H}_8\text{N}_2\text{O}$  [ $\text{M}+\text{H}$ ] $^+$ : 185.0709. Found: 185.0708. This is a known structure without NMR spectra.<sup>3</sup>

### Ethyl 2-(2-oxoquinoxalin-1(2H)-yl)acetate (1f):

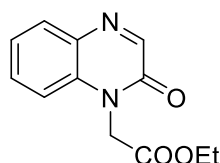

White solid. Yield: 66%.  $^1\text{H}$  NMR (600 MHz, DMSO- $d_6$ ):  $\delta$  8.32 (s, 1H), 8.01 – 7.78 (m, 1H), 7.71 – 7.62 (m, 1H), 7.55 (d,  $J = 8.5$  Hz, 1H), 7.46 – 7.33 (m, 1H) (aromatic  $H$ ), 5.10 (s, 2H), 4.17 (q,  $J = 7.1$  Hz, 2H) ( $\text{CH}_2$ ), 1.21 (t,  $J = 7.1$  Hz, 3H) ( $\text{CH}_3$ ).  $^{13}\text{C}$  NMR (151 MHz, DMSO- $d_6$ ):  $\delta$  167.39, 154.06 (CO), 149.81, 132.65, 132.40, 131.30, 129.87, 123.85, 114.72 (aromatic  $C$ ), 61.44, 43.23 ( $\text{CH}_2$ ), 13.99 ( $\text{CH}_3$ ). This is a known structure. These data are similar to the reported one.<sup>3</sup>

### 1-Acetophenylquinoxalin-2(1H)-one (1g):

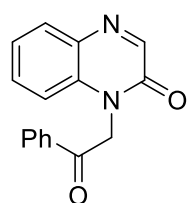

Yellow solid. Yield: 65%. MP: 178.1-182.1 °C.  $^1\text{H}$  NMR (600 MHz, DMSO- $d_6$ ):  $\delta$  8.35 (s, 1H), 8.15 (d,  $J = 7.5$  Hz, 2H), 7.90 (dd,  $J = 8.0, 1.5$  Hz, 1H), 7.77 (t,  $J = 7.4$  Hz, 1H), 7.64 (t,  $J = 7.8$  Hz, 2H), 7.60 (t,  $J = 7.2$  Hz, 1H), 7.52 (d,  $J = 8.5$  Hz, 1H), 7.41 (t,  $J = 7.5$  Hz, 1H) (aromatic  $H$ ), 5.93 (s, 2H) ( $\text{CH}_2$ ).  $^{13}\text{C}$  NMR (151 MHz, DMSO- $d_6$ ):  $\delta$  192.18, 154.17 (CO), 149.77, 134.37, 134.29, 132.83, 132.73, 131.21, 129.80, 128.97, 128.33, 123.67, 115.02 (aromatic  $C$ ), 48.63 ( $\text{CH}_2$ ). HRMS (ESI):  $m/z$  calcd for  $\text{C}_{16}\text{H}_{12}\text{N}_2\text{O}_2$  [ $\text{M}+\text{H}$ ] $^+$ : 265.0972. Found: 265.0971. This is a known structure without NMR spectra.<sup>4</sup>

### 3 General procedure for the synthesis of starting materials (1h-1i).<sup>5</sup>

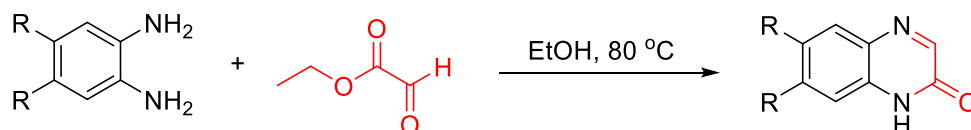

To ethanol (8 ml) suspension solution of *o*-arylenediamine (2 mmol) was added ethyl 2-oxoacetate (2.4 equiv, 50% toluene solution). The reaction system was stirred and heated to refluxing at 80 °C for 1 h, Then the reaction was cooled. The precipitate was filtered and washed with ethanol, and finally dried to give quinoxalin-2(*1H*)-one **1h-1i**.

#### 6,7-Dimethylquinoxalin-2(*1H*)-one (**1h**):

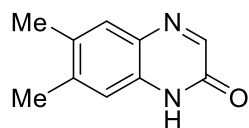

Brown solid. Yield: 73%. <sup>1</sup>H NMR (600 MHz, DMSO-*d*<sub>6</sub>) δ 12.30 (s, 1H) (*NH*), 8.06 (s, 1H), 7.54 (s, 1H), 7.06 (s, 1H) (aromatic *H*), 2.30 (s, 3H), 2.28 (s, 3H) (*CH*<sub>3</sub>). <sup>13</sup>C NMR was unable to be collected due to low solubility. This is a known structure. These data are similar to the reported one.<sup>6</sup>

#### 6,7-Dichloroquinoxalin-2(*1H*)-one (**1i**):

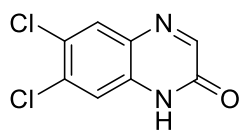

Brown solid. Yield: 75%. <sup>1</sup>H NMR (600 MHz, DMSO-*d*<sub>6</sub>): δ 12.55 (s, 1H) (*NH*), 8.21 (s, 1H), 8.12 – 7.93 (m, 1H), 7.73 – 7.20 (m, 1H) (aromatic *H*). <sup>13</sup>C NMR was unable to be collected due to low solubility. This is a known structure. These data are similar to the reported one.<sup>6</sup>

#### 4 General procedure for the synthesis of starting materials (**2b-2k**).<sup>7</sup>

In a dry, 35mL Schlenk tube equipped with a stir bar was added selenium dioxide (SeO<sub>2</sub>, 1.5 equiv). Then under an atmosphere of nitrogen, the substituted aryl-methylketone (3.0 mmol) were added followed by anhydrous pyridine (10 mL). The reaction mixture was heated in an oil bath to 110 °C for 4 h. Then the solution containing precipitated selenium was filtered, and the residue was washed with ethyl acetate. Pyridine was removed on a rotary evaporator, and the residue was treated with 1 N NaOH (3 mL) and water (20 mL). The resulting aqueous layer was extracted with ethyl acetate (3\*20 mL). The aqueous layers were acidified using 1N HCl (4.0 mL), and water (20 mL) was added. The mixture was extracted with ethyl acetate (3\*20 mL), and the combined organic layers were dried (anhydrous Na<sub>2</sub>SO<sub>4</sub>), and concentrated on a rotary evaporator. The crude arylglyoxylic acid products were purified by silica-gel column chromatography using ethyl acetate and petrol ether as solvent system for elution or used directly without purification.

#### 2-(4-Methoxyphenyl)-2-oxoacetic acid (**2b**):

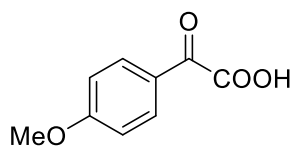

White solid. Yield: 80%. <sup>1</sup>H NMR (600 MHz, DMSO-*d*<sub>6</sub>): δ 7.90 (d, *J* = 7.7 Hz, 2H), 7.53 – 6.64 (m, 2H) (aromatic *H*), 3.88 (s, 3H) (*OCH*<sub>3</sub>). <sup>13</sup>C NMR (151 MHz, DMSO-*d*<sub>6</sub>): δ 187.17 (CO), 166.54 (COOH), 164.72, 132.06, 124.75, 114.75 (aromatic *C*), 55.85 (*OCH*<sub>3</sub>). This is a known structure. These data are similar to the reported one.<sup>8</sup>

### 2-Benzyl-2-oxoacetic acid (2c):

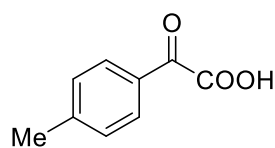

White solid. Yield: 71%.  $^1\text{H}$  NMR (600 MHz,  $\text{DMSO-}d_6$ ):  $\delta$  7.83 (d,  $J = 8.1$  Hz, 2H), 7.43 (d,  $J = 8.0$  Hz, 2H) (aromatic  $H$ ), 2.41 (s, 3H) ( $\text{CH}_3$ ).  $^{13}\text{C}$  NMR (151 MHz,  $\text{DMSO-}d_6$ ):  $\delta$  188.34 (CO), 166.35 (COOH), 146.11, 129.90, 129.60, 129.46 (aromatic C), 21.42 ( $\text{CH}_3$ ). This is a known structure. These data are similar to the reported one.<sup>9</sup>

### 2-(2-Methylphenyl)-2-oxoacetic acid (2d):

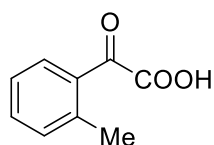

Yellow oil. Yield: 92%.  $^1\text{H}$  NMR (600 MHz,  $\text{DMSO-}d_6$ ):  $\delta$  7.71 (d,  $J = 7.6$  Hz, 1H), 7.59 (t,  $J = 7.5$  Hz, 1H), 7.45 – 7.39 (m, 2H) (aromatic  $H$ ), 2.53 (s, 3H) ( $\text{CH}_3$ ).  $^{13}\text{C}$  NMR (151 MHz,  $\text{DMSO-}d_6$ ):  $\delta$  190.98 (CO), 166.58 (COOH), 140.05, 133.84, 132.33, 131.99, 130.91, 126.39 (aromatic C), 20.81 ( $\text{CH}_3$ ). This is a known structure. These data are similar to the reported one.<sup>9</sup>

### 2-(3-Methylphenyl)-2-oxoacetic acid (2e):

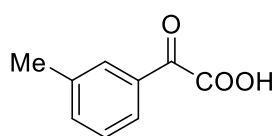

White solid. Yield: 87%.  $^1\text{H}$  NMR (600 MHz,  $\text{DMSO-}d_6$ ):  $\delta$  7.73 (s, 2H), 7.59 (d,  $J = 7.5$  Hz, 1H), 7.51 (t,  $J = 7.8$  Hz, 1H) (aromatic  $H$ ), 2.40 (s, 3H) ( $\text{CH}_3$ ).  $^{13}\text{C}$  NMR (151 MHz,  $\text{DMSO-}d_6$ ):  $\delta$  188.93 (CO), 166.32 (COOH), 138.92, 135.88, 131.96, 129.55, 129.23, 126.88 (aromatic C), 20.79 ( $\text{CH}_3$ ). This is a known structure. These data are similar to the reported one.<sup>8</sup>

### 2-Biphenyl-2-oxoacetic acid (2f):

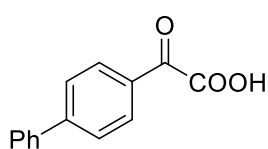

White solid. Yield: 77%.  $^1\text{H}$  NMR (600 MHz,  $\text{DMSO-}d_6$ ):  $\delta$  8.02 (d,  $J = 8.4$  Hz, 2H), 7.93 (d,  $J = 8.2$  Hz, 2H), 7.78 (d,  $J = 7.6$  Hz, 2H), 7.53 (t,  $J = 7.6$  Hz, 2H), 7.46 (t,  $J = 7.3$  Hz, 1H) (aromatic  $H$ ).  $^{13}\text{C}$  NMR (151 MHz,  $\text{DMSO-}d_6$ ):  $\delta$  188.17 (CO), 166.11 (COOH), 146.40, 138.51, 130.72, 130.24, 129.21, 128.86, 127.47, 127.18 (aromatic C). This is a known structure. These data are similar to the reported one.<sup>10</sup>

### 2-(4-Chlorophenyl)-2-oxoacetic acid (2g):

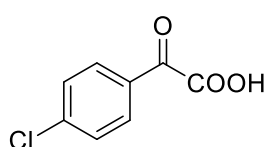

White solid. Yield: 60%.  $^1\text{H}$  NMR (600 MHz,  $\text{DMSO-}d_6$ ):  $\delta$  7.96 (d,  $J = 8.4$  Hz, 2H), 7.69 (m, 2H) (aromatic  $H$ ).  $^{13}\text{C}$  NMR (151 MHz,  $\text{DMSO-}d_6$ ):  $\delta$  187.36 (CO), 165.49 (COOH), 140.11, 131.41, 130.79, 129.49 (aromatic C). This is a known structure. These data are similar to the reported one.<sup>9</sup>

### 2-(4-bromophenyl)-2-oxoacetic acid (2h):

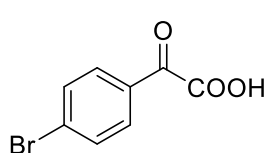

White solid. Yield: 86%.  $^1\text{H}$  NMR (600 MHz,  $\text{DMSO-}d_6$ ):  $\delta$  7.88 (d,  $J = 8.6$  Hz, 2H), 7.84 (d,  $J = 8.6$  Hz, 2H) (aromatic  $H$ ).  $^{13}\text{C}$  NMR (151 MHz,  $\text{DMSO-}d_6$ ):  $\delta$  187.57 (CO), 165.45 (COOH), 132.43, 131.41, 131.09, 129.45 (aromatic C). This is a known structure. These data are similar to the reported one.<sup>8</sup>

### 2-oxo-2-(4-(trifluoromethyl)phenyl)acetic acid (2i):

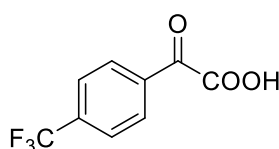

White solid. Yield: 67%.  $^1\text{H}$  NMR (600 MHz,  $\text{DMSO-}d_6$ ):  $\delta$  8.16 (d,  $J = 8.1$  Hz, 2H), 7.98 (d,  $J = 8.1$  Hz, 2H) (aromatic  $H$ ).  $^{13}\text{C}$  NMR (151 MHz,  $\text{DMSO-}d_6$ ):  $\delta$  187.44 (CO), 164.97 (COOH), 135.44, 133.87 (d,  $^3J_{\text{C-F}} = 32.3$  Hz), 130.46, 126.15 (q,  $^4J_{\text{C-F}} = 3.7$  Hz), 123.58 (d,  $^2J_{\text{C-F}} = 272.9$  Hz) (aromatic C). This is a known structure. These data are similar to the reported one.<sup>8</sup>

### 2-( $\beta$ -naphthoyl)acetic acid (2j):

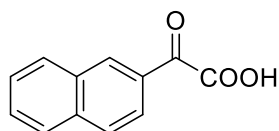

Yellow solid. Yield: 94%.  $^1\text{H}$  NMR (600 MHz,  $\text{DMSO-}d_6$ ):  $\delta$  8.60 (s, 1H), 8.22 (d,  $J = 8.2$  Hz, 1H), 8.12 (d,  $J = 8.6$  Hz, 1H), 8.05 (d,  $J = 8.2$  Hz, 1H), 7.96 (dd,  $J = 8.6, 1.6$  Hz, 1H), 7.75 (t,  $J = 7.1$  Hz, 1H), 7.67 (t,  $J = 7.5$  Hz, 1H) (aromatic  $H$ ).  $^{13}\text{C}$  NMR (151 MHz,  $\text{DMSO-}d_6$ ):  $\delta$  188.78 (CO), 166.26 (COOH), 135.86, 132.88, 131.98, 130.04, 129.80, 129.31, 129.19, 127.92, 127.48, 123.39 (aromatic C). This is a known structure. These data are similar to the reported one.<sup>11</sup>

### 2-( $\alpha$ -naphthoyl)acetic acid (2k):

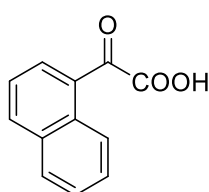

Yellow solid. Yield: 65%.  $^1\text{H}$  NMR (600 MHz,  $\text{DMSO-}d_6$ ):  $\delta$   $^1\text{H}$  NMR (600 MHz,  $\text{DMSO-}d_6$ )  $\delta$  8.91 (d,  $J = 8.6$  Hz, 1H), 8.34 (d,  $J = 8.2$  Hz, 1H), 8.11 (d,  $J = 8.1$  Hz, 1H), 8.07 (d,  $J = 7.2$  Hz, 1H), 7.82 – 7.55 (m, 3H). (aromatic  $H$ ).  $^{13}\text{C}$  NMR (151 MHz,  $\text{DMSO-}d_6$ ):  $\delta$  191.28 (CO), 166.53 (COOH), 135.81, 134.13, 133.62, 130.12, 129.33, 129.11, 127.54, 127.12, 125.04, 124.76 (aromatic C). This is a known structure. These data are similar to the reported one.<sup>12</sup>

## 5 General procedure for the synthesis of product (3a-3t).

A flame-dried Schlenk-tube equipped with a magnetic stir bar was charged with **1** (0.3 mmol), **2** (0.6 mmol, 2.0 equiv) and PIDA (0.45 mmol, 1.5 equiv). Then, the resulting mixture was evacuated, and purged with nitrogen for 3 times. The reaction mixture was stirred at 80 °C for 0.5 h - 1.5 h. After that, 20 mL sat.  $\text{NaHCO}_3$  aq. was added to the reaction mixture, and the resulting solution was extracted with ethyl acetate (20 mL\* 3). The combined organic phase was dried over  $\text{Na}_2\text{SO}_4$ , and then removed under reduced pressure with a rotary evaporator. The crude residue was purified by silica gel column chromatography with ethyl acetate and petrol ether or dichloromethane and ethyl acetate as eluent to give the pure product **3**.

### 3-Benzoylquinoxalin-2(1H)-one (3a):

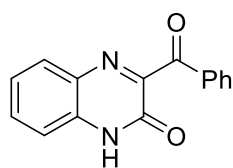

Yellow solid. Yield: 87%.  $^1\text{H}$  NMR (600 MHz,  $\text{DMSO-}d_6$ ):  $\delta$  12.87 (s, 1H) (NH), 7.97 (d,  $J = 7.7$  Hz, 2H), 7.83 (d,  $J = 8.0$  Hz, 1H), 7.74 (t,  $J = 7.4$  Hz, 1H), 7.66 (t,  $J = 7.7$  Hz, 1H), 7.57 (t,  $J = 7.8$  Hz, 2H), 7.41 (d,  $J = 8.2$  Hz, 1H), 7.38 (t,  $J = 7.5$  Hz, 1H) (aromatic H).  $^{13}\text{C}$  NMR (151 MHz,  $\text{DMSO-}d_6$ ):  $\delta$  192.49, 156.30 (CO), 153.42, 134.66, 134.59, 132.71, 131.79, 131.25, 129.69, 129.14, 129.06, 123.86, 115.94 (aromatic C). This is a known structure. These data are similar to the reported one.<sup>3</sup>

### 3-Benzoyl-1-methylquinoxalin-2(1H)-one (3b):

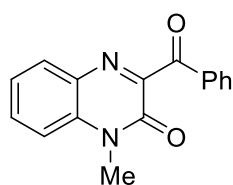

Pale yellow solid. Yield: 87%.  $^1\text{H}$  NMR (600 MHz,  $\text{DMSO-}d_6$ ):  $\delta$  7.98 – 7.96 (m, 2H), 7.89 (dd,  $J = 8.0, 1.5$  Hz, 1H), 7.79 – 7.73 (m, 2H), 7.70 (d,  $J = 8.5$  Hz, 1H), 7.57 (t,  $J = 7.9$  Hz, 2H), 7.48 – 7.45 (m, 1H) (aromatic H), 3.67 (s, 3H) ( $\text{CH}_3$ ).  $^{13}\text{C}$  NMR (151 MHz,  $\text{DMSO-}d_6$ ):  $\delta$  192.28, 154.82 (CO), 152.89, 134.67, 134.46, 133.94, 132.03, 131.72, 129.90, 129.72, 129.03, 123.98, 115.25 (aromatic C), 28.99 ( $\text{CH}_3$ ). This is a known structure. These data are similar to the reported one.<sup>3</sup>

### 3-Benzoyl-1-benzylquinoxalin-2(1H)-one (3c):

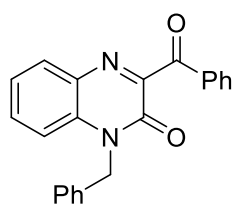

Yellow solid. Yield: 88%.  $^1\text{H}$  NMR (600 MHz,  $\text{DMSO-}d_6$ ):  $\delta$  8.04 (d,  $J = 7.9$  Hz, 2H), 7.92 (d,  $J = 7.9$  Hz, 1H), 7.76 (t,  $J = 7.5$  Hz, 1H), 7.67 (t,  $J = 7.1$  Hz, 1H), 7.59 (m, 3H), 7.44 (t,  $J = 7.6$  Hz, 1H), 7.37 – 7.33 (m, 4H), 7.28 (t,  $J = 6.6$  Hz, 1H) (aromatic H), 5.54 (s, 2H) ( $\text{CH}_2$ ).  $^{13}\text{C}$  NMR (151 MHz,  $\text{DMSO-}d_6$ ):  $\delta$  192.07, 154.86 (CO), 153.07, 135.47, 134.74, 134.45, 133.09, 132.09, 132.03, 130.24, 129.81, 129.08, 128.80, 127.50, 126.89, 124.20, 115.53 (aromatic C), 45.00 ( $\text{CH}_2$ ). This is a known structure. These data are similar to the reported one.<sup>3</sup>

### 1-Allyl-3-benzoylquinoxalin-2(1H)-one (3d):

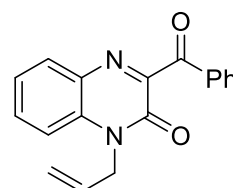

Yellow solid. Yield: 69%.  $^1\text{H}$  NMR (600 MHz,  $\text{DMSO-}d_6$ ):  $\delta$  7.99 (d,  $J = 7.8$  Hz, 2H), 7.90 (d,  $J = 7.9$  Hz, 1H), 7.76 – 7.73 (m, 2H), 7.63 (d,  $J = 8.5$  Hz, 1H), 7.58 (t,  $J = 7.8$  Hz, 2H), 7.46 (t,  $J = 7.6$  Hz, 1H) (aromatic H), 6.01 – 5.95 (m, 1H), 5.24 – 5.16 (m, 2H) (olefinic H), 4.93 (d,  $J = 5.3$  Hz, 2H) ( $\text{CH}_2$ ).  $^{13}\text{C}$  NMR (151 MHz,  $\text{DMSO-}d_6$ ):  $\delta$  192.14, 154.79 (CO), 152.51, 134.72, 134.45, 133.04, 132.02, 131.91, 131.33, 130.11, 129.76, 129.06 (aromatic C), 124.08, 117.46, 115.54 (olefinic C), 43.90 ( $\text{CH}_2$ ). This is a known structure. These data are similar to the reported one.<sup>3</sup>

### 3-Benzoyl-1-(2-propynyl)quinoxalin-2(1H)-one (3e):

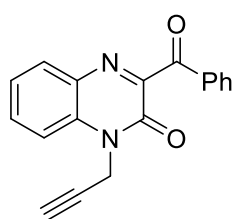

Yellow solid. Yield: 79%.  $^1\text{H}$  NMR (600 MHz,  $\text{DMSO-}d_6$ ):  $\delta$  8.07 – 7.94 (m, 2H), 7.92 (dd,  $J = 8.0, 1.3$  Hz, 1H), 7.87 – 7.80 (m, 1H), 7.77 – 7.70 (m, 2H), 7.58 (t,  $J = 7.8$  Hz, 2H), 7.50 (t,  $J = 7.6$  Hz, 1H) (aromatic  $H$ ), 5.13 (d,  $J = 2.5$  Hz, 2H) ( $\text{CH}_2$ ), 3.43 (t,  $J = 2.5$  Hz, 1H) (alkynyl  $H$ ).  $^{13}\text{C}$  NMR (151 MHz,  $\text{DMSO-}d_6$ ):  $\delta$  191.80, 154.58 (CO), 151.95, 134.81, 134.31, 132.31, 132.24, 131.86, 130.21, 129.81, 129.08, 124.47, 115.41 (aromatic  $C$ ), 77.66, 75.64 (alkynyl  $C$ ), 31.35 ( $\text{CH}_2$ ). This is a known structure. These data are similar to the reported one.<sup>3</sup>

### Ethyl 2-(3-benzoyl-2-oxoquinoxalin-1(2H)-yl)acetate (3f):

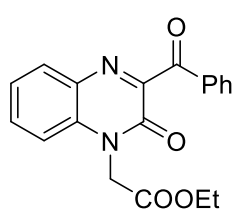

Yellow solid. Yield: 90%.  $^1\text{H}$  NMR (600 MHz,  $\text{DMSO-}d_6$ ):  $\delta$  7.94 (d,  $J = 8.0$  Hz, 3H), 7.81 – 7.71 (m, 2H), 7.69 (d,  $J = 8.5$  Hz, 1H), 7.59 (t,  $J = 7.8$  Hz, 2H), 7.49 (t,  $J = 7.6$  Hz, 1H) (aromatic  $H$ ), 5.18 (s, 2H), 4.19 (q,  $J = 7.1$  Hz, 2H) ( $\text{CH}_2$ ), 1.22 (t,  $J = 7.1$  Hz, 3H) ( $\text{CH}_3$ ).  $^{13}\text{C}$  NMR (151 MHz,  $\text{DMSO-}d_6$ ):  $\delta$  191.72, 167.22, 154.39 (CO), 152.61, 134.85, 134.31, 133.17, 132.39, 131.68, 130.27, 129.64, 129.14, 124.45, 115.09 (aromatic  $C$ ), 61.58 ( $\text{CH}_2$ ), 43.67, 14.00 ( $\text{CH}_3$ ). This is a known structure. These data are similar to the reported one.<sup>3</sup>

### 1-Acetylphenyl-3-benzoylquinoxalin-2(1H)-one (3g):

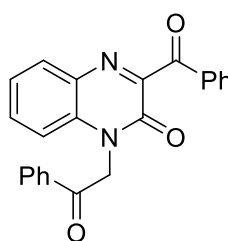

Yellow solid. Yield: 79%.  $^1\text{H}$  NMR (600 MHz,  $\text{DMSO-}d_6$ ):  $\delta$  8.17 – 8.15 (m, 2H), 7.97 – 7.95 (m, 3H), 7.78 – 7.74 (m, 2H), 7.72 – 7.70 (m, 1H), 7.66 – 7.58 (m, 5H), 7.47 – 7.50 (m, 1H) (aromatic  $H$ ), 6.01 (s, 2H) ( $\text{CH}_2$ ).  $^{13}\text{C}$  NMR (151 MHz,  $\text{DMSO-}d_6$ ):  $\delta$  192.03, 191.85, 154.37 (CO), 152.67, 134.81, 134.37, 134.29, 133.59, 132.30, 131.76, 130.20, 129.60, 129.15, 129.00, 128.40, 124.31, 115.39 (aromatic  $C$ ), 49.08 ( $\text{CH}_2$ ). This is a known structure. These data are similar to the reported one.<sup>3</sup>

### 3-Benzoyl-6,7-dimethylquinoxalin-2(1H)-one (3h):

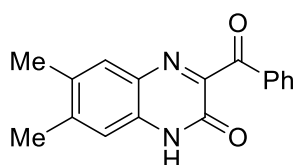

White solid. Yield: 77%.  $^1\text{H}$  NMR (600 MHz,  $\text{DMSO-}d_6$ ):  $\delta$  12.75 (s, 1H) (NH), 7.93 (d,  $J = 8.3$  Hz, 2H), 7.73 (t,  $J = 7.8$  Hz, 1H), 7.60 (s, 1H), 7.56 (t,  $J = 7.6$  Hz, 2H), 7.16 (s, 1H) (aromatic  $H$ ), 2.36 (s, 3H), 2.30 (s, 3H) ( $\text{CH}_3$ ).  $^{13}\text{C}$  NMR (151 MHz,  $\text{DMSO-}d_6$ ):  $\delta$  192.58, 154.80 (CO), 153.46, 141.80, 134.78, 134.50, 132.77, 130.77, 129.75, 129.62, 129.00, 128.83, 115.81 (aromatic  $C$ ), 19.95, 18.87 ( $\text{CH}_3$ ). This is a known structure. These data are similar to the reported one.<sup>3</sup>



### 3-Benzoyl-6,7-dichloroquinoxalin-2(1H)-one (3i):

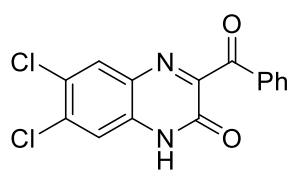

Yellow solid. Yield: 71%.  $^1\text{H}$  NMR (600 MHz,  $\text{DMSO-}d_6$ ):  $\delta$  13.00 (s, 1H) (NH), 8.17 (s, 1H), 8.00 (d,  $J = 7.3$  Hz, 2H), 7.75 (t,  $J = 7.4$  Hz, 1H), 7.58 (t,  $J = 7.9$  Hz, 2H), 7.55 (s, 1H) (aromatic H).  $^{13}\text{C}$  NMR (151 MHz,  $\text{DMSO-}d_6$ ):  $\delta$  191.86, 157.66 (CO), 153.07, 134.87, 134.29, 133.81, 132.67, 130.72, 130.13, 129.79, 129.06, 125.61, 116.93 (aromatic C). This is a known structure. These data are similar to the reported one.<sup>13</sup>

### 3-(4-Methoxybenzoyl)-quinoxalin-2(1H)-one (3j):

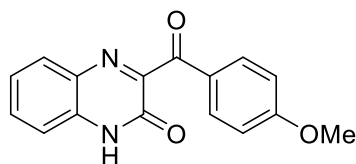

White solid. Yield: 93%. MP: 242.7-243.5 °C.  $^1\text{H}$  NMR (600 MHz,  $\text{DMSO-}d_6$ ):  $\delta$  12.81 (s, 1H) (NH), 7.93 (d,  $J = 8.9$  Hz, 2H), 7.81 (d,  $J = 7.9$  Hz, 1H), 7.64 (t,  $J = 7.7$  Hz, 1H), 7.53 – 7.27 (m, 2H), 7.08 (d,  $J = 8.8$  Hz, 2H) (aromatic H), 3.87 (s, 3H) ( $\text{CH}_3$ ).  $^{13}\text{C}$  NMR (151 MHz,  $\text{DMSO-}d_6$ ):  $\delta$  190.75, 164.27 (CO), 156.65, 153.39, 132.63, 132.19, 131.55, 131.21, 129.03, 127.59, 123.75, 115.85, 114.34 (aromatic C), 55.74 ( $\text{OCH}_3$ ). HRMS (ESI):  $m/z$  calcd for  $\text{C}_{16}\text{H}_{12}\text{N}_2\text{O}_3$   $[\text{M}+\text{H}]^+$ : 281.0921. Found: 281.0914.

### 3-(4-Methylbenzoyl)-quinoxalin-2(1H)-one (3k):

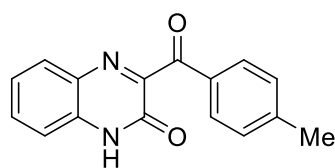

Yellow solid. Yield: 71%.  $^1\text{H}$  NMR (600 MHz,  $\text{DMSO-}d_6$ ):  $\delta$  12.84 (s, 1H) (NH), 7.85 (d,  $J = 8.1$  Hz, 2H), 7.82 (d,  $J = 8.0$  Hz, 1H), 7.65 (t,  $J = 7.7$  Hz, 1H), 7.44 – 7.30 (m, 4H) (aromatic H), 2.41 (s, 3H) ( $\text{CH}_3$ ).  $^{13}\text{C}$  NMR (151 MHz,  $\text{DMSO-}d_6$ ):  $\delta$  191.99, 156.50 (CO), 153.39, 145.39, 132.67, 132.20, 131.67, 131.23, 129.80, 129.59, 129.09, 123.81, 115.91 (aromatic C), 21.37 ( $\text{CH}_3$ ). This is a known structure. These data are similar to the reported one.<sup>14</sup>

### 3-(2-methylbenzoyl)-quinoxalin-2(1H)-one (3l):

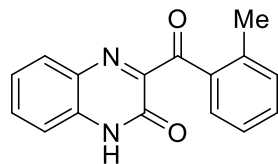

White solid. Yield: 84%. MP: 202.1-204.6 °C.  $^1\text{H}$  NMR (600 MHz,  $\text{DMSO-}d_6$ ):  $\delta$  12.84 (s, 1H) (NH), 7.81 (d,  $J = 8.0$  Hz, 1H), 7.69 (d,  $J = 7.8$  Hz, 1H), 7.64 (t,  $J = 7.7$  Hz, 1H), 7.56 (t,  $J = 7.5$  Hz, 1H), 7.43 – 7.34 (m, 3H), 7.32 (d,  $J = 7.5$  Hz, 1H) (aromatic H), 2.57 (s, 3H) ( $\text{CH}_3$ ).  $^{13}\text{C}$  NMR (151 MHz,  $\text{DMSO-}d_6$ ):  $\delta$  194.35, 156.99 (CO), 153.28, 139.43, 133.94, 133.23, 132.65, 132.43, 132.10, 131.70, 131.14, 129.09, 126.13, 123.82, 115.86 (aromatic C), 21.13 ( $\text{CH}_3$ ). HRMS (ESI):  $m/z$  calcd for  $\text{C}_{16}\text{H}_{12}\text{N}_2\text{O}_2$   $[\text{M}+\text{H}]^+$ : 265.0972. Found: 265.0966.

### 3-(3-Methylbenzoyl)-quinoxalin-2(1H)-one (3m):

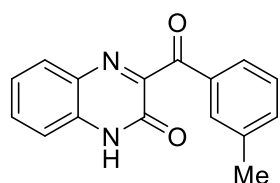

Yellow solid. Yield: 64%. MP: 182.0-182.7 °C. <sup>1</sup>H NMR (600 MHz, DMSO-*d*<sub>6</sub>): δ 12.84 (s, 1H) (NH), 7.83 (d, *J* = 7.9 Hz, 1H), 7.78 (s, 1H), 7.75 (d, *J* = 7.8 Hz, 1H), 7.65 (t, *J* = 7.7 Hz, 1H), 7.55 (d, *J* = 7.5 Hz, 1H), 7.45 (t, *J* = 7.6 Hz, 1H), 7.43 – 7.34 (m, 2H) (aromatic *H*), 2.37 (s, 3H) (CH<sub>3</sub>). <sup>13</sup>C NMR (151 MHz, DMSO-*d*<sub>6</sub>): δ 192.63, 156.49 (CO), 153.37, 138.58, 135.27, 134.65, 132.67, 131.66, 131.24, 129.87, 129.10, 128.89, 126.90, 123.79, 115.90 (aromatic *C*), 20.71 (CH<sub>3</sub>). HRMS (ESI): *m/z* calcd for C<sub>16</sub>H<sub>12</sub>N<sub>2</sub>O<sub>2</sub> [M+H]<sup>+</sup>: 265.0972. Found: 265.0966. This is a known structure. These data are similar to the reported one.<sup>15</sup>

### 3-(1-Biphenylcarbonyl)quinoxalin-2(1H)-one (3n):

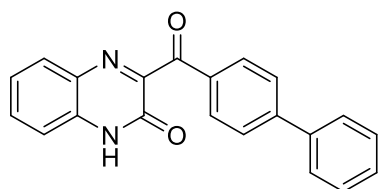

Yellow solid. Yield: 71%. MP: 287.3-290 °C. <sup>1</sup>H NMR (600 MHz, DMSO-*d*<sub>6</sub>): δ 12.88 (s, 1H) (NH), 8.05 (d, *J* = 8.3 Hz, 2H), 7.87 (d, *J* = 8.3 Hz, 2H), 7.85 (d, *J* = 8.2 Hz, 1H), 7.77 (d, *J* = 7.6 Hz, 2H), 7.66 (t, *J* = 7.7 Hz, 1H), 7.52 (t, *J* = 7.6 Hz, 2H), 7.48 – 7.36 (m, 3H) (aromatic *H*). <sup>13</sup>C NMR (151 MHz, DMSO-*d*<sub>6</sub>): δ 191.98, 156.27 (CO), 153.43, 145.93, 138.72, 133.43, 132.74, 131.79, 131.27, 130.41, 129.16, 128.69, 127.24, 127.16, 123.85, 115.94 (aromatic *C*). HRMS (ESI): *m/z* calcd for C<sub>21</sub>H<sub>14</sub>N<sub>2</sub>O<sub>2</sub> [M+H]<sup>+</sup>: 327.1128. Found: 327.1121.

### 3-(4-Chlorobenzoyl)-quinoxalin-2(1H)-one (3o):

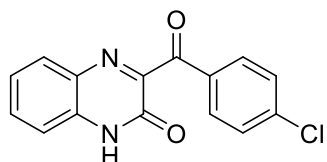

Yellow solid. Yield: 35%. MP: 250.4-252.1 °C. <sup>1</sup>H NMR (600 MHz, DMSO-*d*<sub>6</sub>): δ 12.87 (s, 1H) (NH), 8.01 (d, *J* = 8.5 Hz, 2H), 7.83 (d, *J* = 7.6 Hz, 1H), 7.67 – 7.64 (m, 3H), 7.42 – 7.35 (m, 2H) (aromatic *H*). <sup>13</sup>C NMR (126 MHz, DMSO-*d*<sub>6</sub>): δ 191.39, 155.66 (CO), 153.40, 139.66, 133.32, 132.82, 131.94, 131.58, 131.26, 129.23, 129.20, 123.87, 115.93 (aromatic *C*). HRMS (ESI): *m/z* calcd for C<sub>15</sub>H<sub>9</sub>ClN<sub>2</sub>O<sub>2</sub> [M+H]<sup>+</sup>: 285.0425. Found: 285.0424. This is a known structure without spectra.<sup>16</sup>

### 3-(4-Bromobenzoyl)-quinoxalin-2(1H)-one (3p):

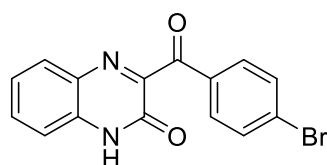

Pale yellow solid. Yield: 43%. <sup>1</sup>H NMR (600 MHz, DMSO-*d*<sub>6</sub>): δ 12.88 (s, 1H) (NH), 7.93 (dd, *J* = 8.5, 1.5 Hz, 2H), 7.83 (d, *J* = 7.9 Hz, 1H), 7.81 – 7.72 (m, 2H), 7.66 (t, *J* = 7.7 Hz, 1H), 7.45 – 7.32 (m, 2H) (aromatic *H*). <sup>13</sup>C NMR (151 MHz, DMSO-*d*<sub>6</sub>): δ 191.61, 155.62 (CO), 153.39, 133.64, 132.81, 132.17, 131.95, 131.60, 131.25, 129.20, 128.99, 123.87, 115.93 (aromatic *C*). This is a known structure.

These data are similar to the reported one.<sup>14</sup>

### 3-( $\beta$ -naphthoyl)-quinoxalin-2(1H)-one (3r):

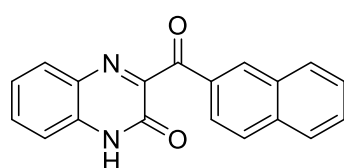

Yellow solid. Yield: 24%. <sup>1</sup>H NMR (600 MHz, DMSO-*d*<sub>6</sub>):  $\delta$  12.90 (s, 1H) (NH), 8.63 (s, 1H), 8.17 – 8.08 (m, 2H), 8.07 – 7.99 (m, 2H), 7.86 (d, *J* = 8.0 Hz, 1H), 7.72 (t, *J* = 7.5 Hz, 1H), 7.68 (t, *J* = 7.7 Hz, 1H), 7.62 (t, *J* = 7.5 Hz, 1H), 7.44 (d, *J* = 8.2 Hz, 1H), 7.40 (t, *J* = 7.6 Hz, 1H) (aromatic *H*). <sup>13</sup>C NMR (151 MHz, DMSO-*d*<sub>6</sub>):  $\delta$  192.60, 156.56 (CO), 153.54, 135.65, 133.32, 132.80, 132.12, 131.99, 131.72, 131.40, 129.84, 129.45, 129.19, 128.84, 127.84, 127.20, 123.82, 123.48, 115.93 (aromatic C). HRMS (ESI): *m/z* calcd for C<sub>9</sub>H<sub>12</sub>N<sub>2</sub>O<sub>2</sub> [M+H]<sup>+</sup>: 301.0965. Found: 301.0972.

### 3-( $\alpha$ -Naphthoyl)-quinoxalin-2(1H)-one (3s):

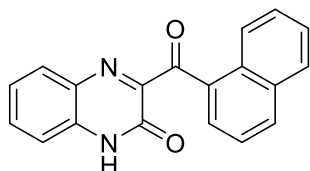

Yellow solid. Yield: 70%. MP: decomposed. <sup>1</sup>H NMR (600 MHz, DMSO-*d*<sub>6</sub>):  $\delta$  12.88 (s, 1H) (NH), 9.01 (d, *J* = 8.6 Hz, 1H), 8.29 (d, *J* = 8.2 Hz, 1H), 8.11 (d, *J* = 8.2 Hz, 1H), 8.08 (s, 1H), 7.83 (d, *J* = 7.9 Hz, 1H), 7.80 – 7.74 (m, 1H), 7.72 – 7.64 (m, 2H), 7.59 (t, *J* = 7.7 Hz, 2H), 7.42 (d, *J* = 8.2 Hz, 1H), 7.40 – 7.33 (m, 1H) (aromatic *H*). <sup>13</sup>C NMR (151 MHz, DMSO-*d*<sub>6</sub>):  $\delta$  194.45, 157.05 (CO), 153.47, 135.05, 134.13, 133.60, 132.77, 131.72, 131.24, 130.69, 130.10, 129.15, 129.02, 128.92, 126.89, 125.12, 124.94, 123.82, 115.87 (aromatic C). HRMS (ESI): *m/z* calcd for C<sub>9</sub>H<sub>12</sub>N<sub>2</sub>O<sub>2</sub> [M+H]<sup>+</sup>: 301.0965. Found: 301.0972.

### 1-methyl-3-methoxyquinoxalin-2(1H)-one (3t):

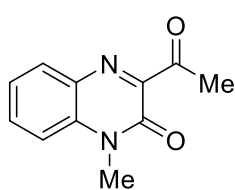

Yellow solid. Yield: 36%. <sup>1</sup>H NMR (600 MHz, DMSO-*d*<sub>6</sub>):  $\delta$  7.89 (dd, *J* = 8.0, 1.5 Hz, 1H), 7.80 – 7.68 (m, 1H), 7.63 (d, *J* = 8.5 Hz, 1H), 7.52 – 7.32 (m, 1H) (aromatic *H*), 3.64 (s, 3H), 2.58 (s, 3H) (CH<sub>3</sub>). <sup>13</sup>C NMR (151 MHz, DMSO-*d*<sub>6</sub>):  $\delta$  198.67, 152.93 (CO), 152.24, 134.18, 132.48, 131.22, 130.23, 123.94, 115.08 (aromatic C), 28.90, 28.55 (CH<sub>3</sub>). This is a known structure. These data are similar to the reported one.<sup>13</sup>

## 6 Radical trapping experiment.

A flame-dried Schlenk-tube equipped with a magnetic stir bar was charged with **1** (0.3 mmol), **2** (0.6 mmol, 2.0 equiv), PIDA (0.45 mmol, 1.5 equiv) and TEMPO (1 equiv or 2 equiv). Then, the resulting mixture was evacuated, and purged with nitrogen for 3 times. The reaction mixture was stirred at 80 °C for 0.5 h. Then the reaction mixture was concentrated, and analyzed by HRMS.

| Formula (M)                                     | Ion Formula        | Measured m/z | Calc m/z | Diff (ppm) |
|-------------------------------------------------|--------------------|--------------|----------|------------|
| C <sub>16</sub> H <sub>23</sub> NO <sub>2</sub> | [M+H] <sup>+</sup> | 262.1800     | 262.1802 | -0.76      |

3\_200603075235 #473 RT: 4.61 AV: 1 NL: 1.61E10  
T: FTMS + p ESI Full ms [100.0000-1500.0000]

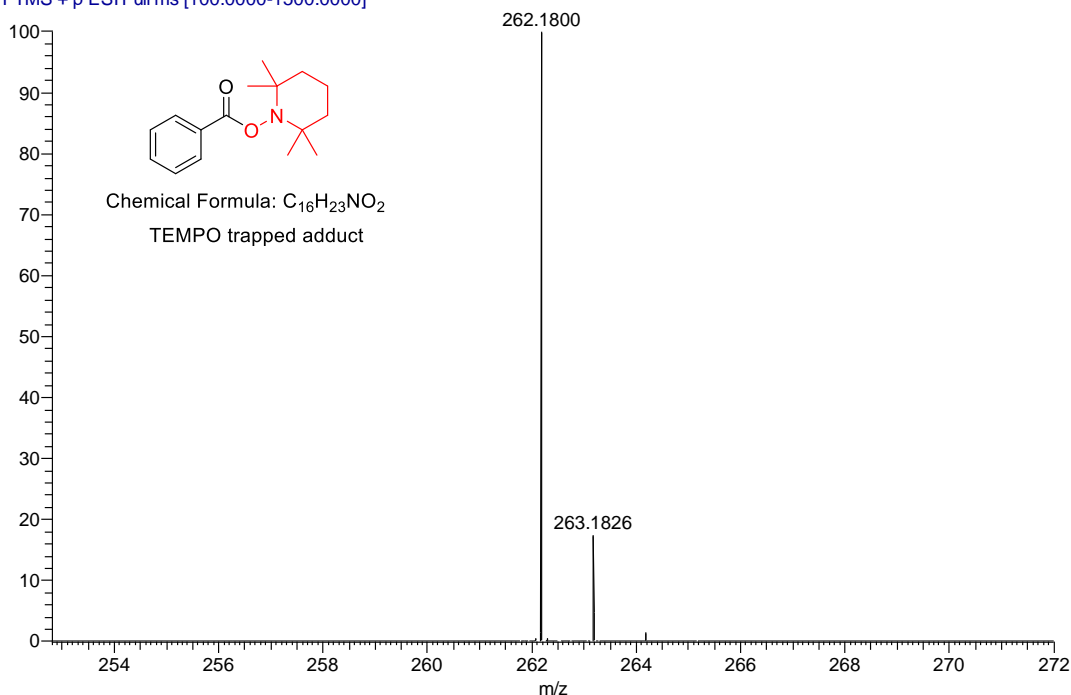

## 7 Synthesis of potential antitumor agent.<sup>16</sup>

A mixture of **3a** (0.5 mmol) and an excess of POCl<sub>3</sub> (1.25 mmol) was stirred under heating at 120 °C for 3 h. On cooling, the mixture was taken up with ice, and the aqueous solution was extracted with ethyl acetate for three times. The combined organic phase was dried over Na<sub>2</sub>SO<sub>4</sub>, and then removed under reduced pressure with a rotary evaporator. The crude residue was purified by silica gel column chromatography with ethyl acetate and petrol ether as eluent to give the pure product **4a** as a yellow solid.

### 3-Benzoyl-2-chloroquinoxaline (**4a**):

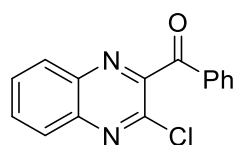

Yellow solid. Yield: 76%. <sup>1</sup>H NMR (600 MHz, Chloroform-*d*): δ 8.17 – 8.10 (m, 2H), 8.93 – 7.88 (m, 3H), 7.86 (t, *J* = 7.5 Hz, 1H), 7.68 (t, *J* = 7.4 Hz, 1H), 7.52 (t, *J* = 7.7 Hz, 2H) (aromatic *H*). <sup>13</sup>C NMR (151 MHz, DMSO-*d*<sub>6</sub>): δ 191.32 (CO), 149.89, 142.89, 141.67, 139.30, 135.16, 134.26, 132.81, 131.65, 130.38, 129.21, 129.16, 128.21 (aromatic *C*). This is a known structure. These data are similar to the reported one.<sup>16</sup>

A mixture of chloroquinoxaline (**4a**, 0.3 mmol) and 1-phenylpiperazine (1.5mmol) was stirred under heating at 100 °C for 2 h. On cooling, the mixture was taken up with water, and the aqueous solution was extracted with ethyl acetate for three times. The

combined organic phase was dried over Na<sub>2</sub>SO<sub>4</sub>, and then removed under reduced pressure with a rotary evaporator. The crude residue was purified by silica gel column chromatography with ethyl acetate and petrol ether to give the pure product **5a** as a yellow solid.

### 3-Benzoyl-2-(4-phenylpiperazine)quinoxaline (**5a**):

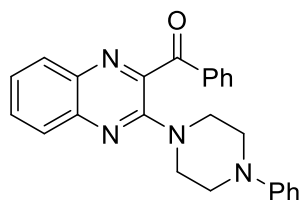

Yellow solid. Yield: 89%. <sup>1</sup>H NMR (600 MHz, Chloroform-*d*): δ 8.05 (d, *J* = 7.9 Hz, 2H), 7.95 (d, *J* = 8.2 Hz, 1H), 7.83 (d, *J* = 8.4 Hz, 1H), 7.74 – 7.61 (m, 2H), 7.59 – 7.42 (m, 3H), 7.35 – 7.13 (m, 2H), 7.03 – 6.76 (m, 3H) (aromatic *H*), 3.70 (t, *J* = 5.1 Hz, 4H), 3.18 (t, *J* = 5.1 Hz, 4H) (CH<sub>2</sub>). <sup>13</sup>C NMR (151 MHz, DMSO-*d*<sub>6</sub>): δ 192.76 (CO), 151.40, 150.57, 144.14, 140.97, 135.28, 134.88, 134.48, 131.58, 130.47, 129.00, 128.95, 128.74, 126.31, 126.06, 119.06, 115.42 (aromatic *C*), 47.49, 47.29 (CH<sub>2</sub>). This is a known structure. These data are similar to the reported one.<sup>16</sup>

### References:

- 1 S. Liu, Y.-G. Huang, F.-L. Qing and X.-H. Xu. *Org. Lett.*, **2018**, *20*, 5497.
- 2 D.-B. Chen, Z.-J. Wang and W.-L. Bao. *J. Org. Chem.*, **2010**, *75*, 5768.
- 3 H. M. Mbuvi, E. R. Klobukowski, G. M. Roberts and L. K. Woo. *J. Porphyrins Phthalocyanines.*, **2010**, *14*, 290.
- 4 J. Lu, X.-K. He, X. Cheng, A.-J. Zhang, G.-Y. Xu and J. Xuan. *Adv. Synth. Catal.*, **2020**, *362*, 2178.
- 5 L. Sumunnee, C. Pimpasri, M. Noikham and S. Yotphan. *Org. Biomol. Chem.*, **2018**, *16*, 2697.
- 6 T. M. Dhameliya, S. S. Chourasiya, E. Mishra, P. S. Jadhavar, P. V. Bharatam and A. K. Chakraborti, *J. Org. Chem.*, **2017**, *82*, 10077.
- 7 K. Wadhwa, C. Yang, P. R. West, K. C. Deming, S. R. Chemburkar and R. E. Reddy. *Synthetic Comm.*, **2008**, *38*, 4434.
- 8 K. Furukawa, H. Inada, M. Shibuya, Y. Yamamoto. *Org. Lett.* **2016**, *18*, 4230.
- 9 T. Morack, C. Mück-Lichtenfeld, R. Gilmour. *Angew. Chem. Int. Ed.* **2019**, *58*, 1208.
- 10 J. Martin, L. Ji-Woong. *Angew. Chem. Int. Ed.* **2018**, *57*, 12318.
- 11 P.-C. Yan, J.-H. Xie, X.-D. Zhang, K. Chen, Y.-Q. Li, Q.-L. Zhou, D.-Q. Che. *Chem. Commun.* **2014**, *50*, 15987.
- 12 N. Watanabe, M. Hamano, S. Todaka, T. Asaeda, H. K. Ijuin, M. J. Matsumoto. *Org. Chem.* **2012**, *77*, 632.
- 13 X.-B. Zeng, C.-L. Liu, X.-Y. Wang, J.-L. Zhang, Y.-F. Hu. *Org. Biomol. Chem.* **2017**, *15*, 8929.
- 14 J.-W. Yuan, J.-H. Fu, S.-N. Liu, Y.-M. Xiao, P. Mao, L.-B. Qu. *Org. Biomol. Chem.*

- 2018**, *16*, 3203.
- 15 R. Isanov, B. Holmelid, K. W. Törnroos, L. K. Sydnes. *J. Heterocyclic. Chem.* **2015**, *52*, 711.
- 16 S. Piras, M. Loriga, A. Carta, G. Paglietti, M. P. Costi, S. Ferrari. *J. Heterocyclic. Chem.* **2006**, *43*, 541.

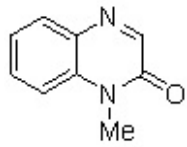

**1b**

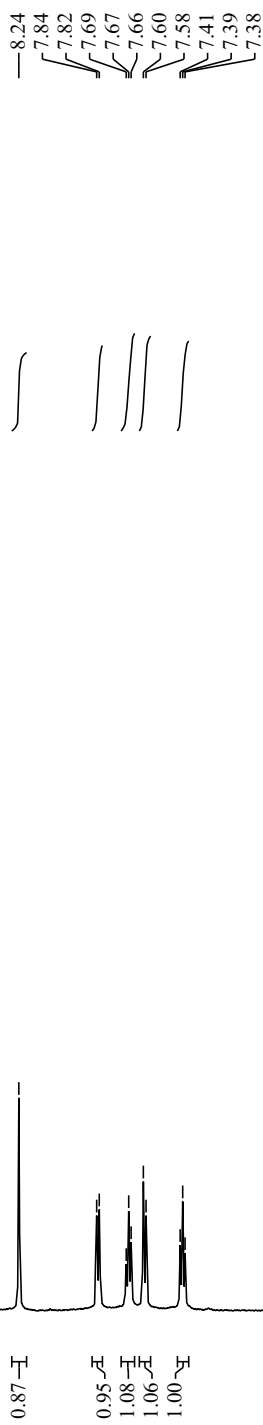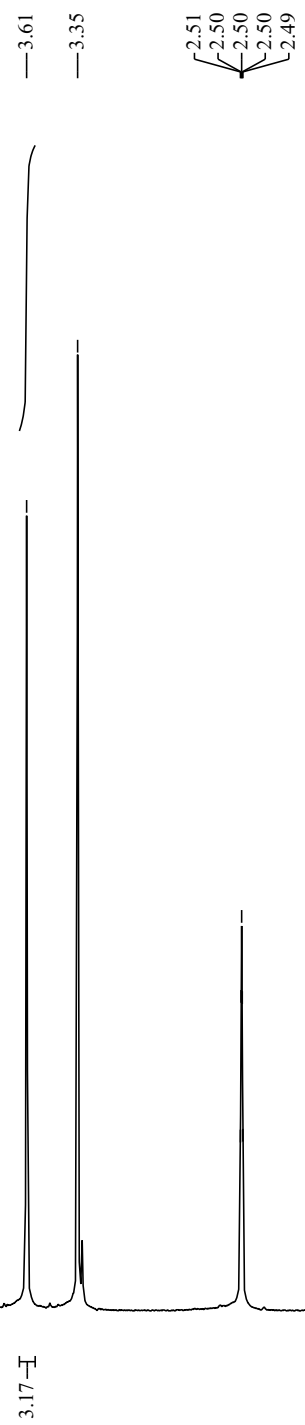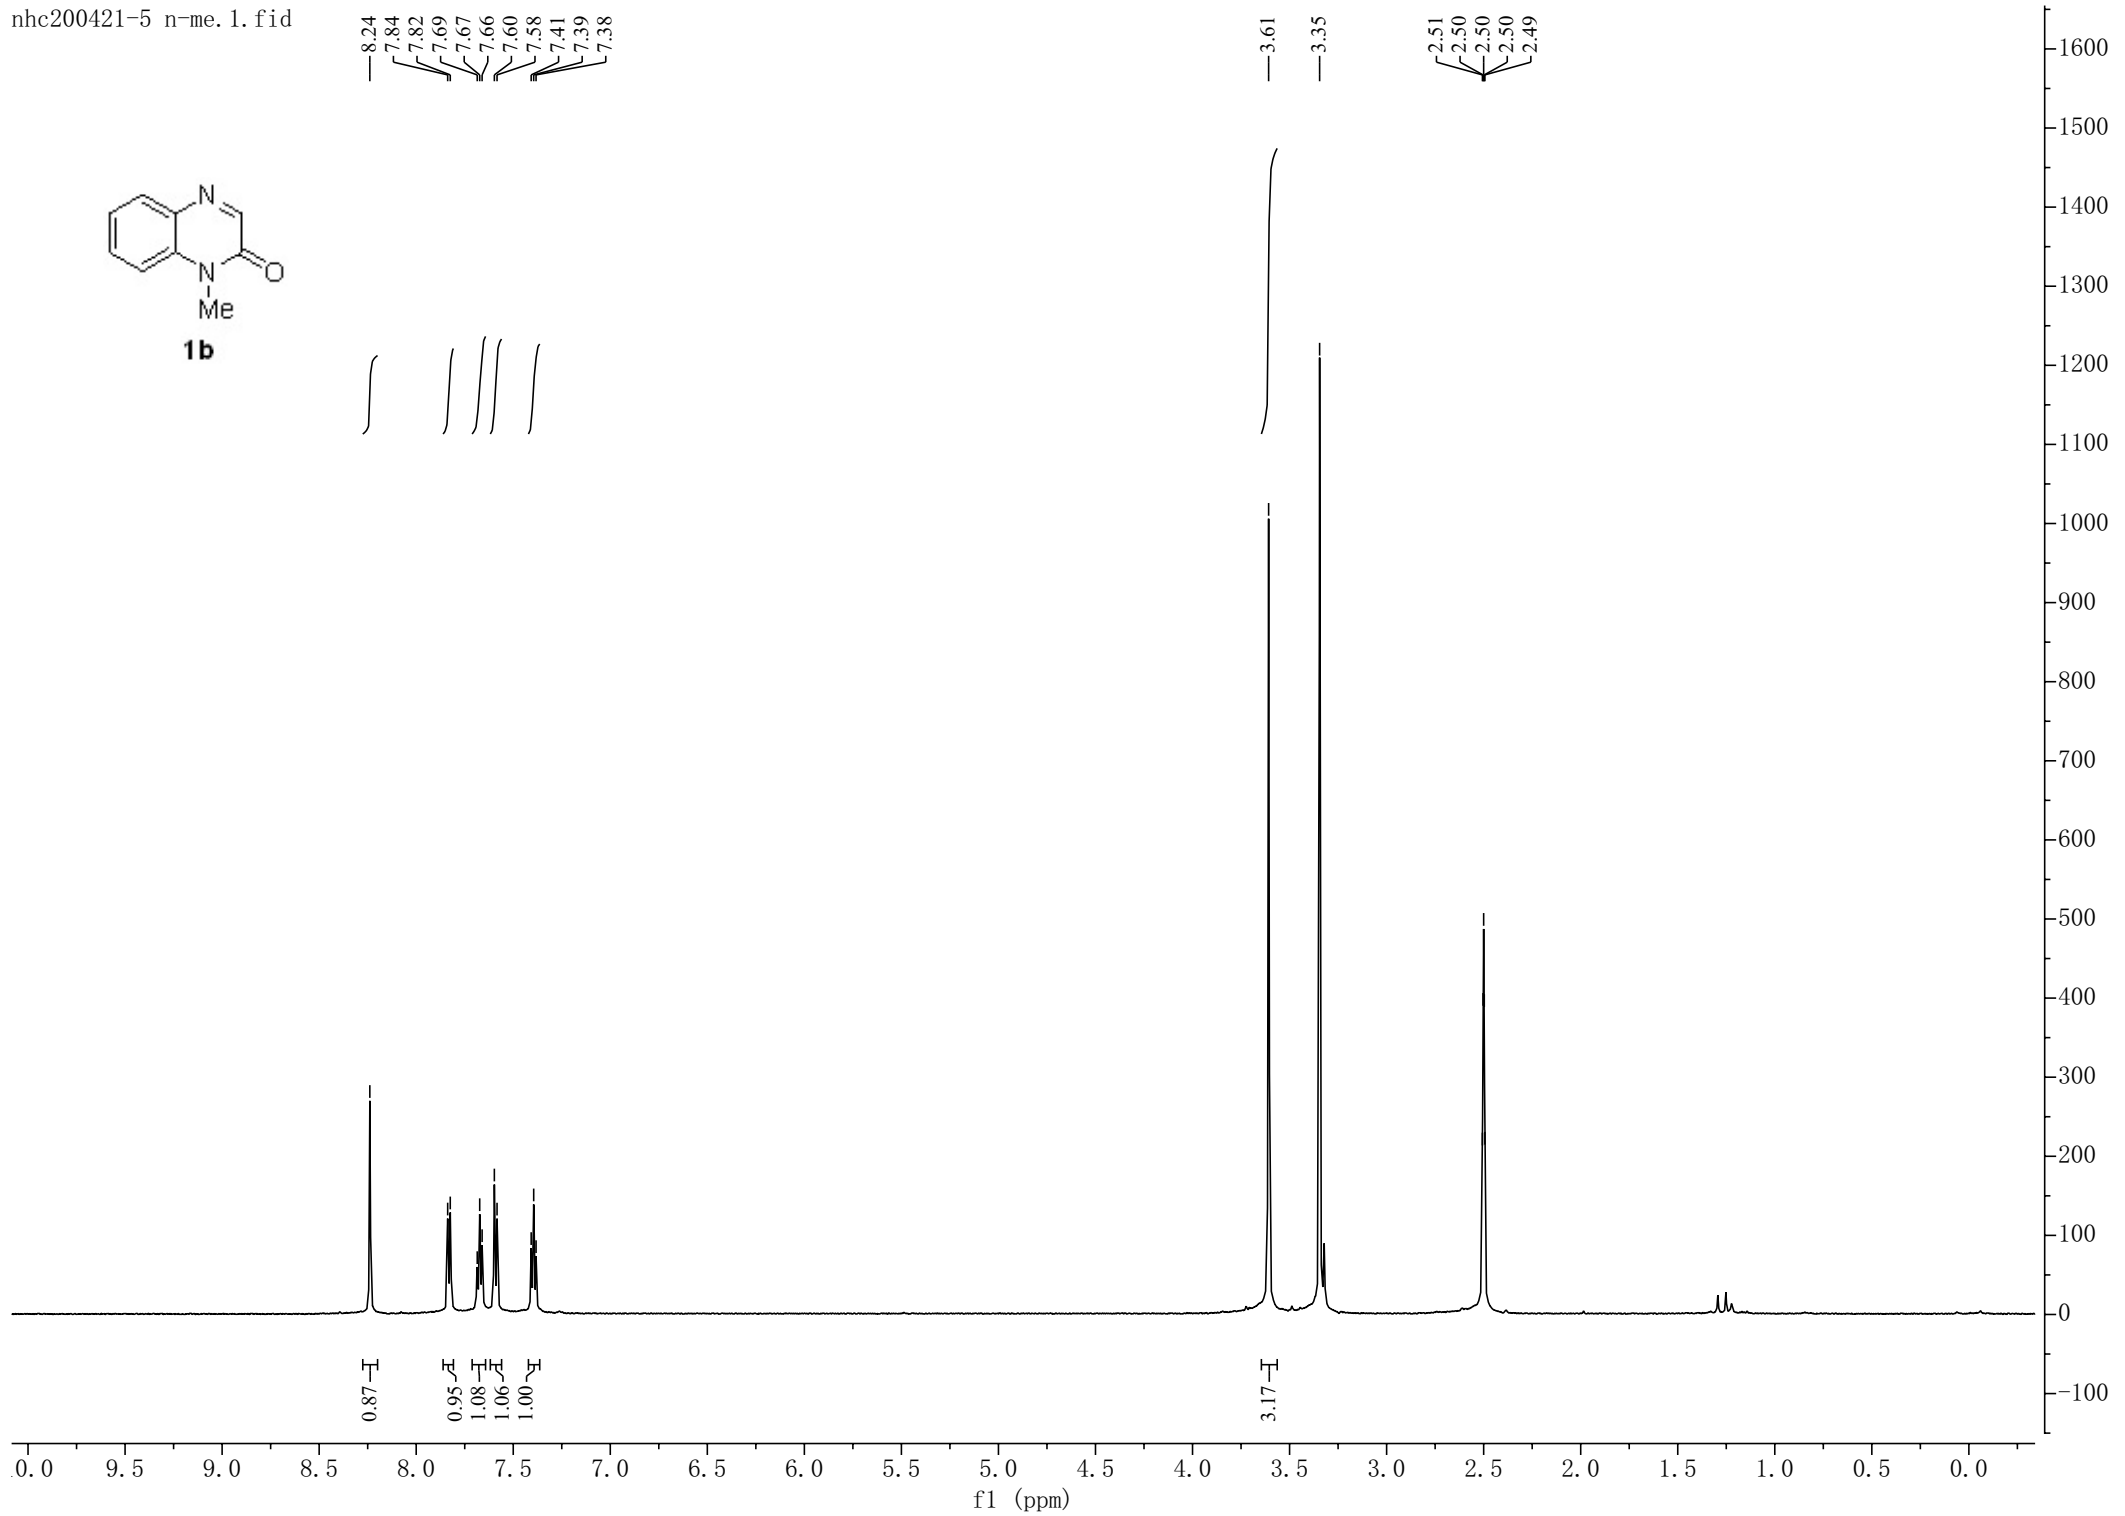

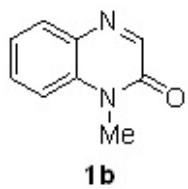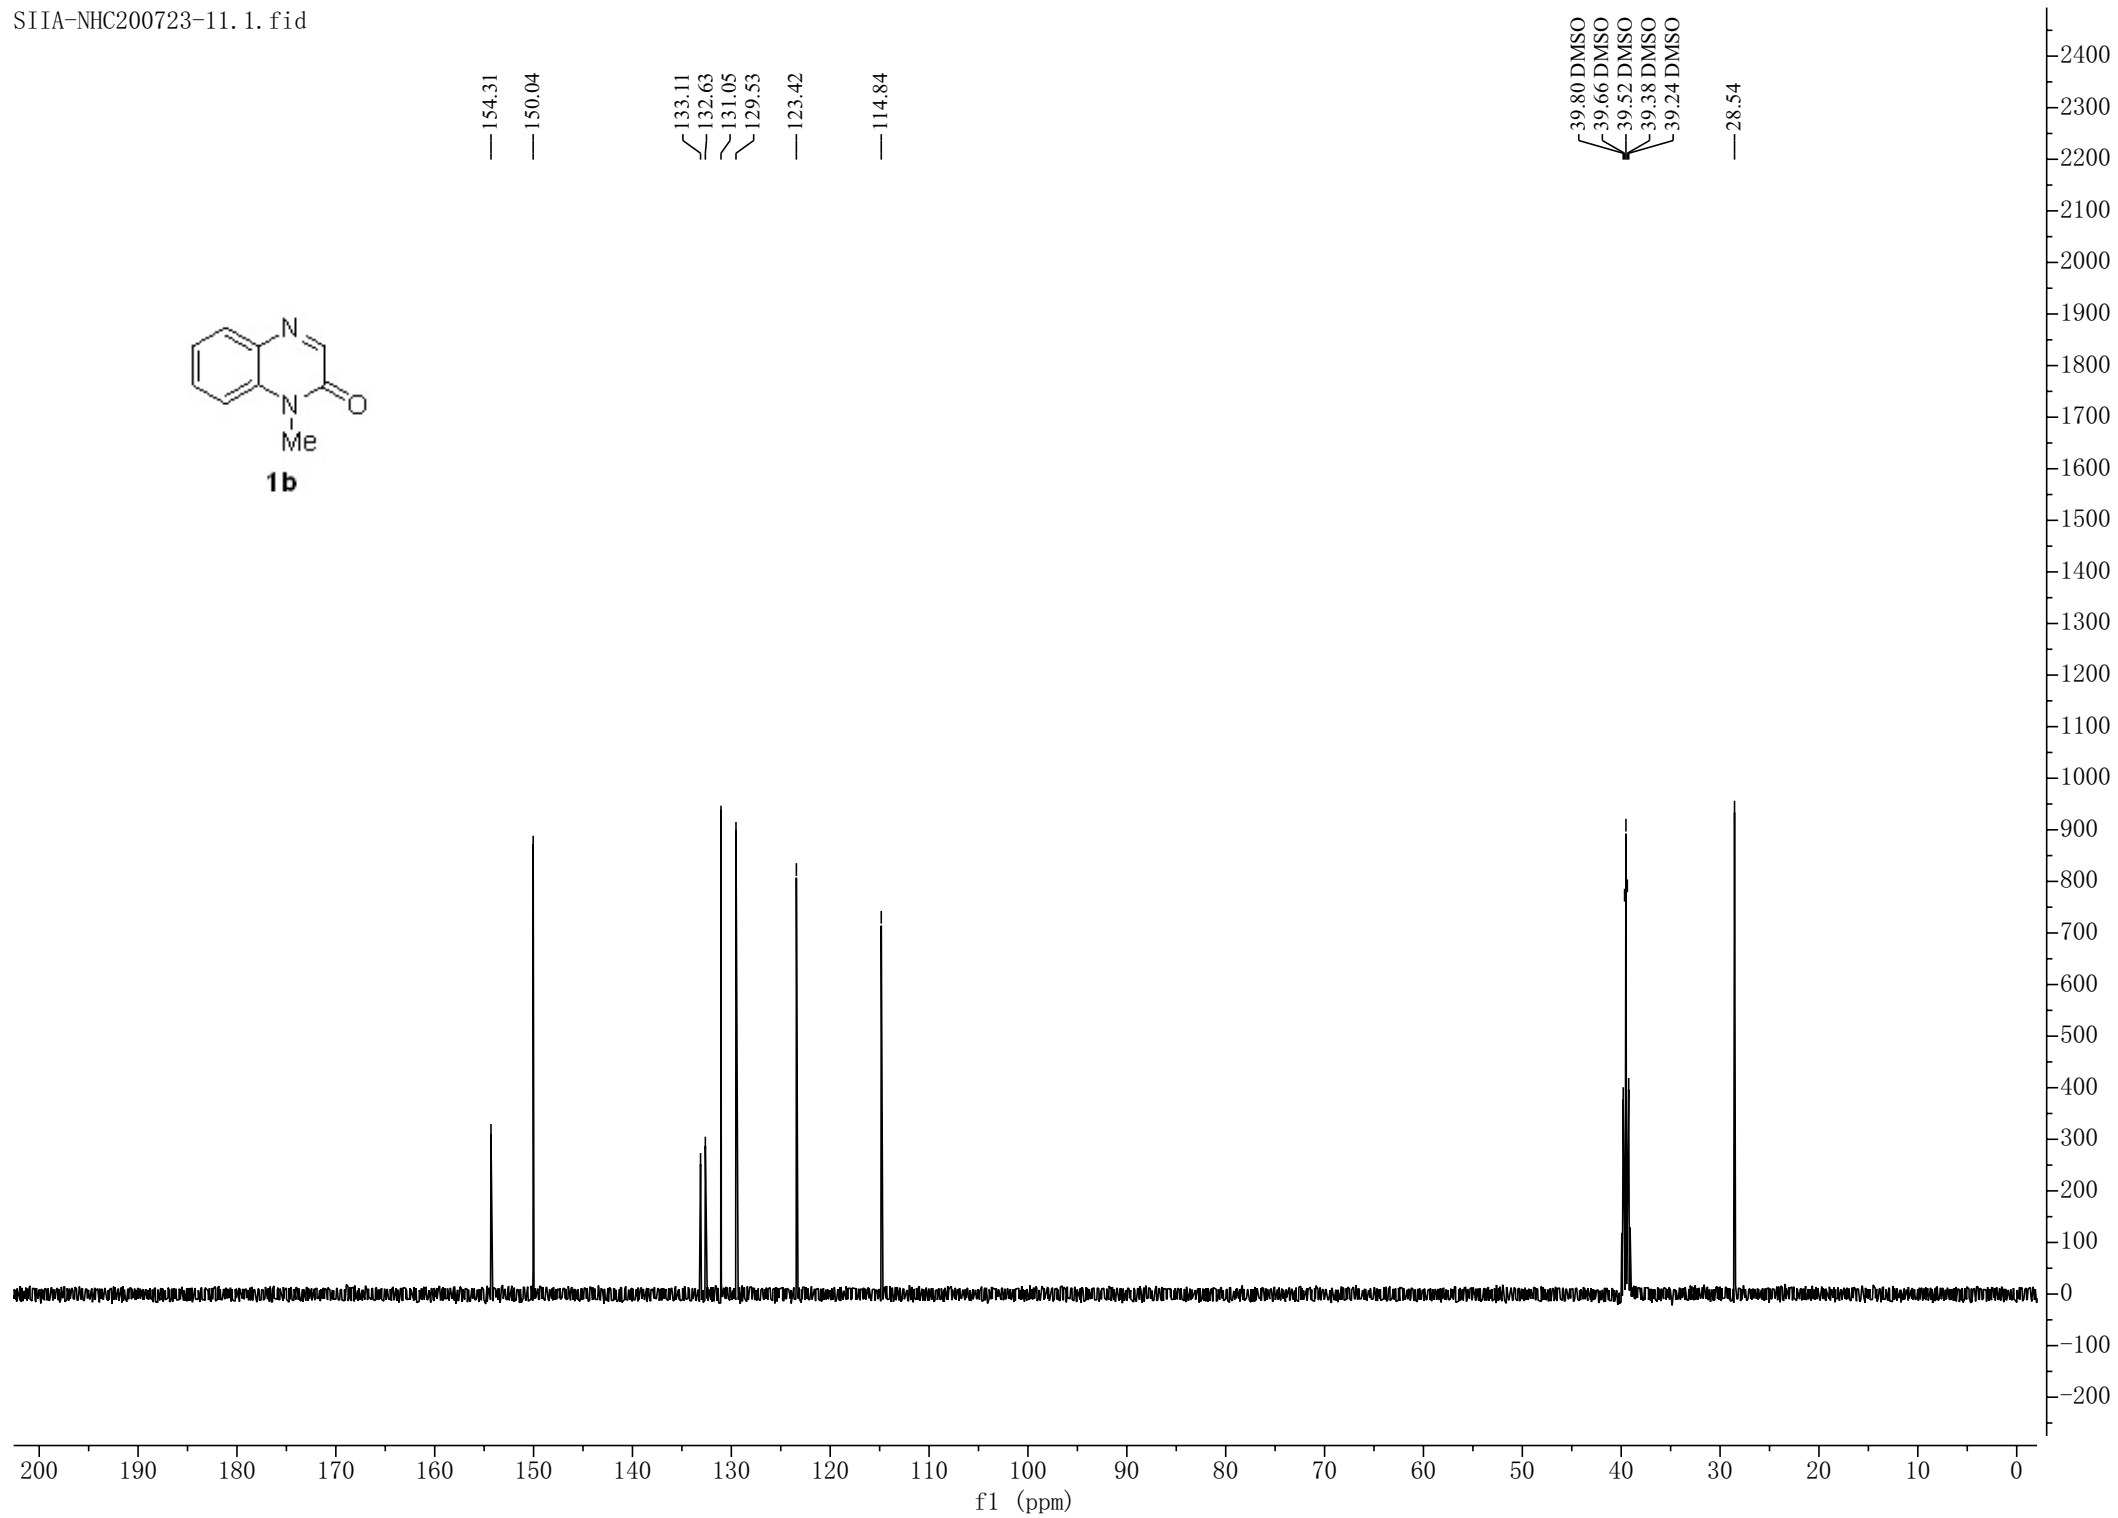





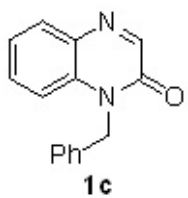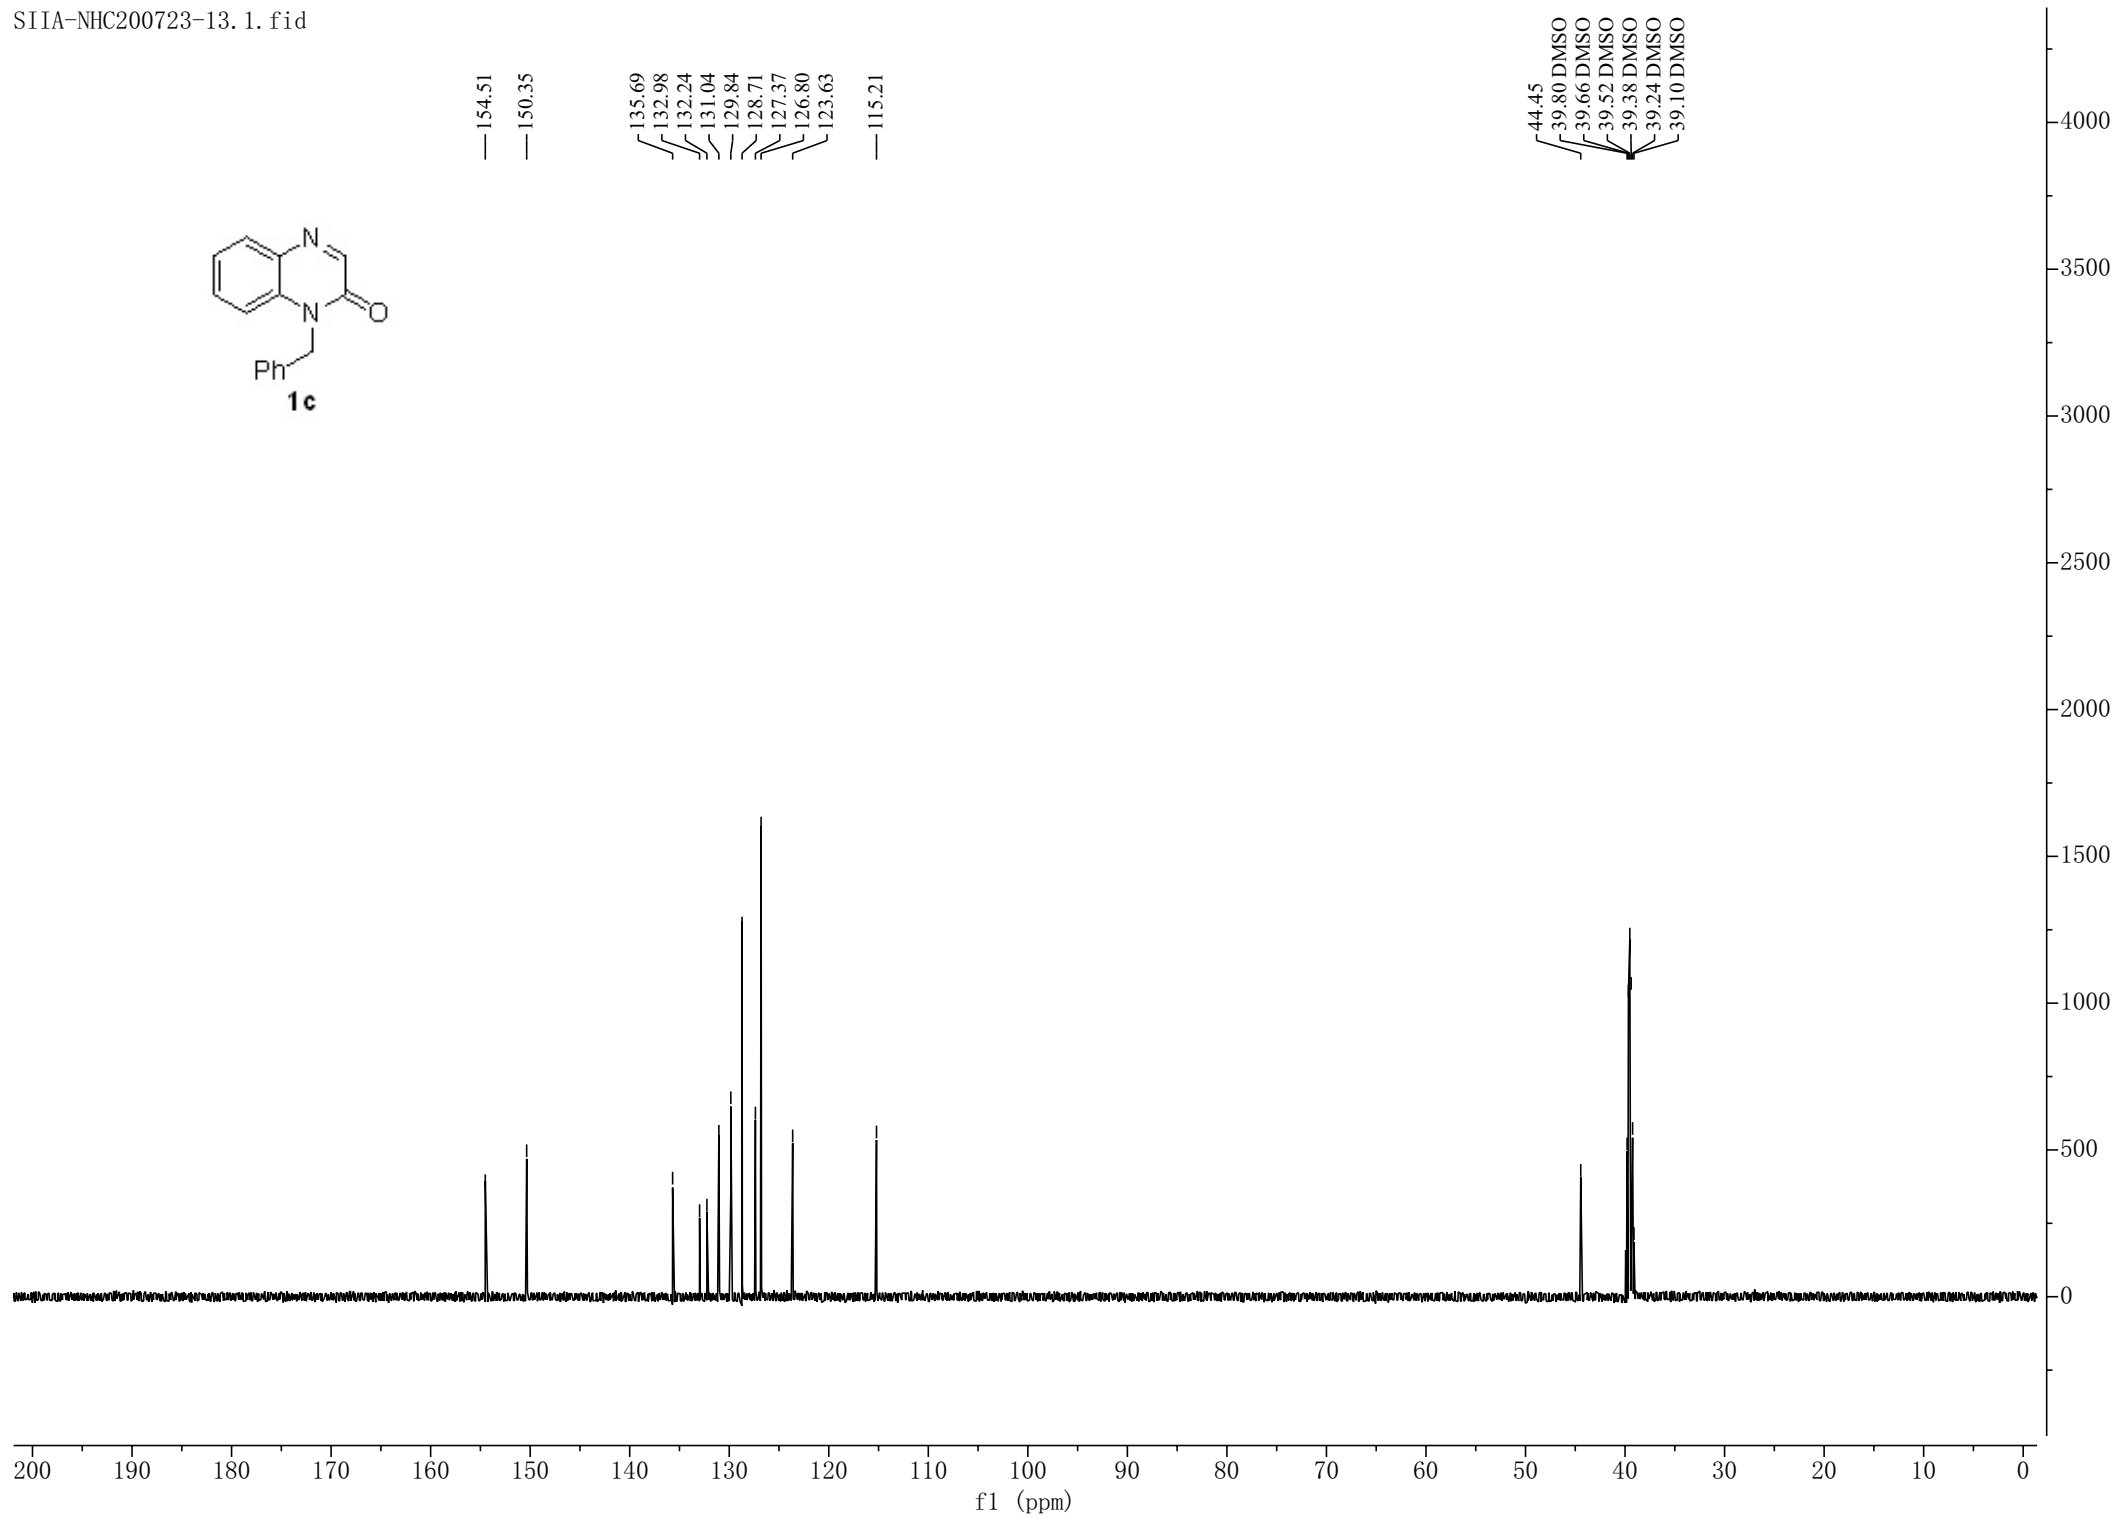

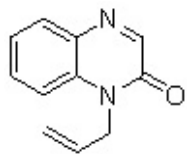

**1d**

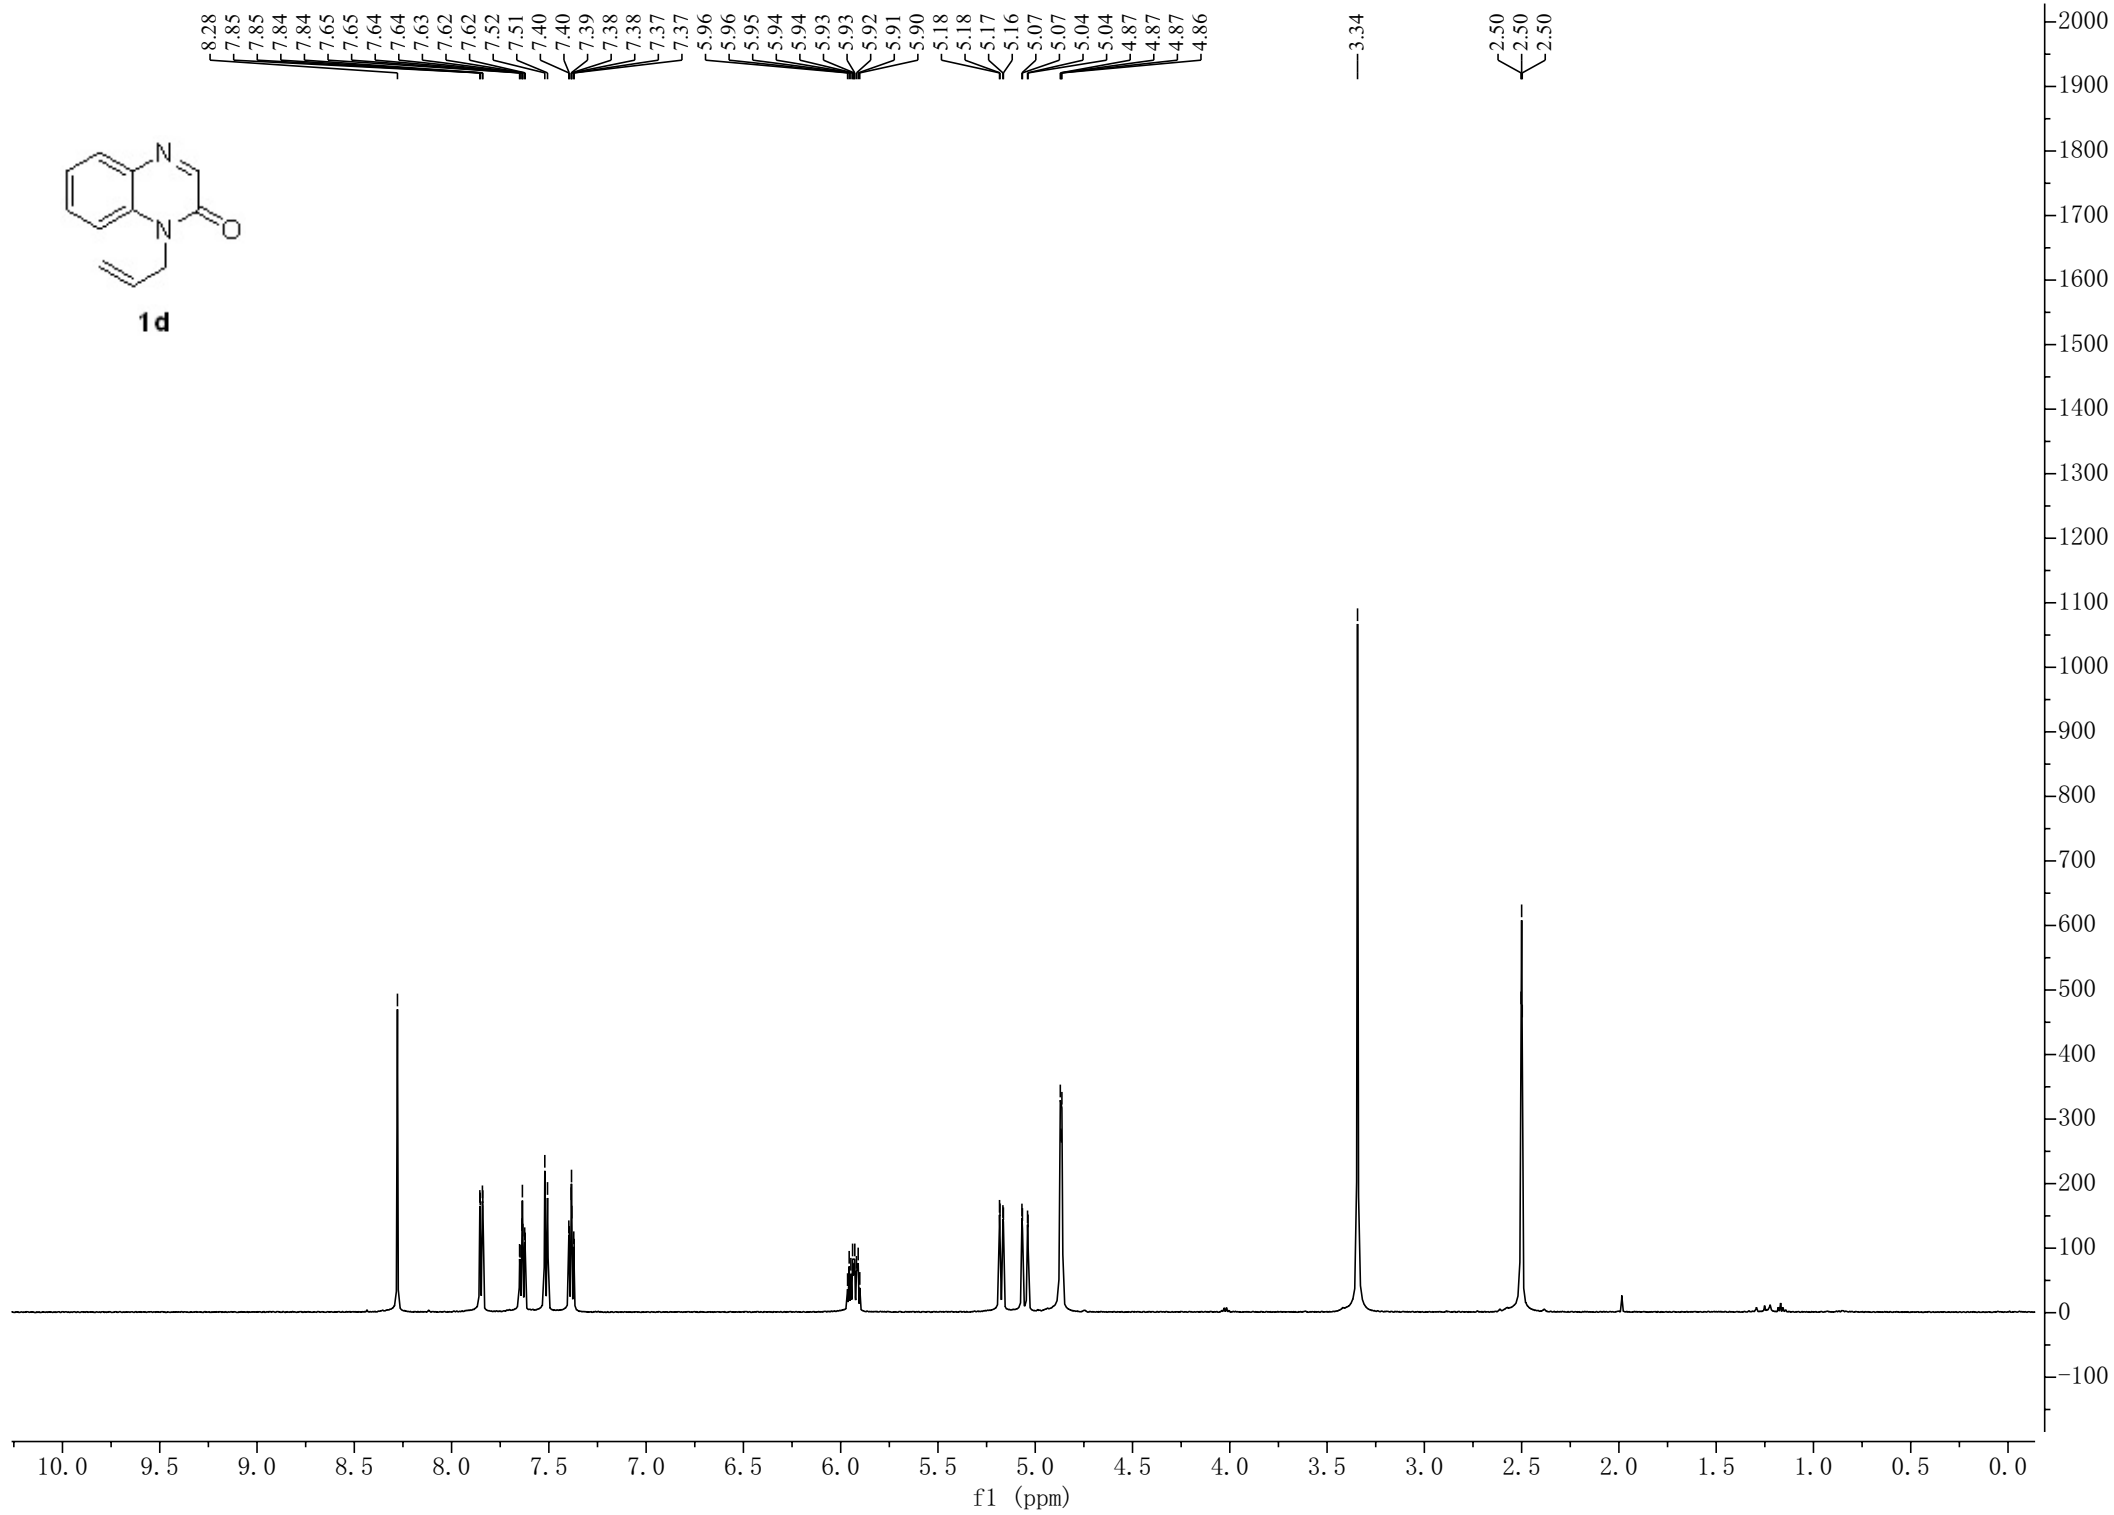

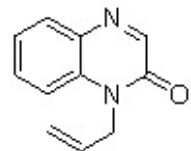

**1d**

— 153.96  
 — 150.20  
 { 132.85  
 { 132.20  
 { 131.43  
 { 131.01  
 { 129.75  
 — 123.52  
 { 117.11  
 { 115.20

— 43.36

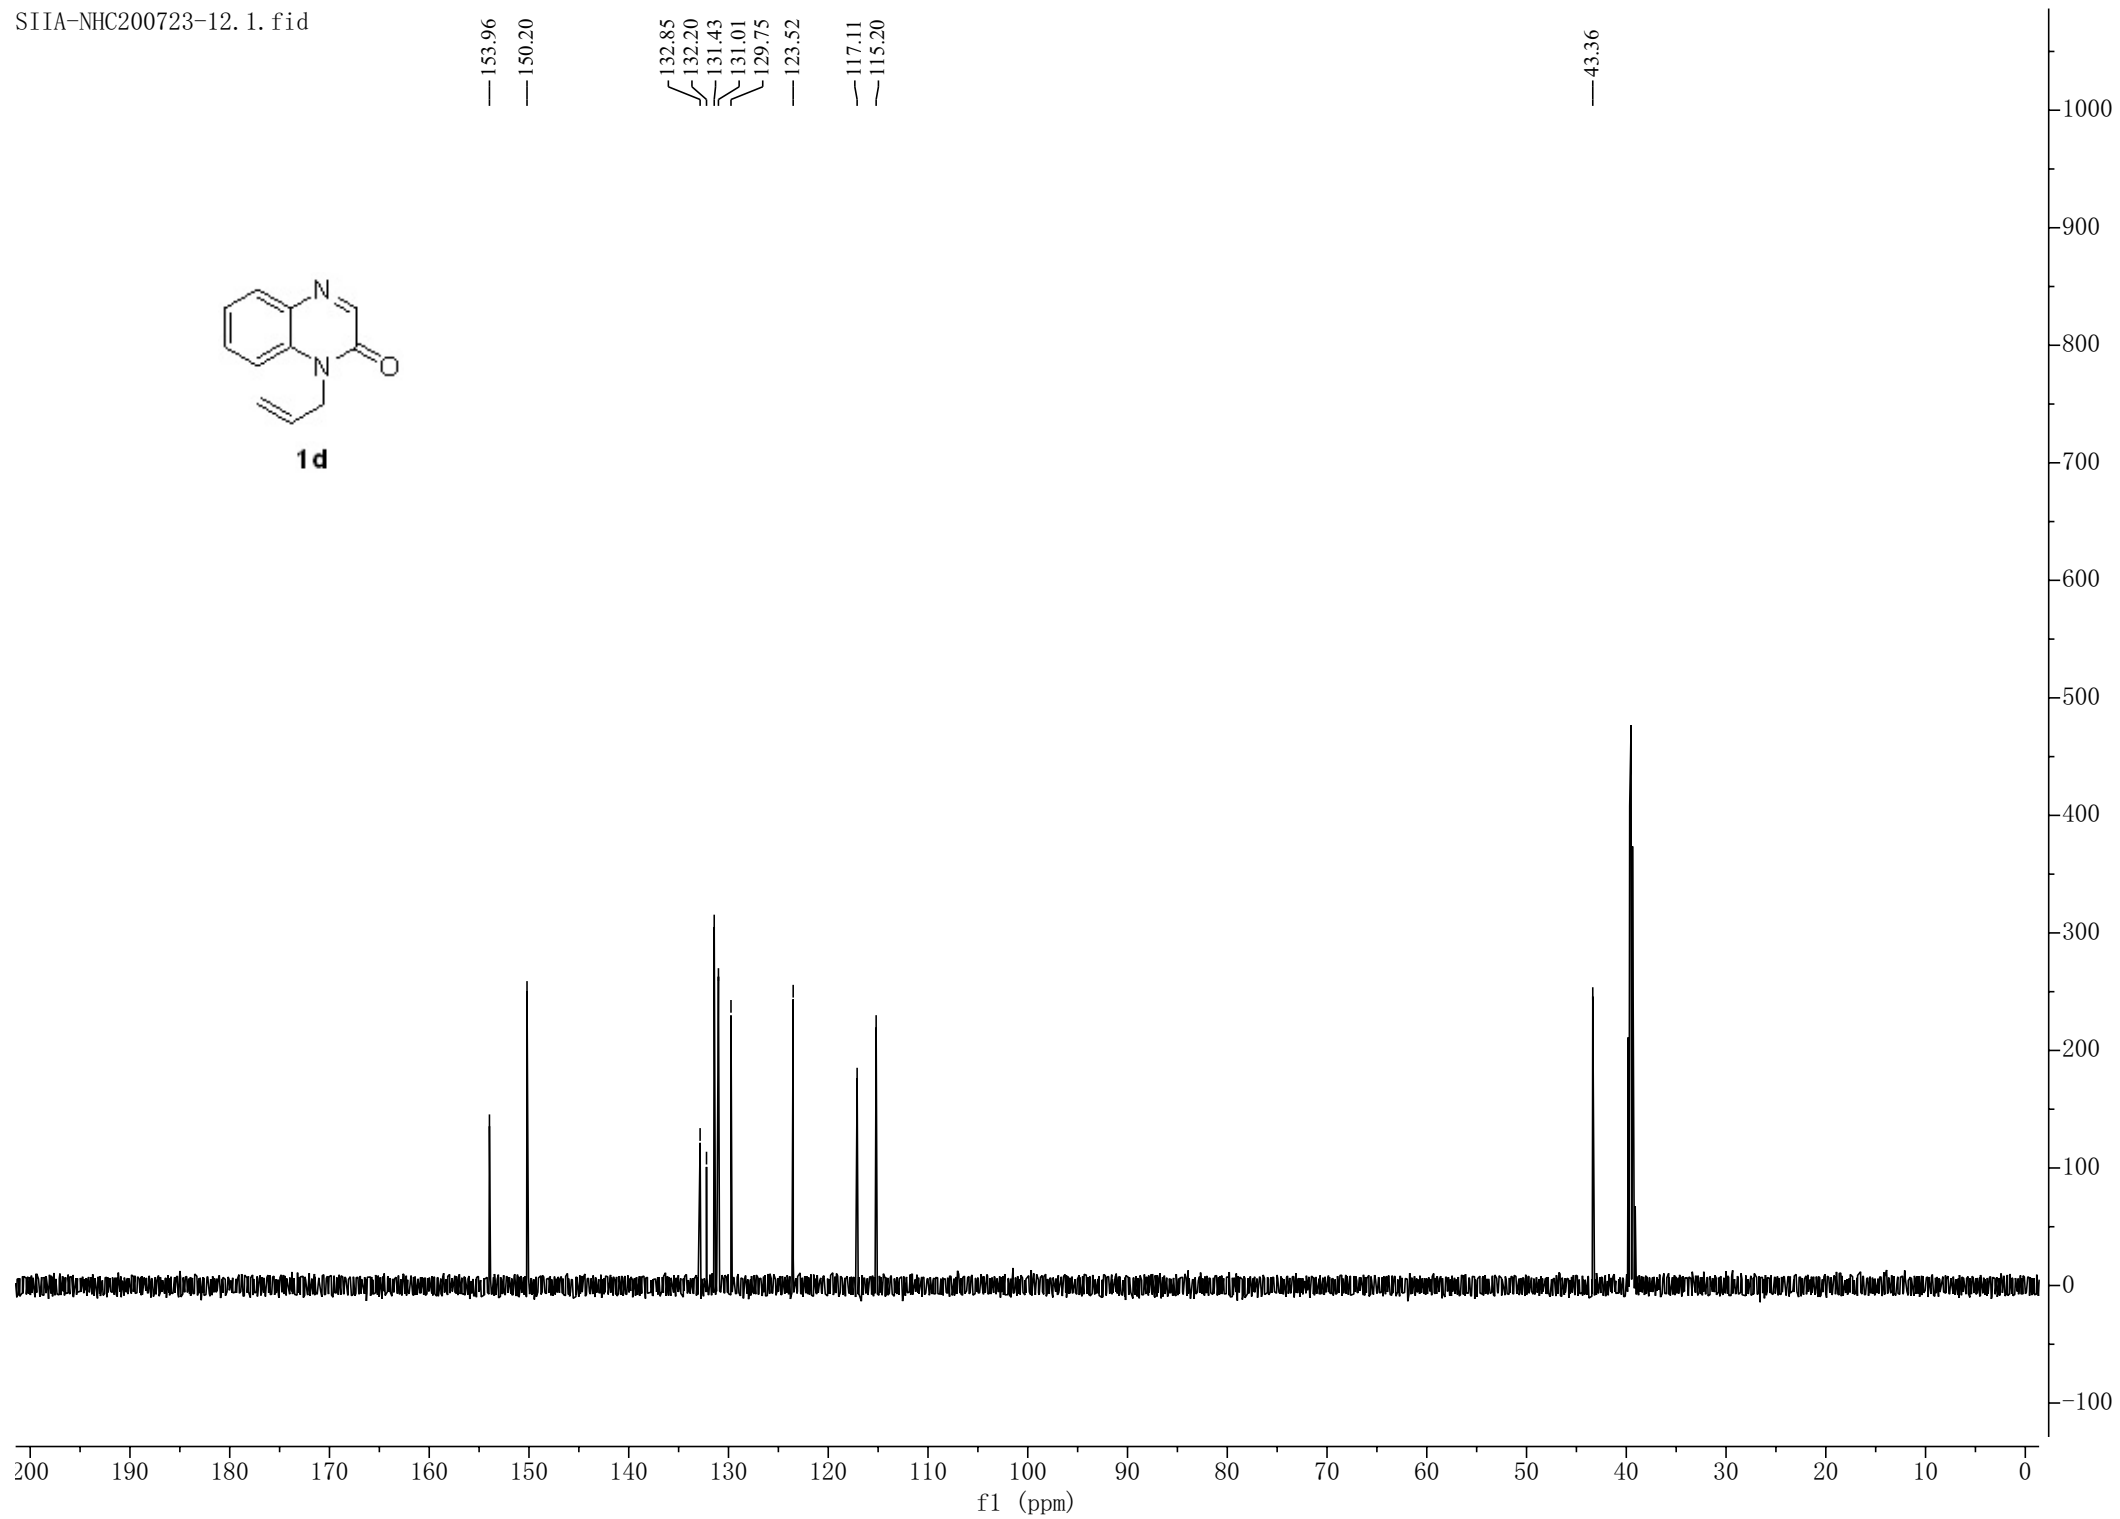

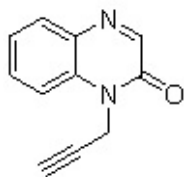

**1e**

8.29  
7.88  
7.86  
7.73  
7.72  
7.71  
7.65  
7.64  
7.45  
7.43  
7.42

5.07  
5.07

3.36  
3.36  
3.35  
3.34

2.50  
2.50

0.87  
1.00  
1.06  
1.07  
1.05

2.13

0.96

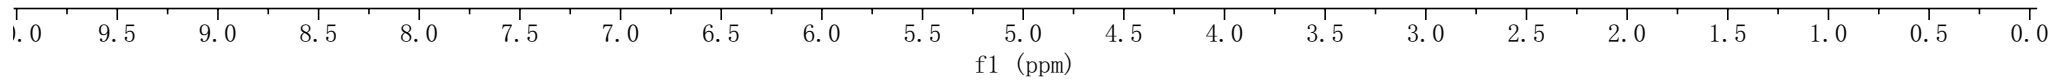

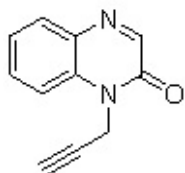

**1e**

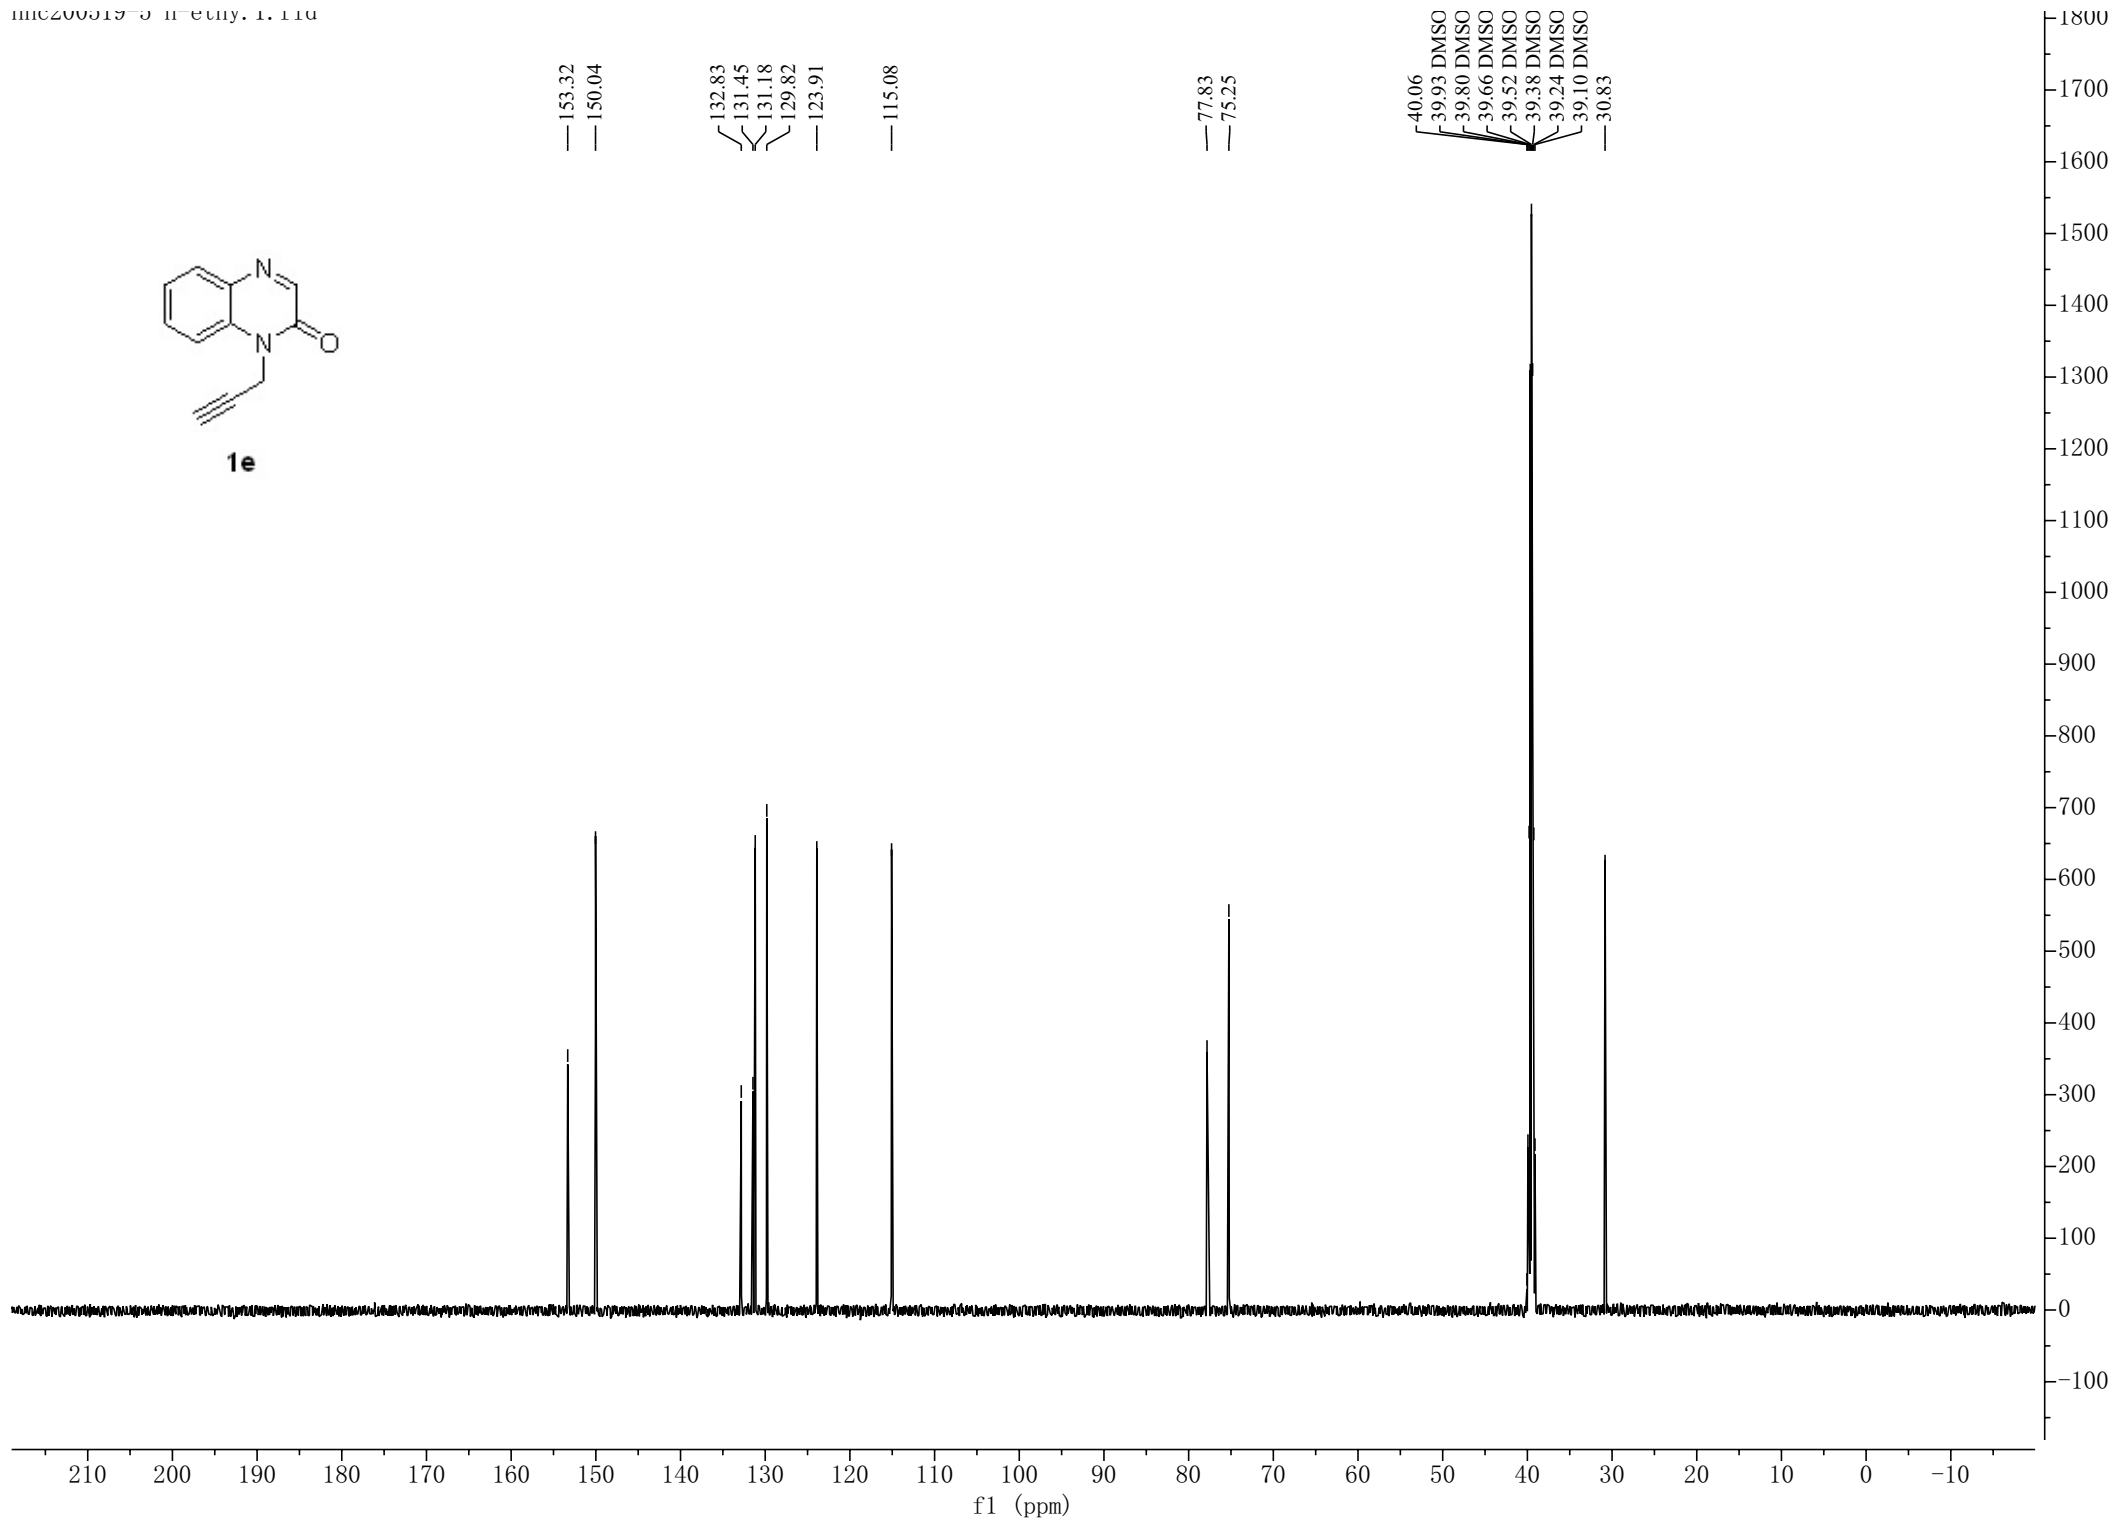

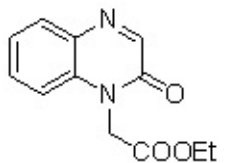

**1g**  
**1f**

8.32  
7.89  
7.89  
7.87  
7.87  
7.67  
7.65  
7.65  
7.64  
7.64  
7.56  
7.54  
7.43  
7.43  
7.42  
7.42  
7.41  
7.40

5.10  
4.19  
4.18  
4.16  
4.15

2.50  
2.50

1.23  
1.21  
1.20

0.86  
1.00  
1.05  
1.06  
1.07

2.15

2.17

3.33

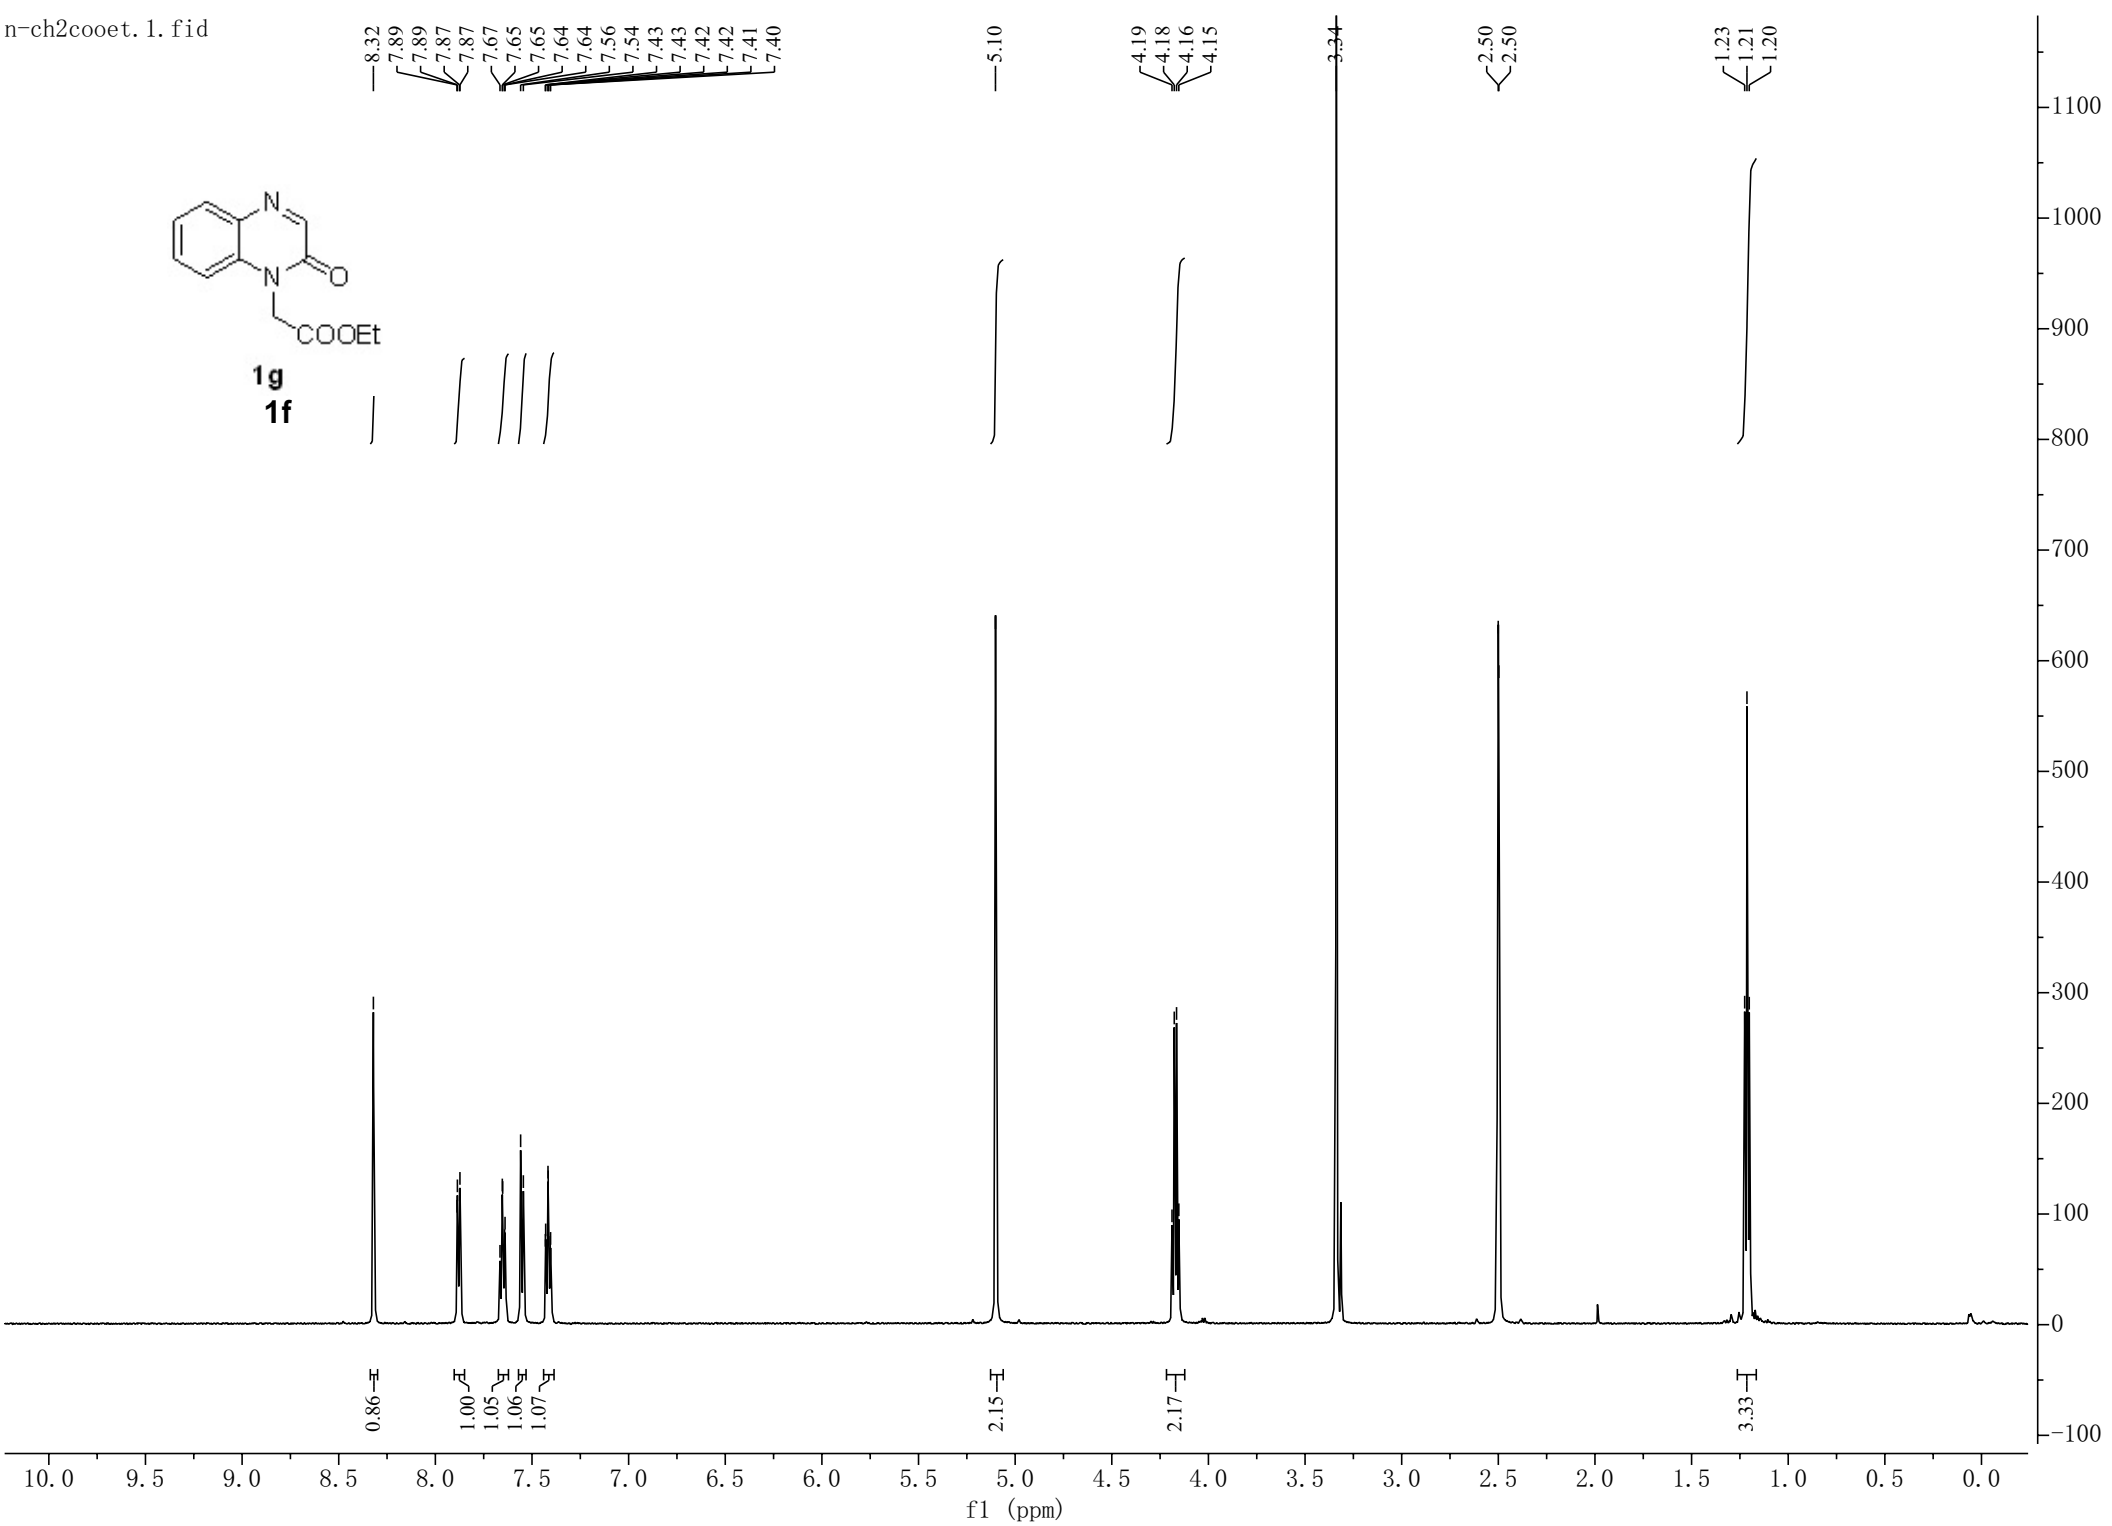

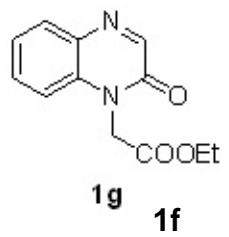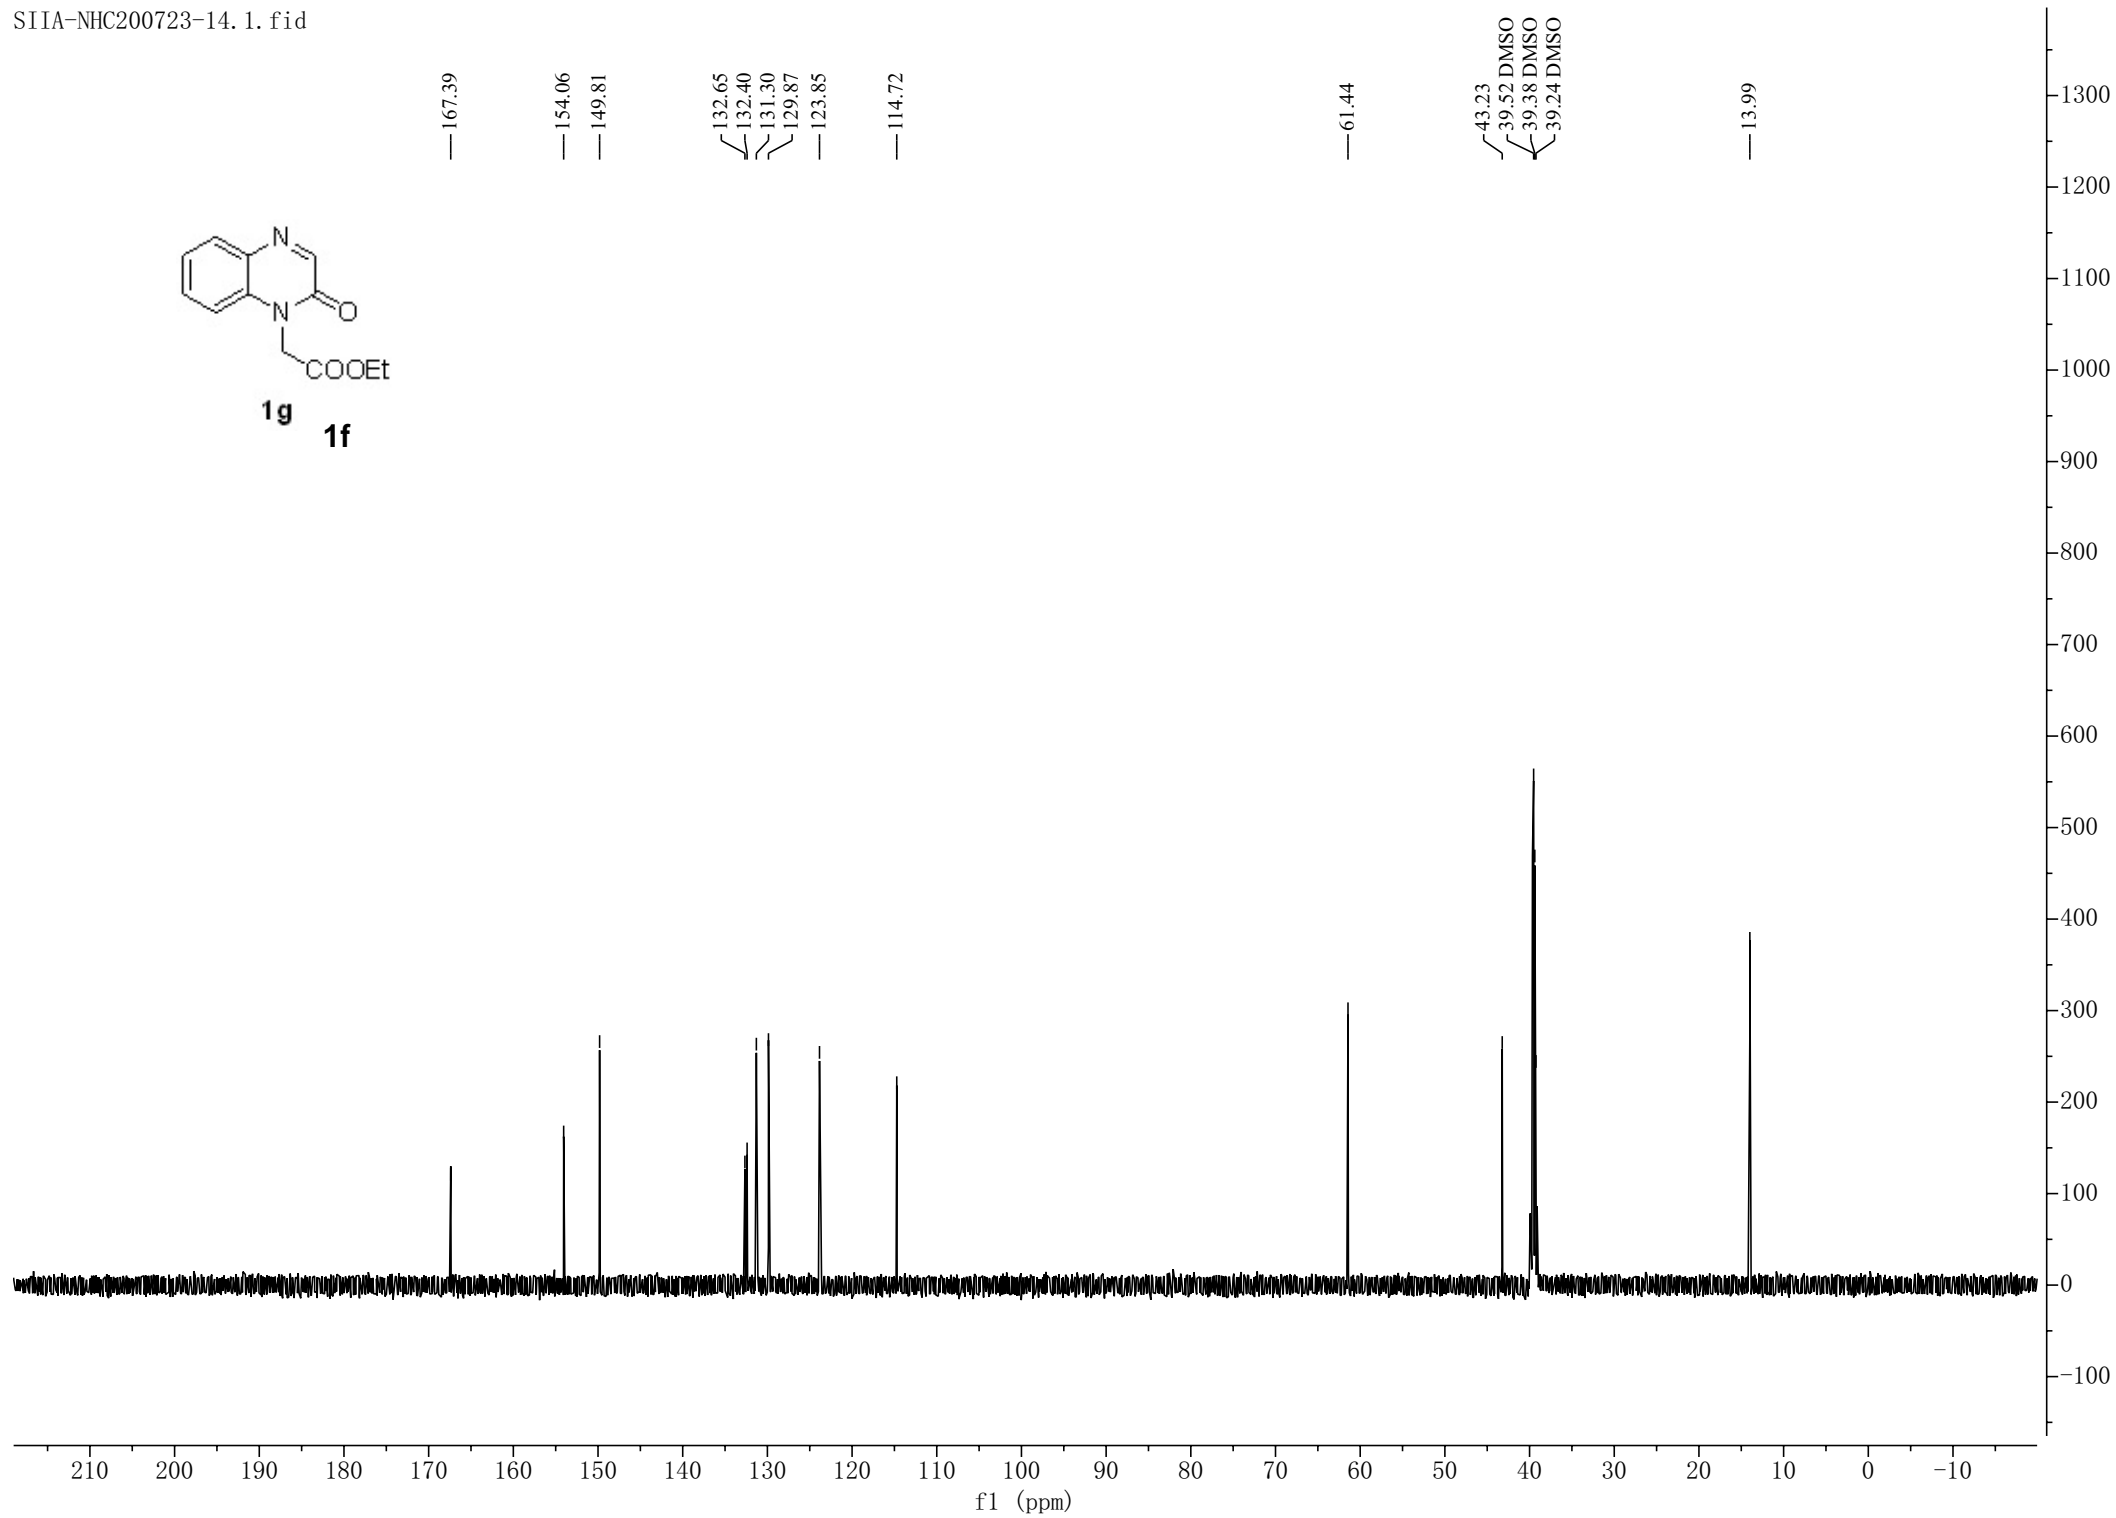



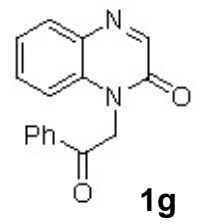

8.33  
8.16  
8.15  
7.94  
7.97  
7.90  
7.90  
7.78  
7.77  
7.75  
7.65  
7.64  
7.62  
7.61  
7.60  
7.59  
7.53  
7.51  
7.42  
7.41  
7.39

5.93

3.35

2.50  
2.50  
2.50

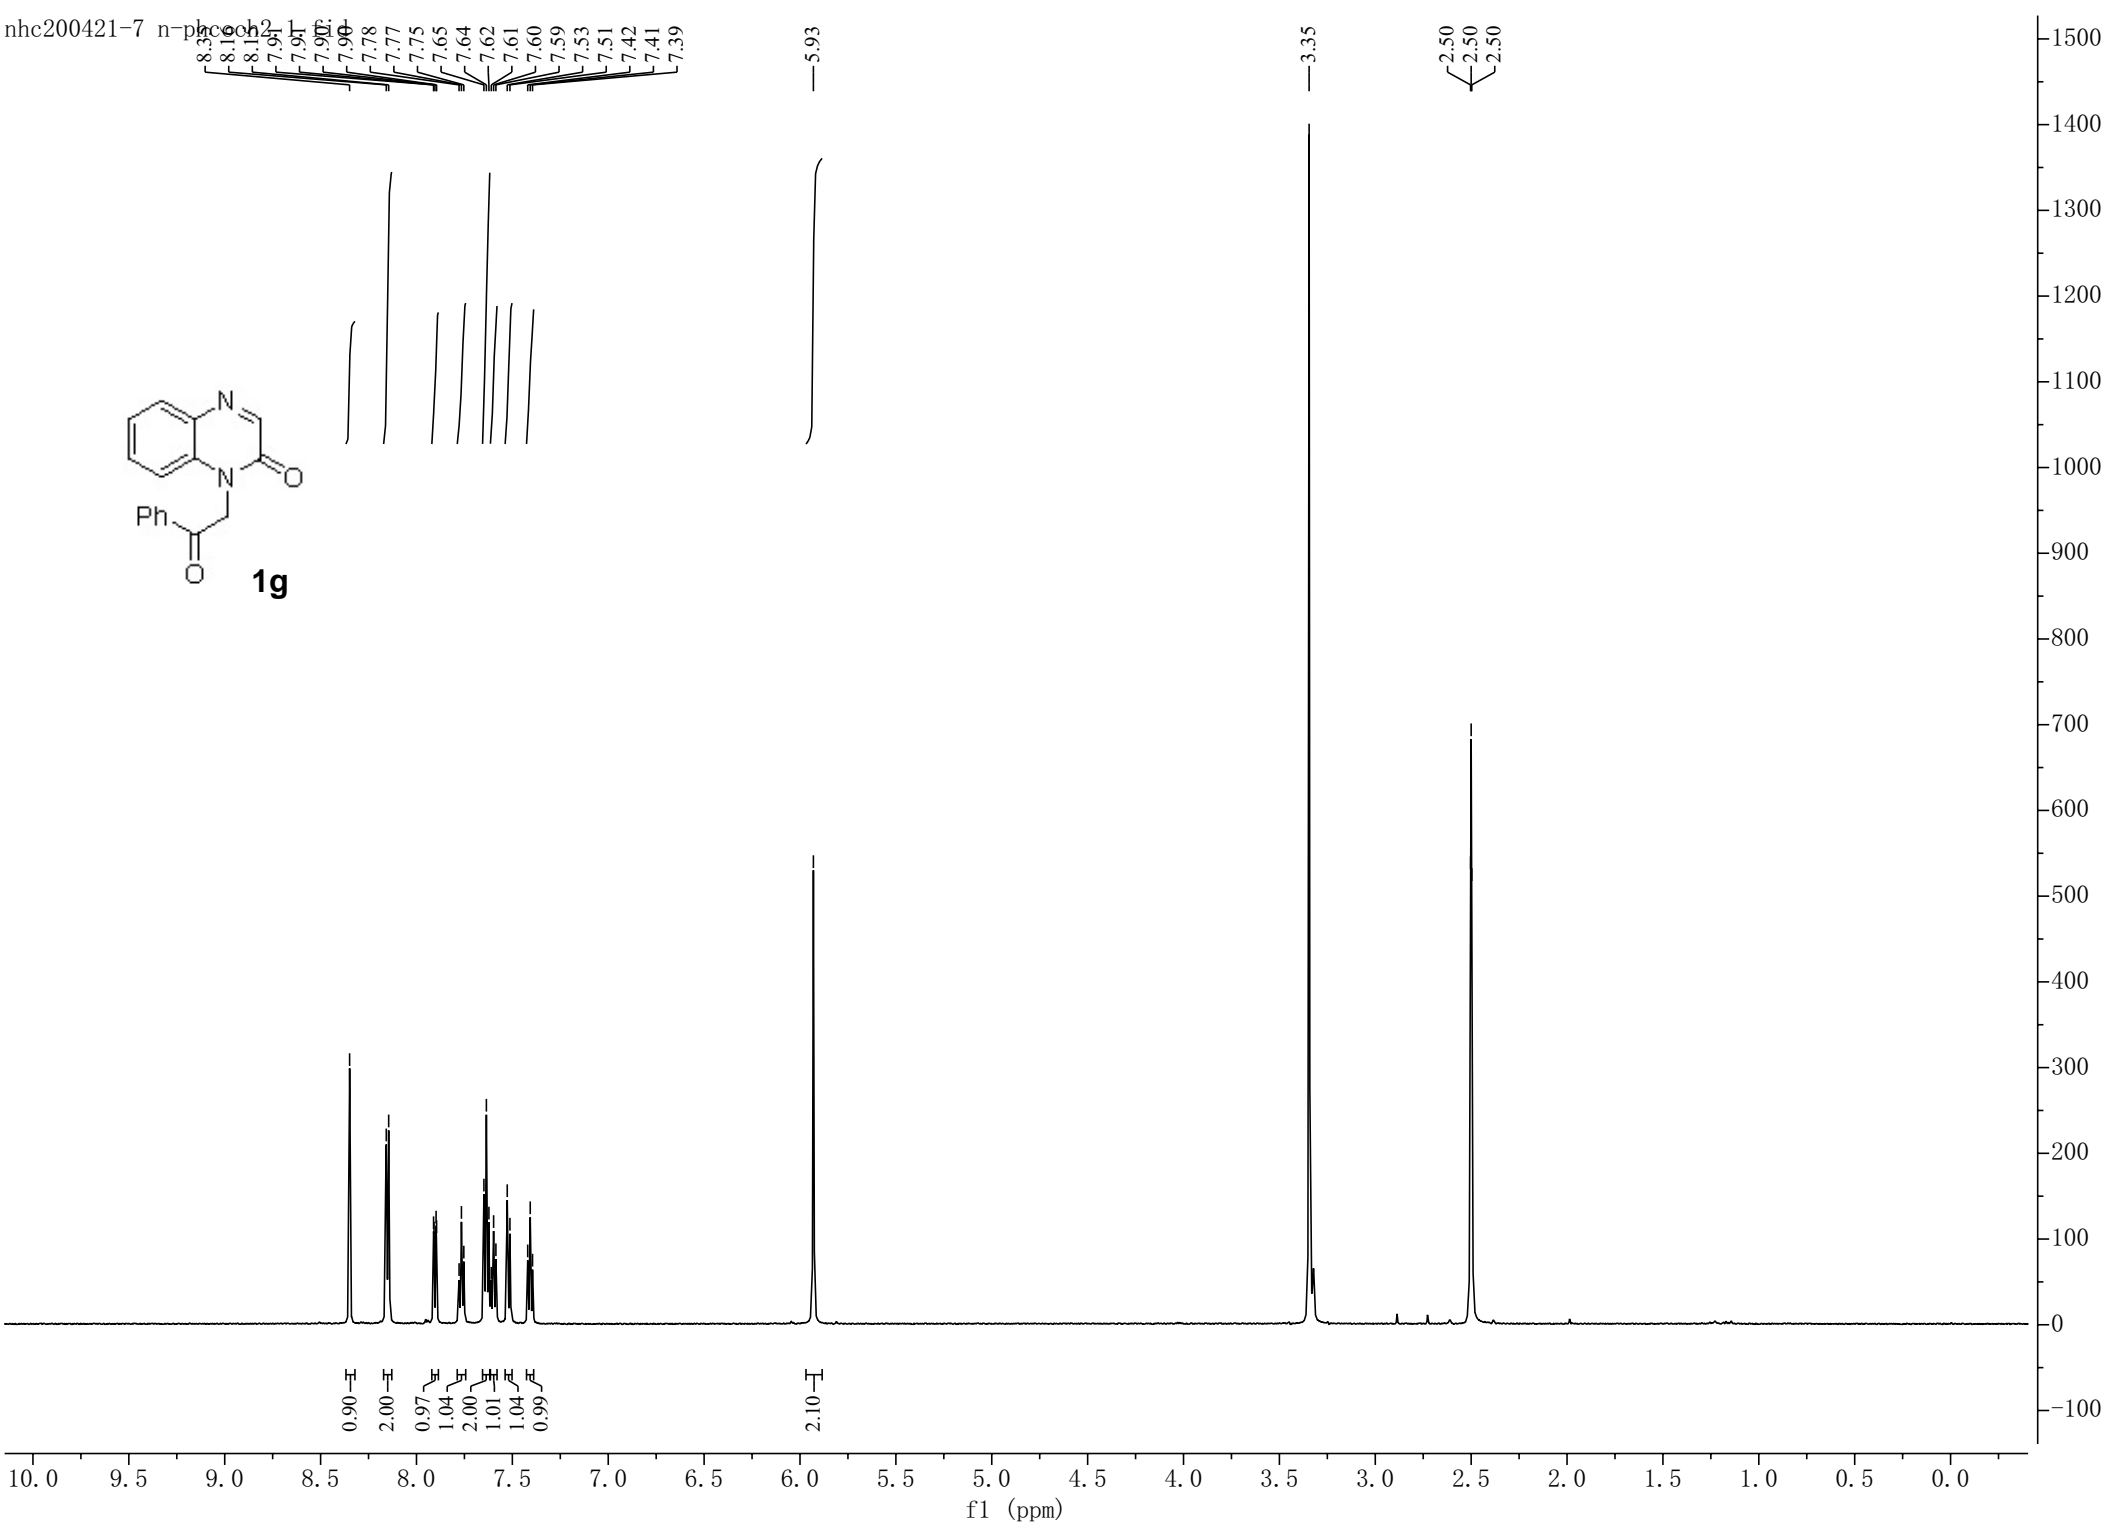

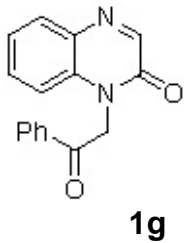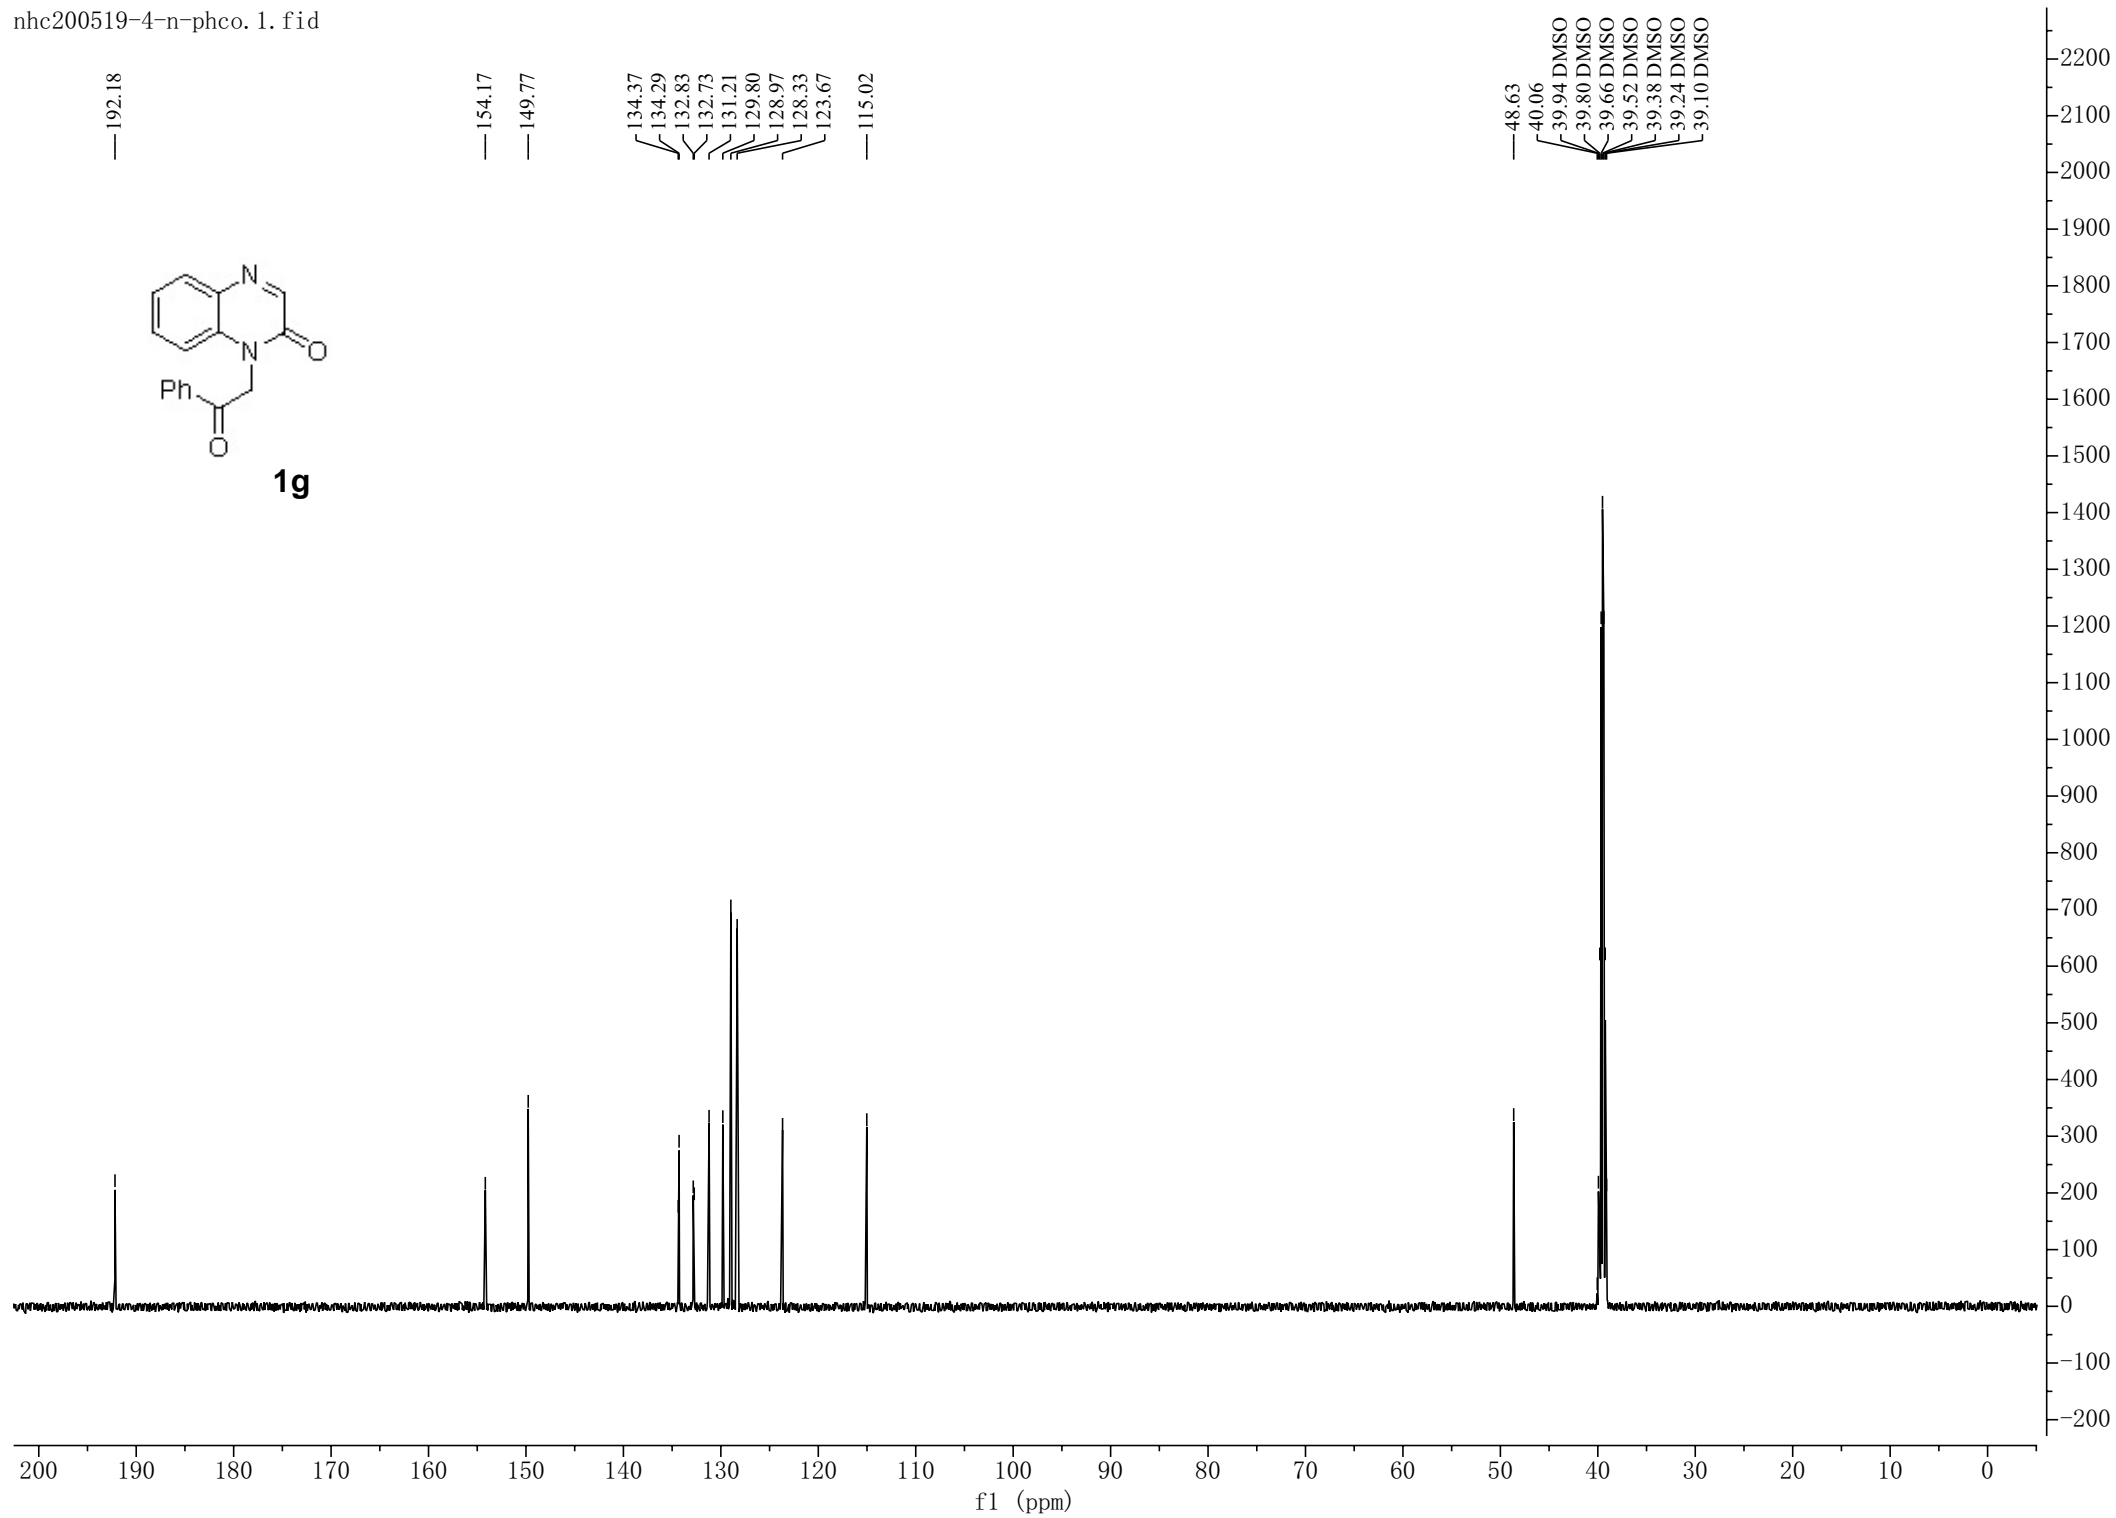

7, 8-me. 1. f1

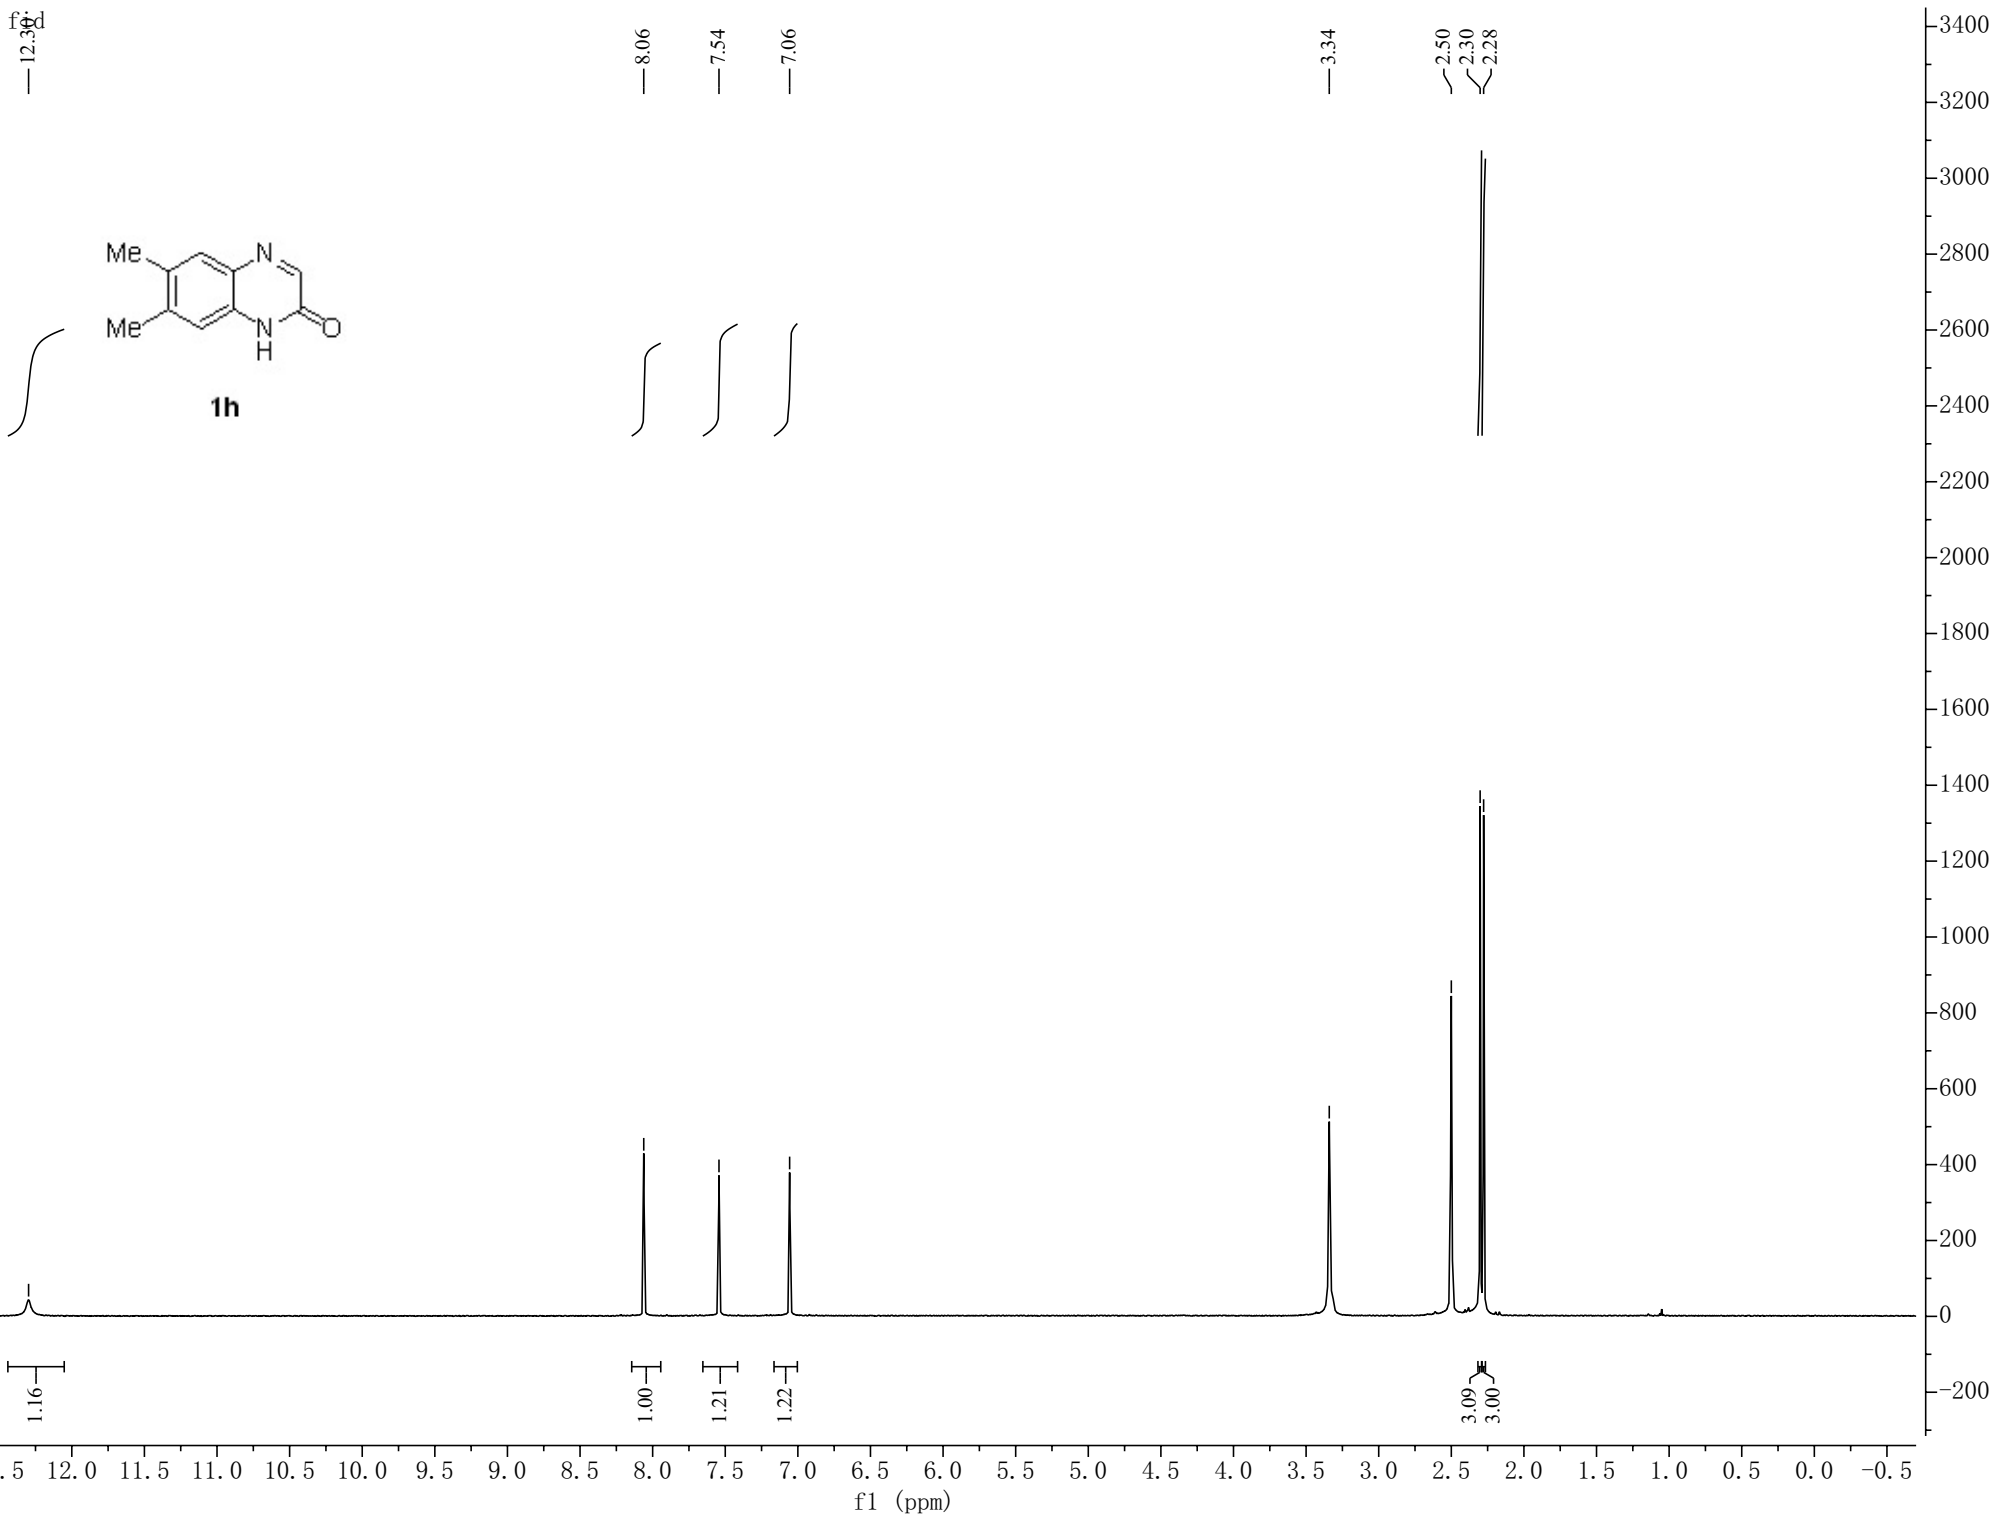

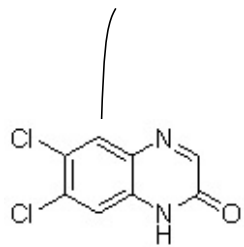

1i

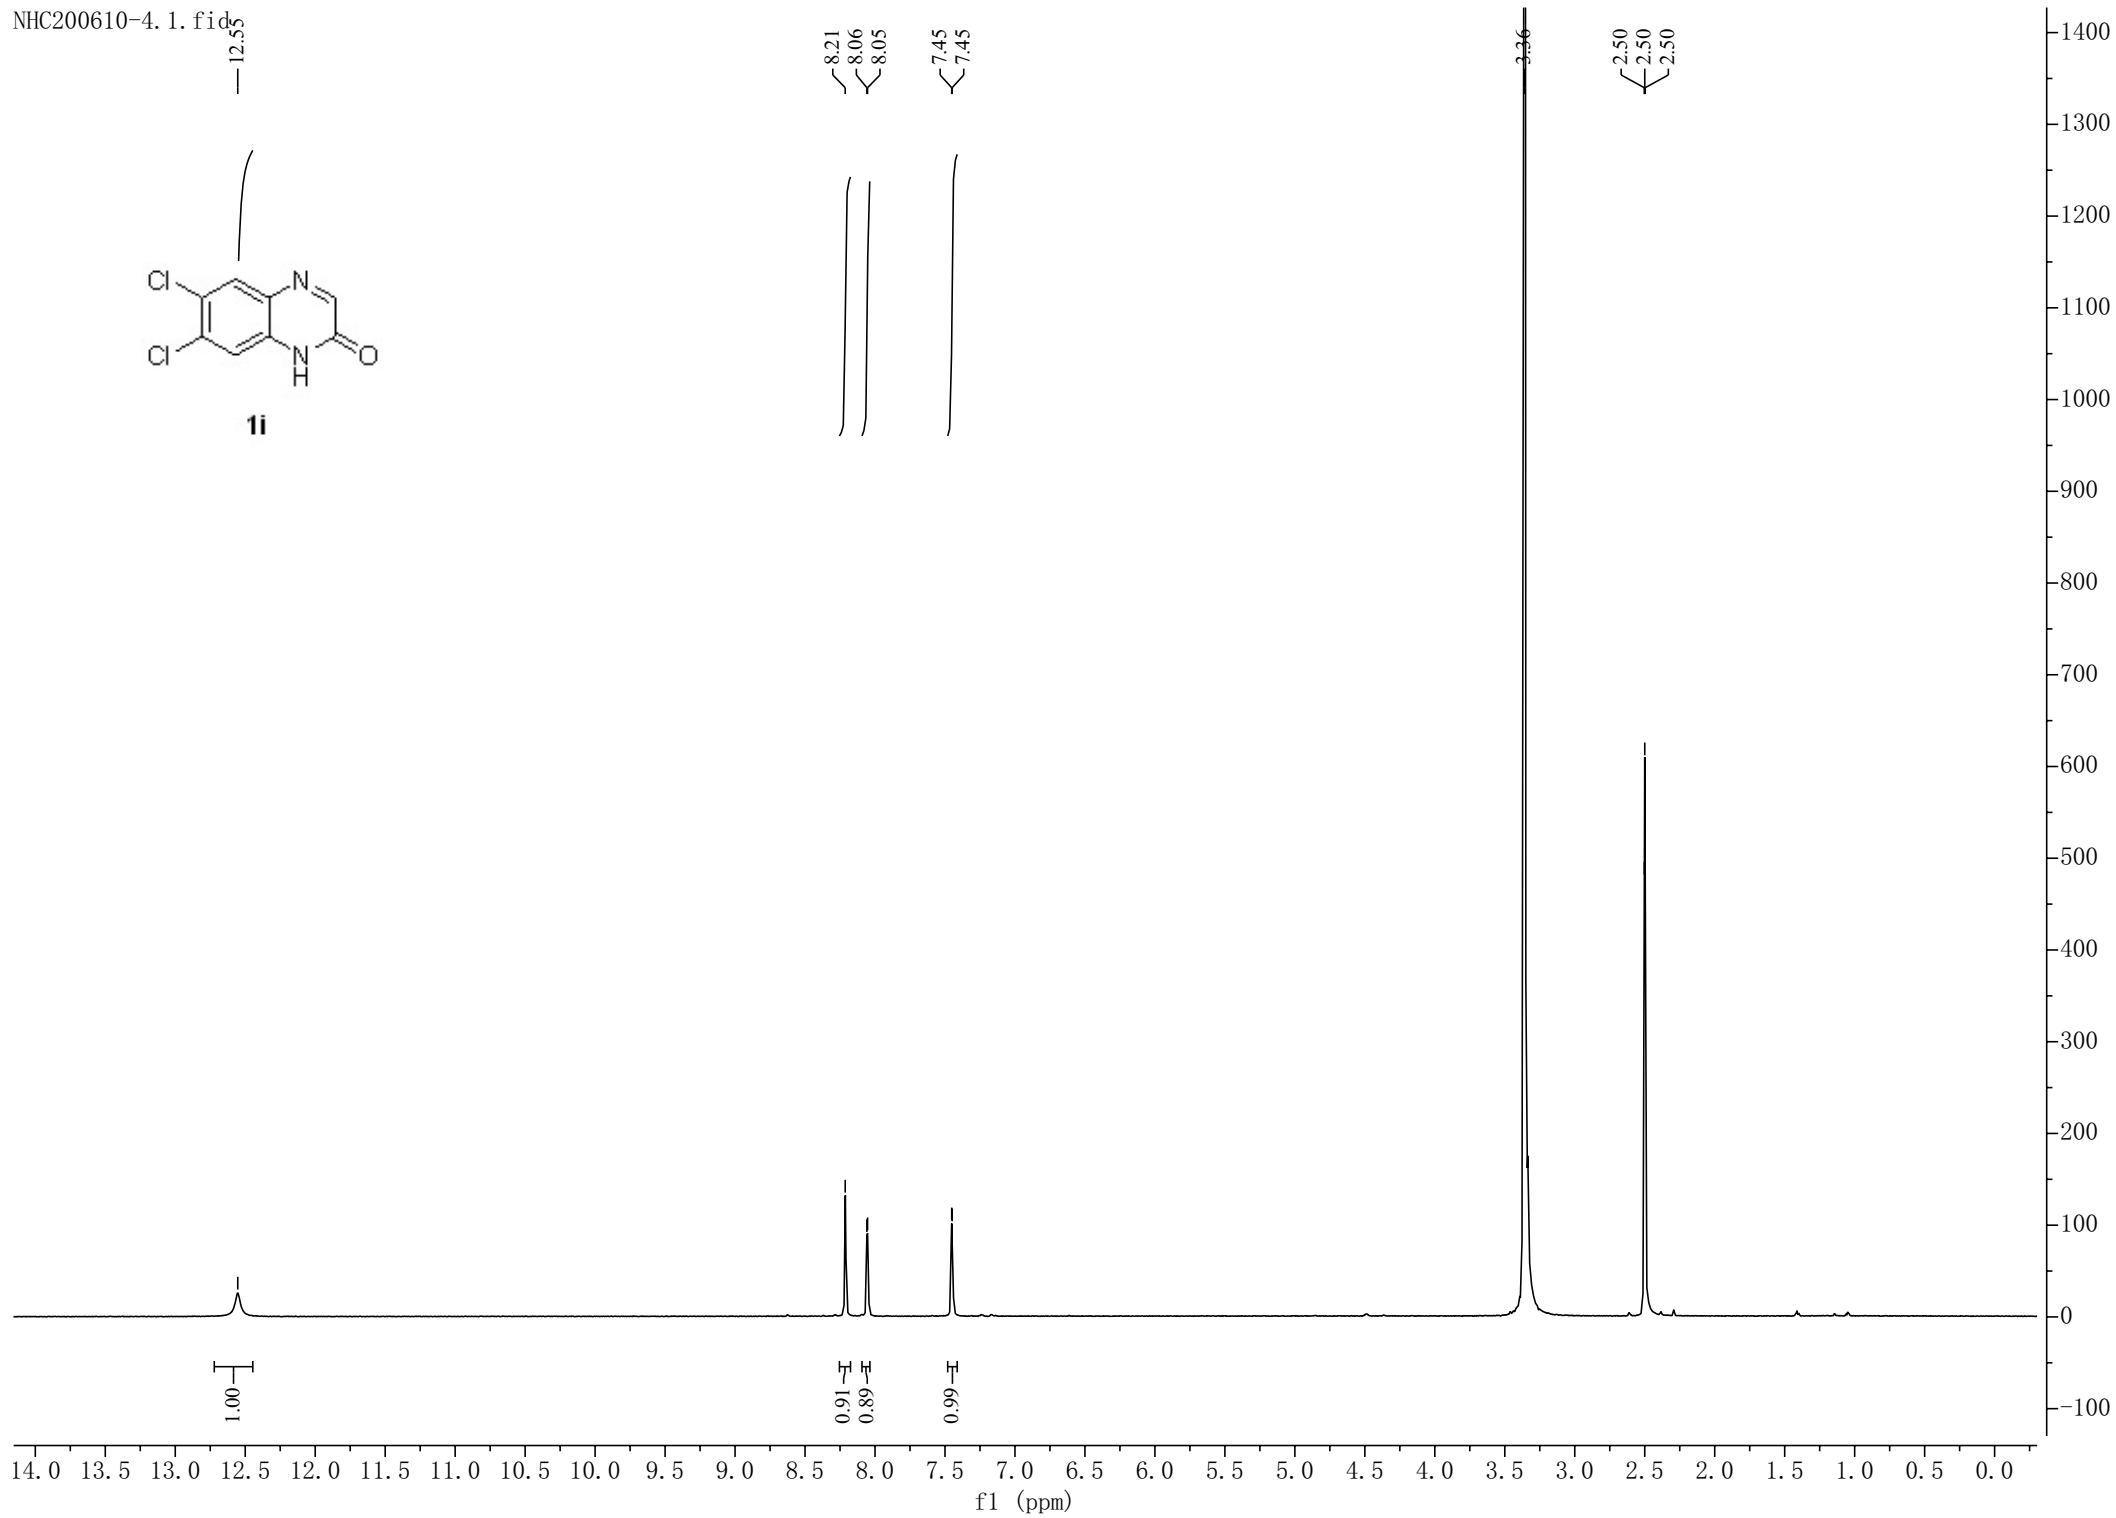

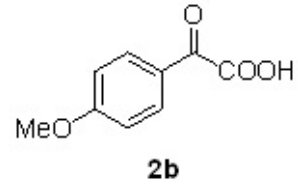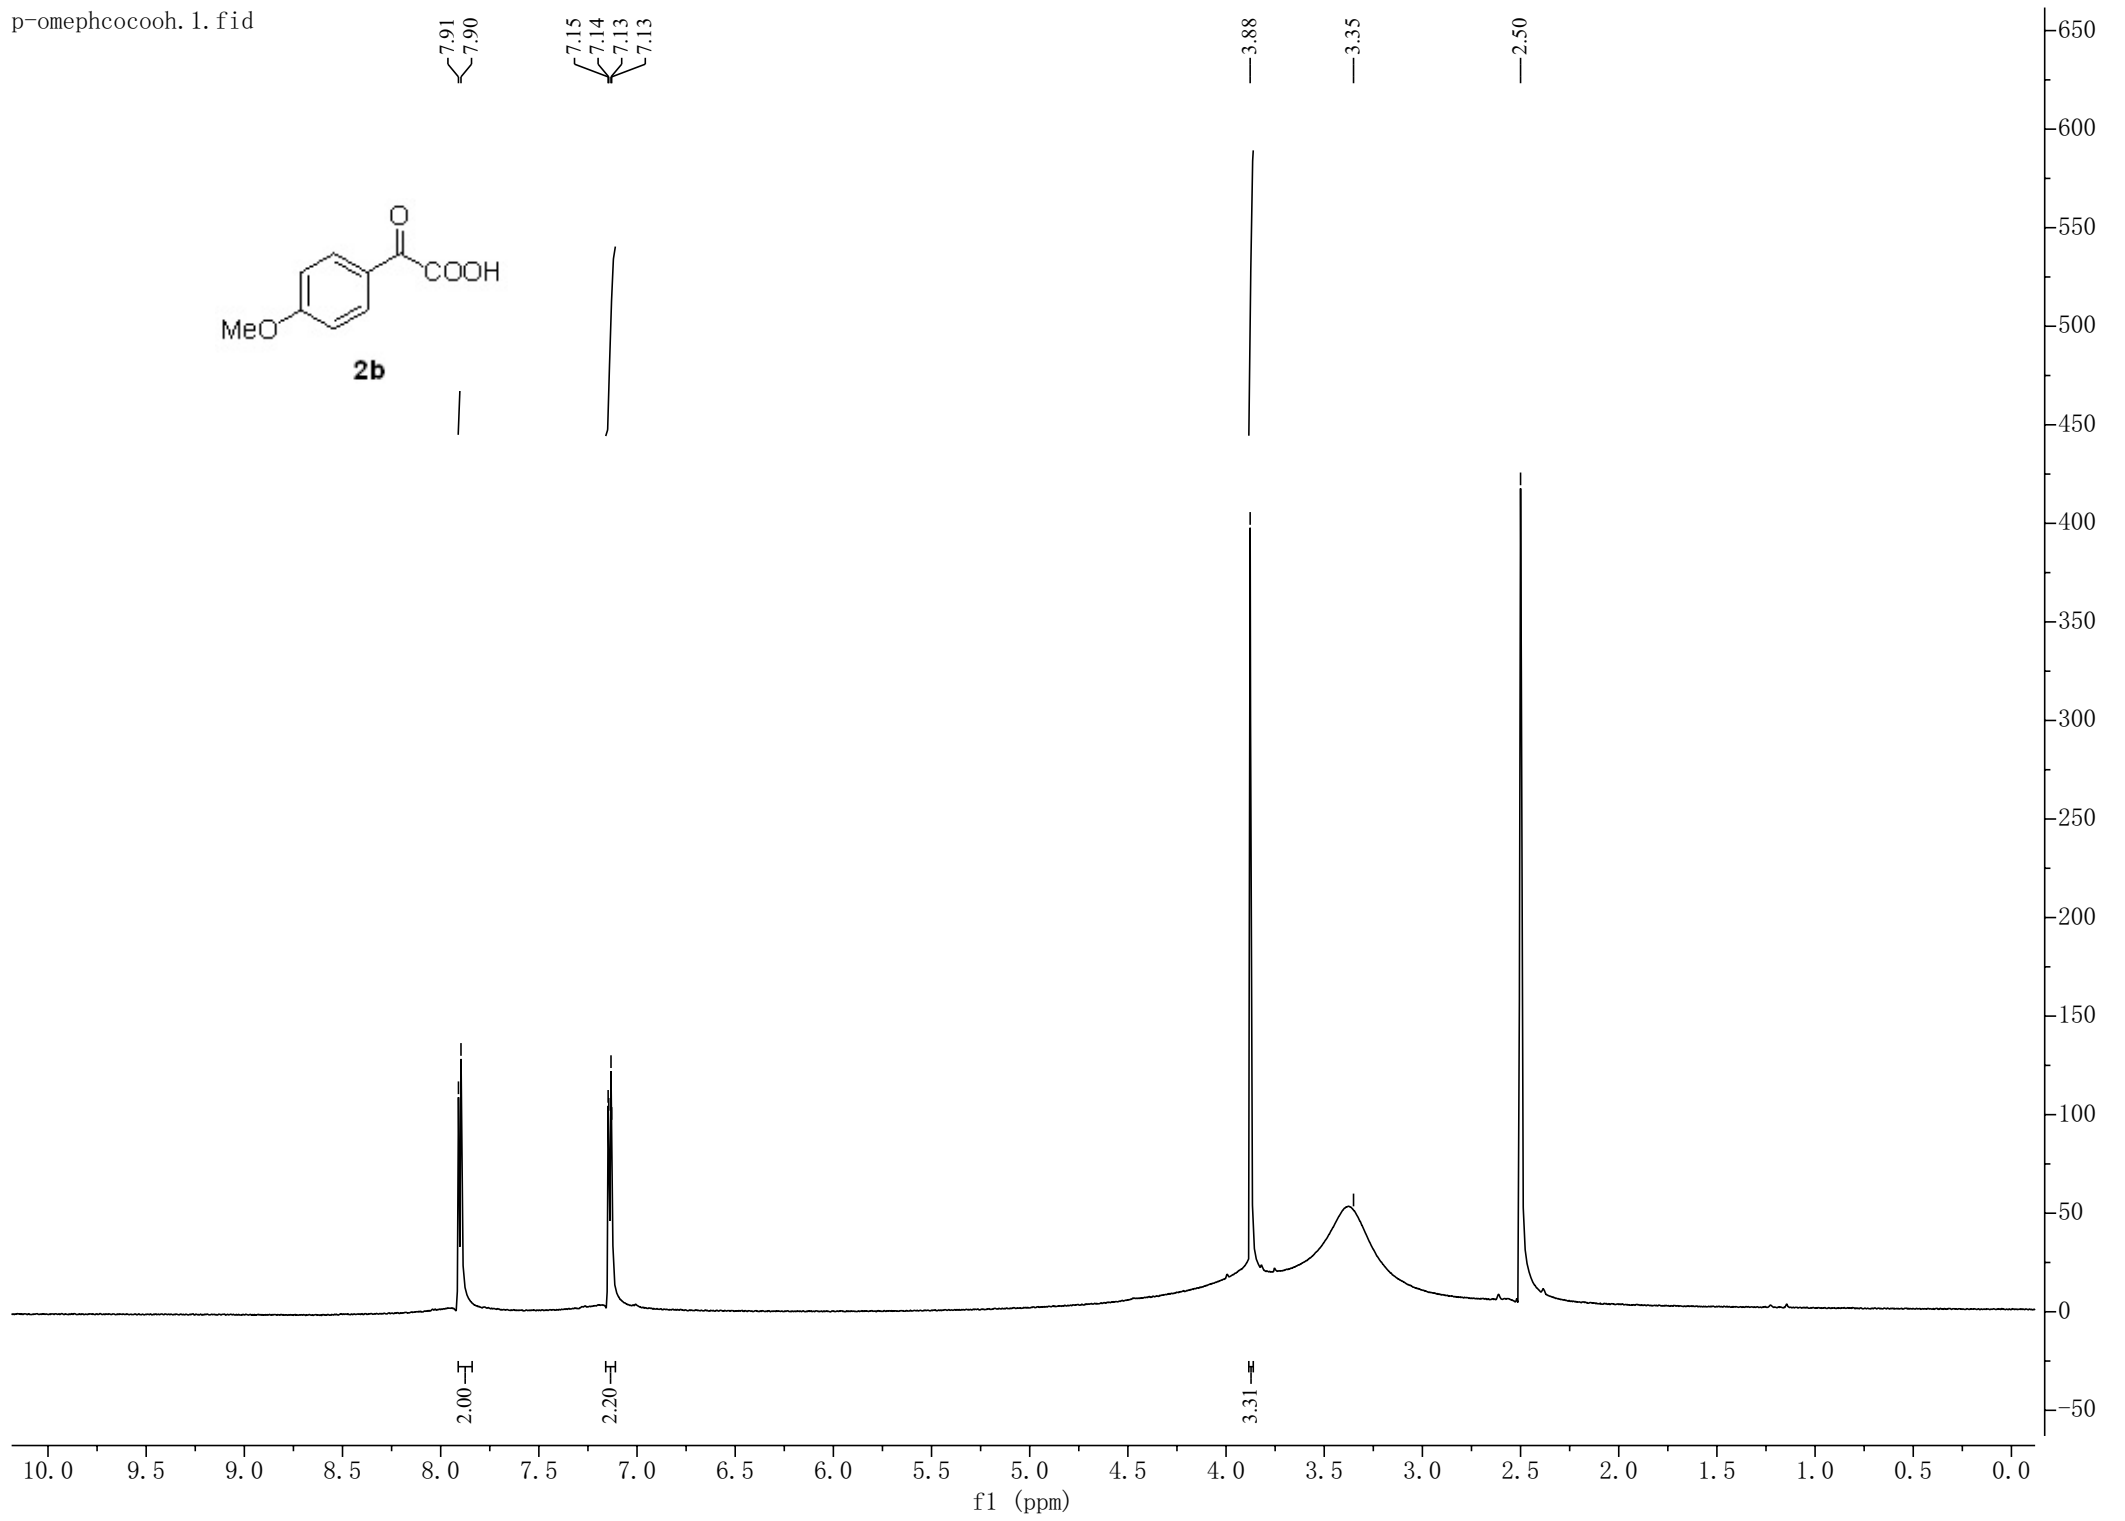

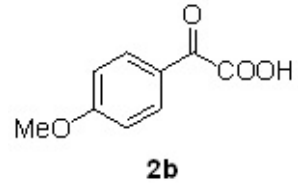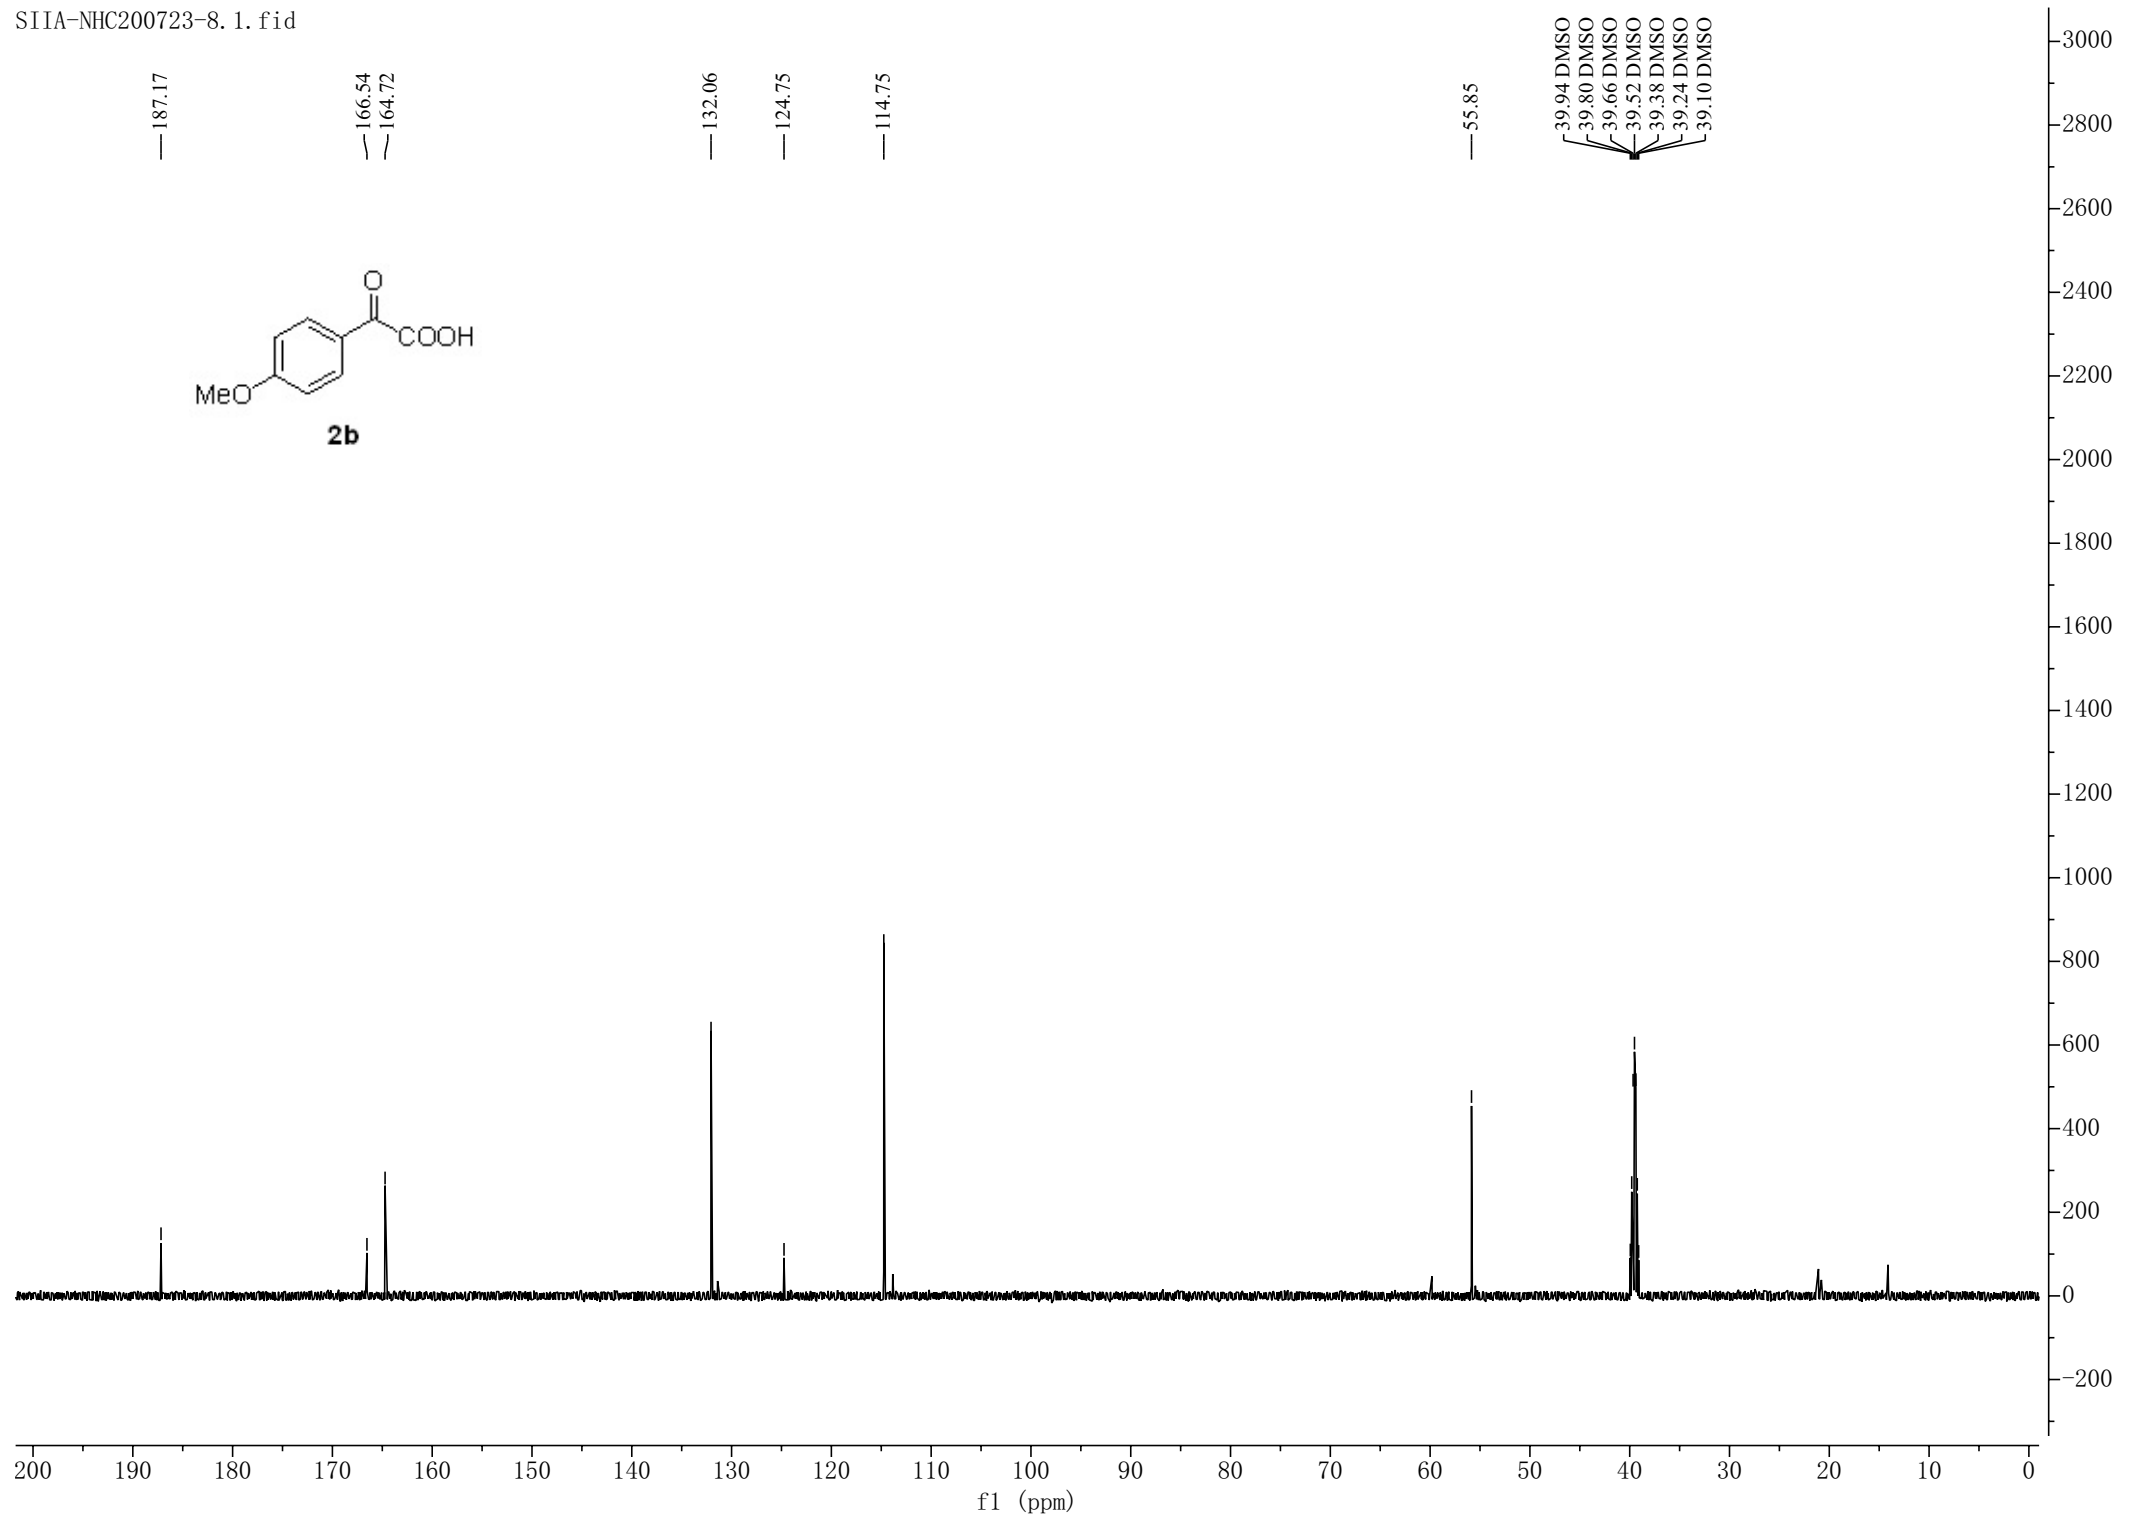

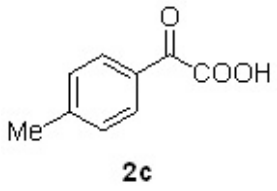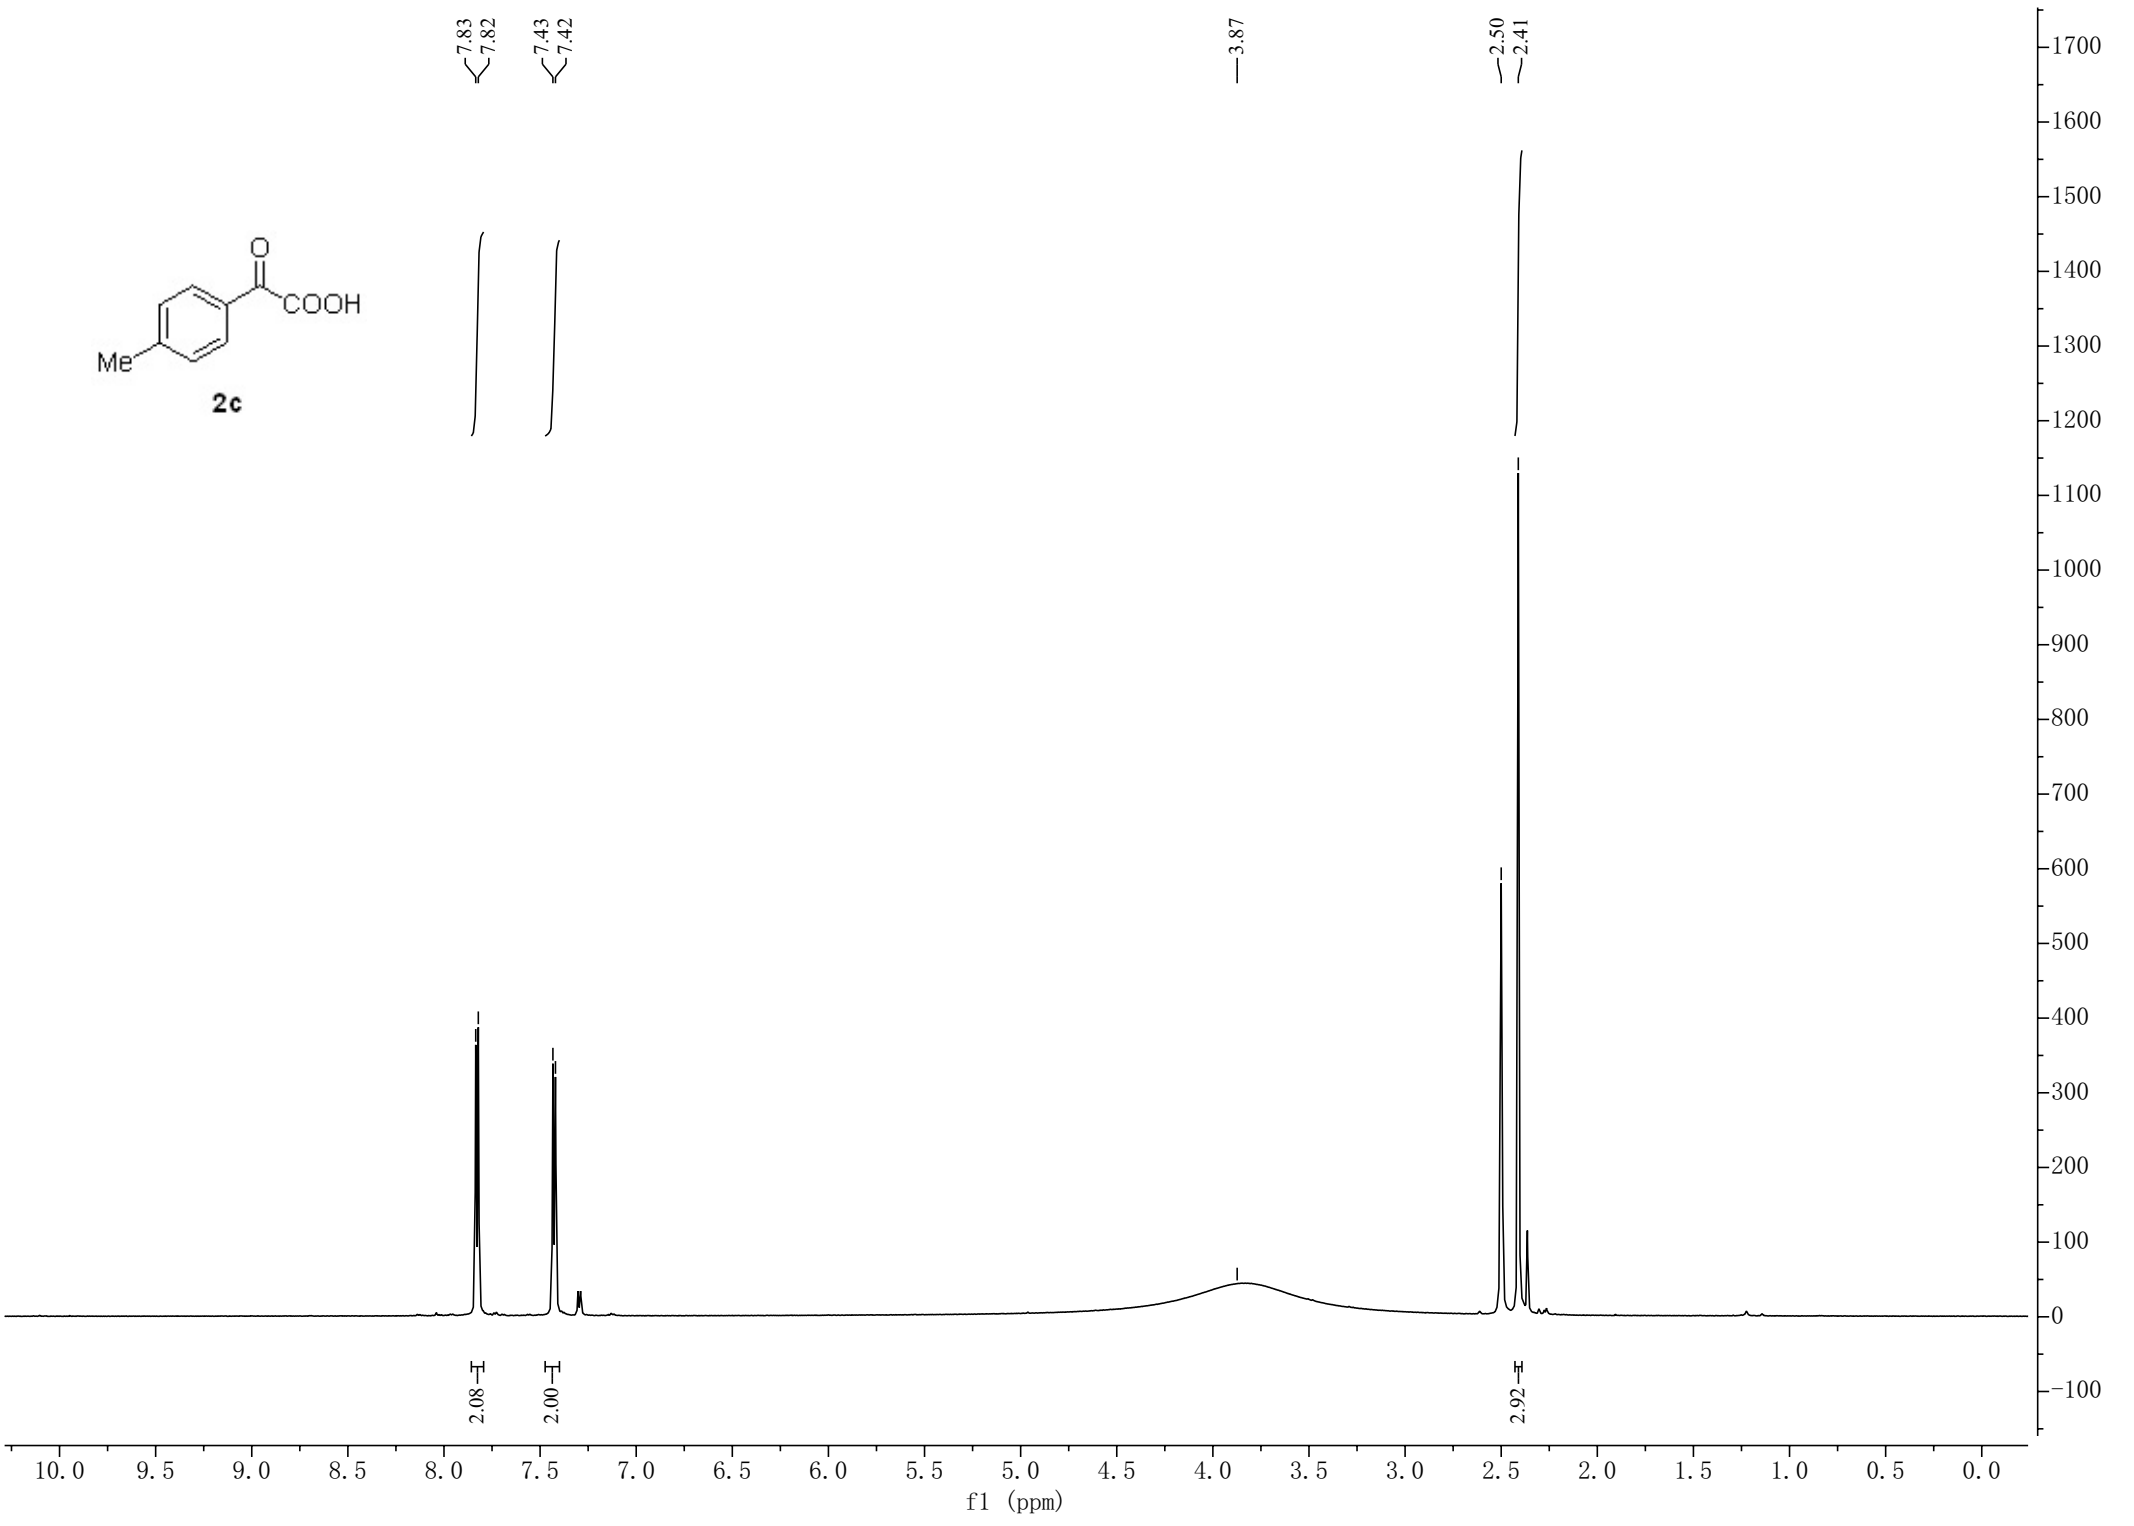

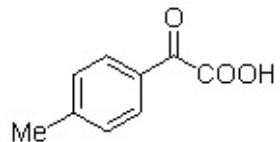

**2c**

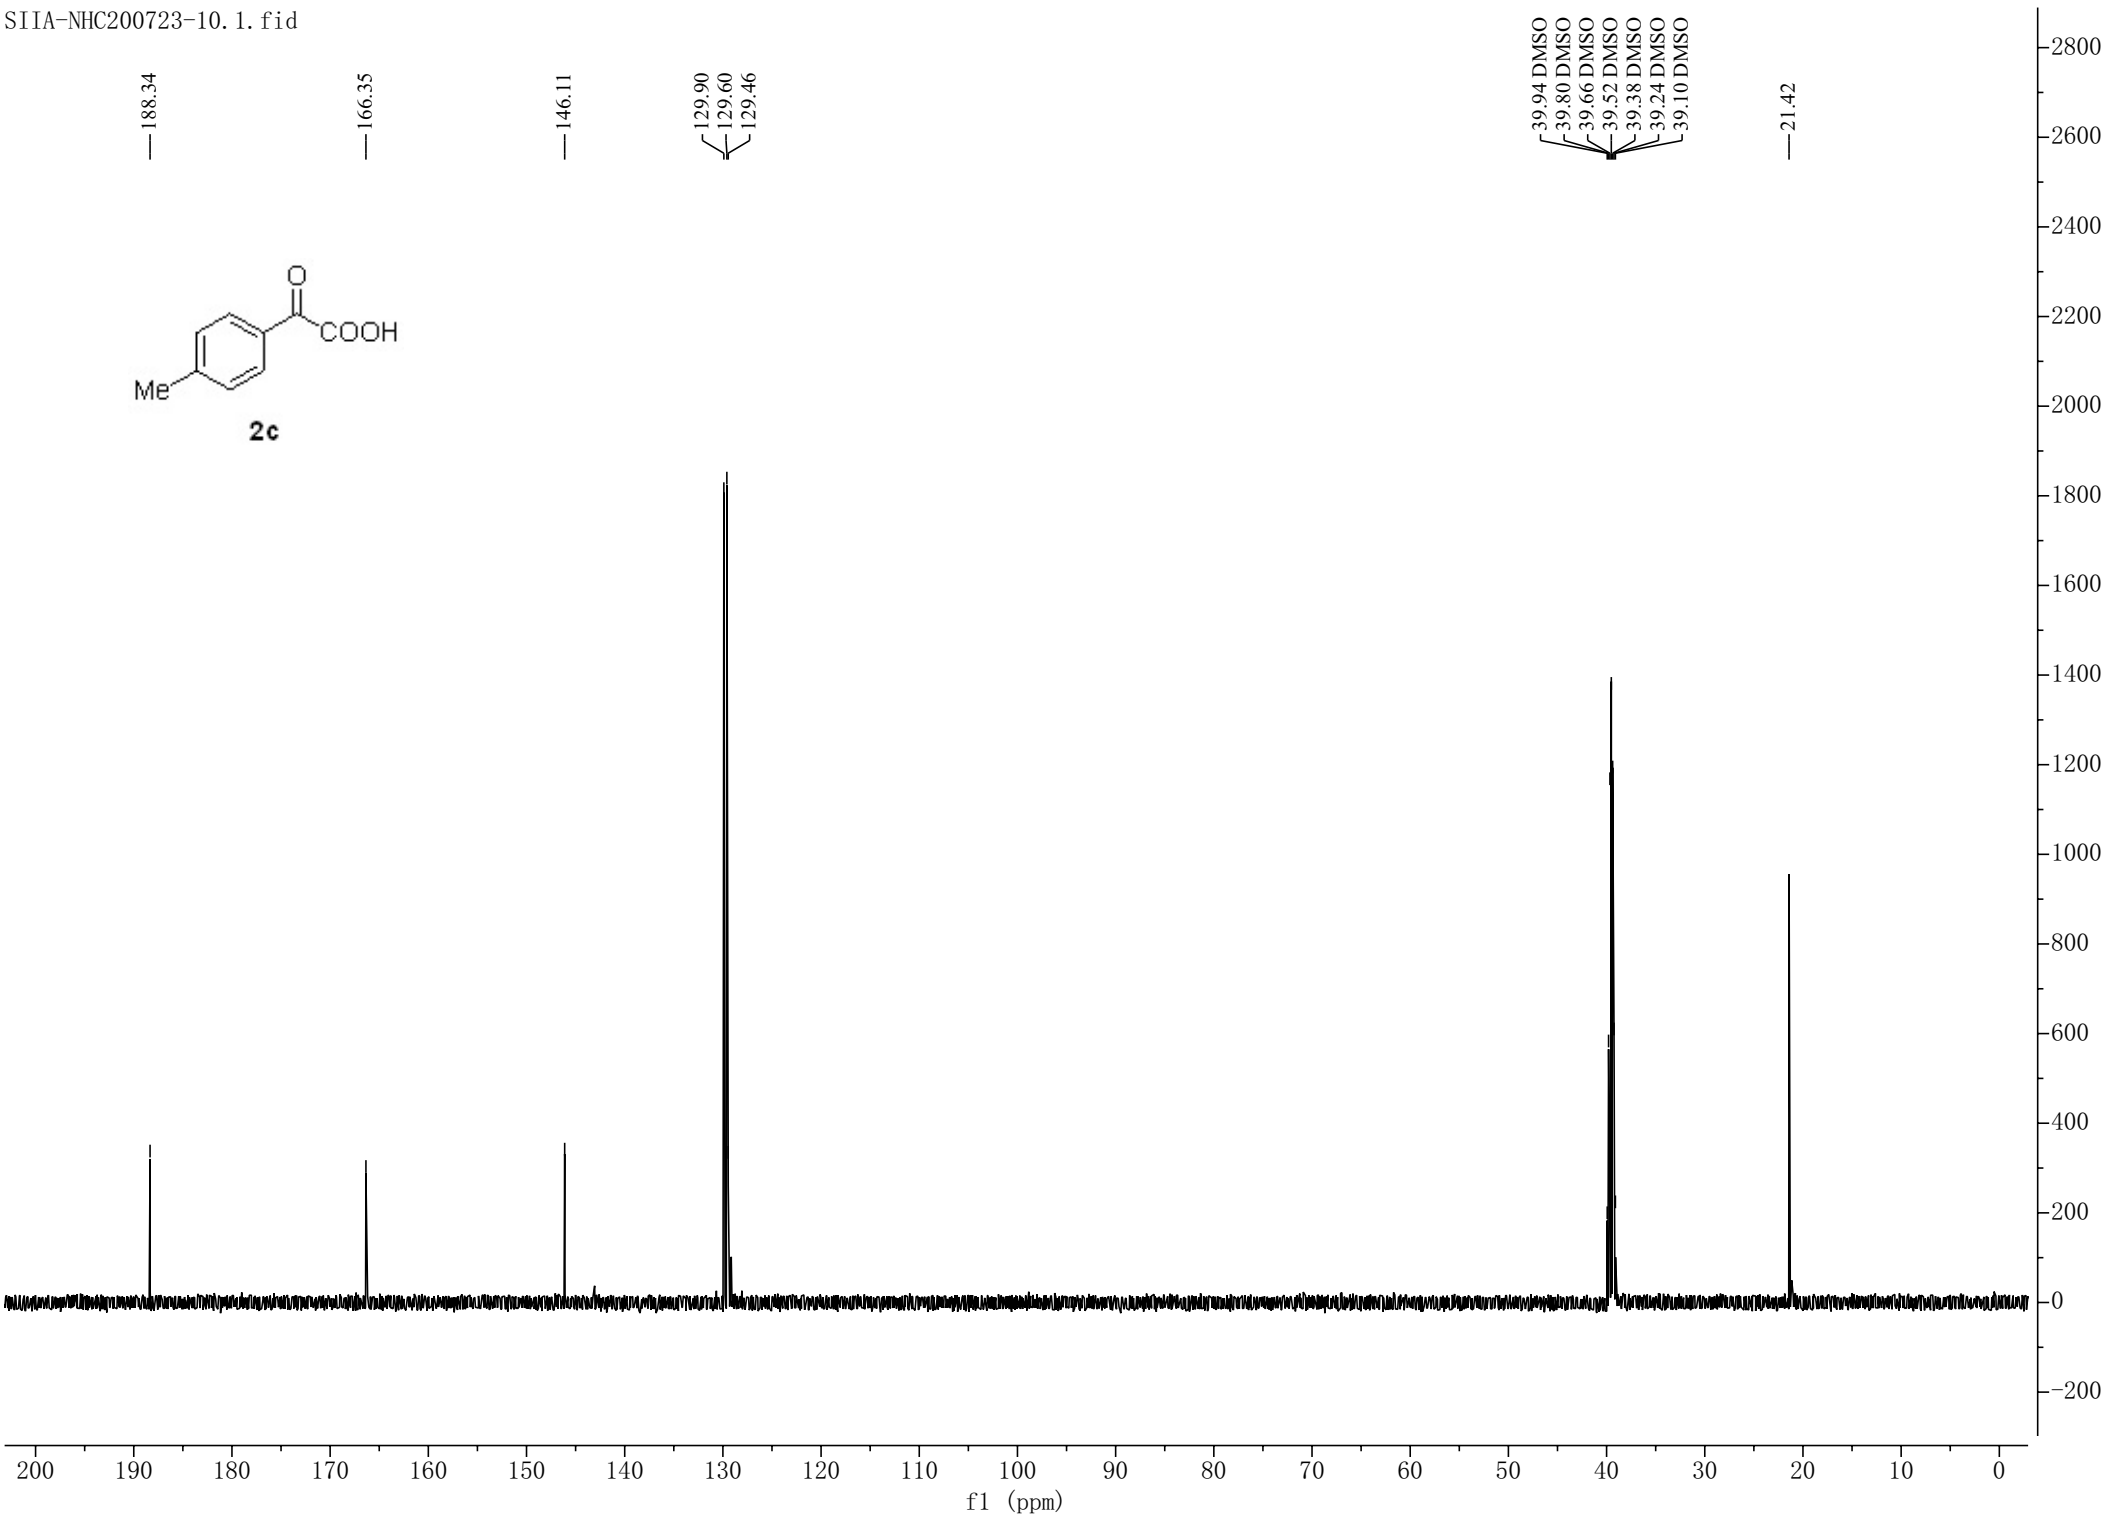



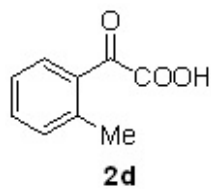

7.77  
7.70  
7.61  
7.59  
7.58  
7.44  
7.42  
7.41  
7.40

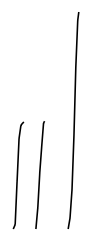

2.53  
2.50

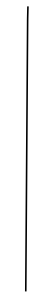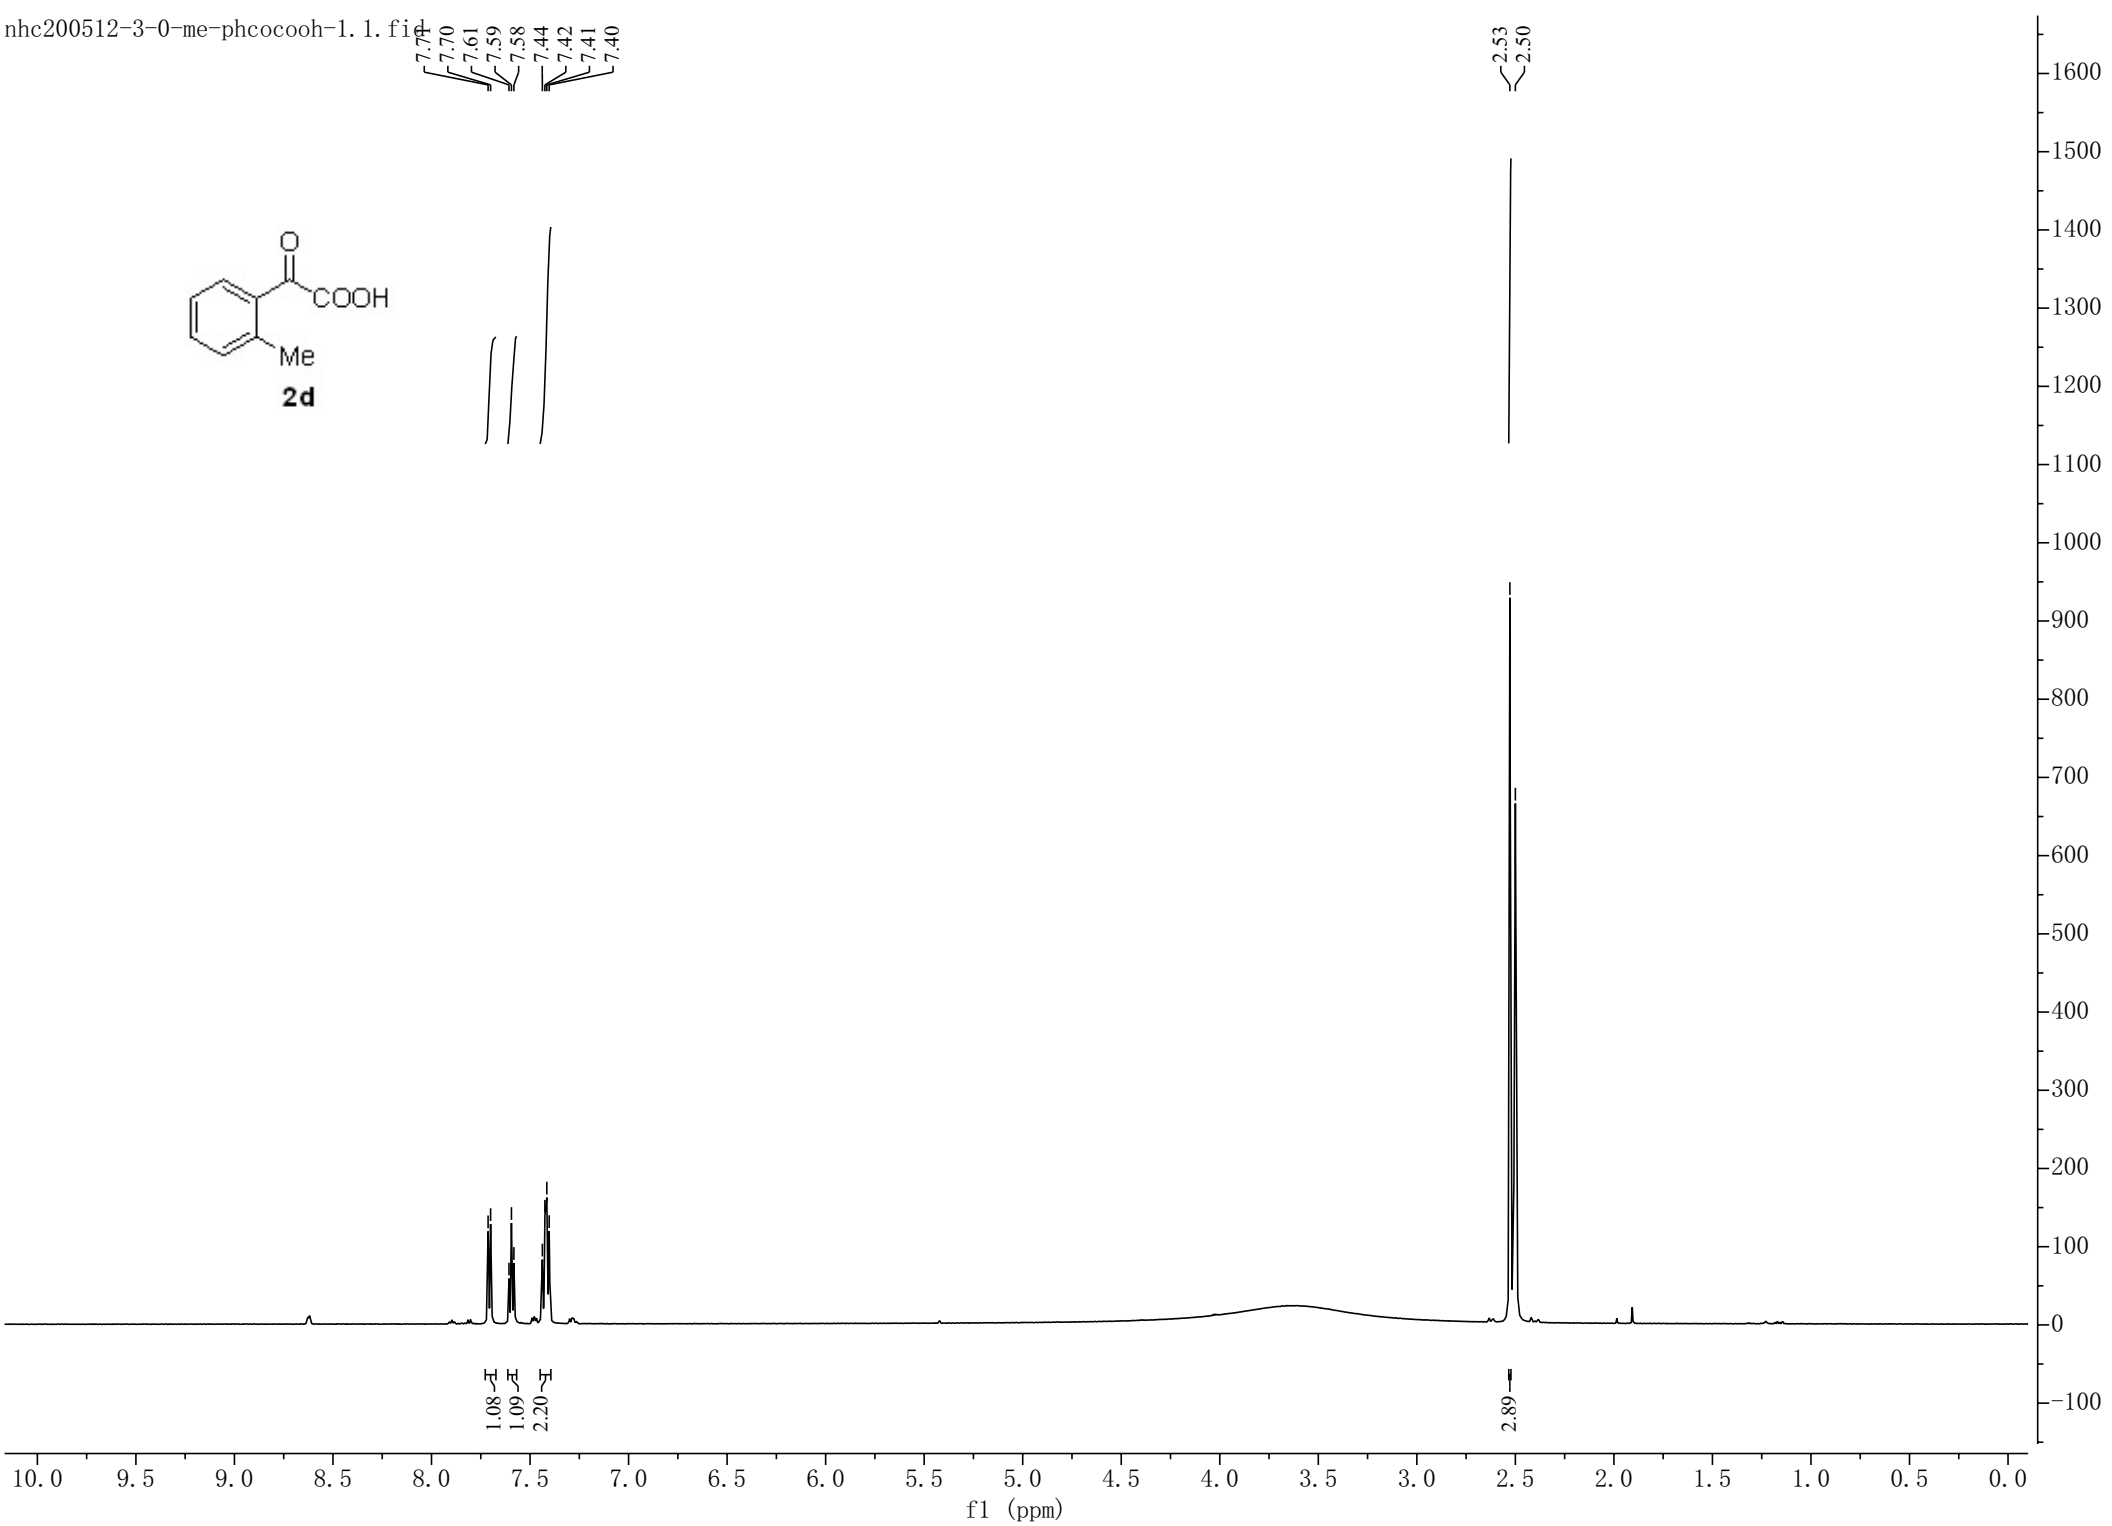

1.08  
1.09  
2.20

2.89

f1 (ppm)

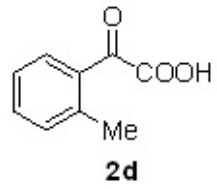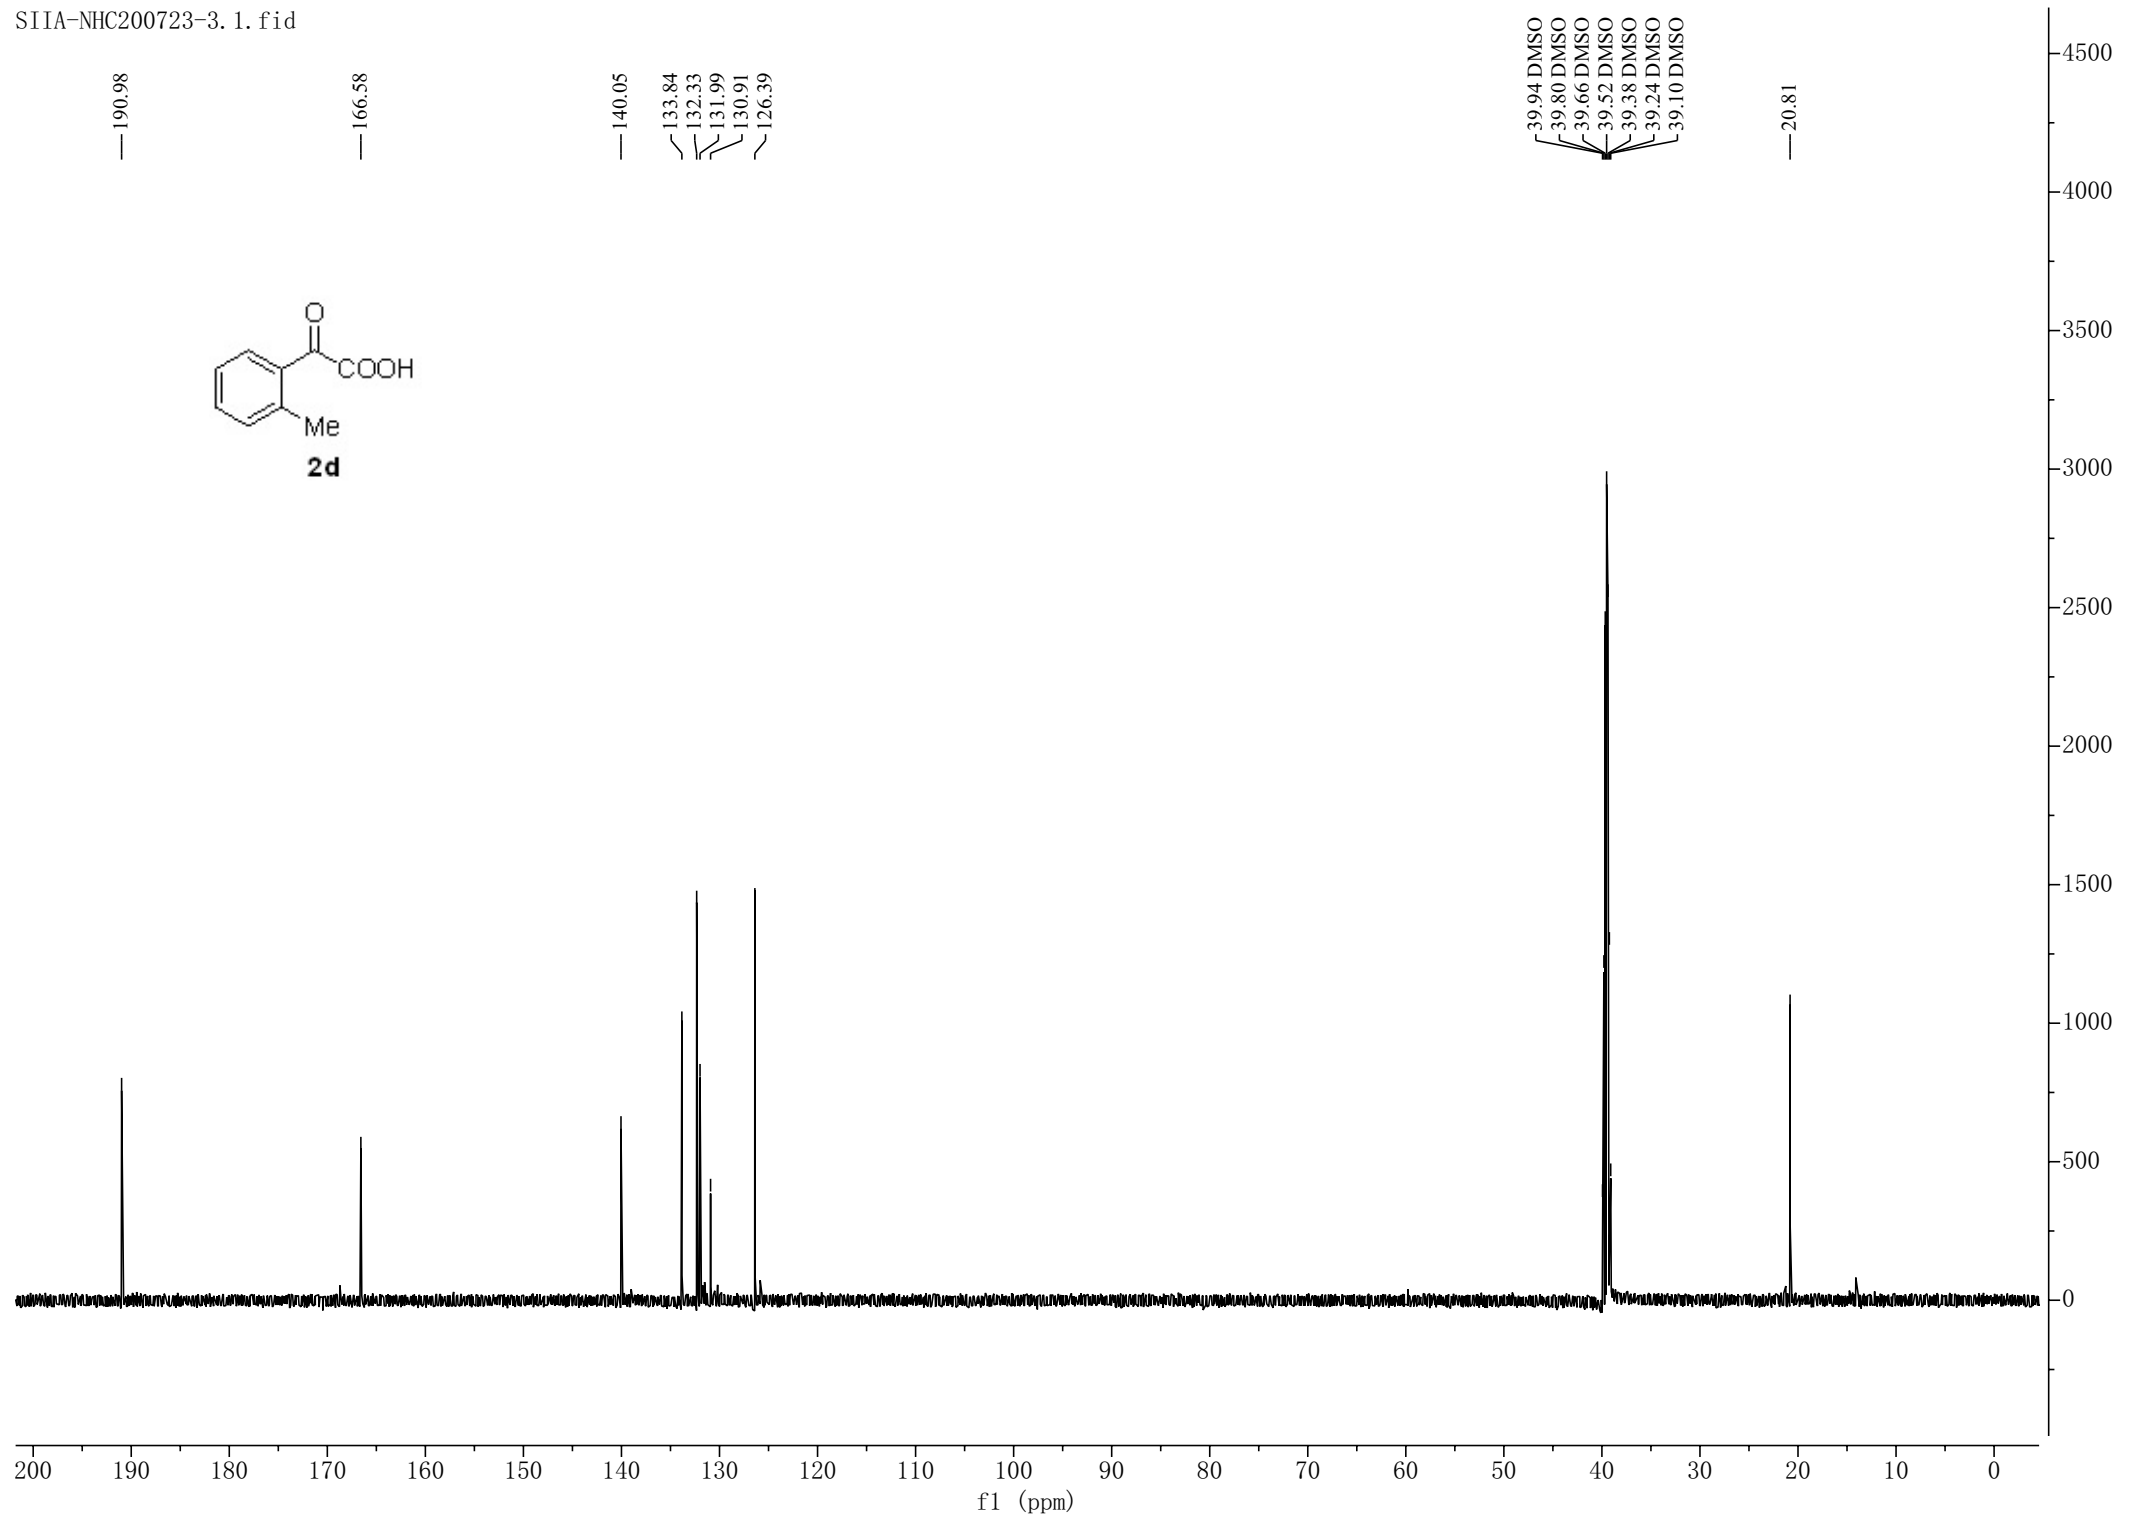

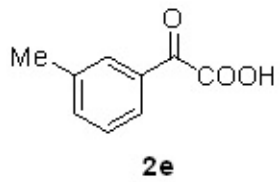

7.73  
7.59  
7.58  
7.52  
7.51  
7.49

3.57

2.50  
2.40

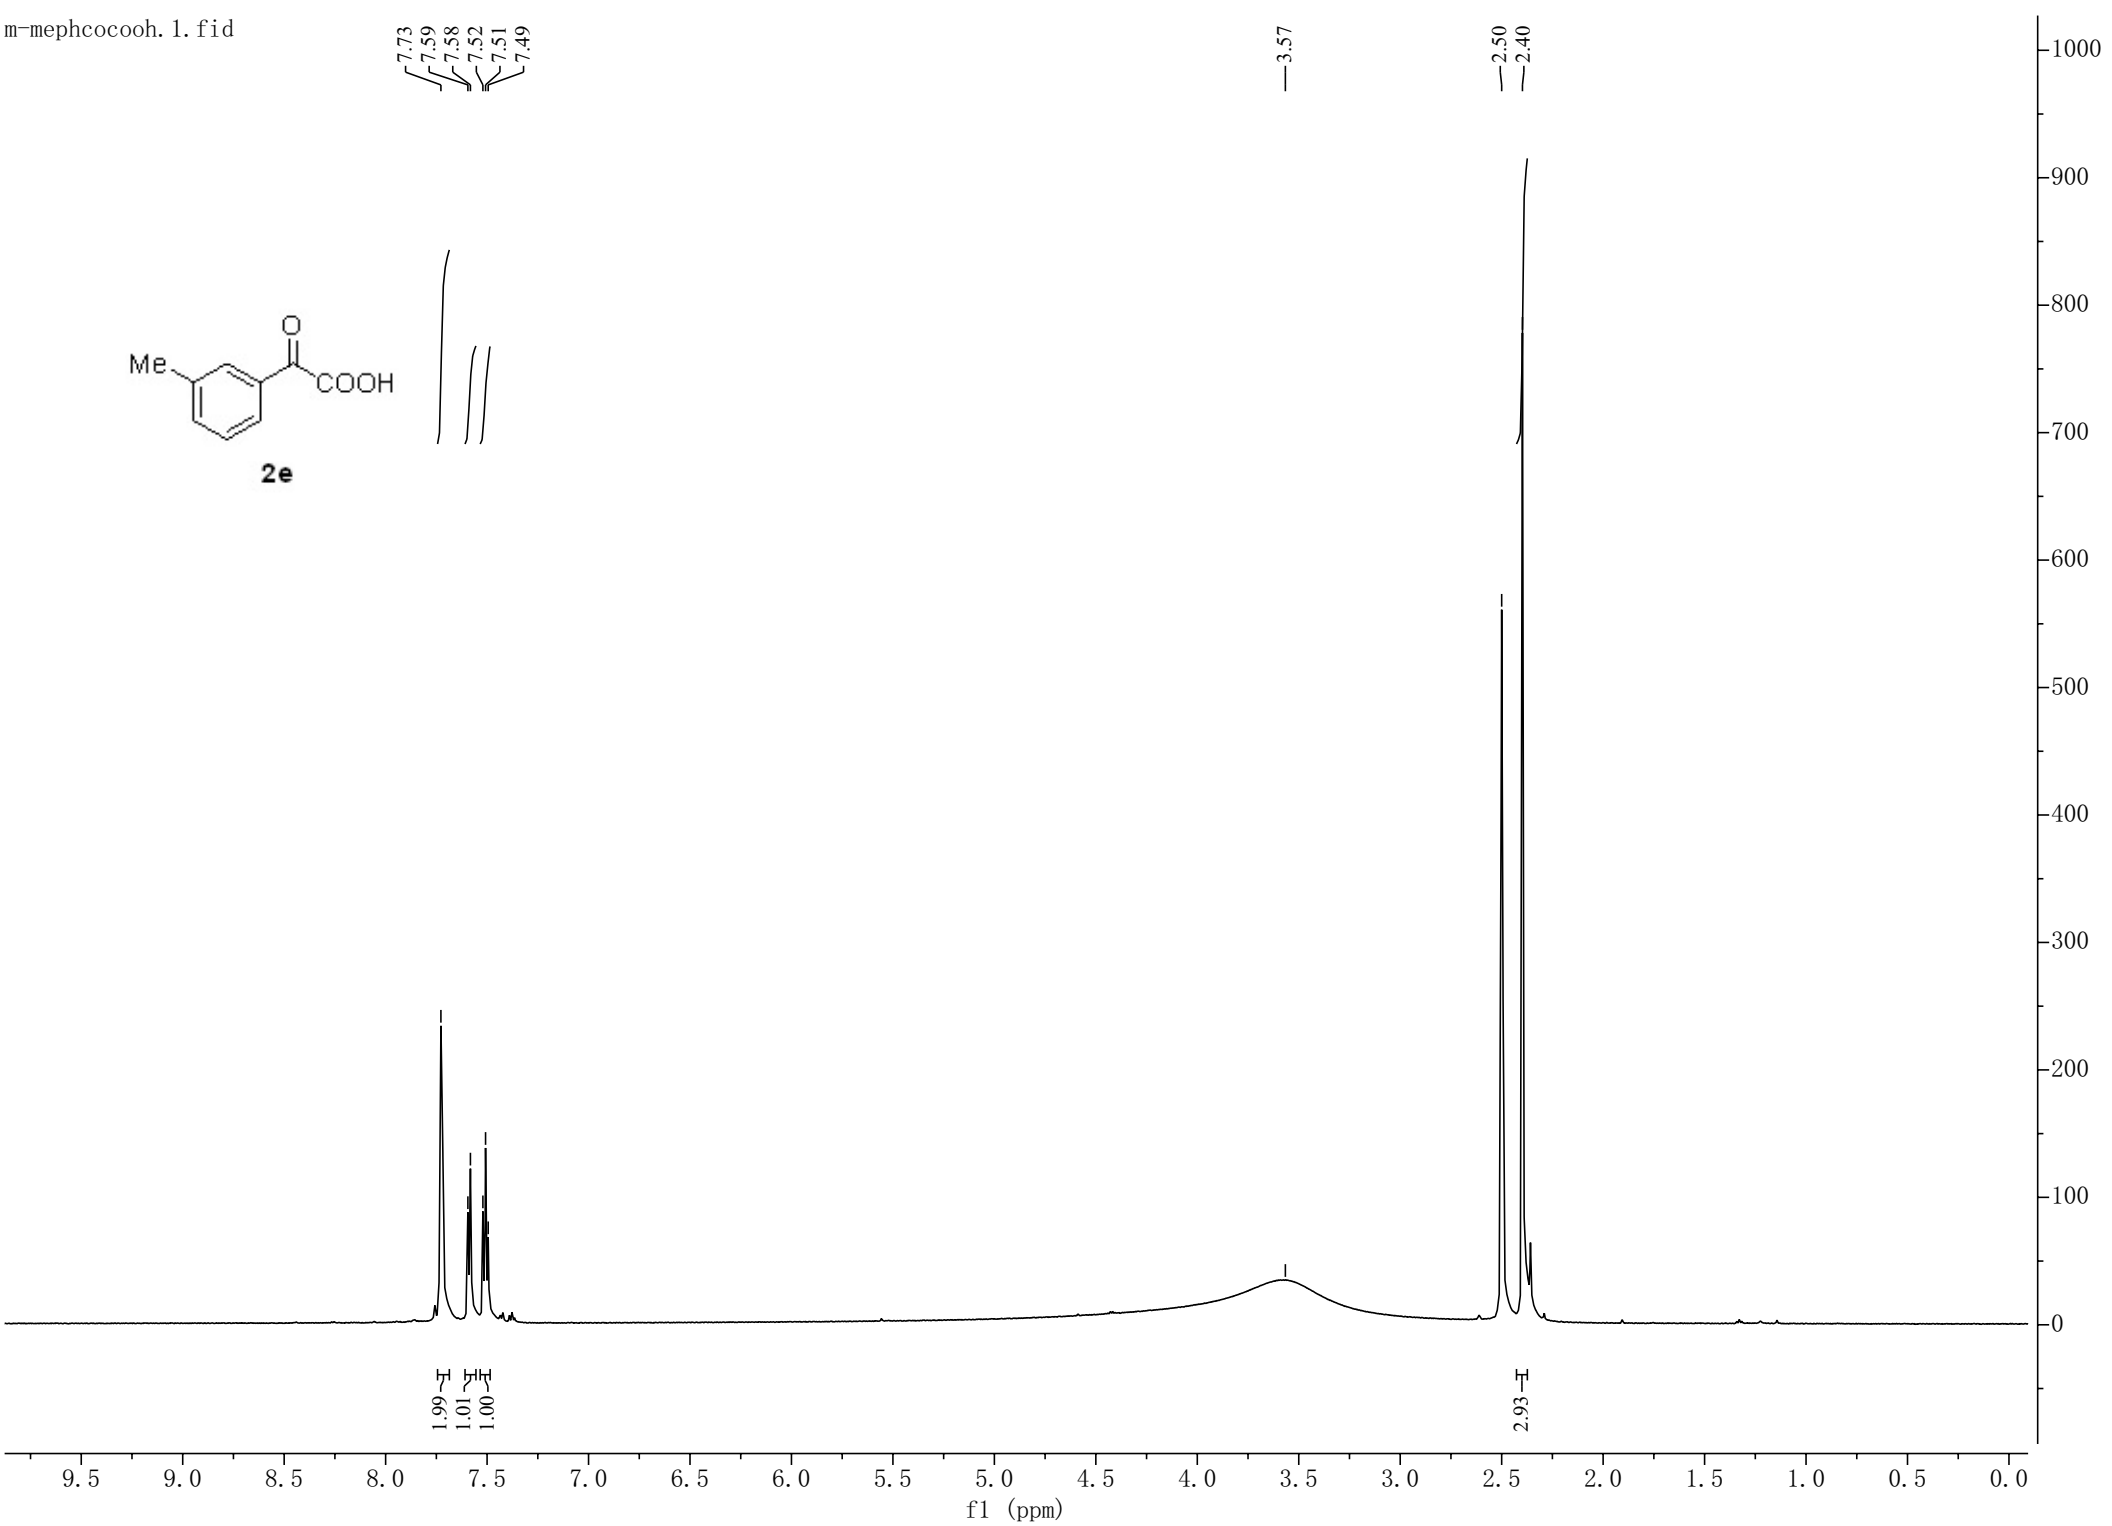

1.99  
1.01  
1.00

2.93

f1 (ppm)

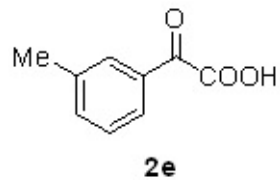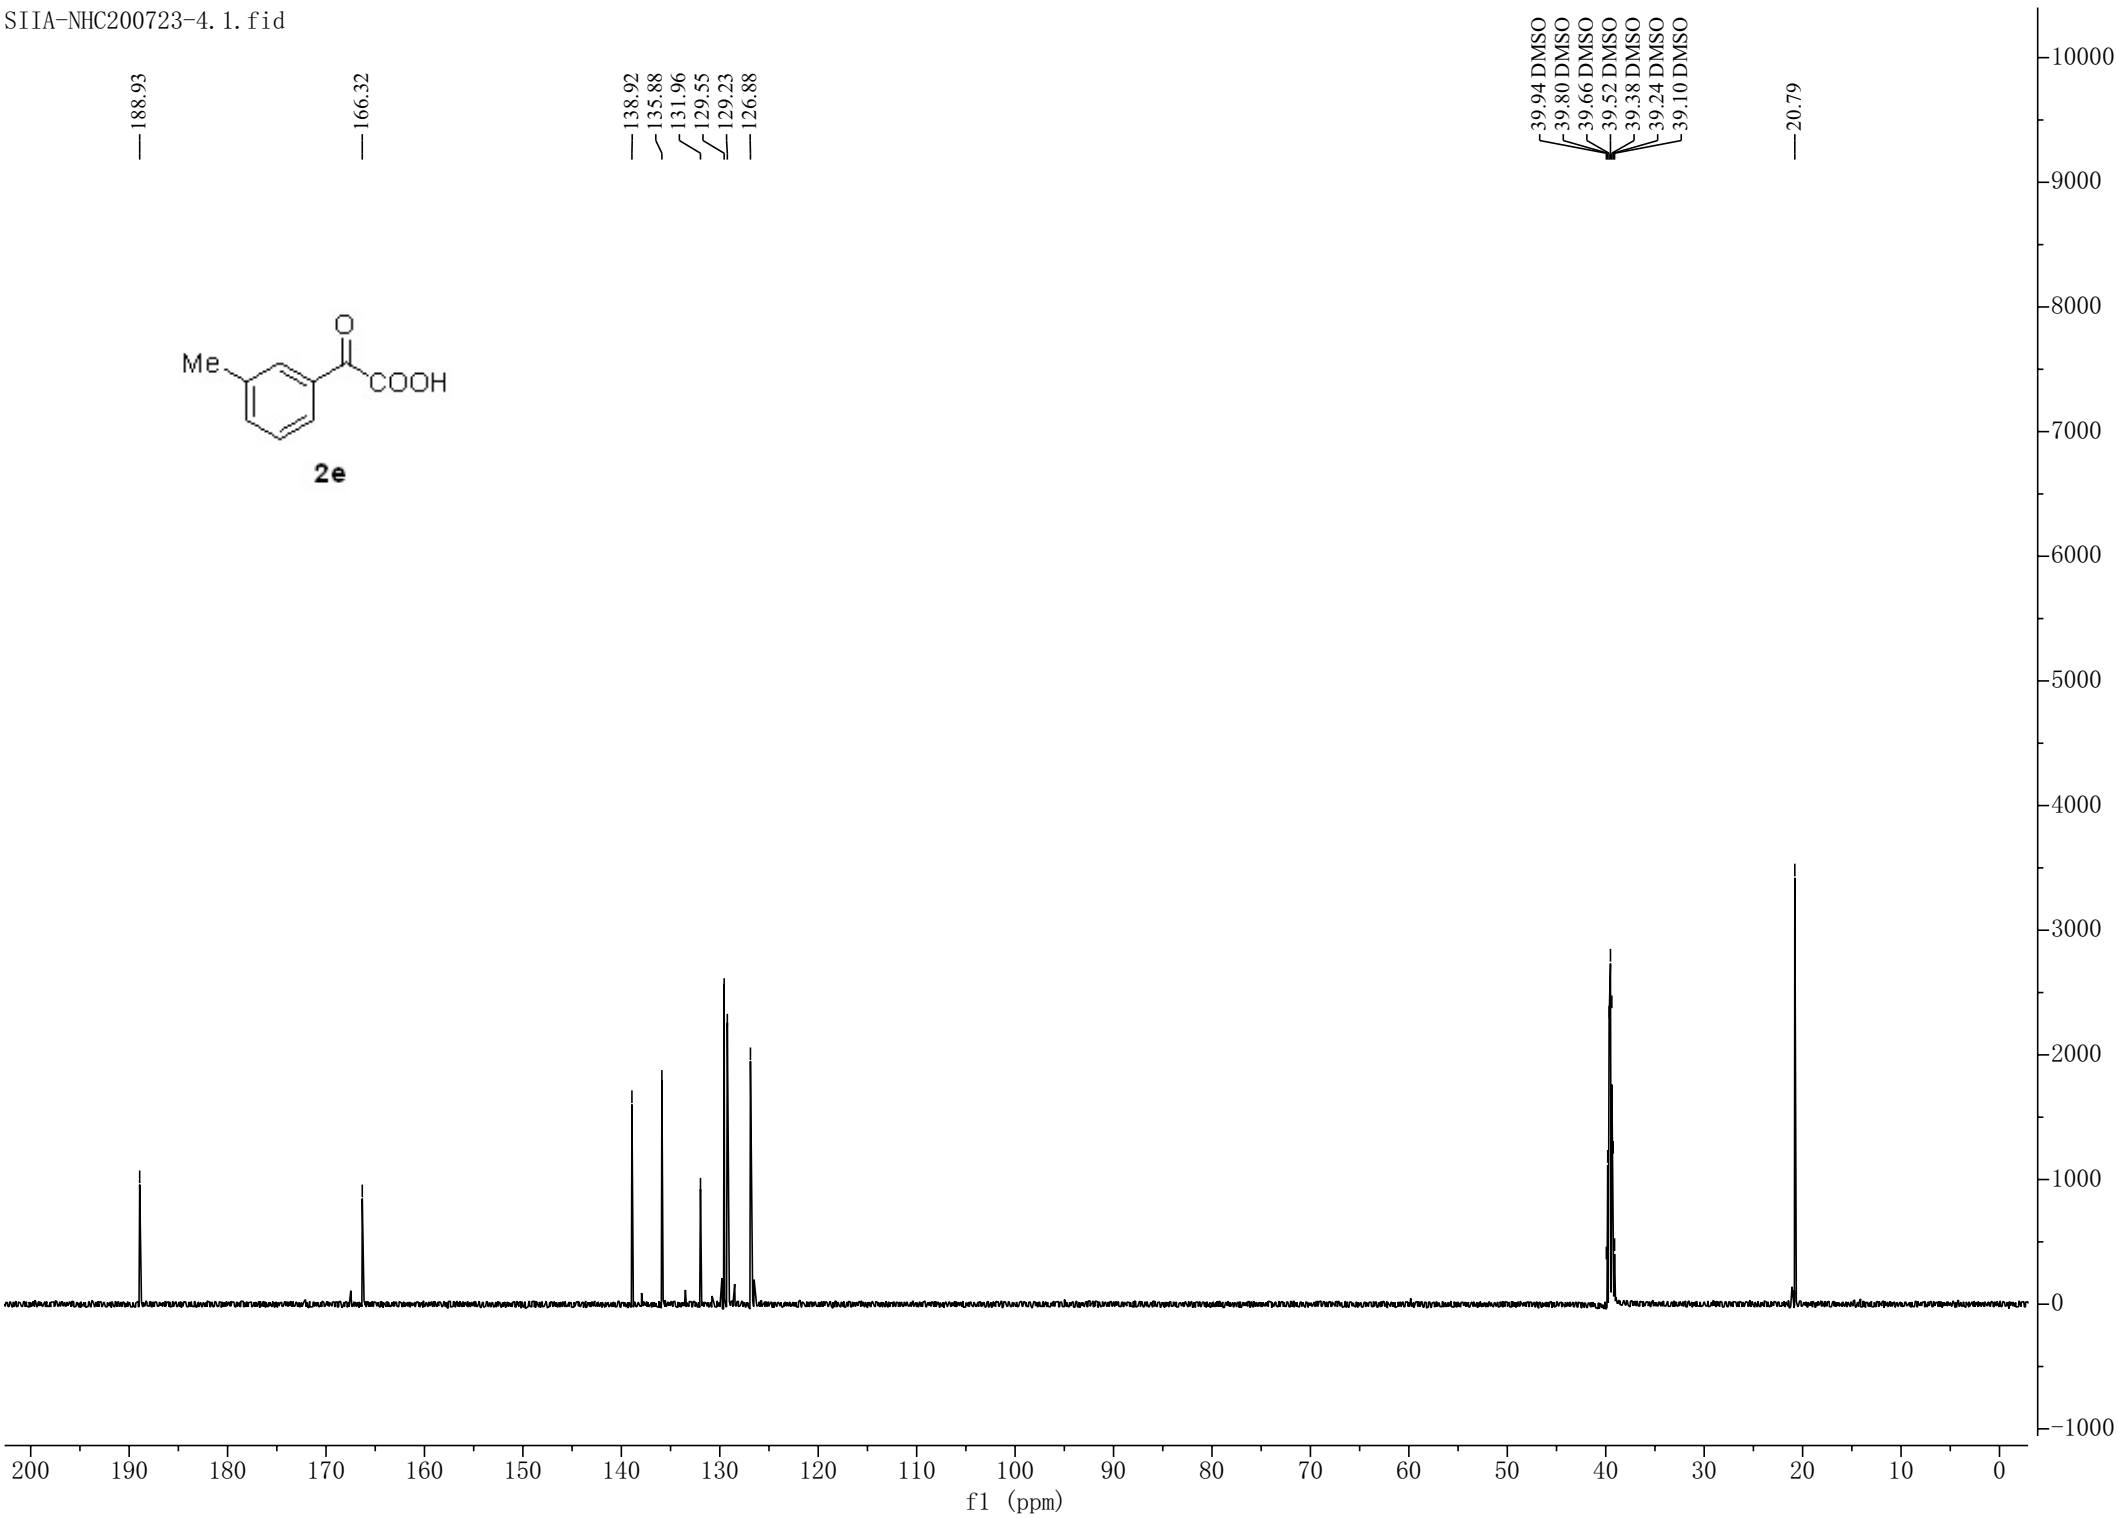

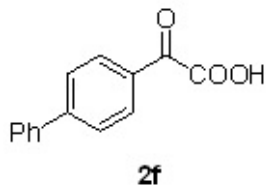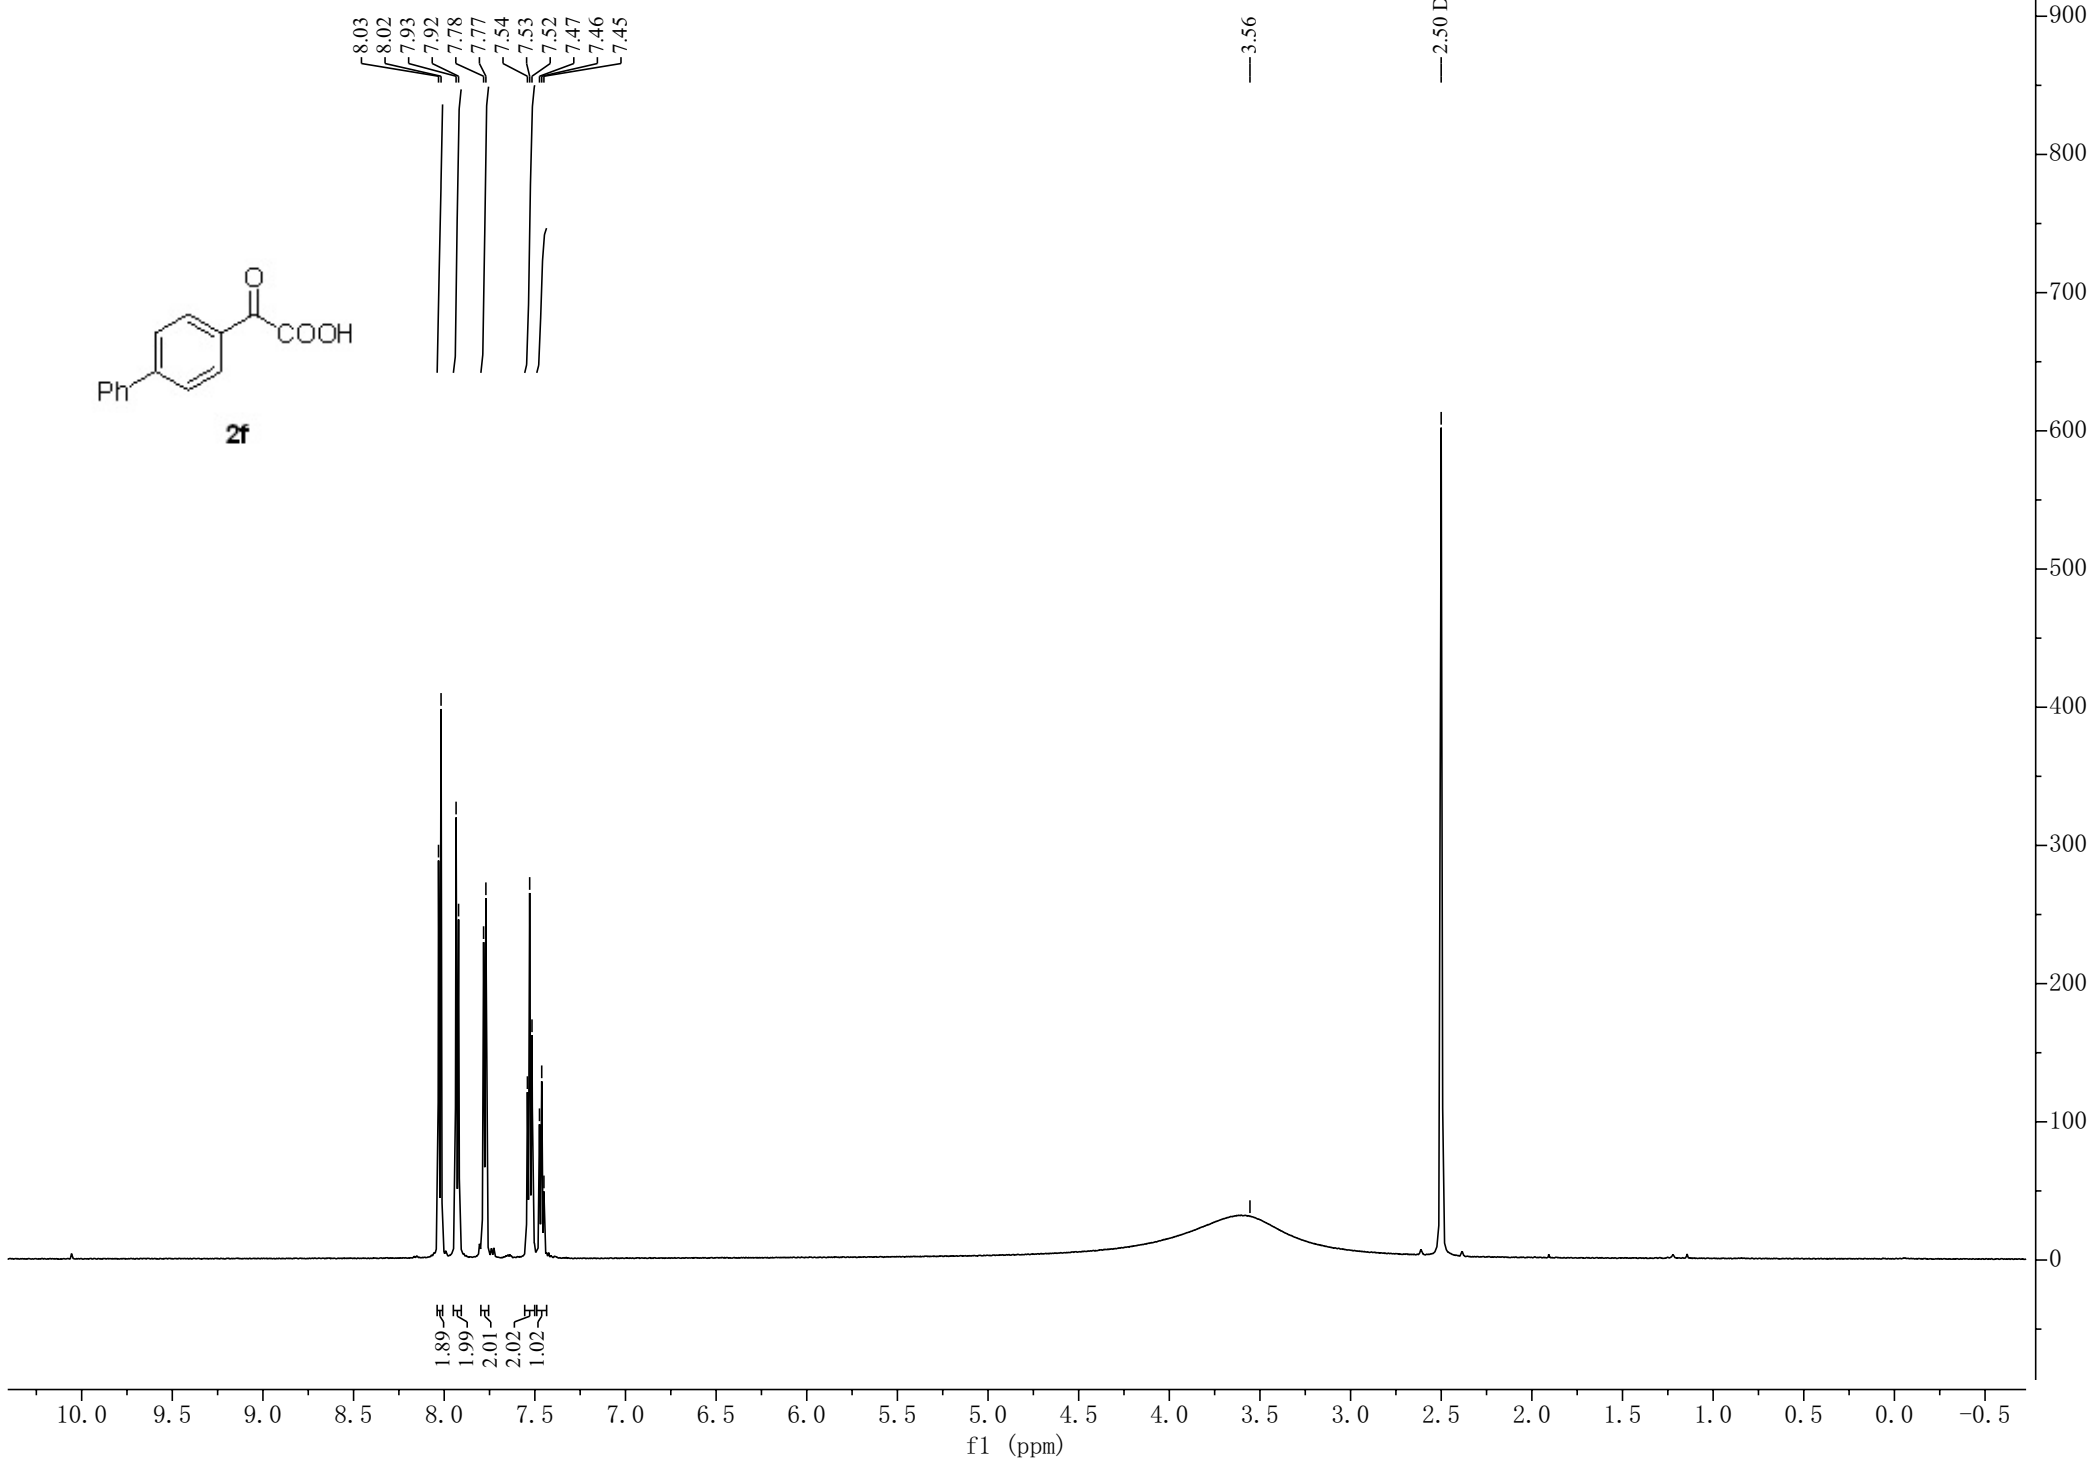

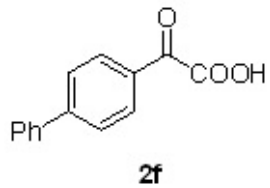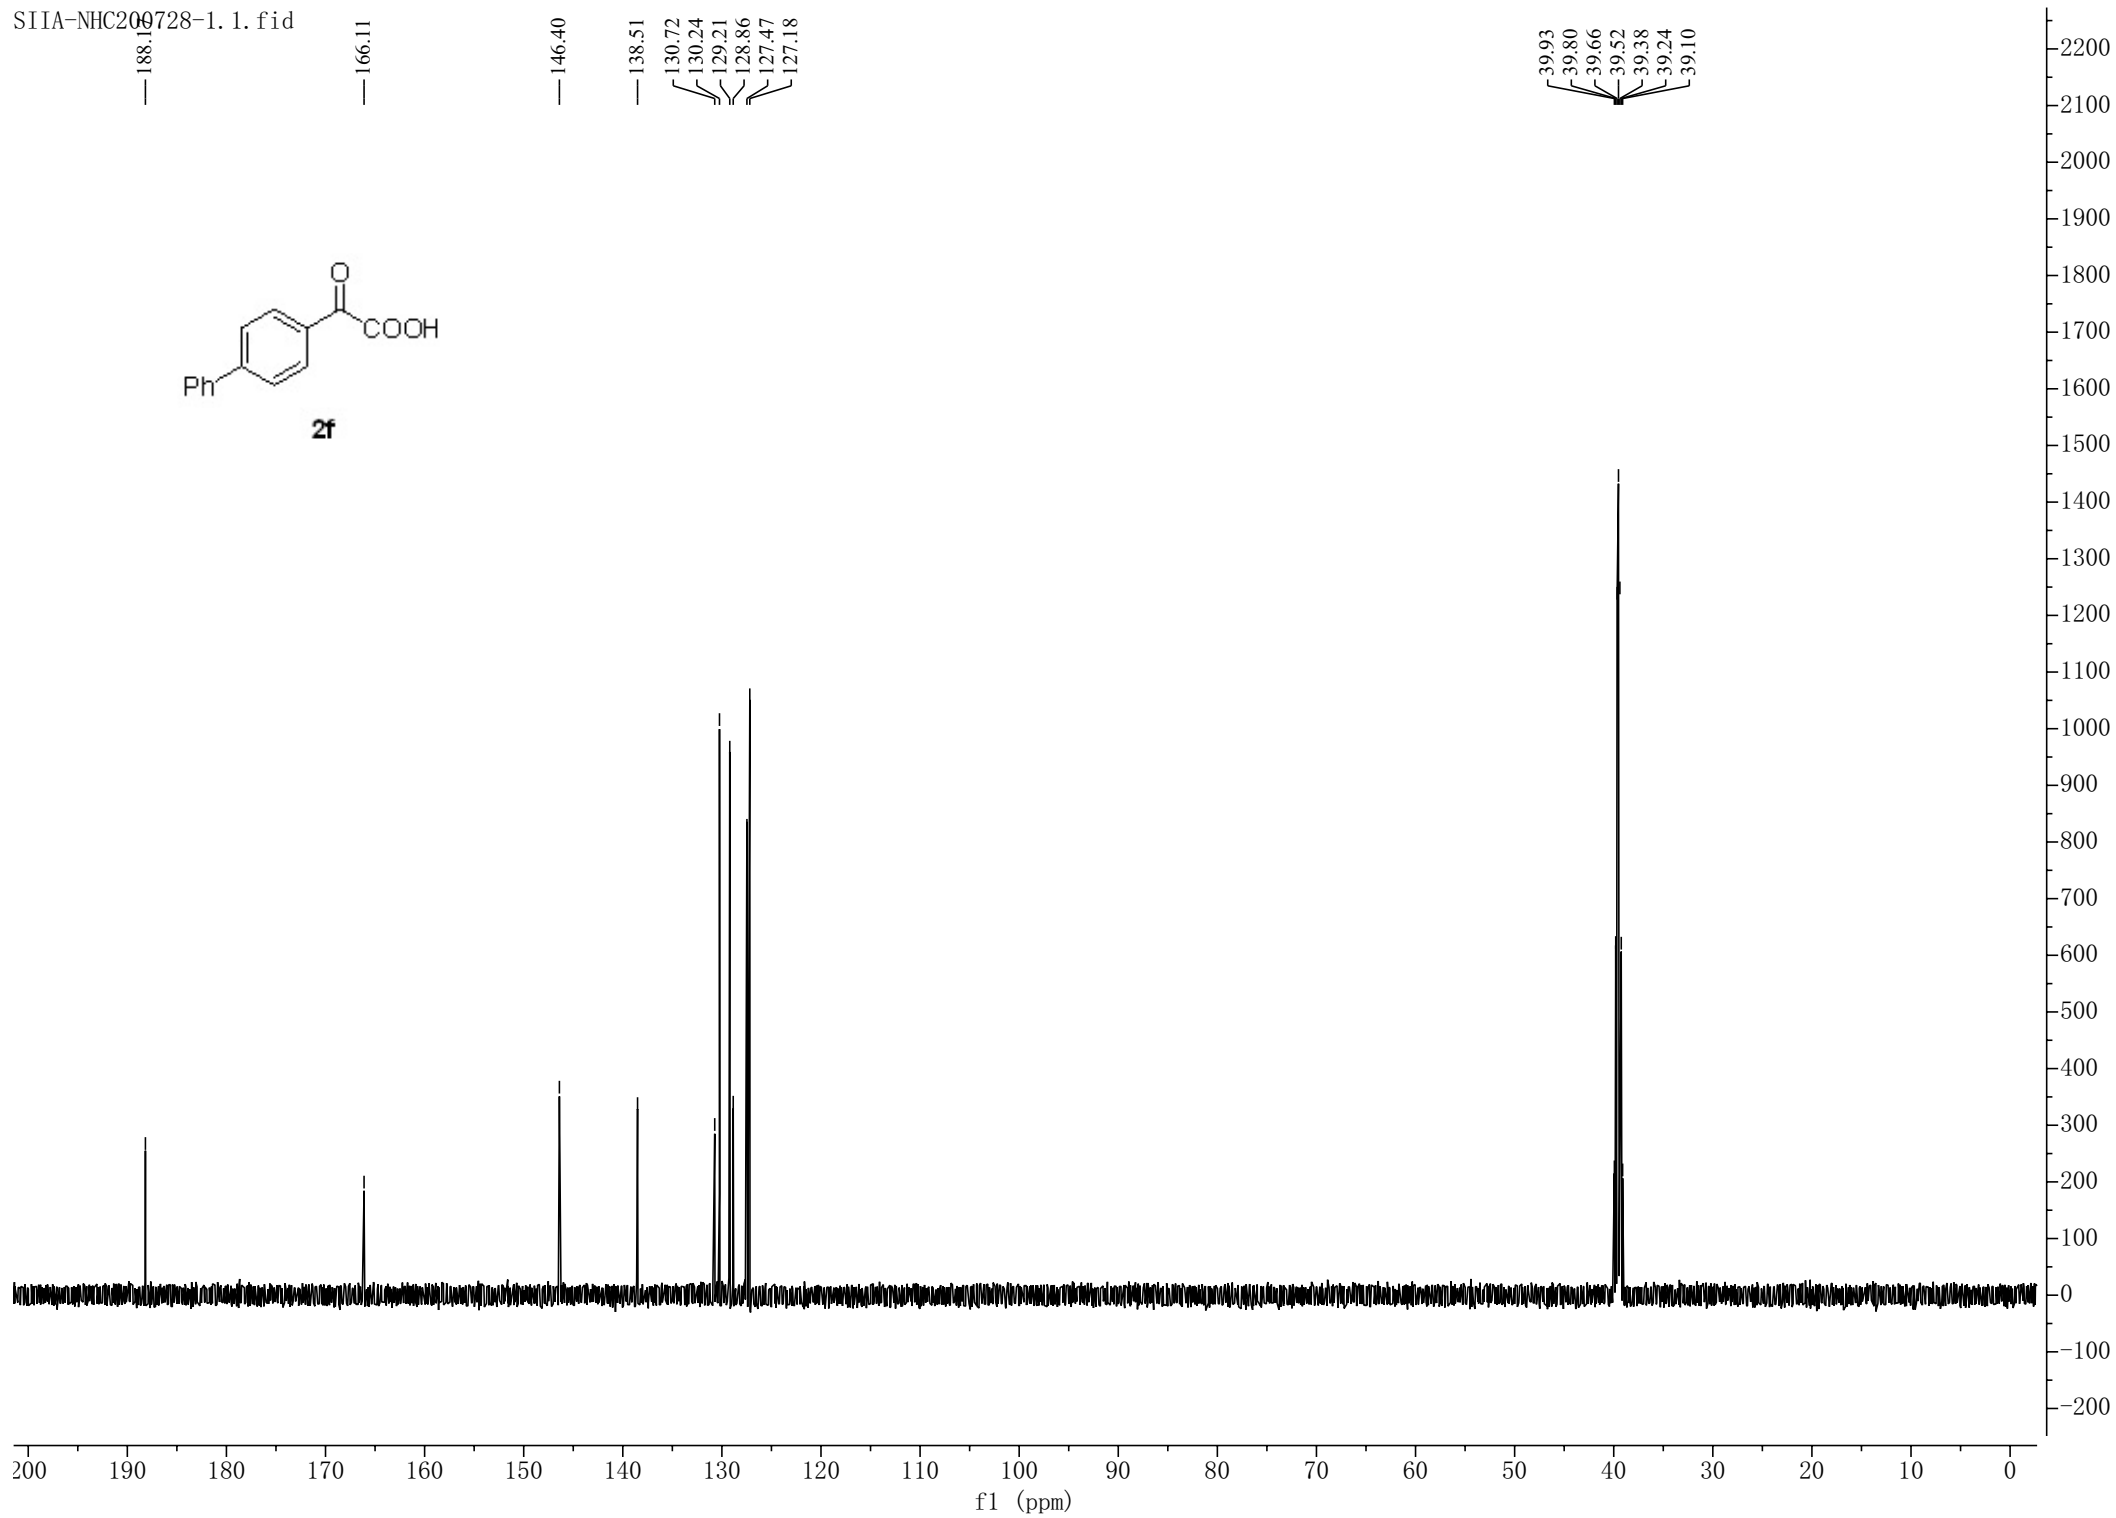

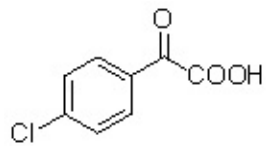

2g

7.97  
7.96  
7.70  
7.70  
7.69  
7.68  
7.68

2.50

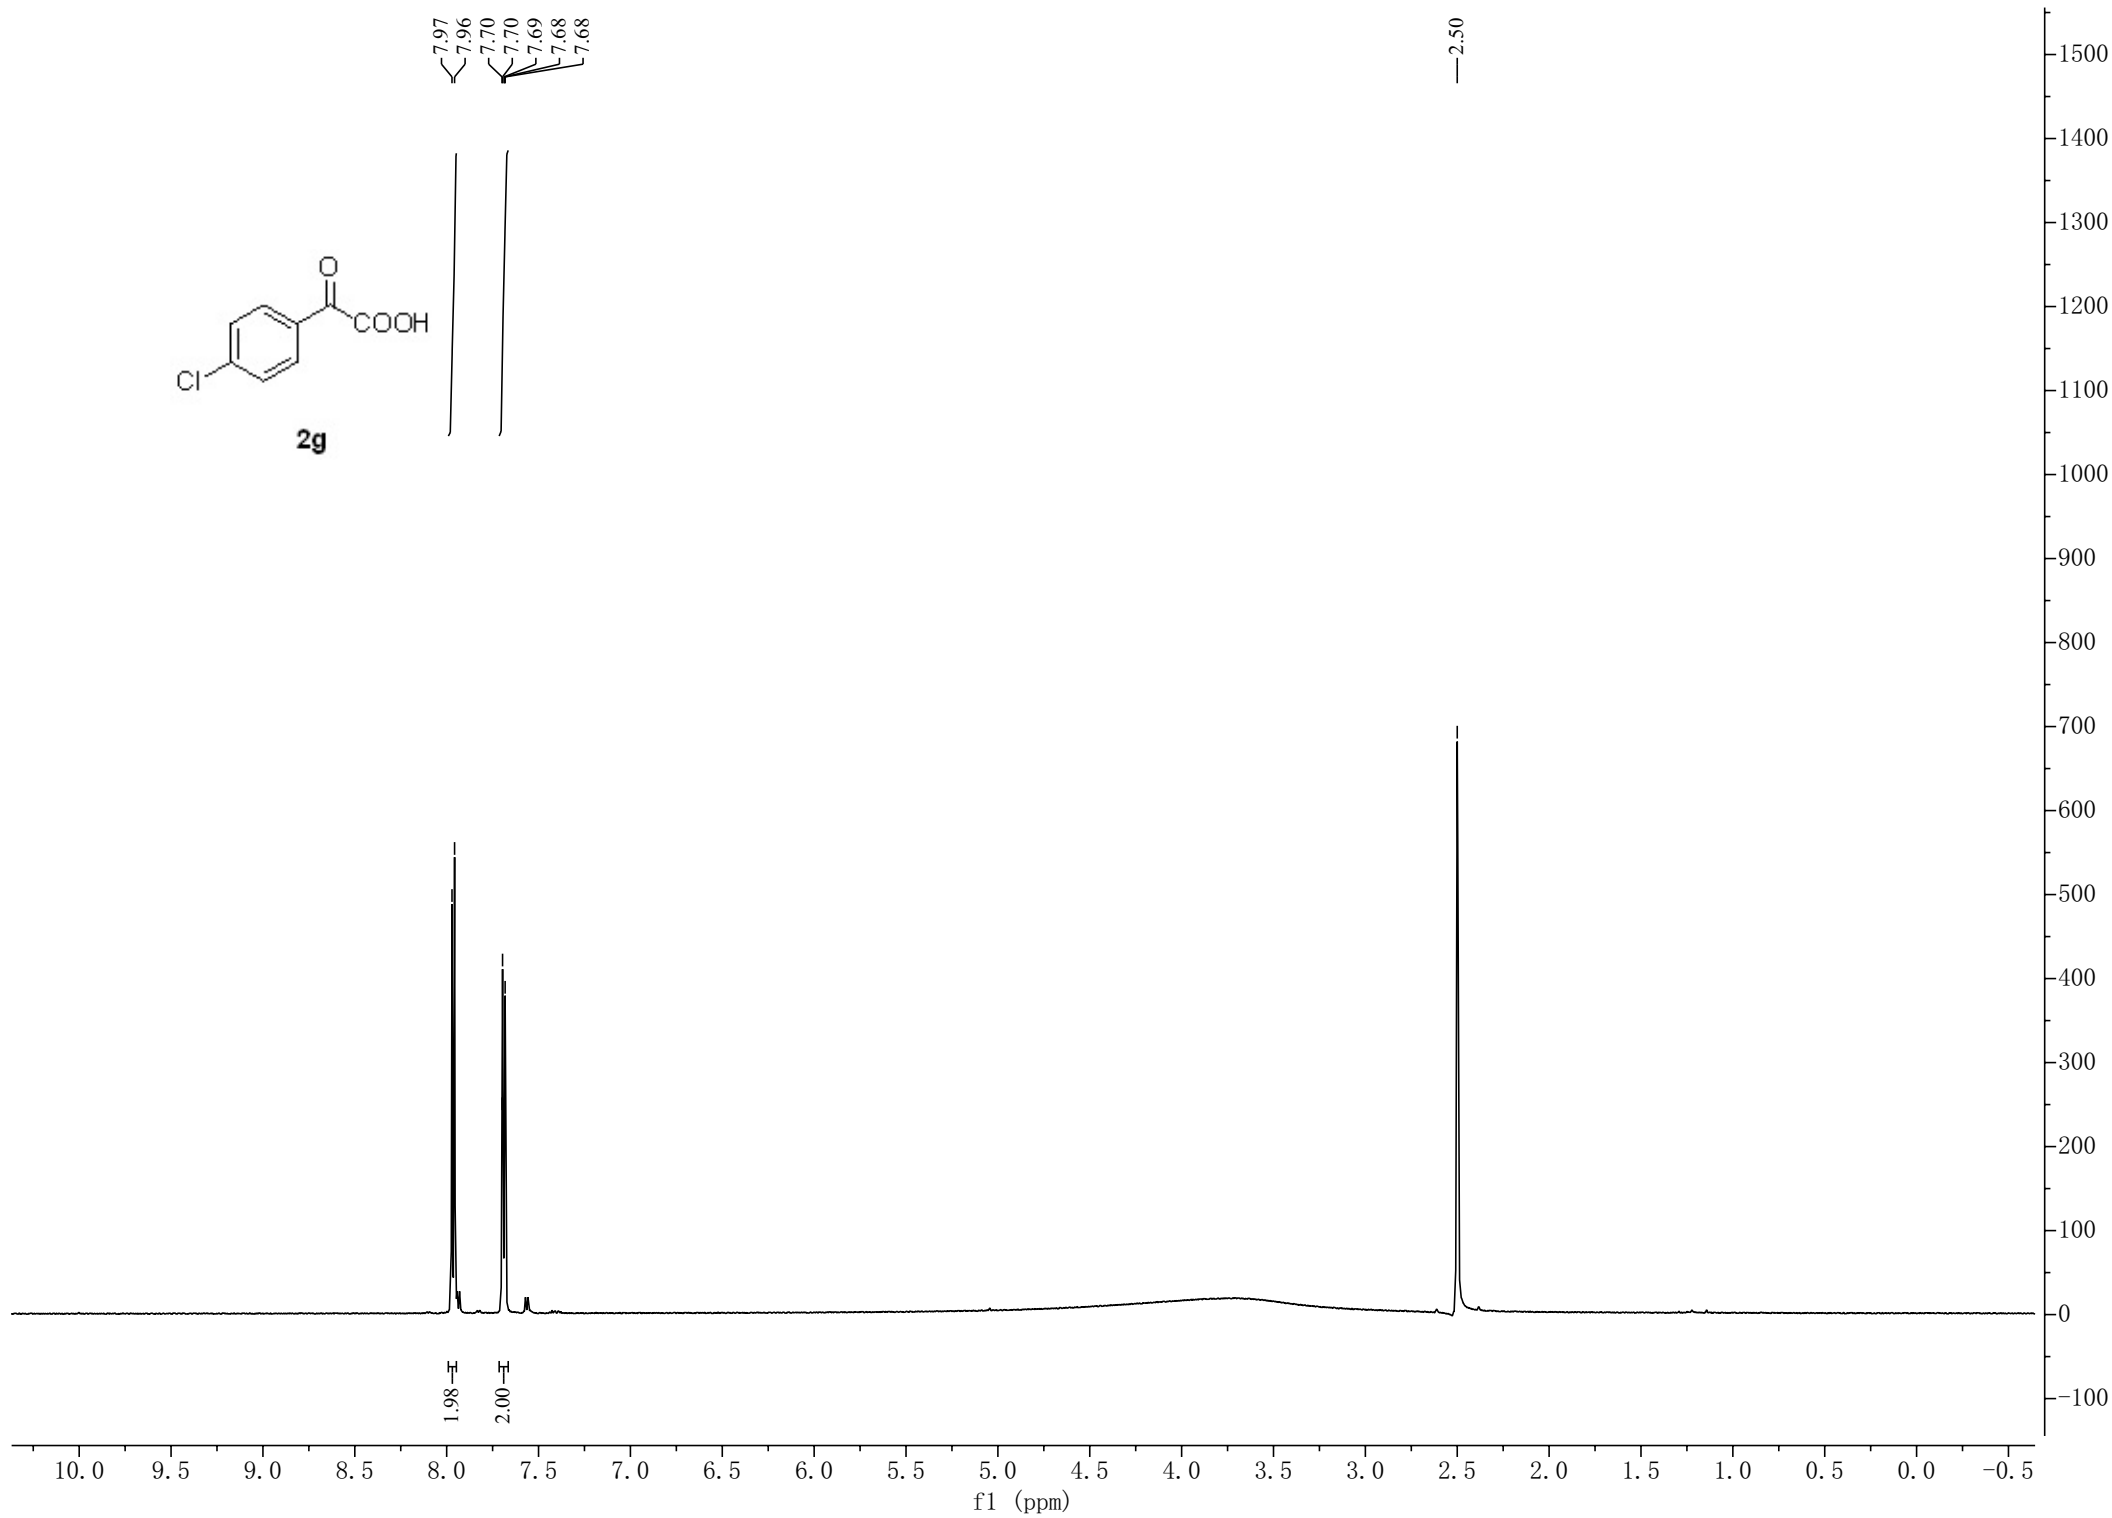

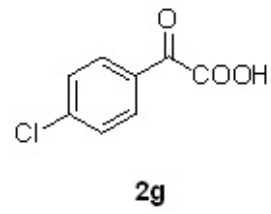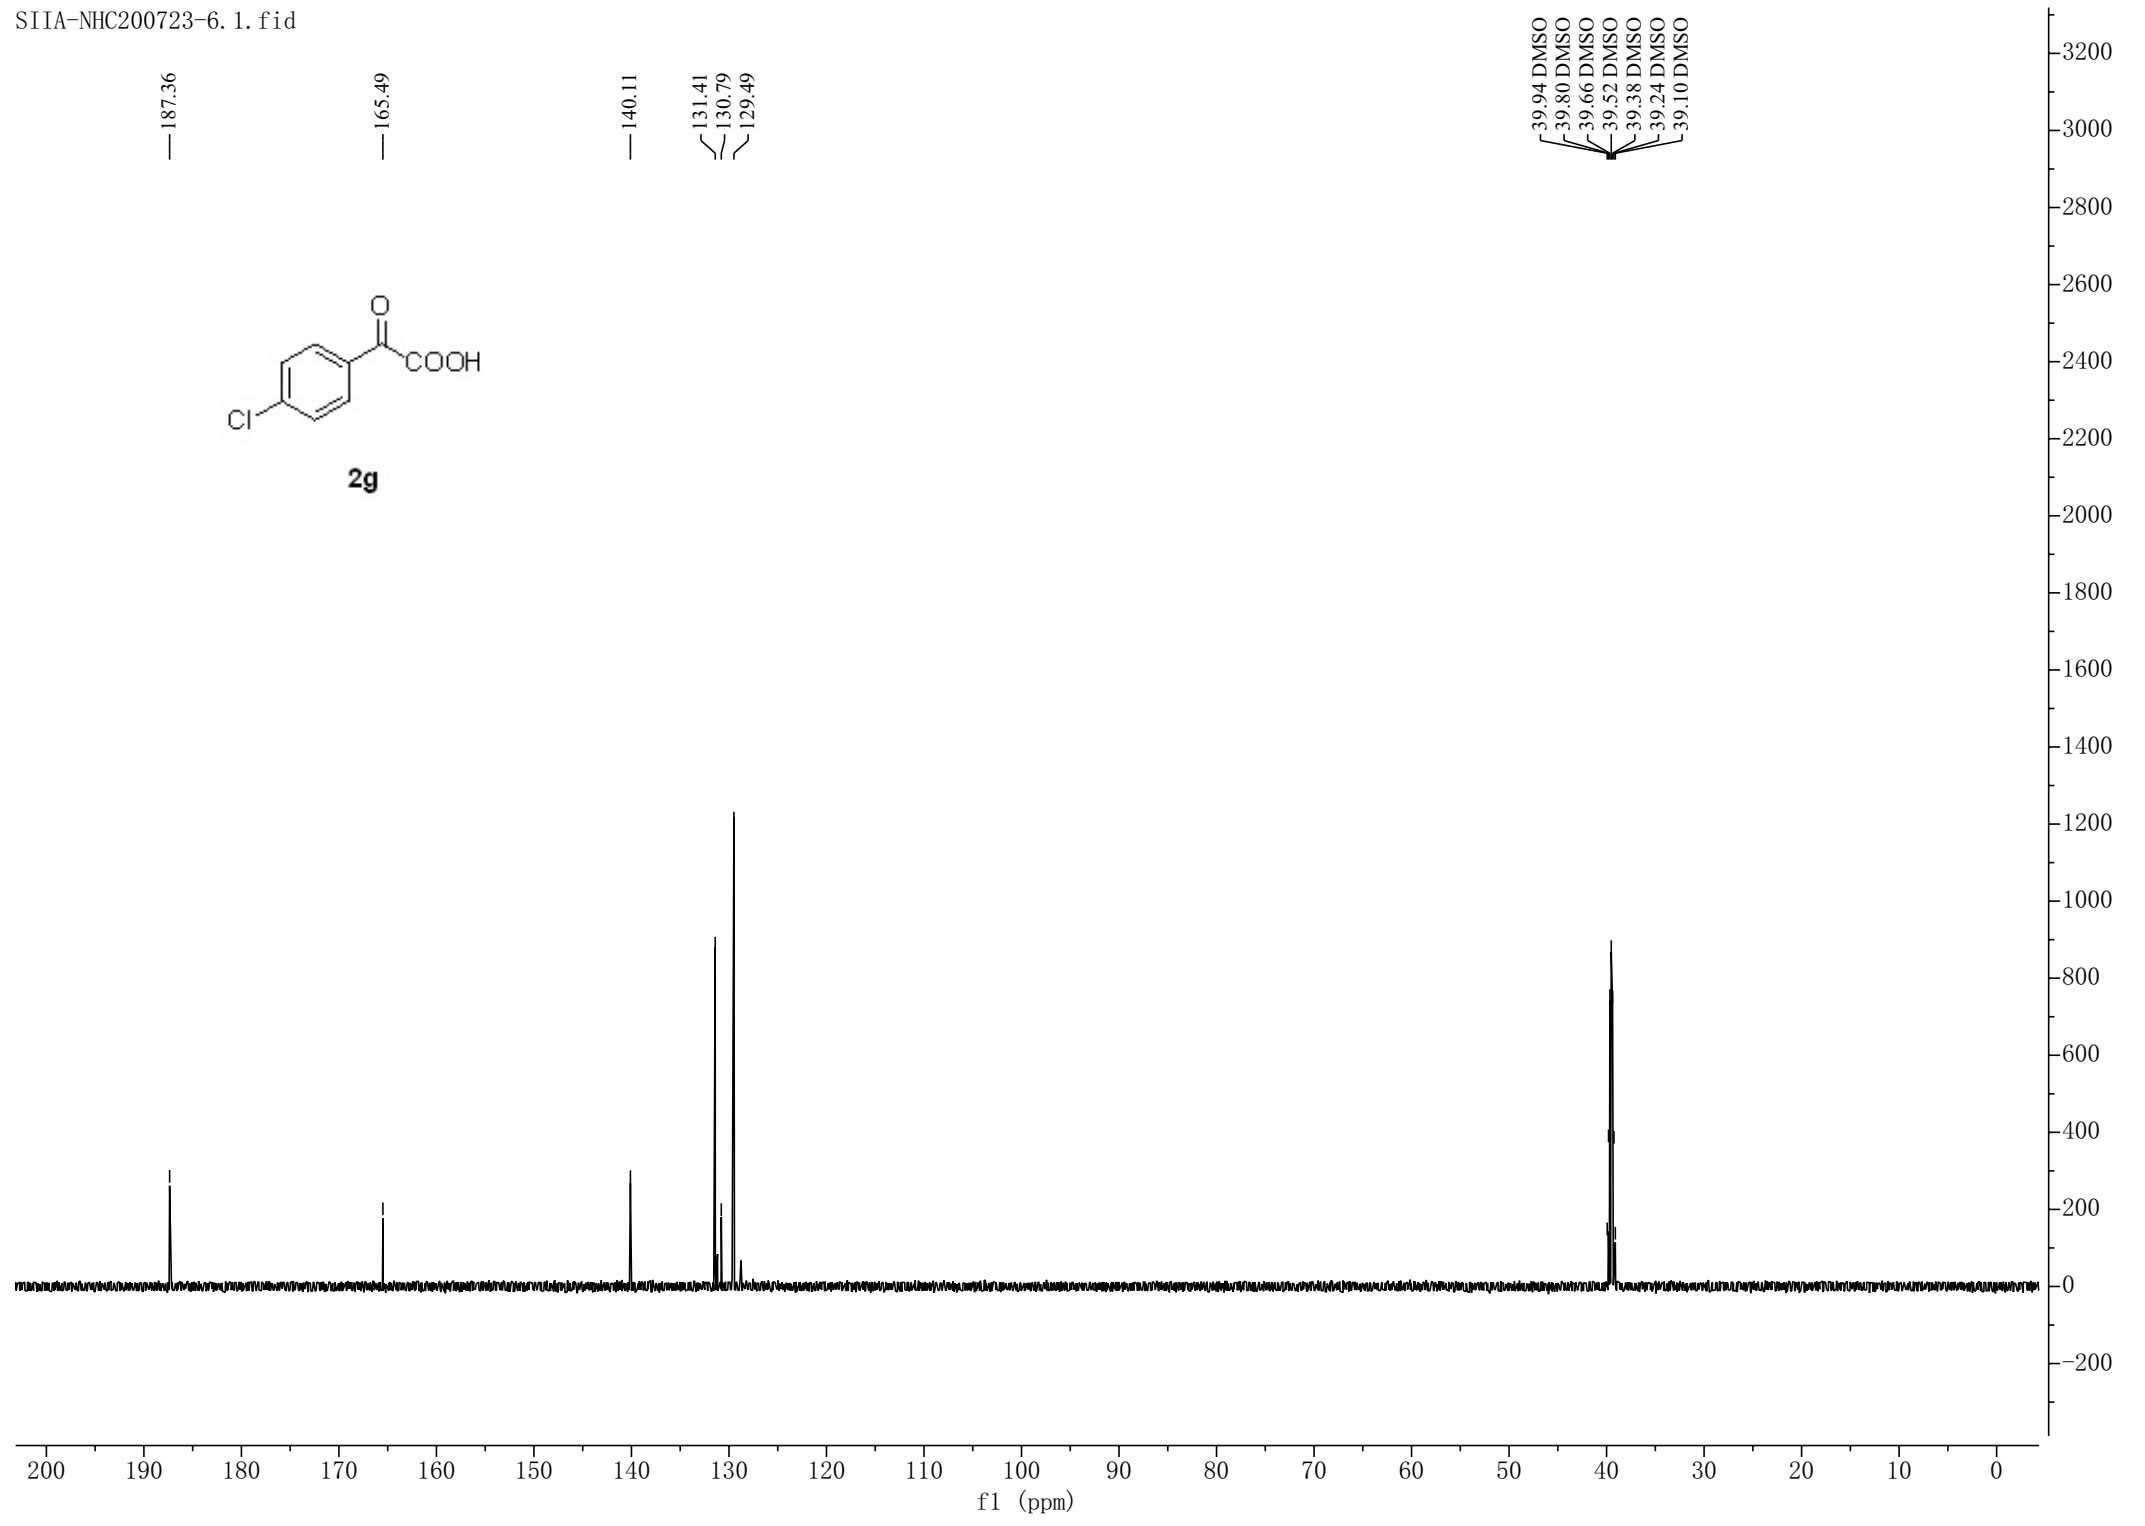



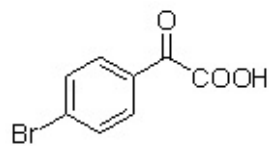

**2h**

7.89  
7.87  
7.84  
7.83

3.77

2.50  
2.50  
2.50

1.95  
2.00

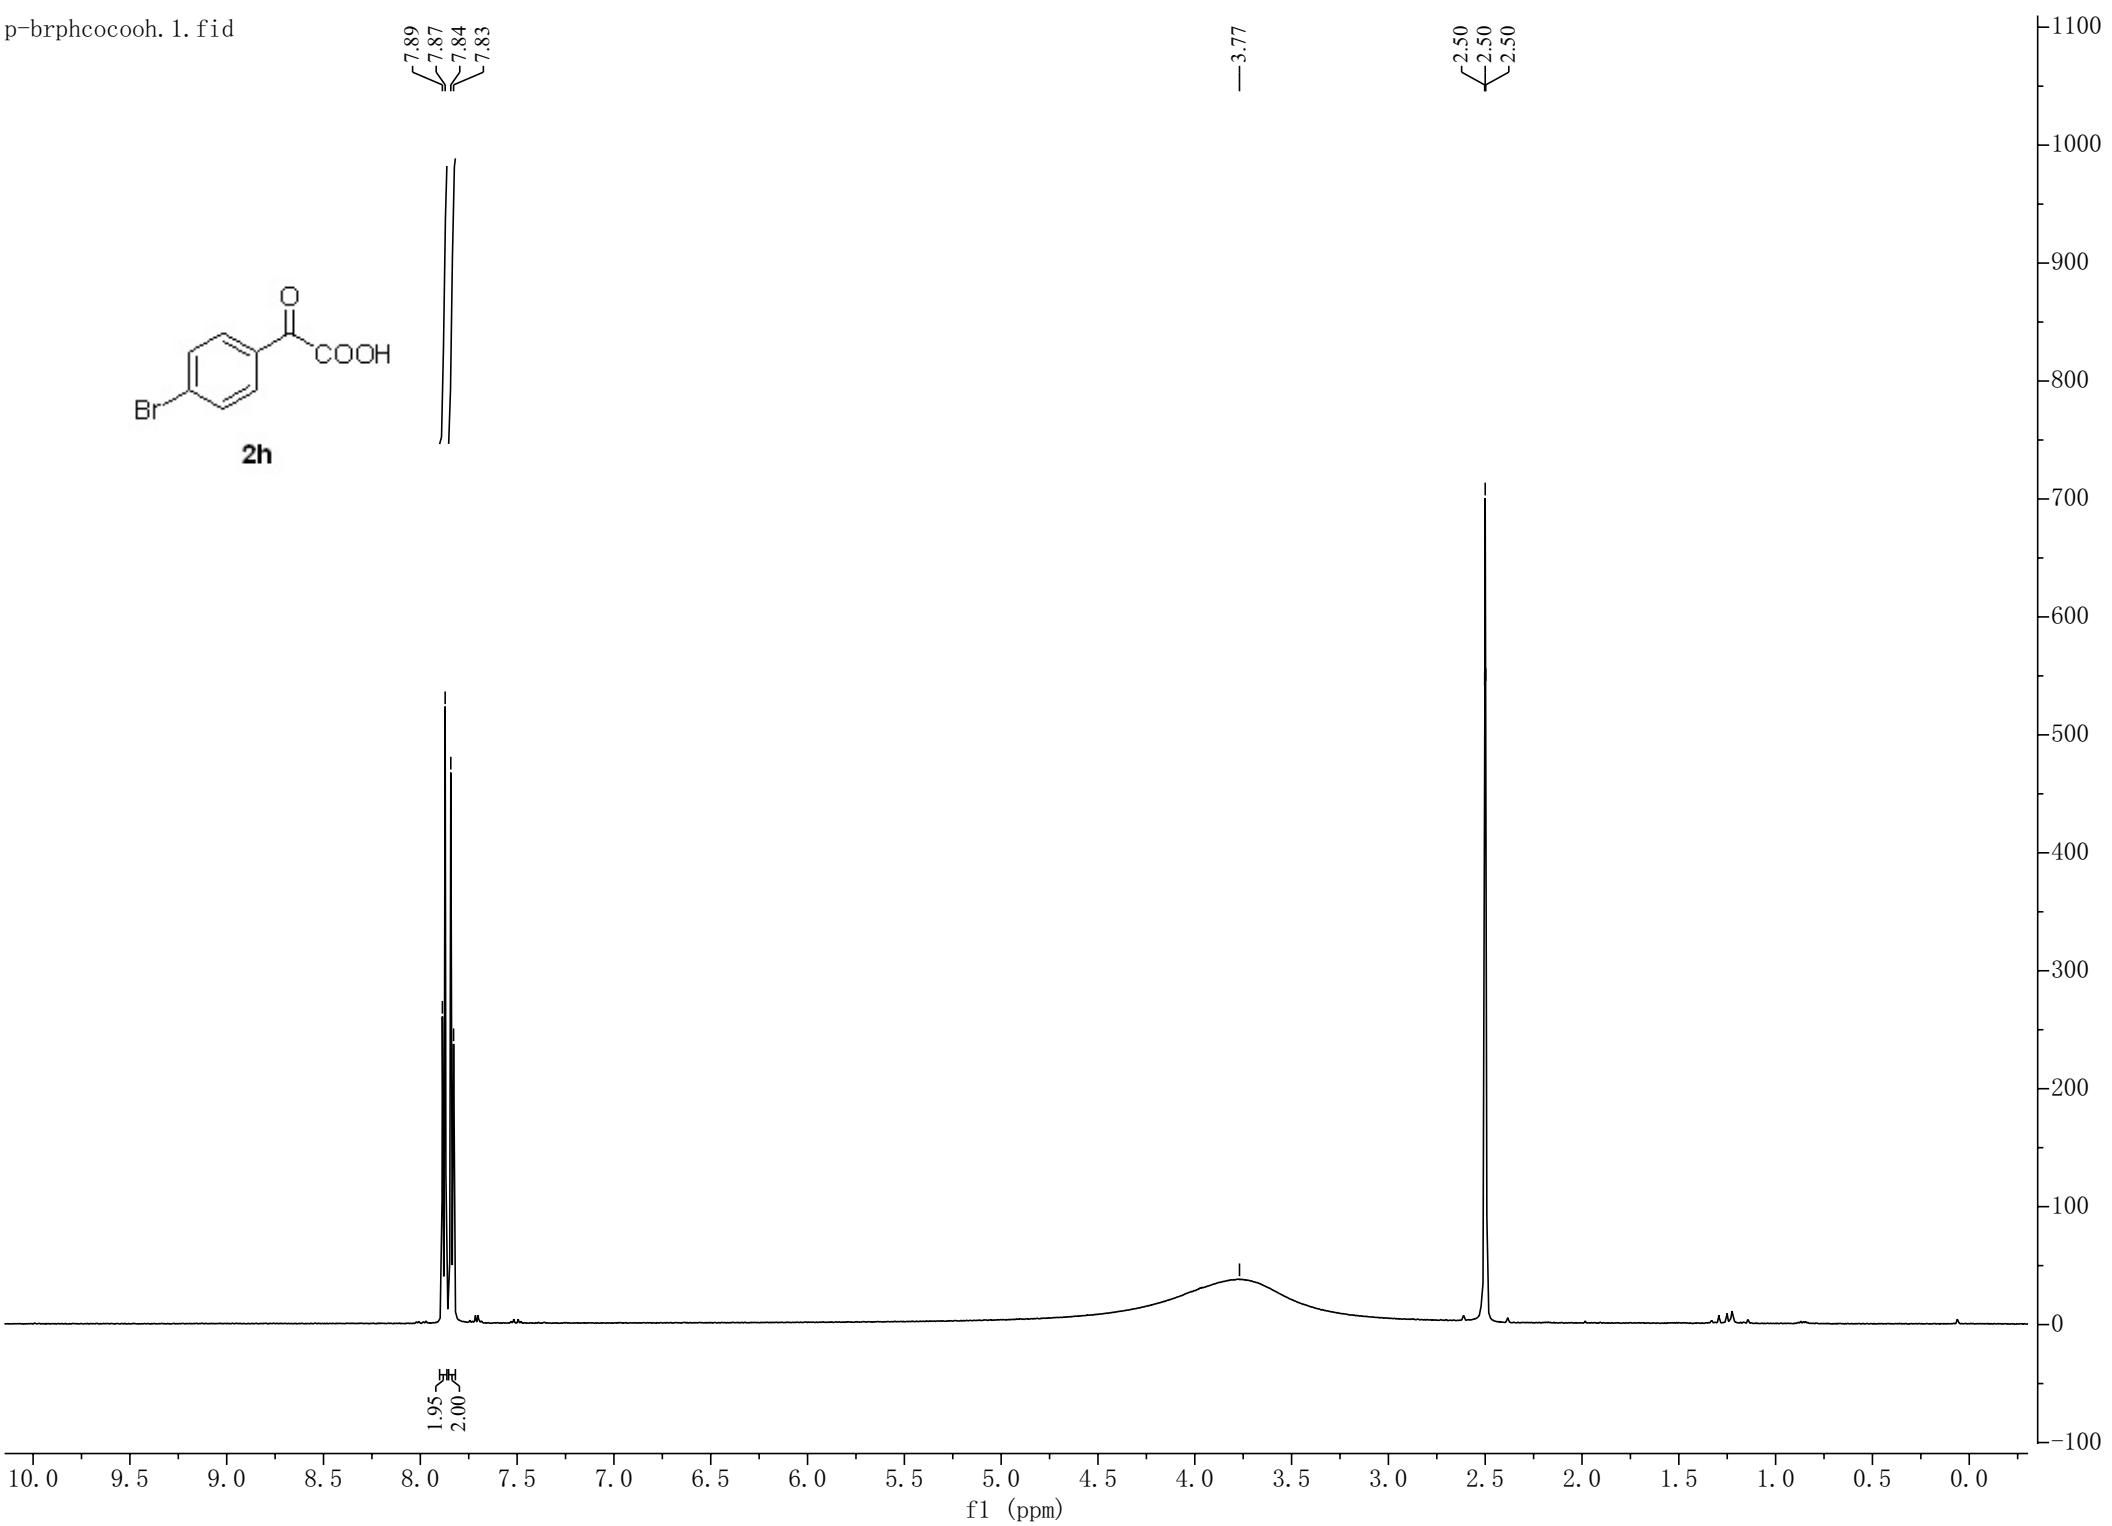

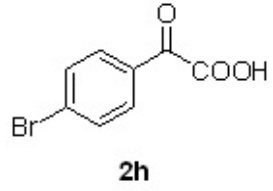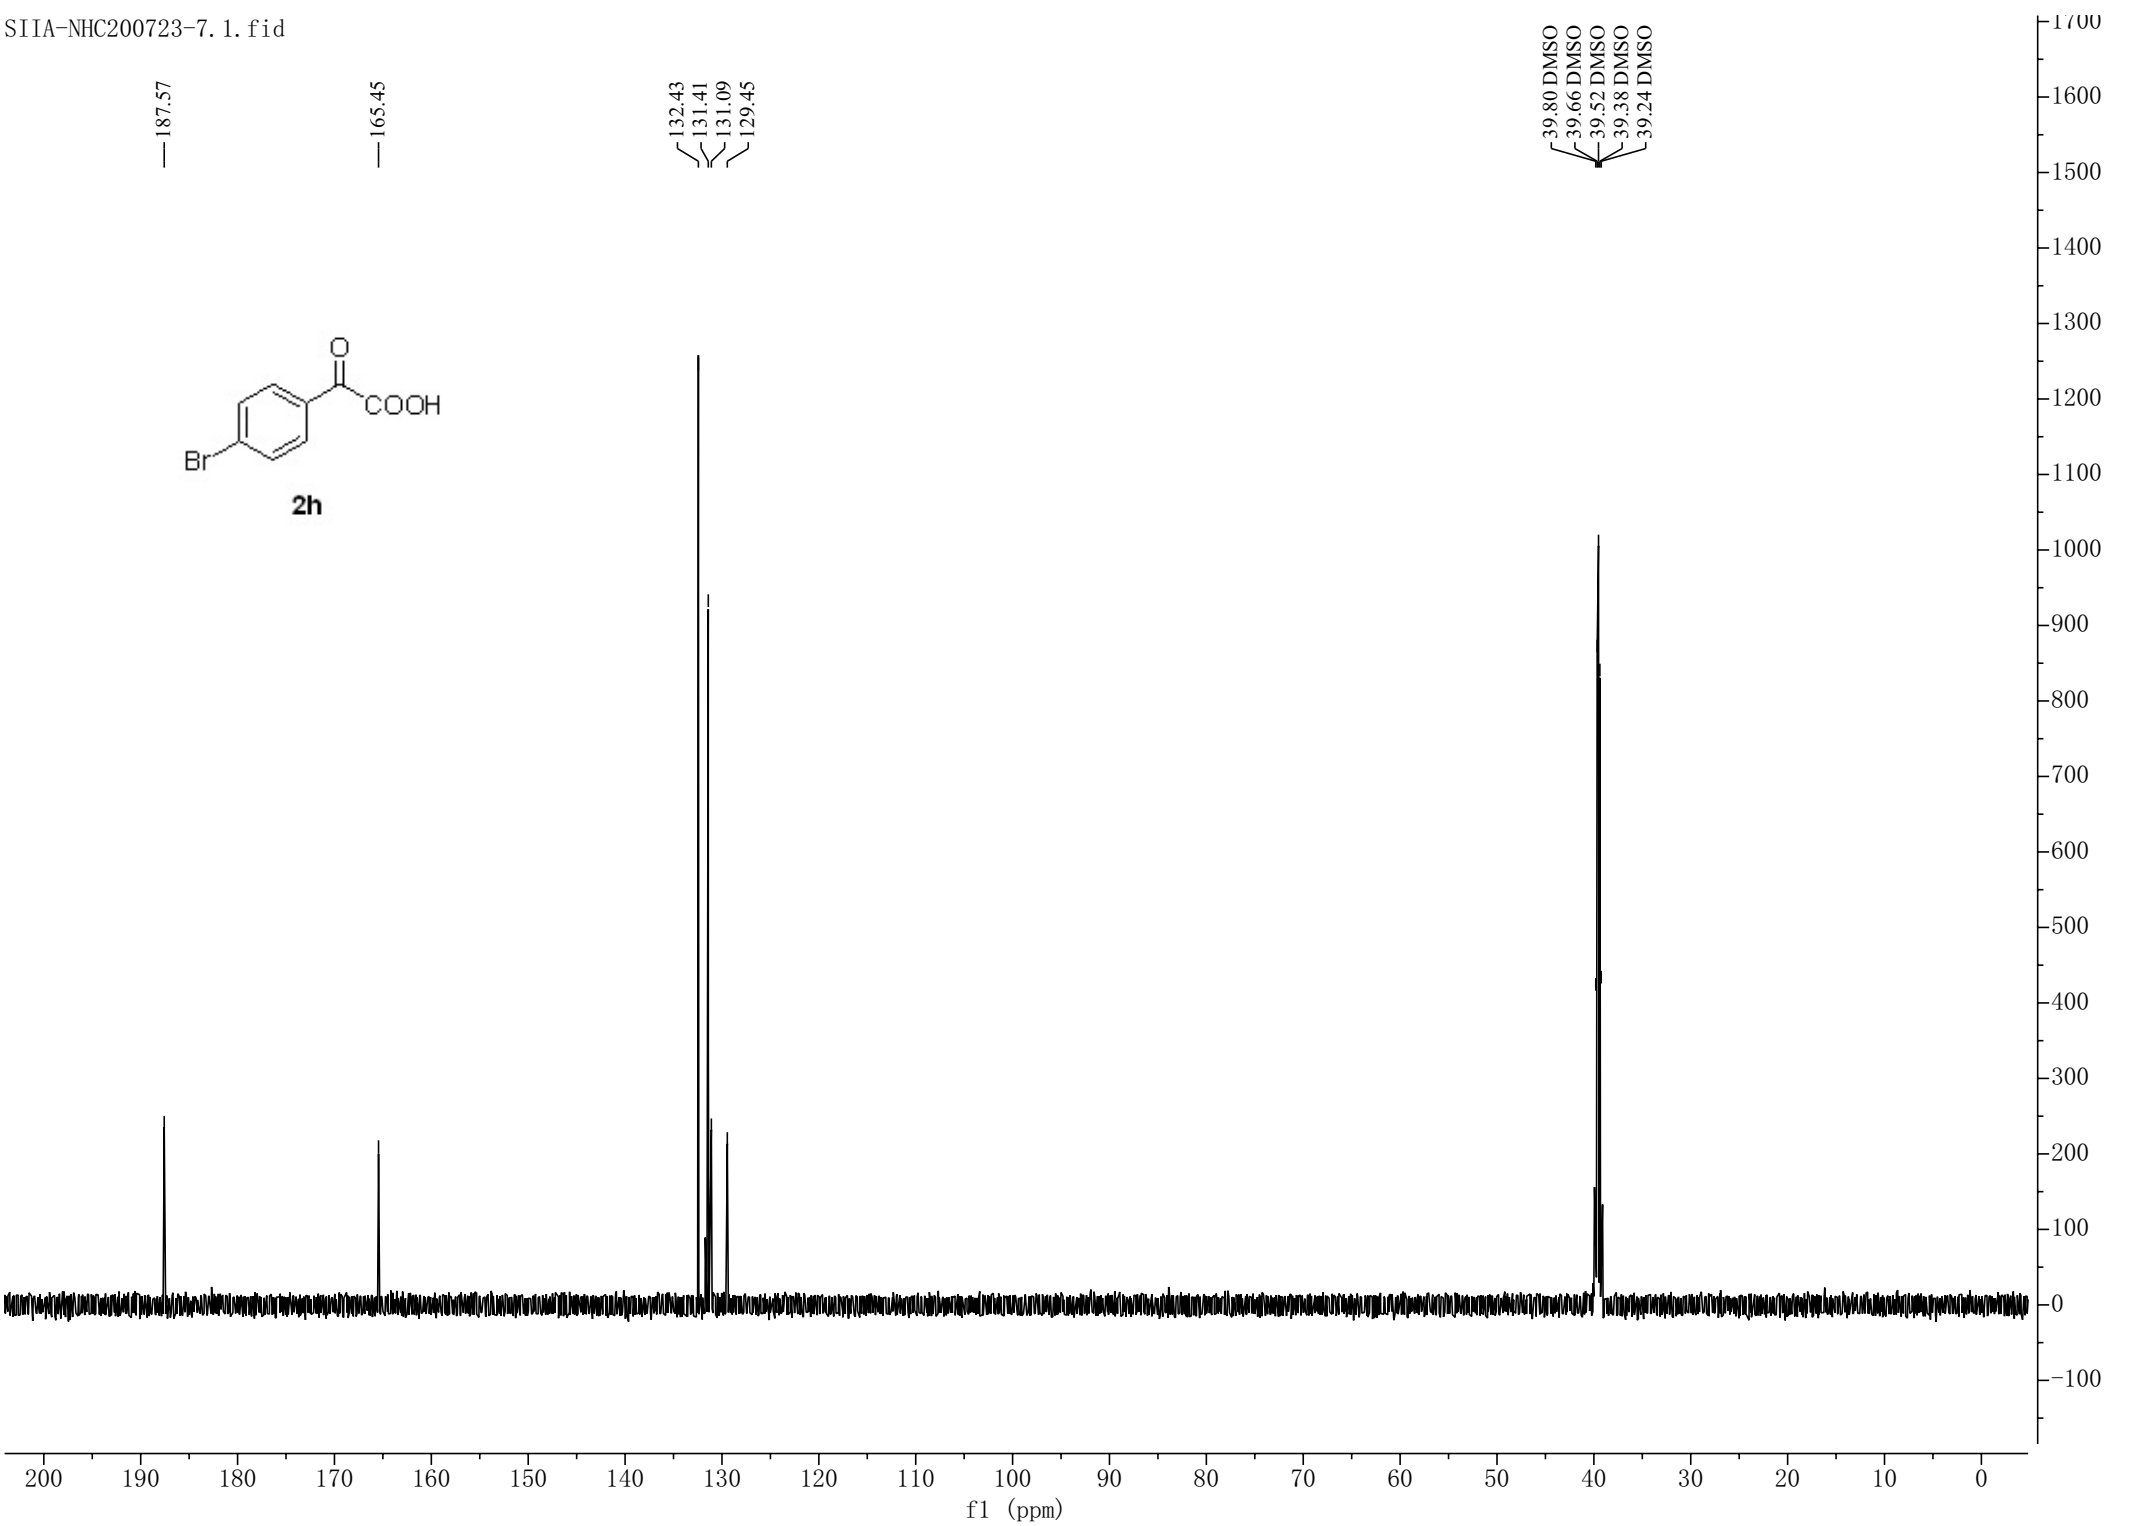

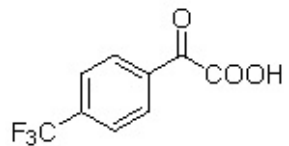

**2i**

8.17  
8.15  
7.99  
7.98

3.38

2.50

1.98  
2.00

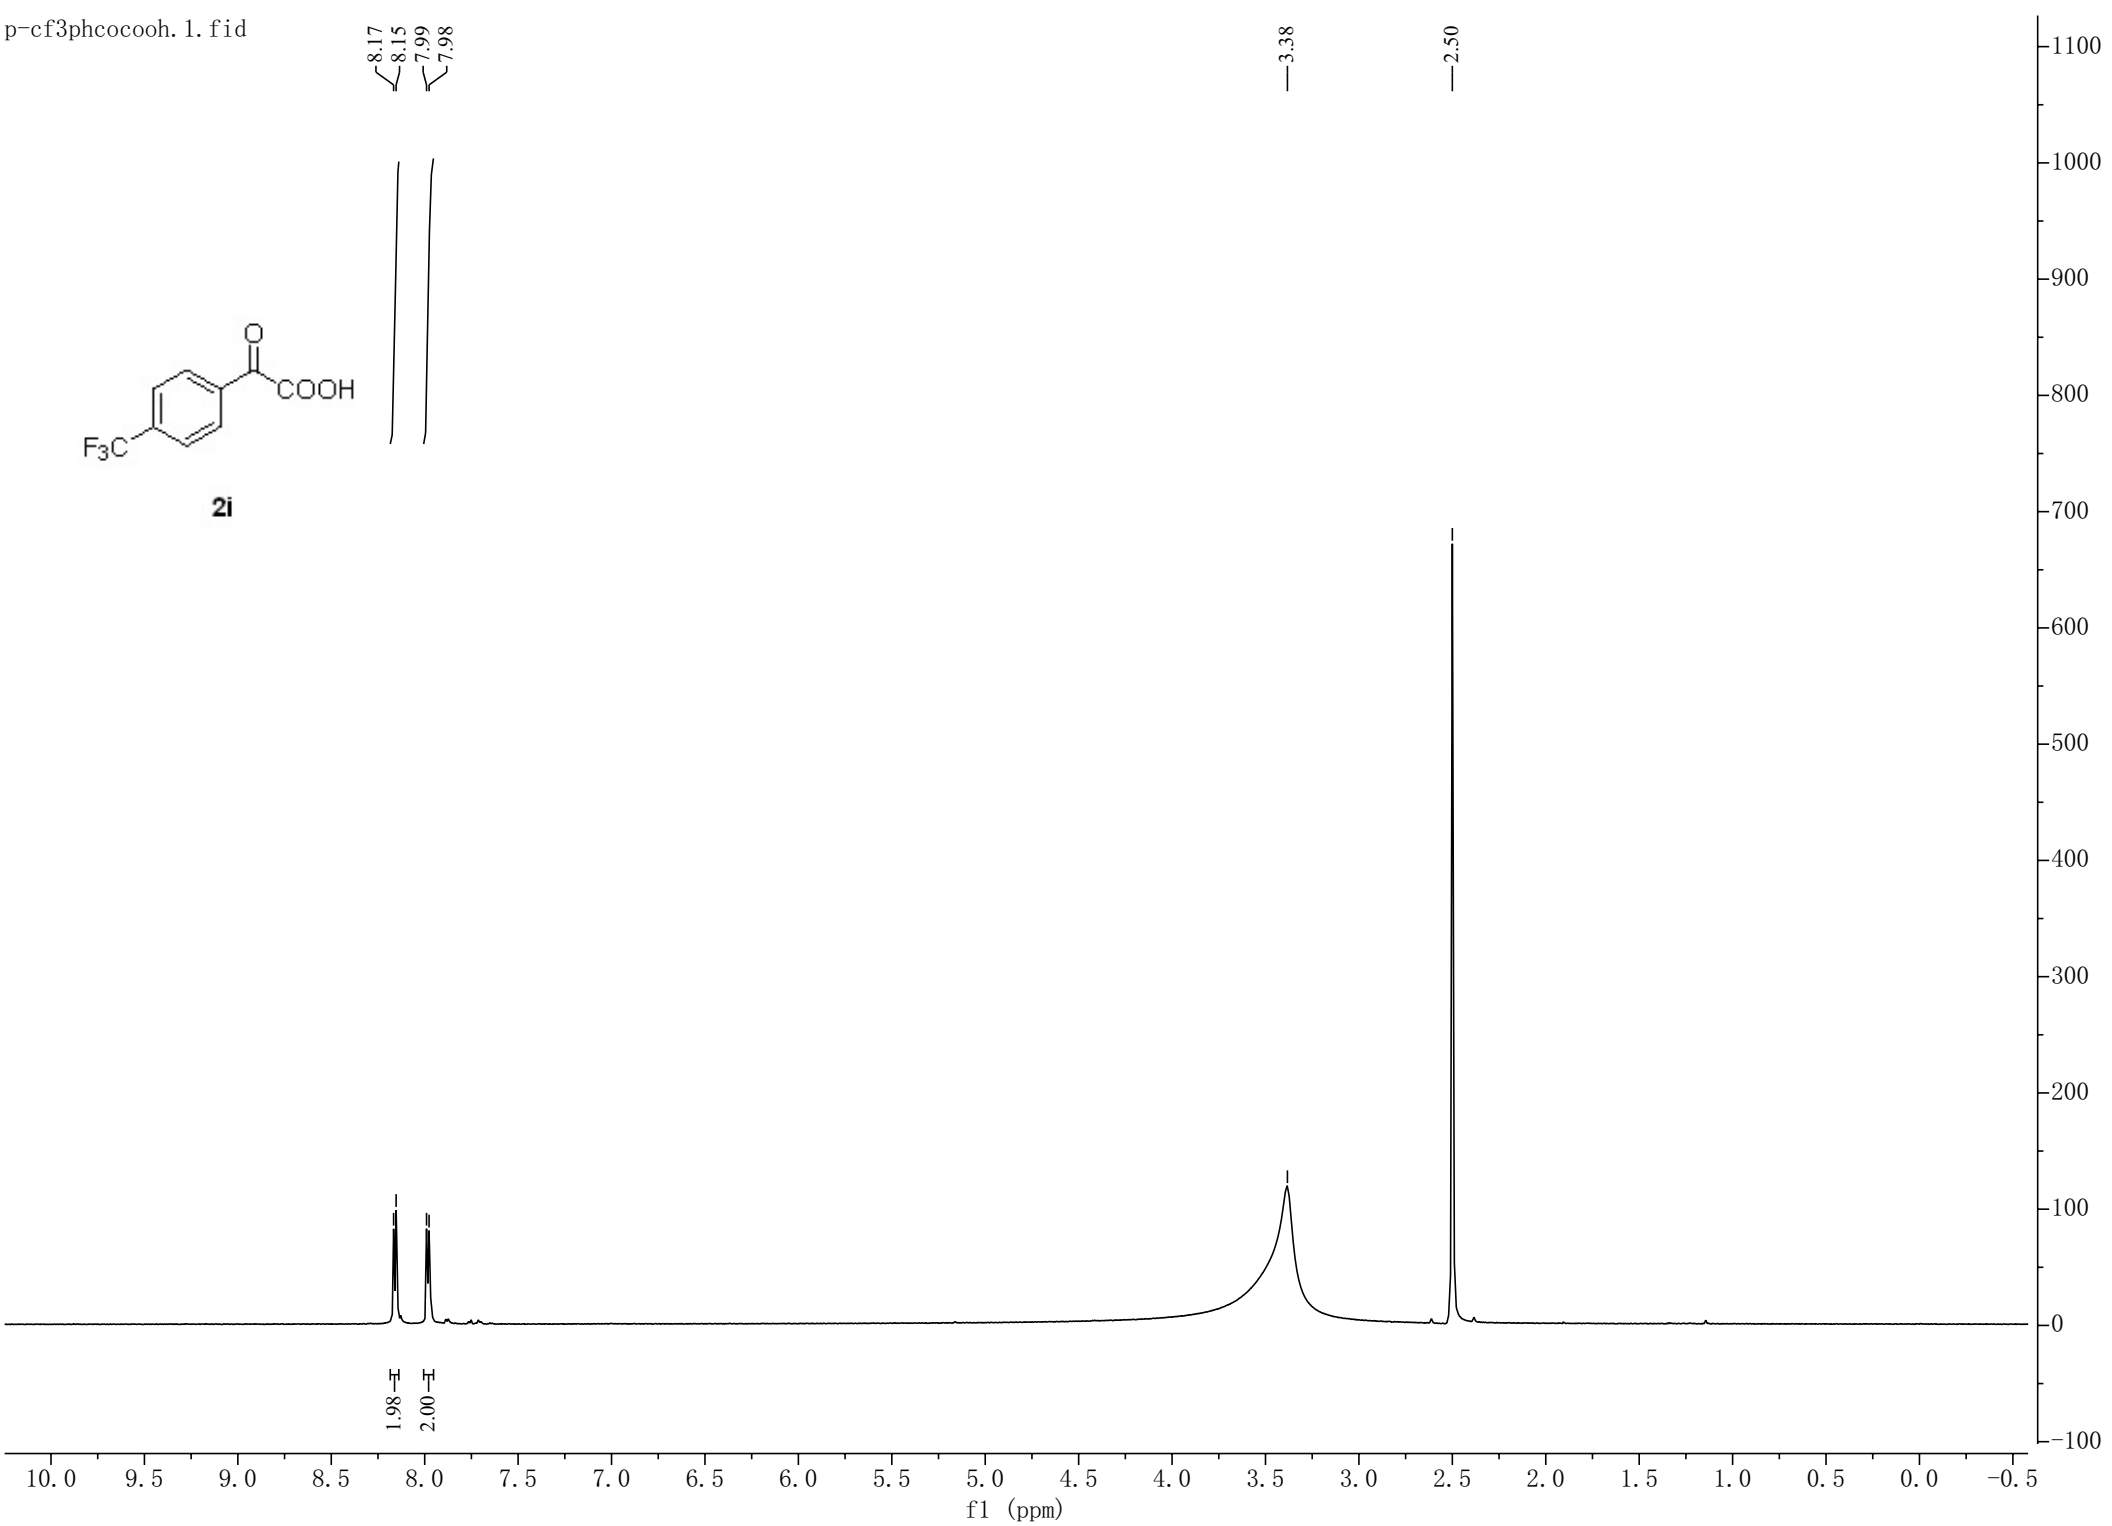

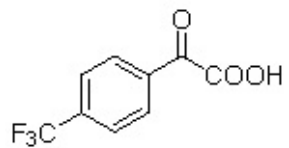

**2i**

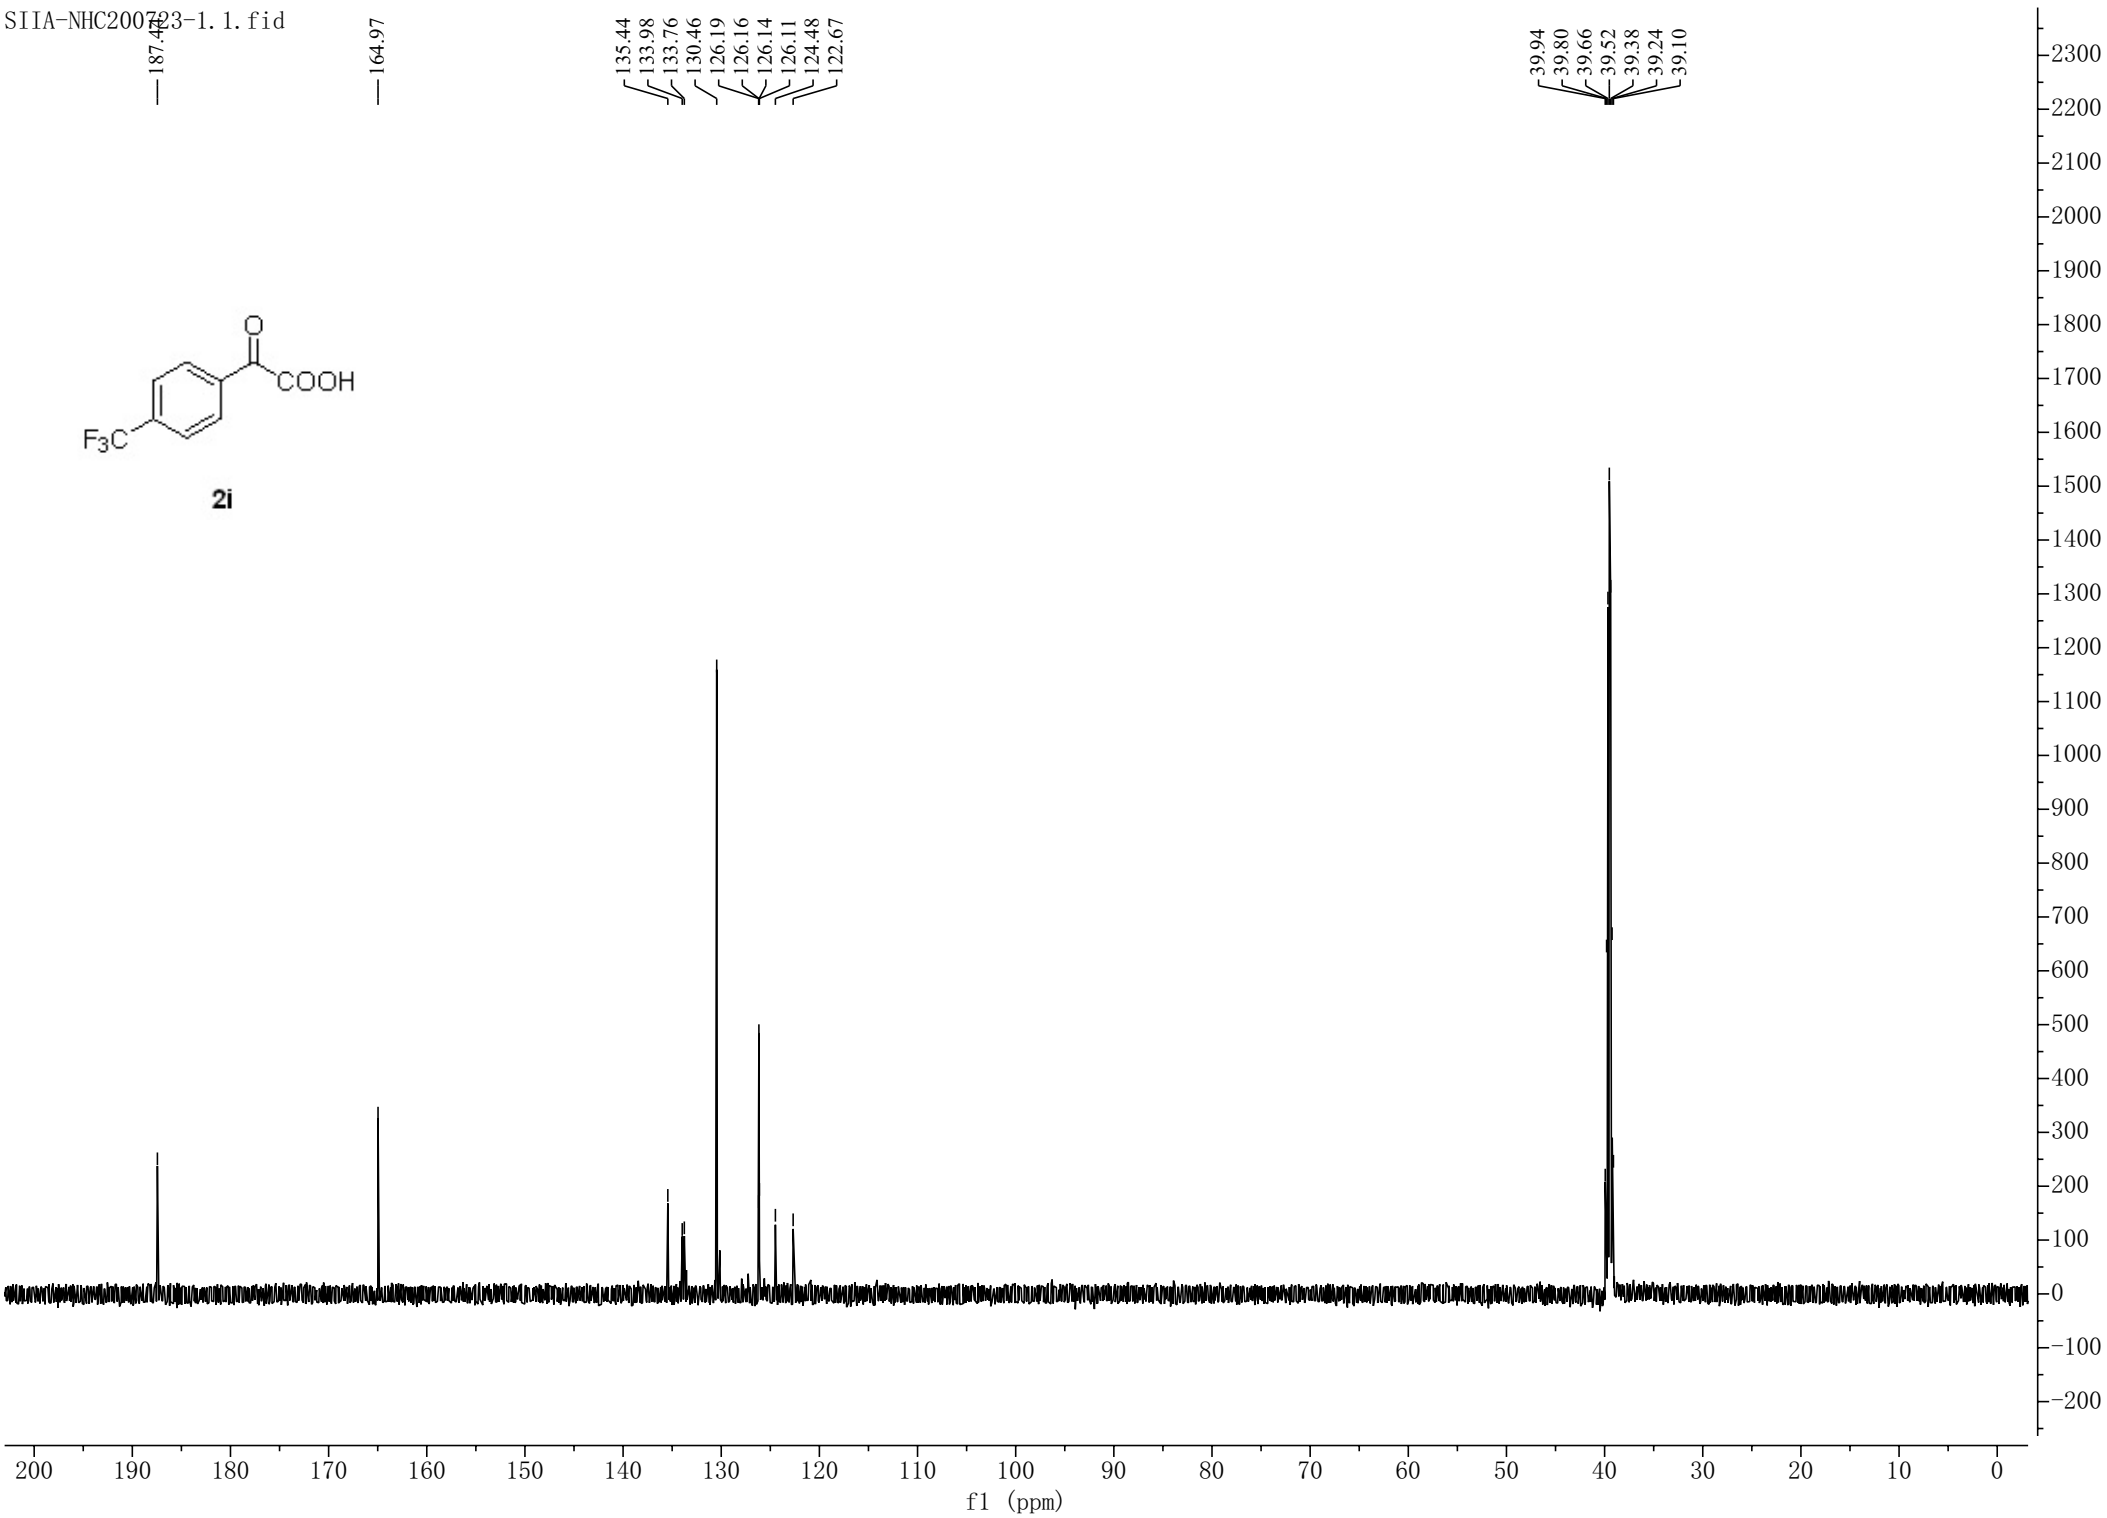

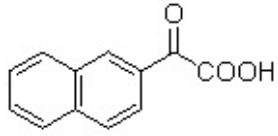

2j

8.60  
8.23  
8.22  
8.12  
8.11  
8.06  
8.04  
7.97  
7.97  
7.95  
7.76  
7.75  
7.73  
7.68  
7.67  
7.66

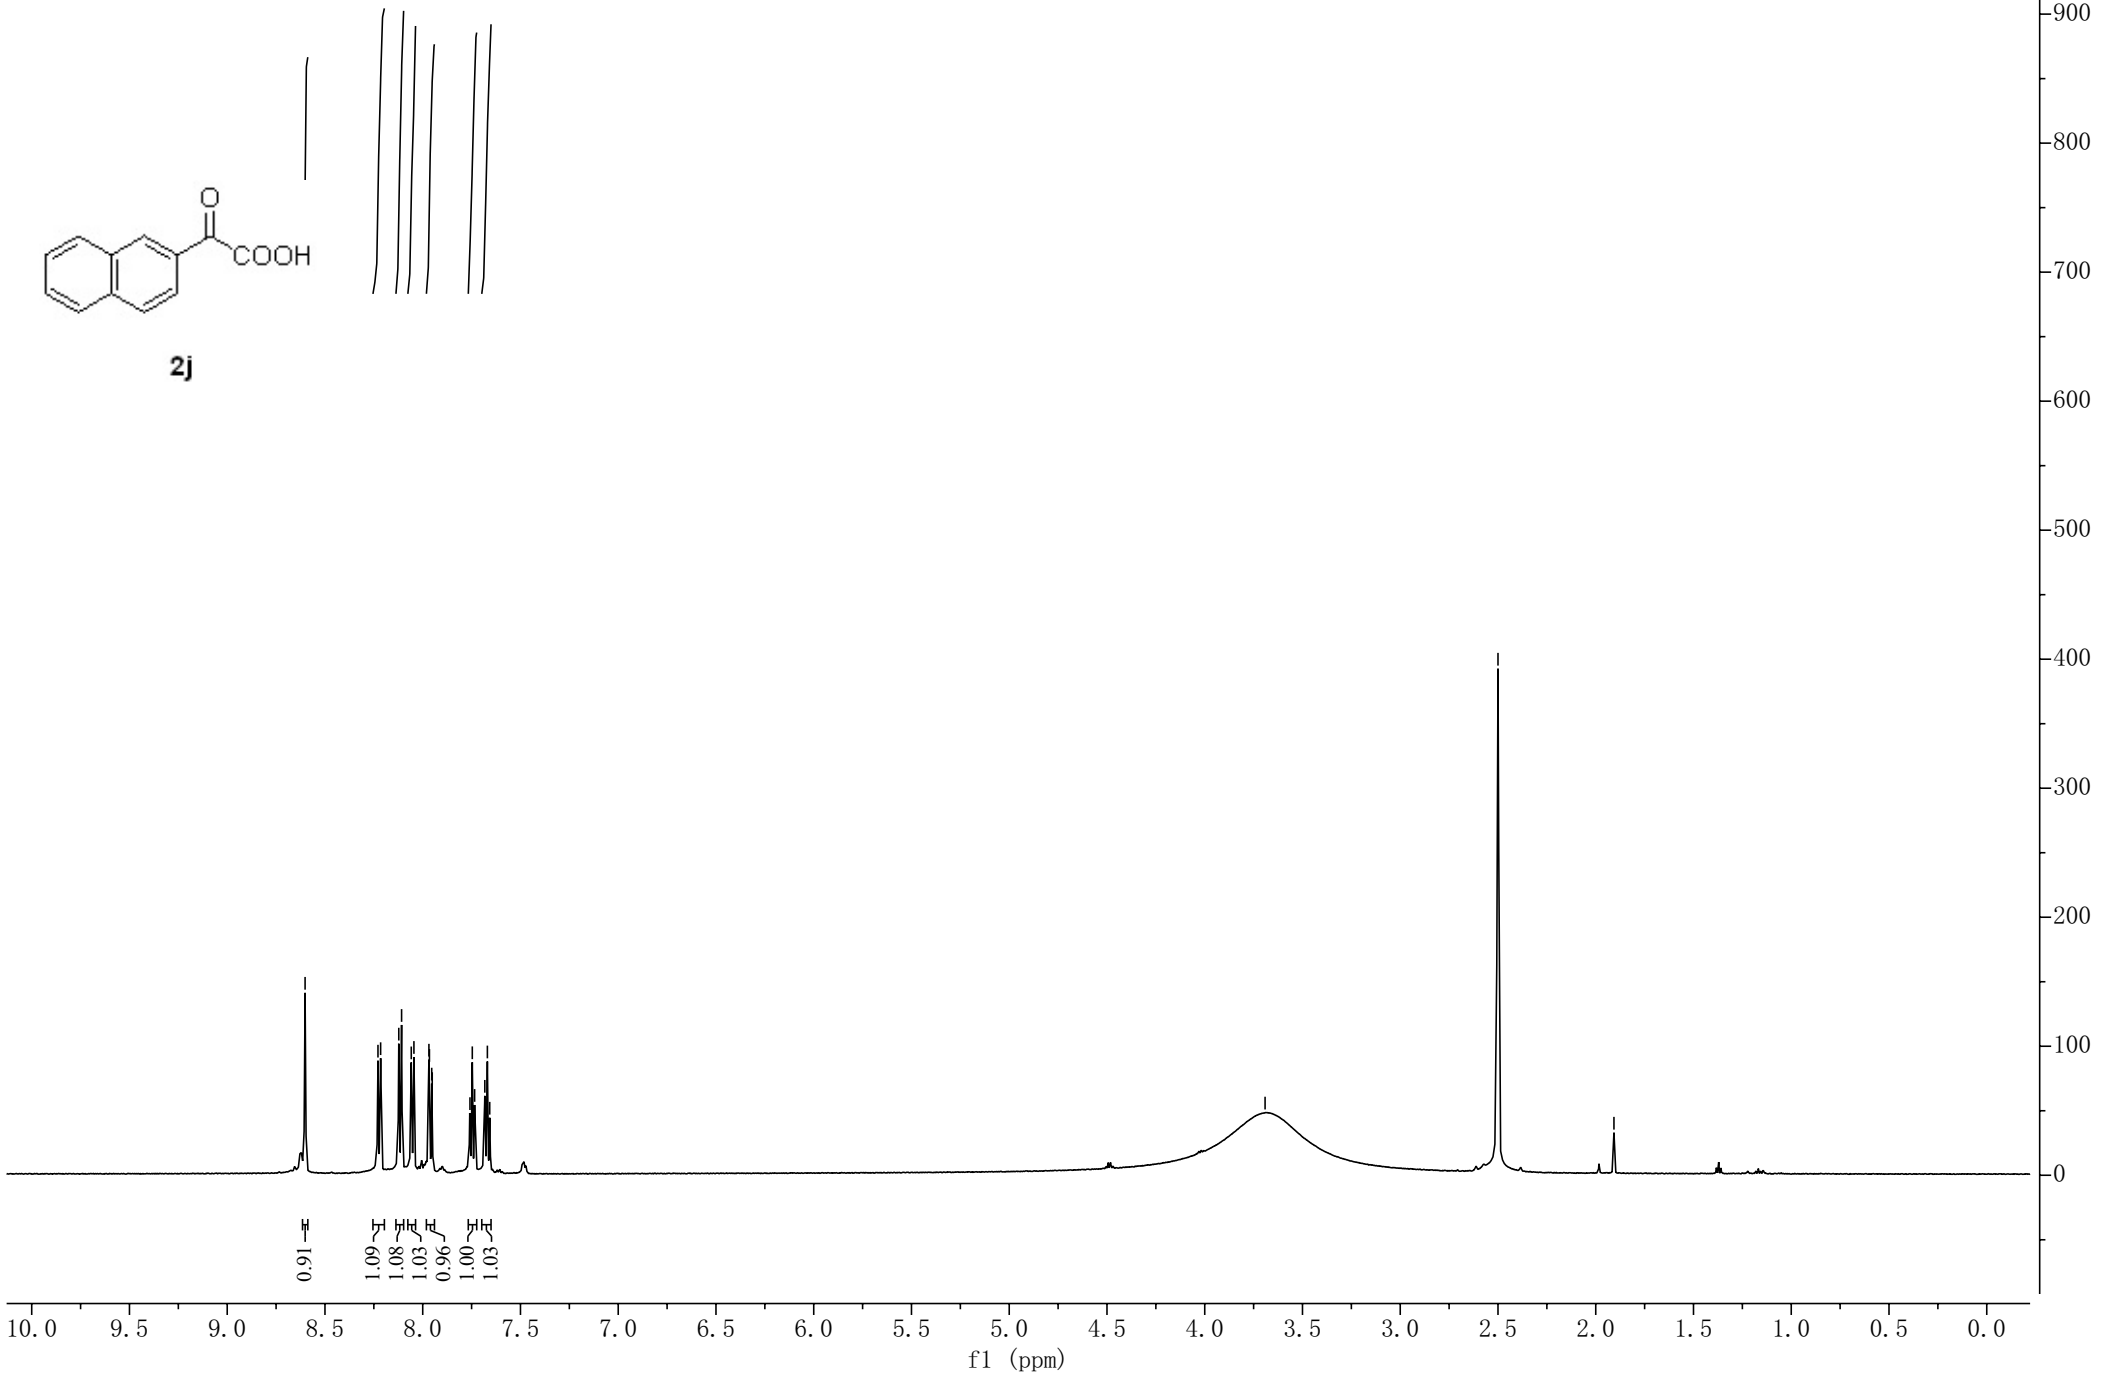

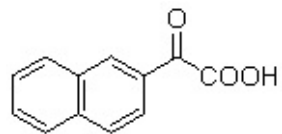

2j

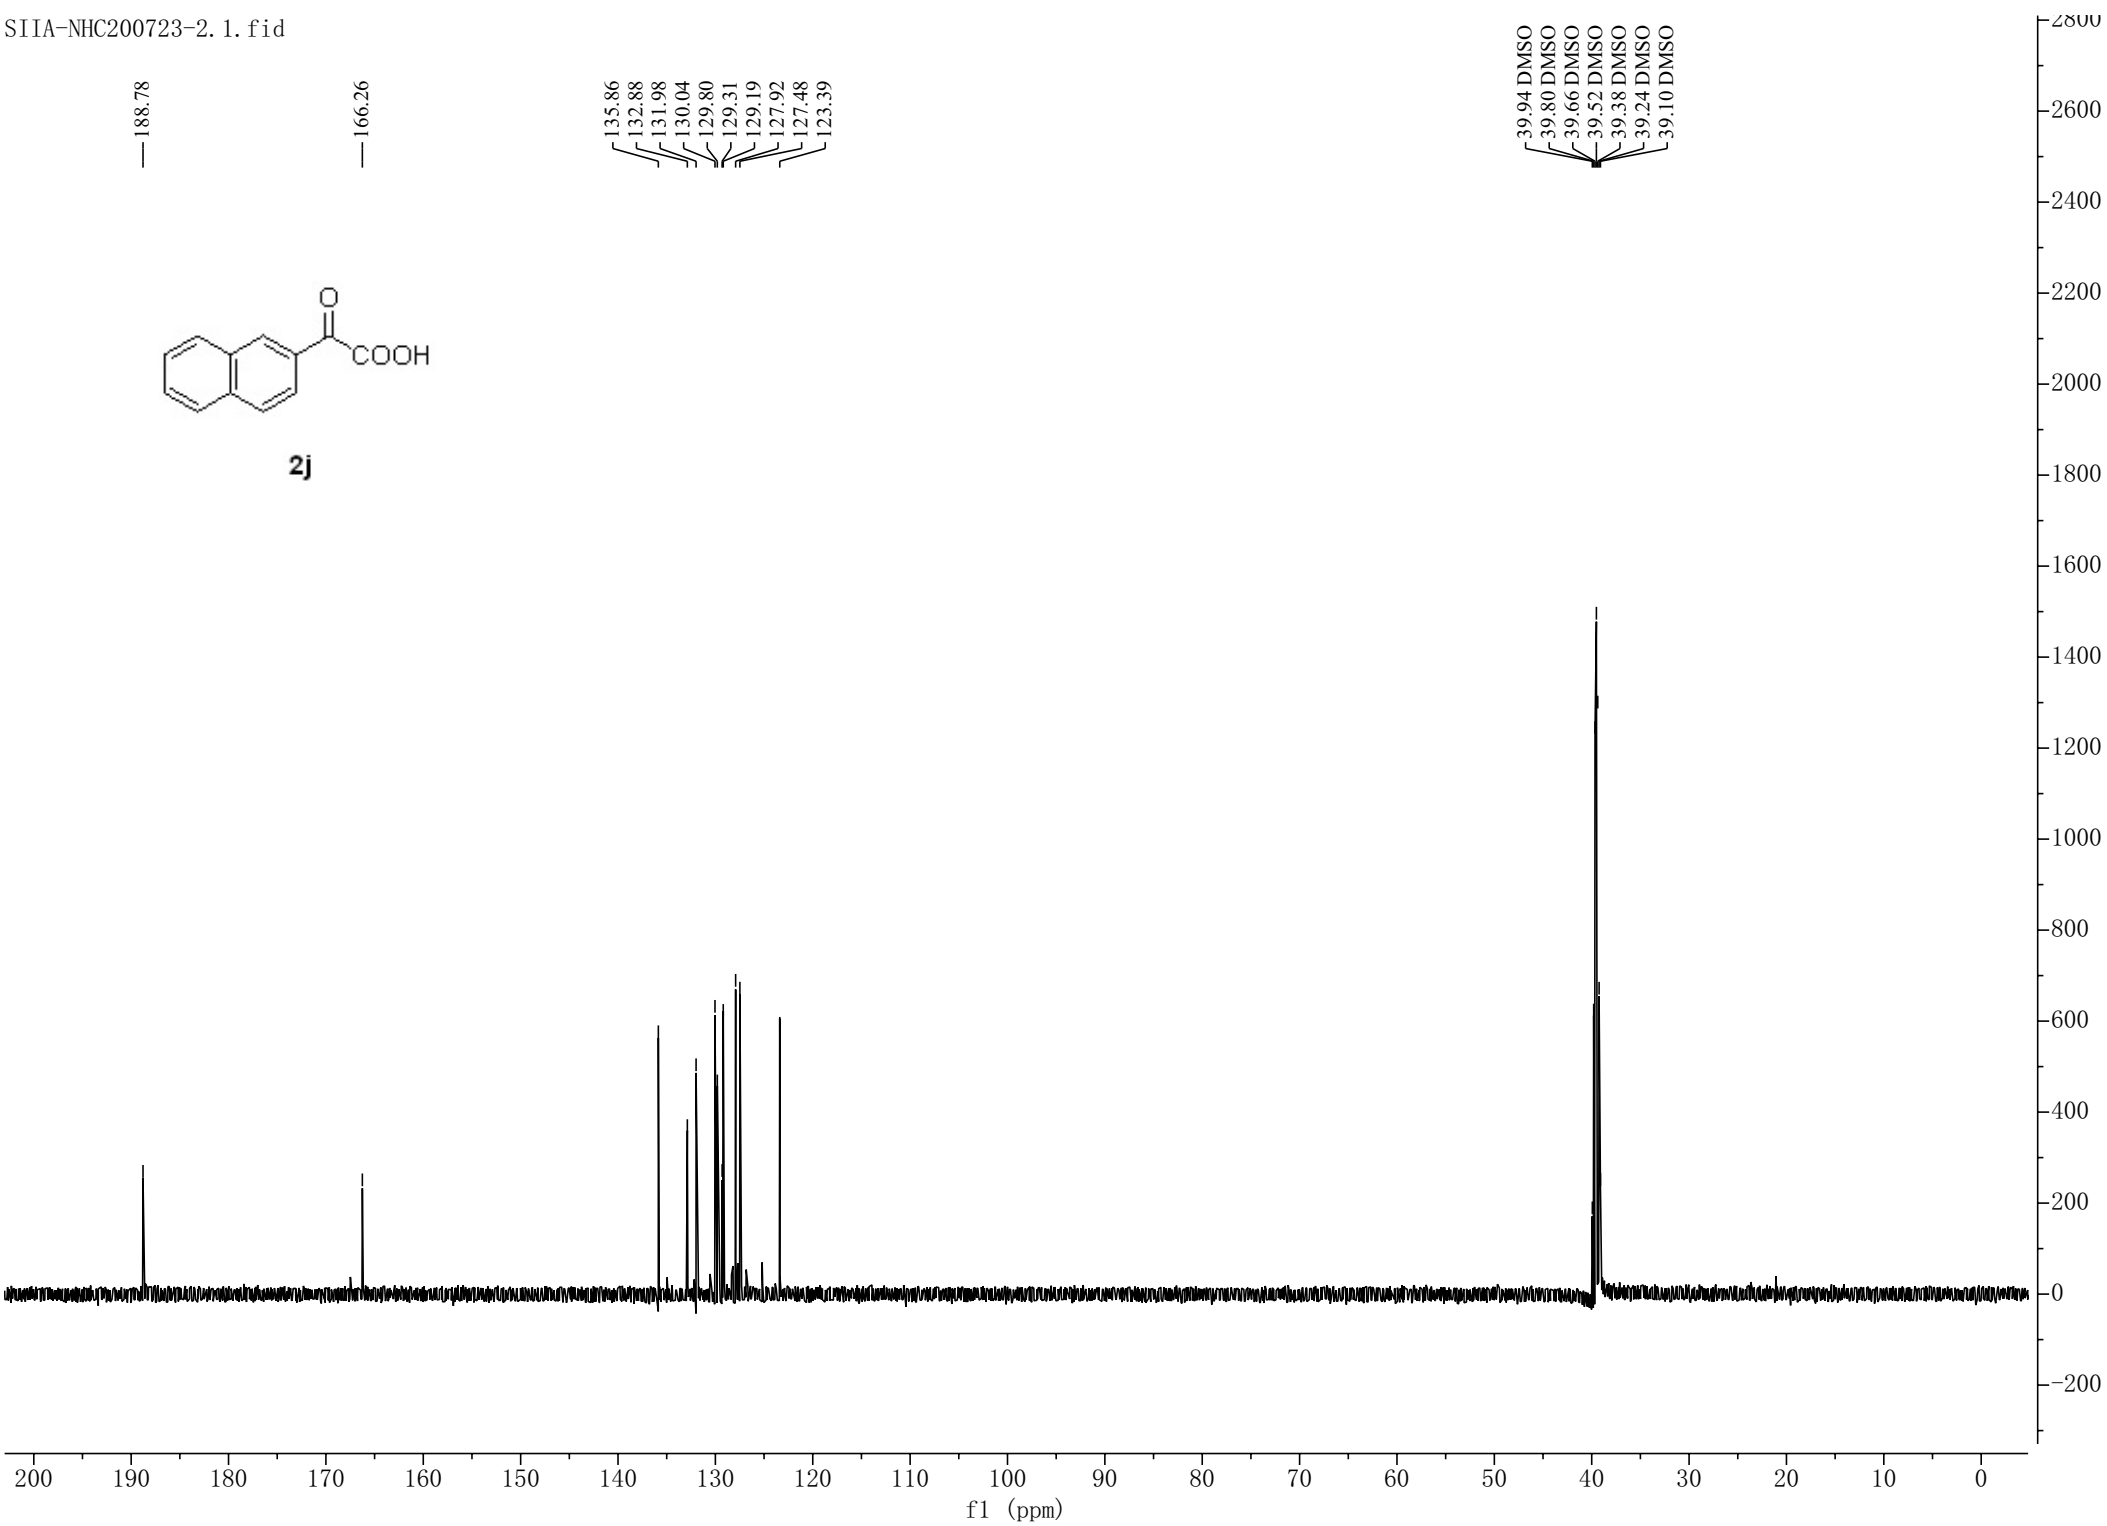

hc200519-1-napcocooh 1. 11

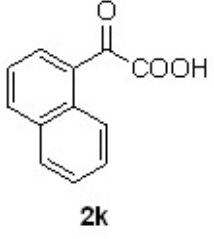

8.94  
8.94  
8.34  
8.34  
8.11  
8.10  
8.08  
8.07  
7.77  
7.76  
7.75  
7.73  
7.72  
7.71  
7.69  
7.68  
7.67

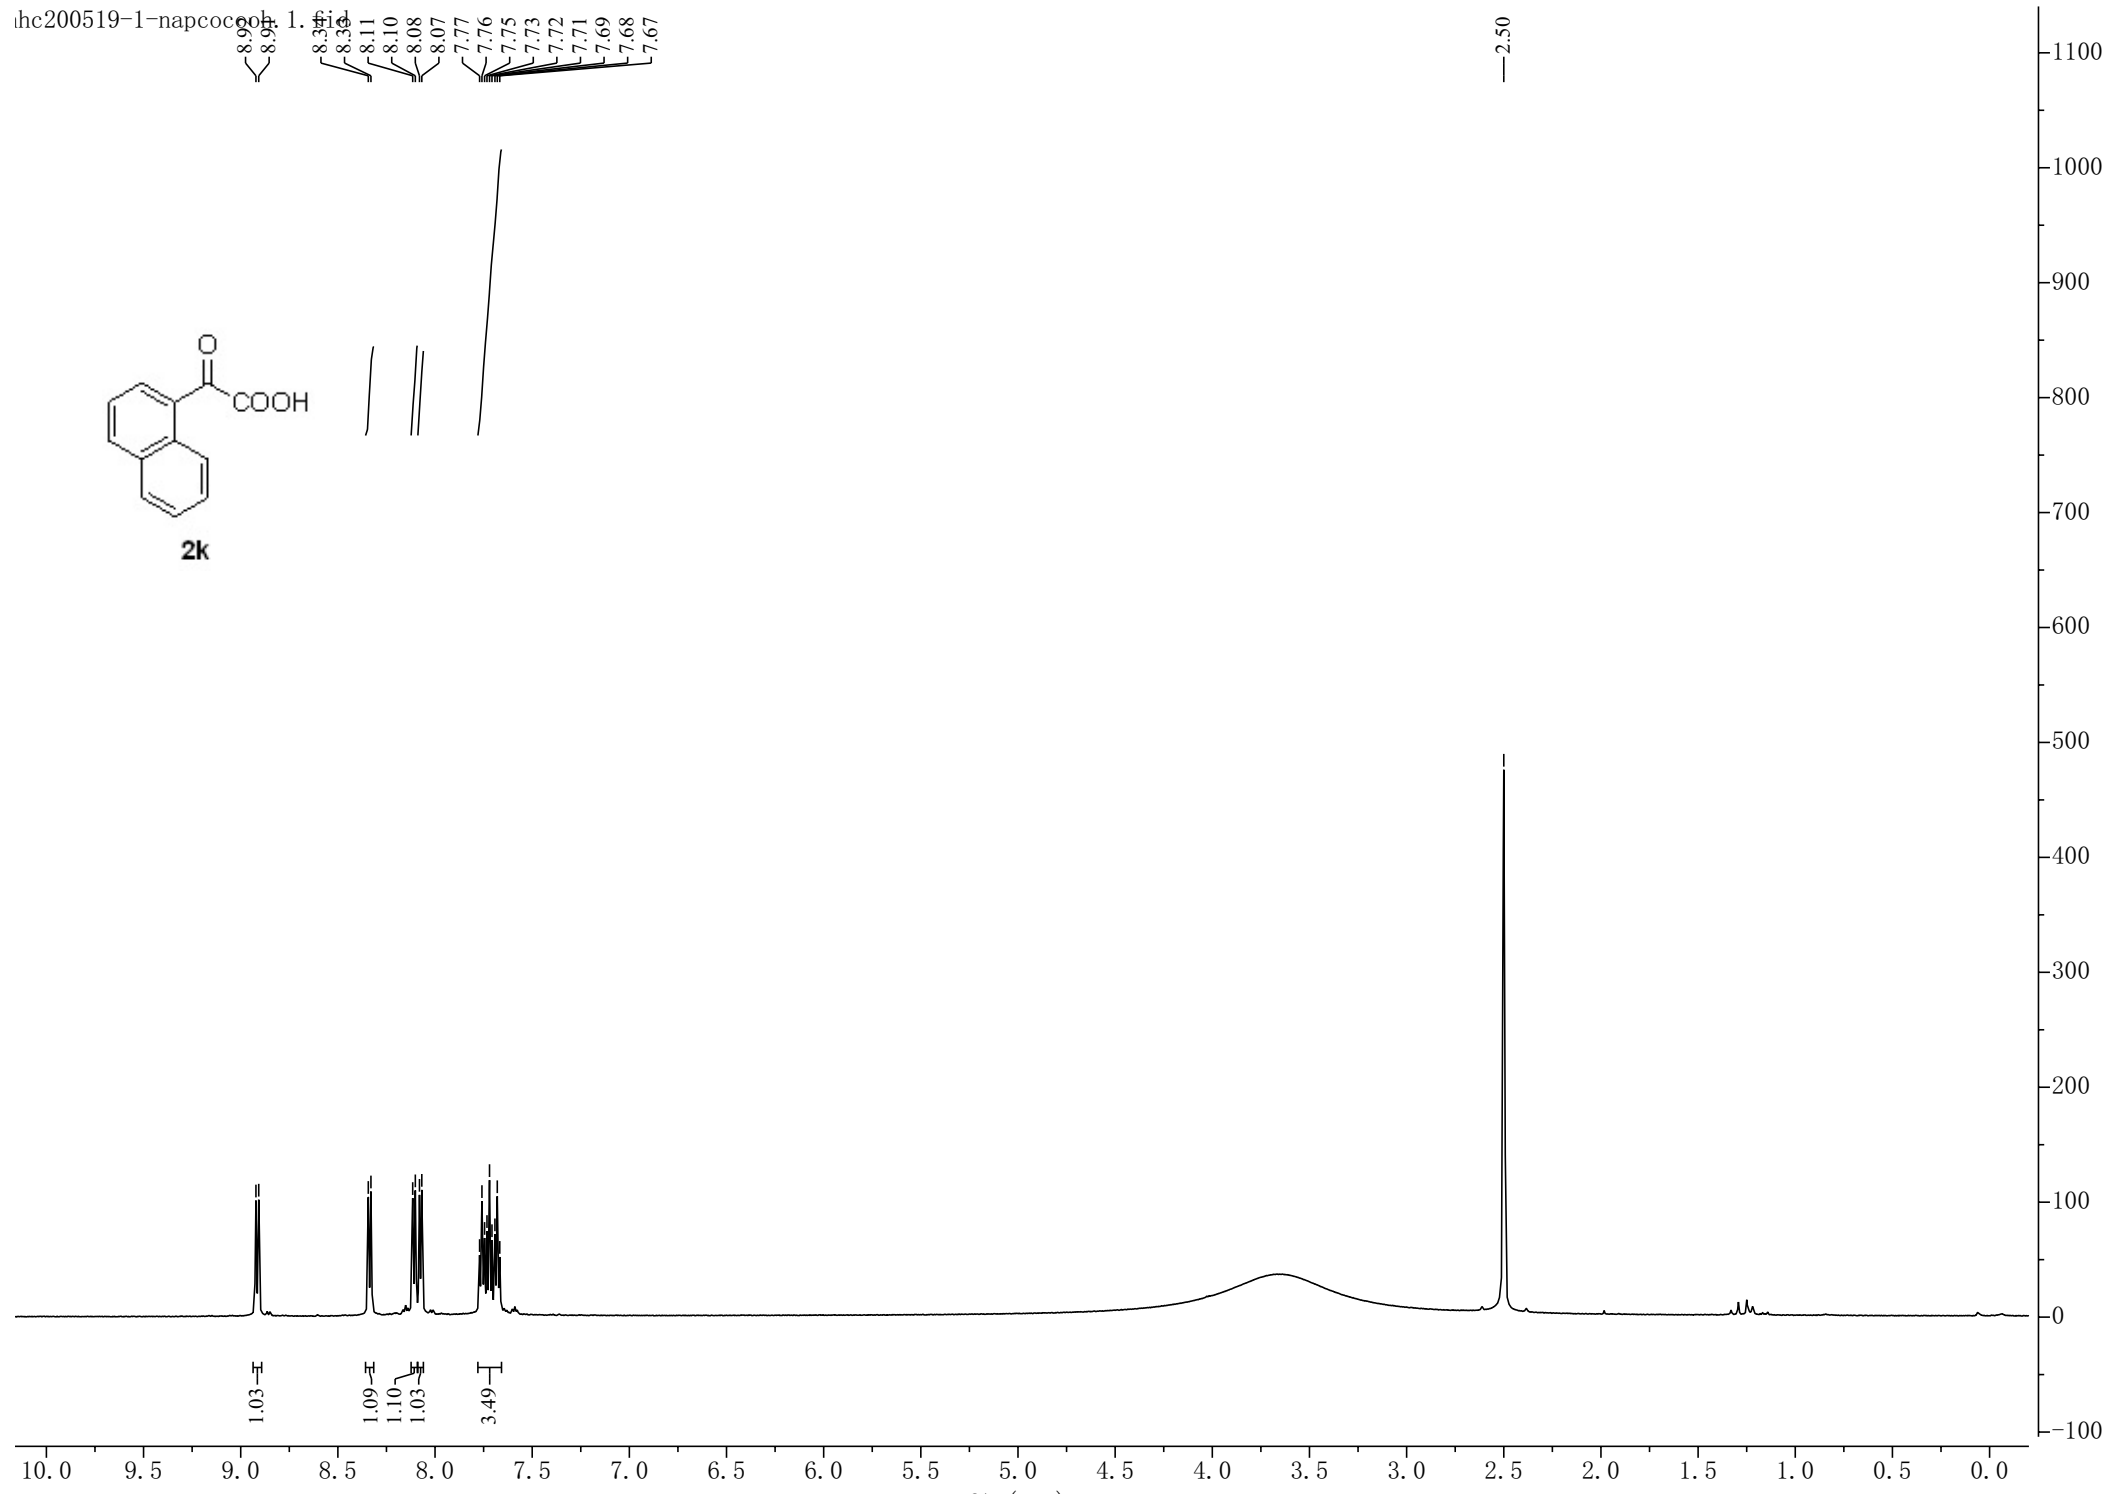

— 191.26 — 166.53

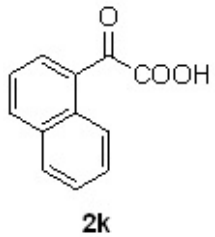

135.82  
135.81  
134.13  
133.62  
130.12  
129.33  
129.11  
127.54  
127.12  
125.04  
124.76

39.94  
39.80  
39.66  
39.52  
39.38  
39.24  
39.10

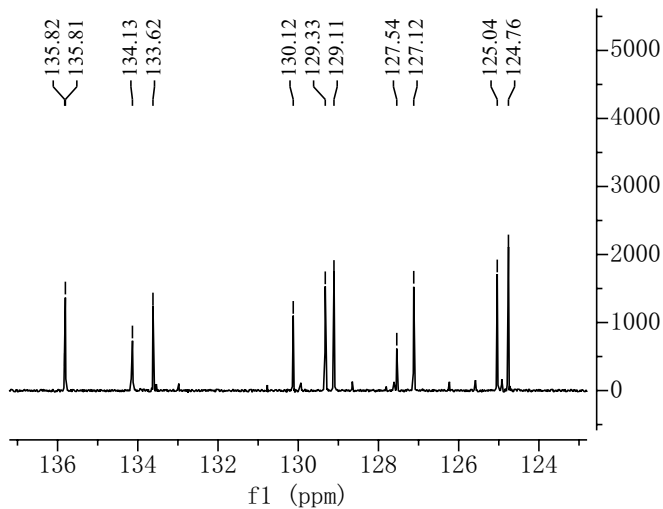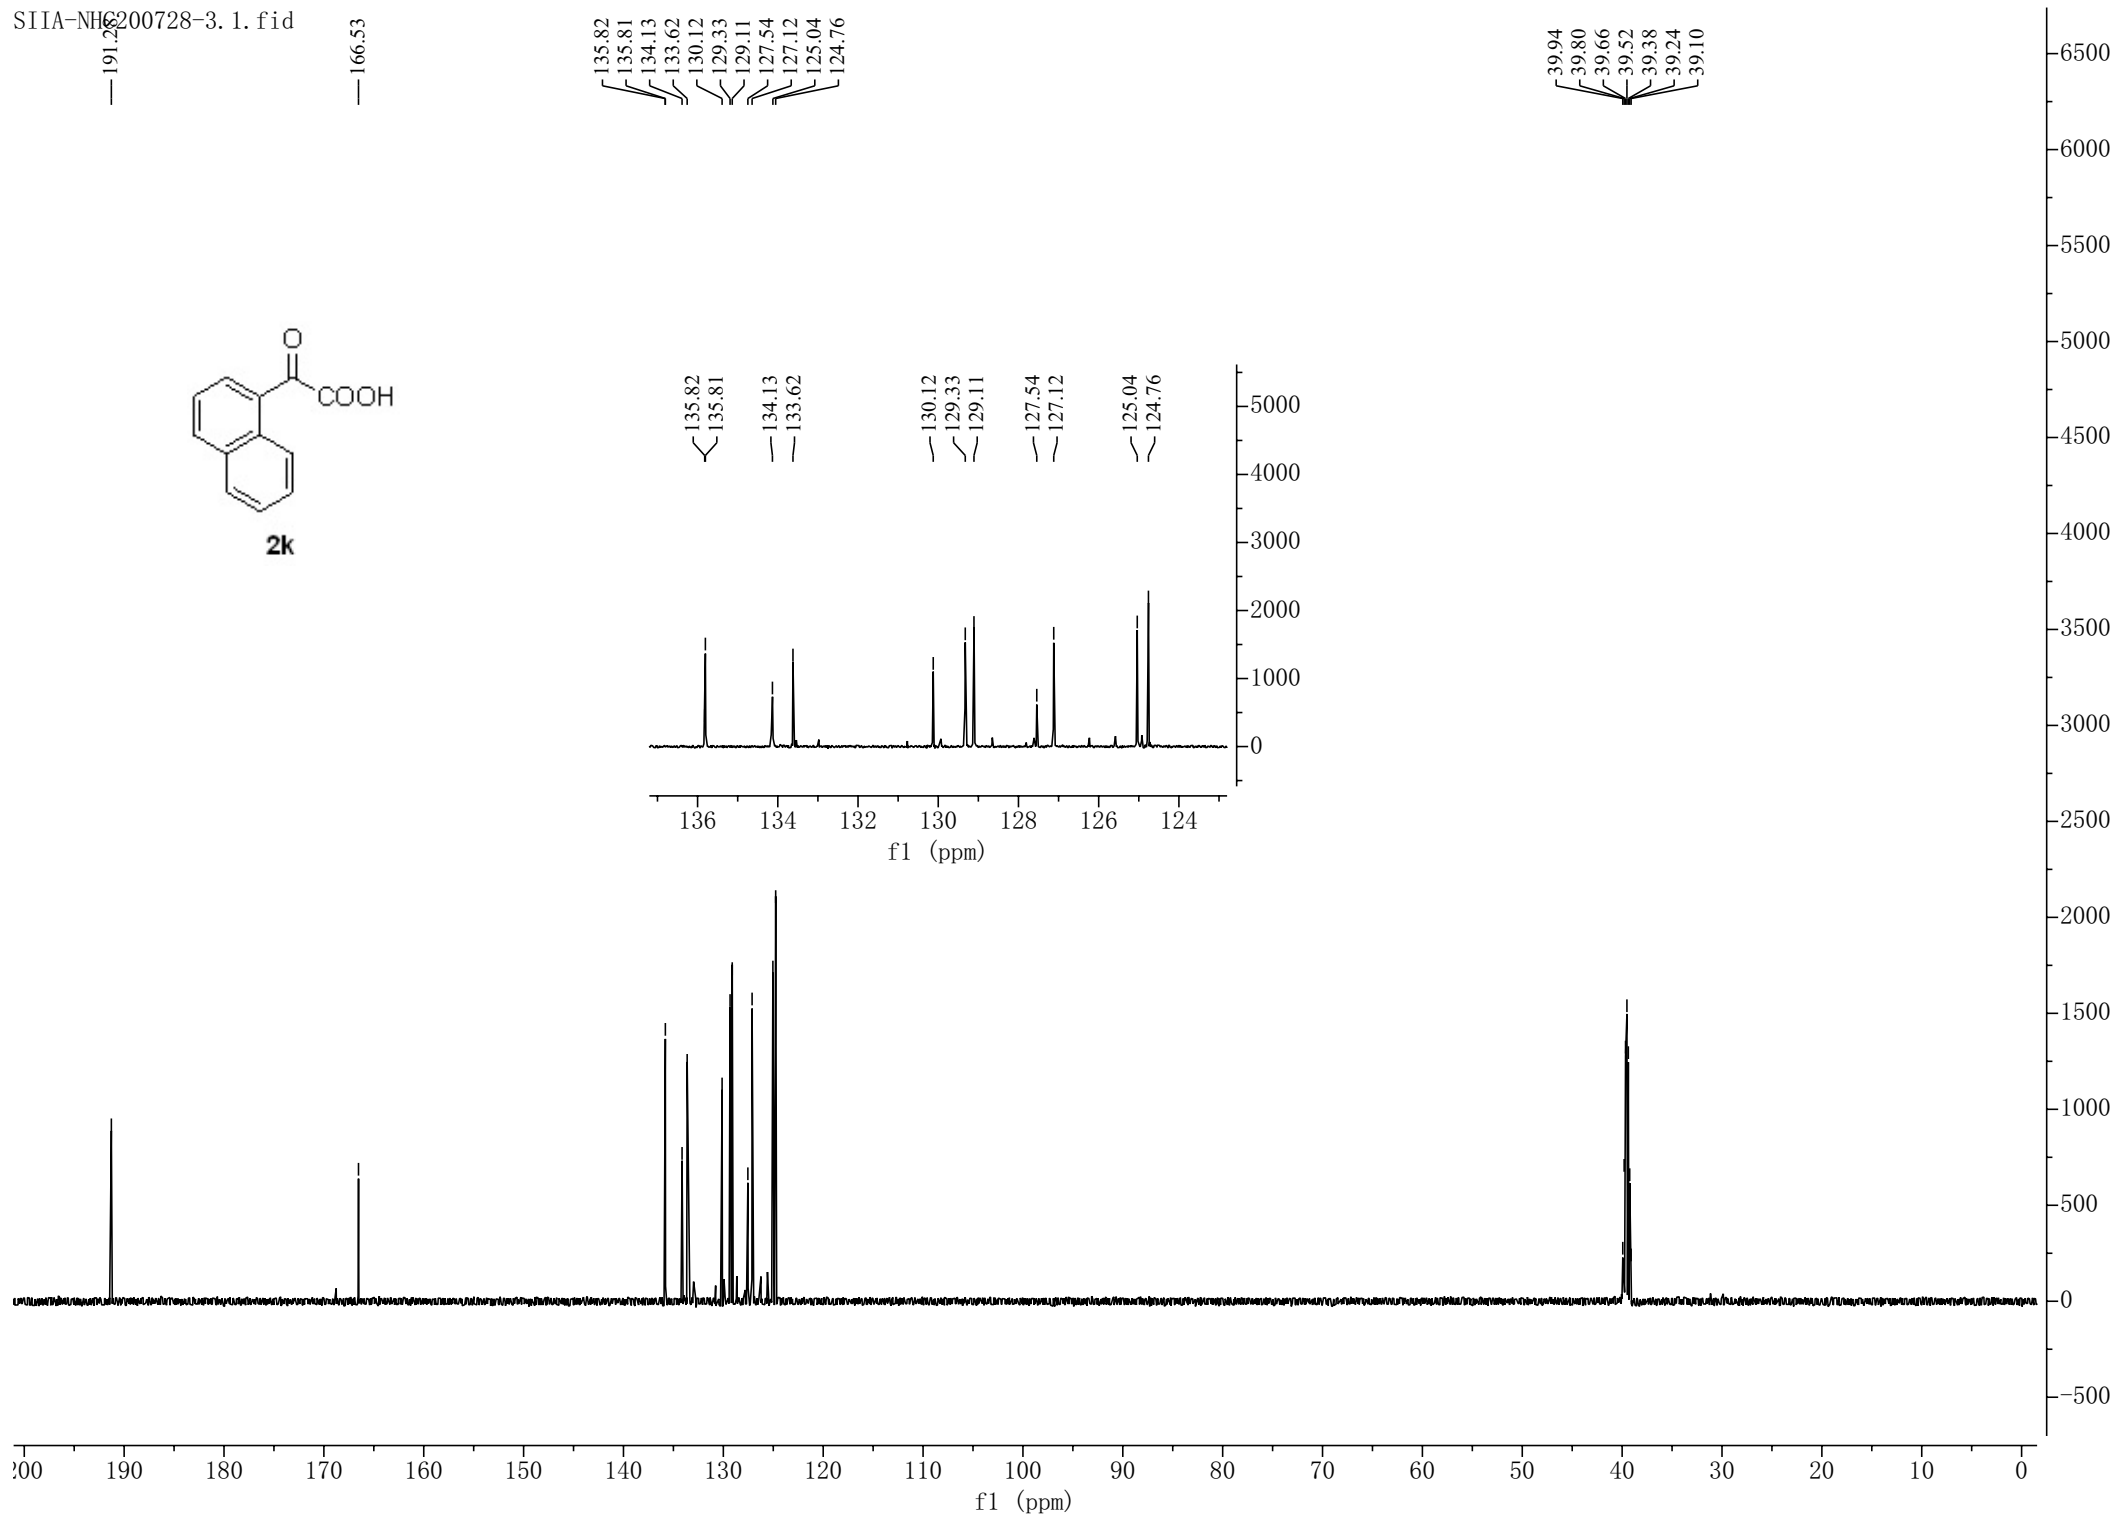



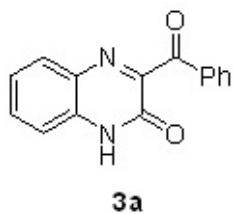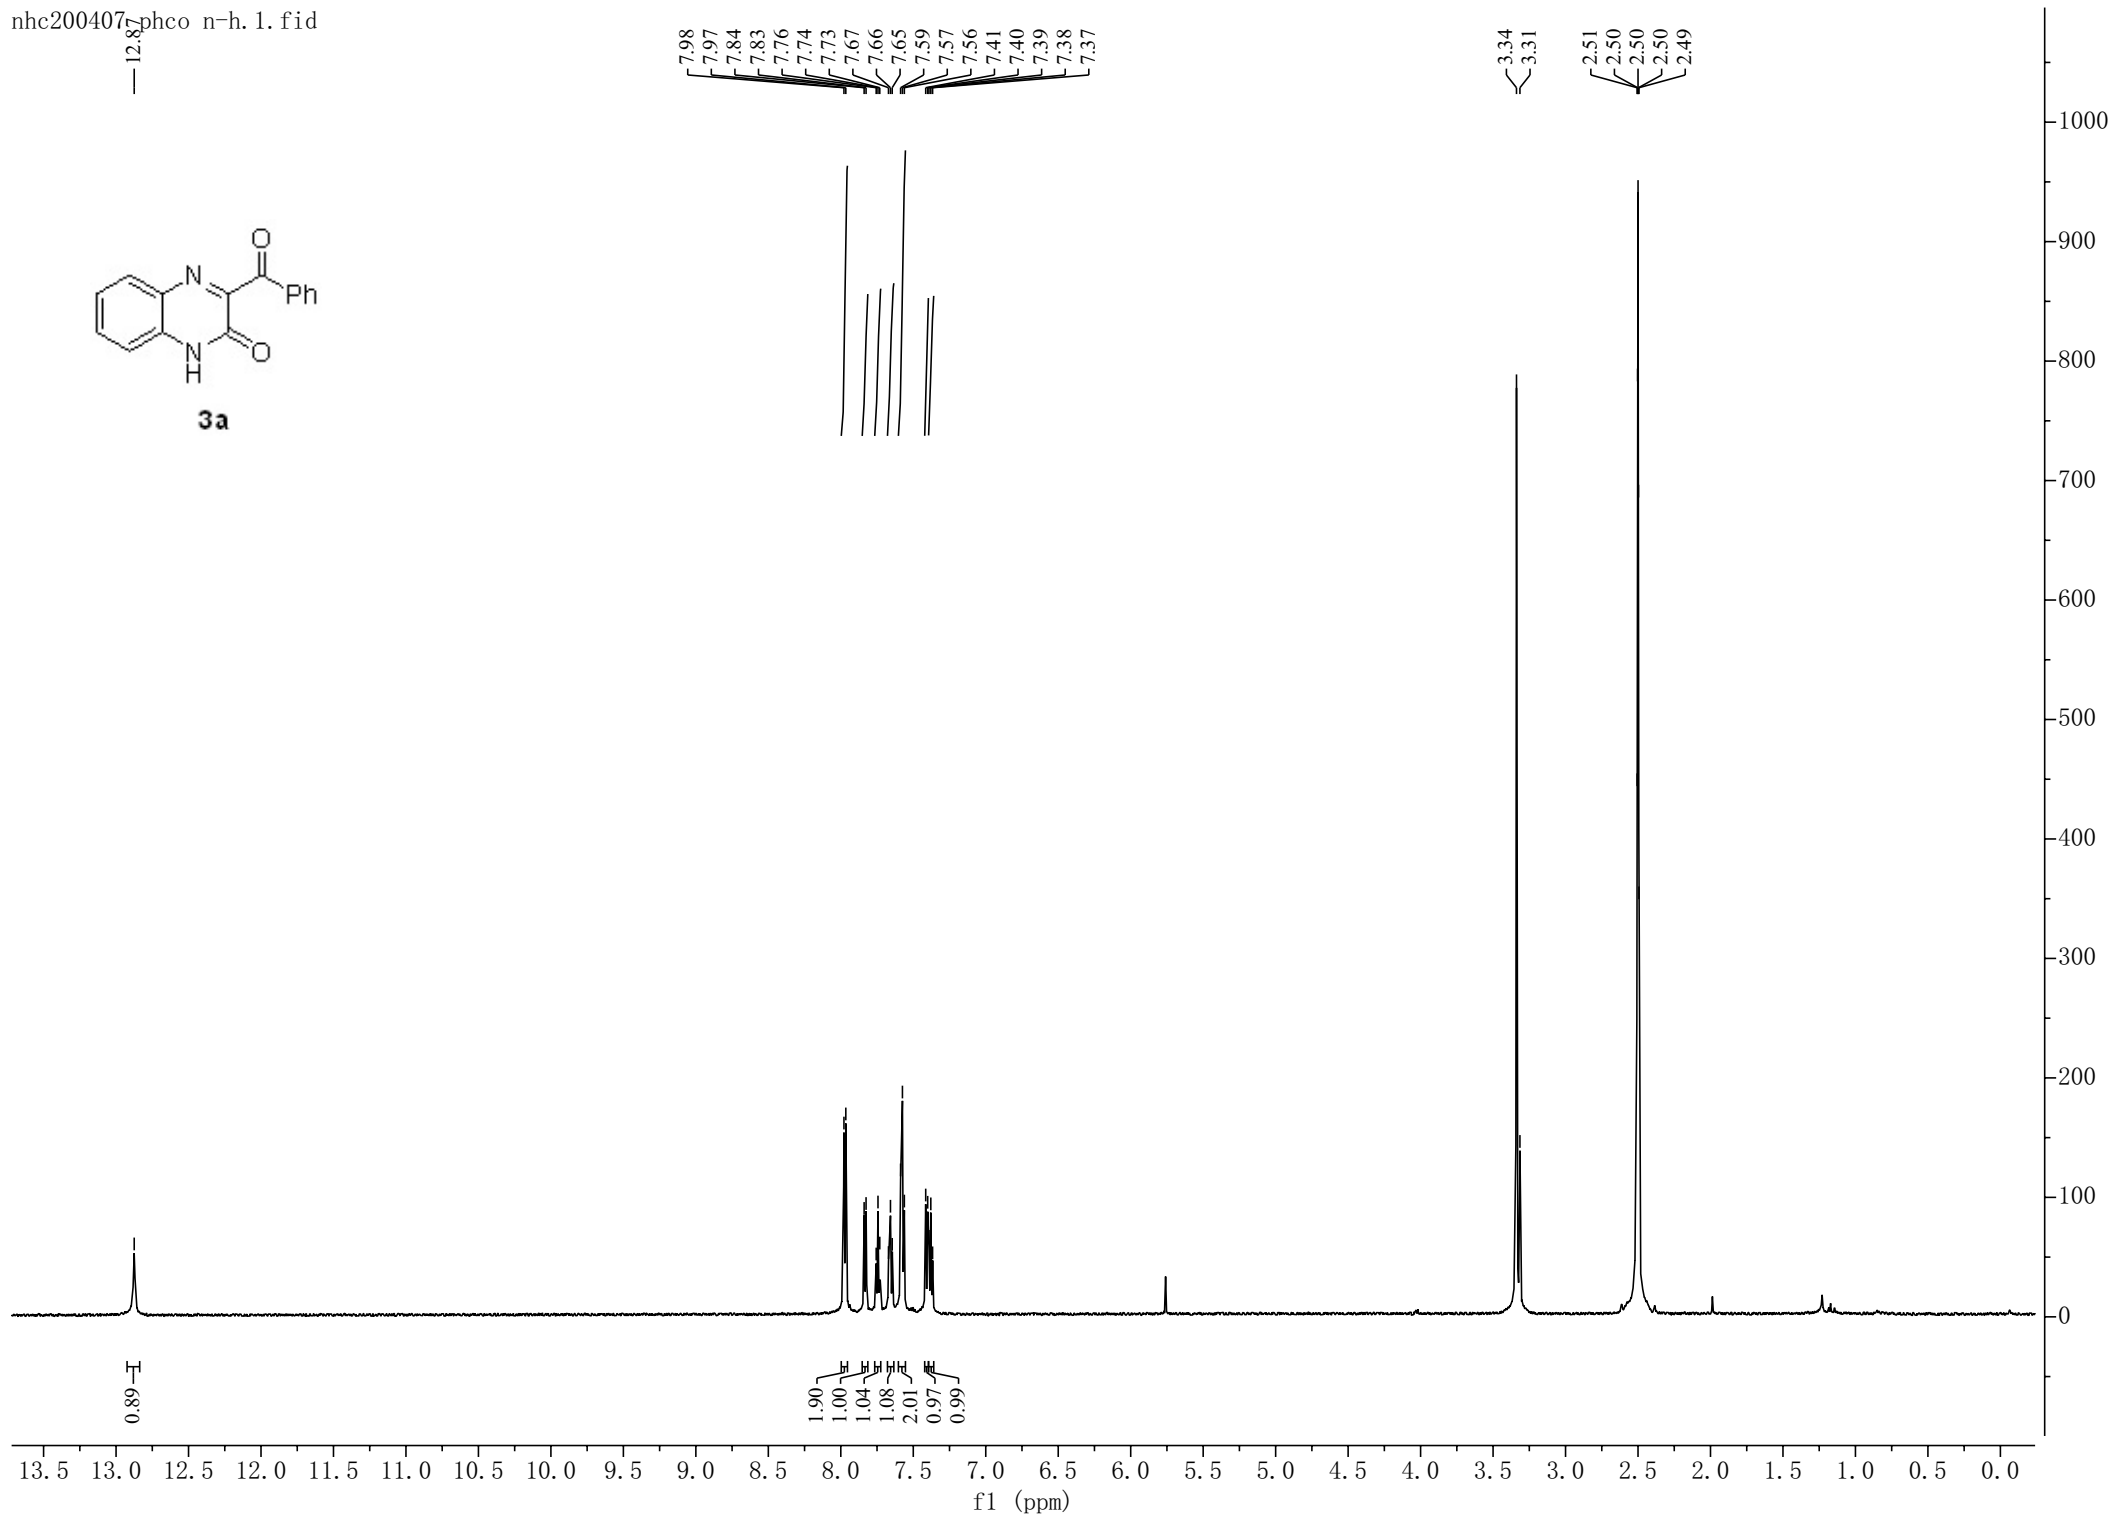

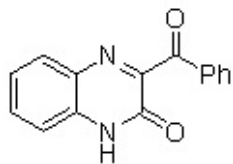

**3a**

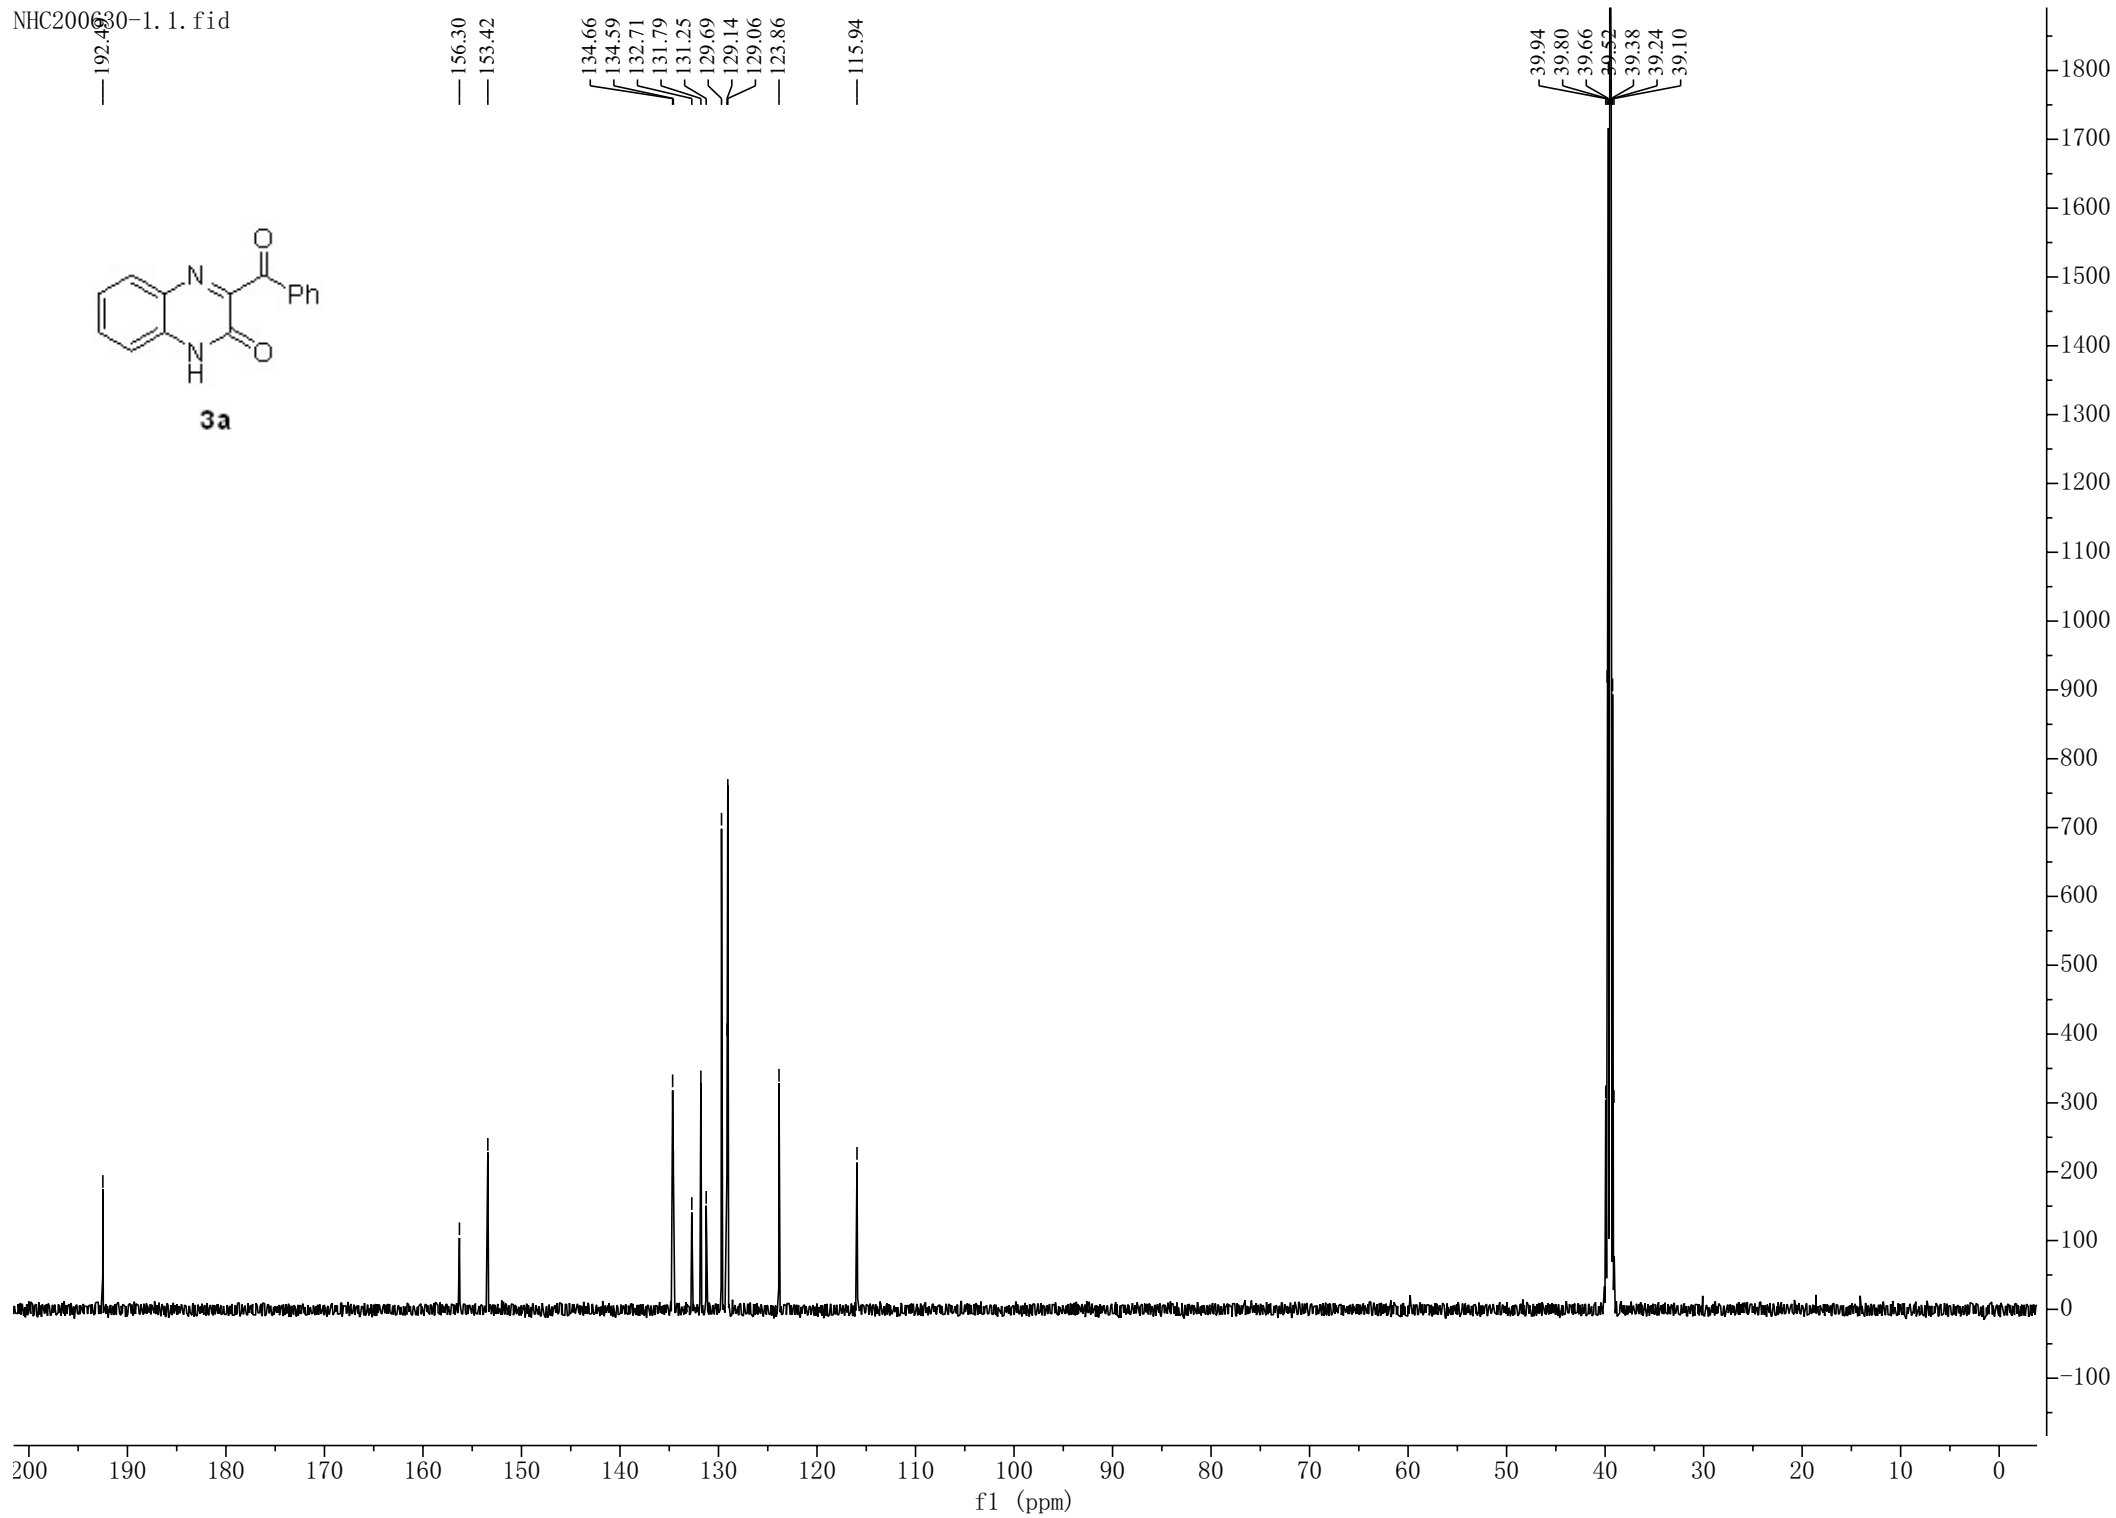

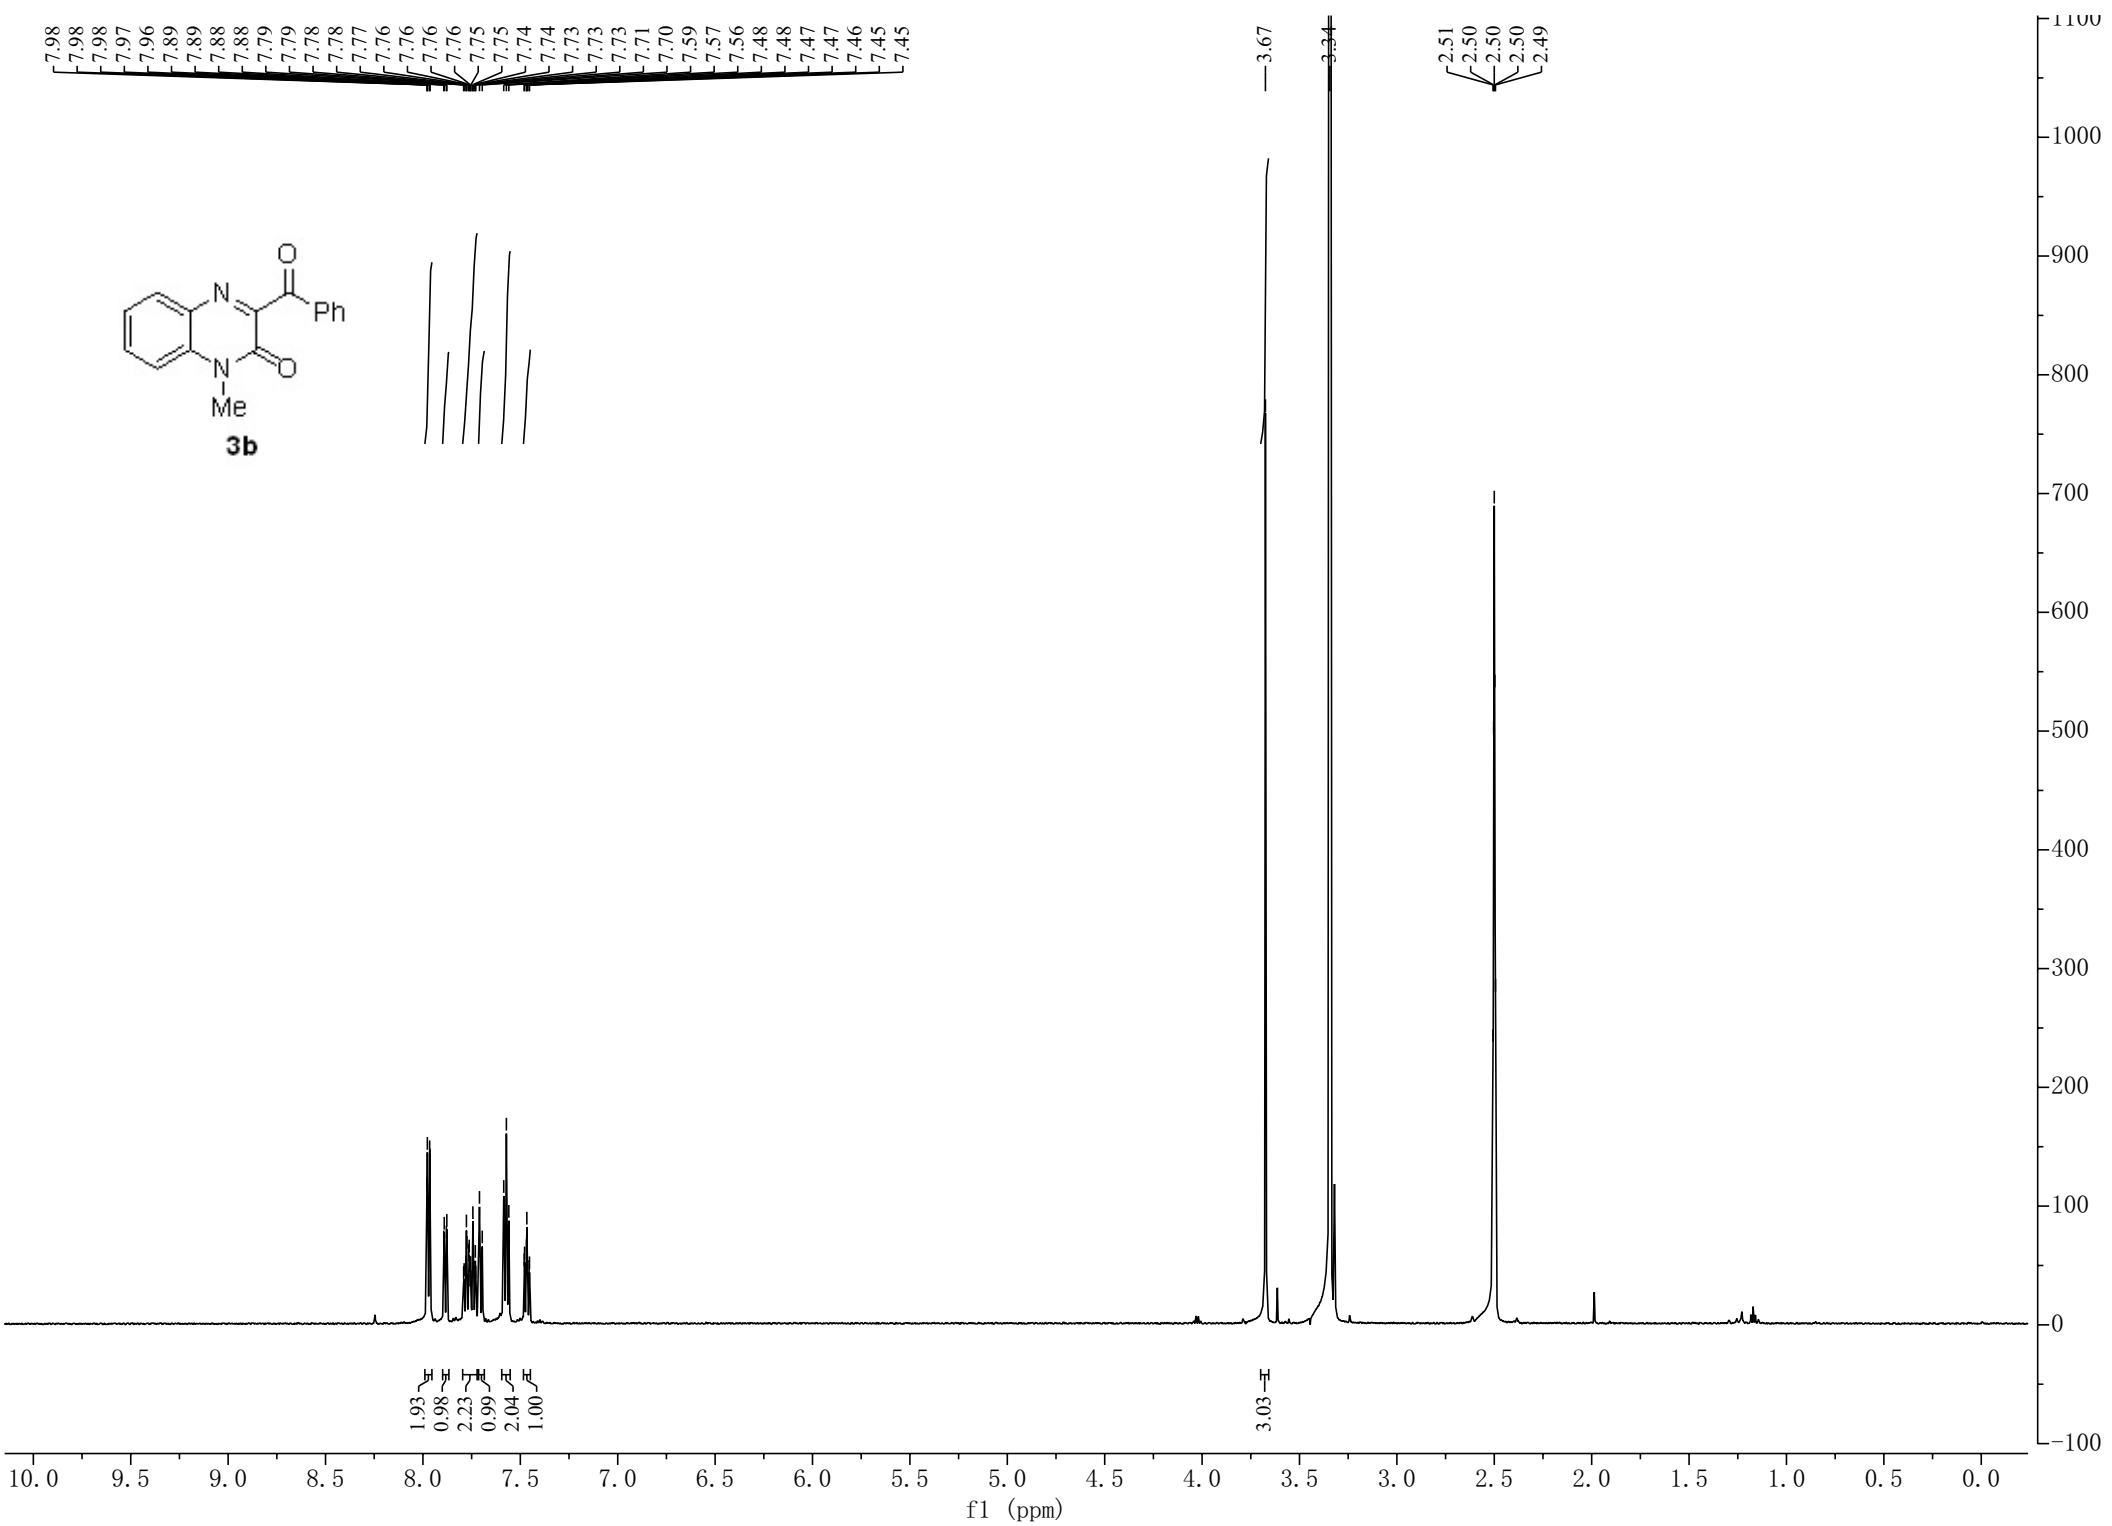

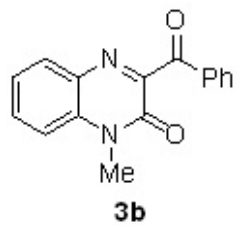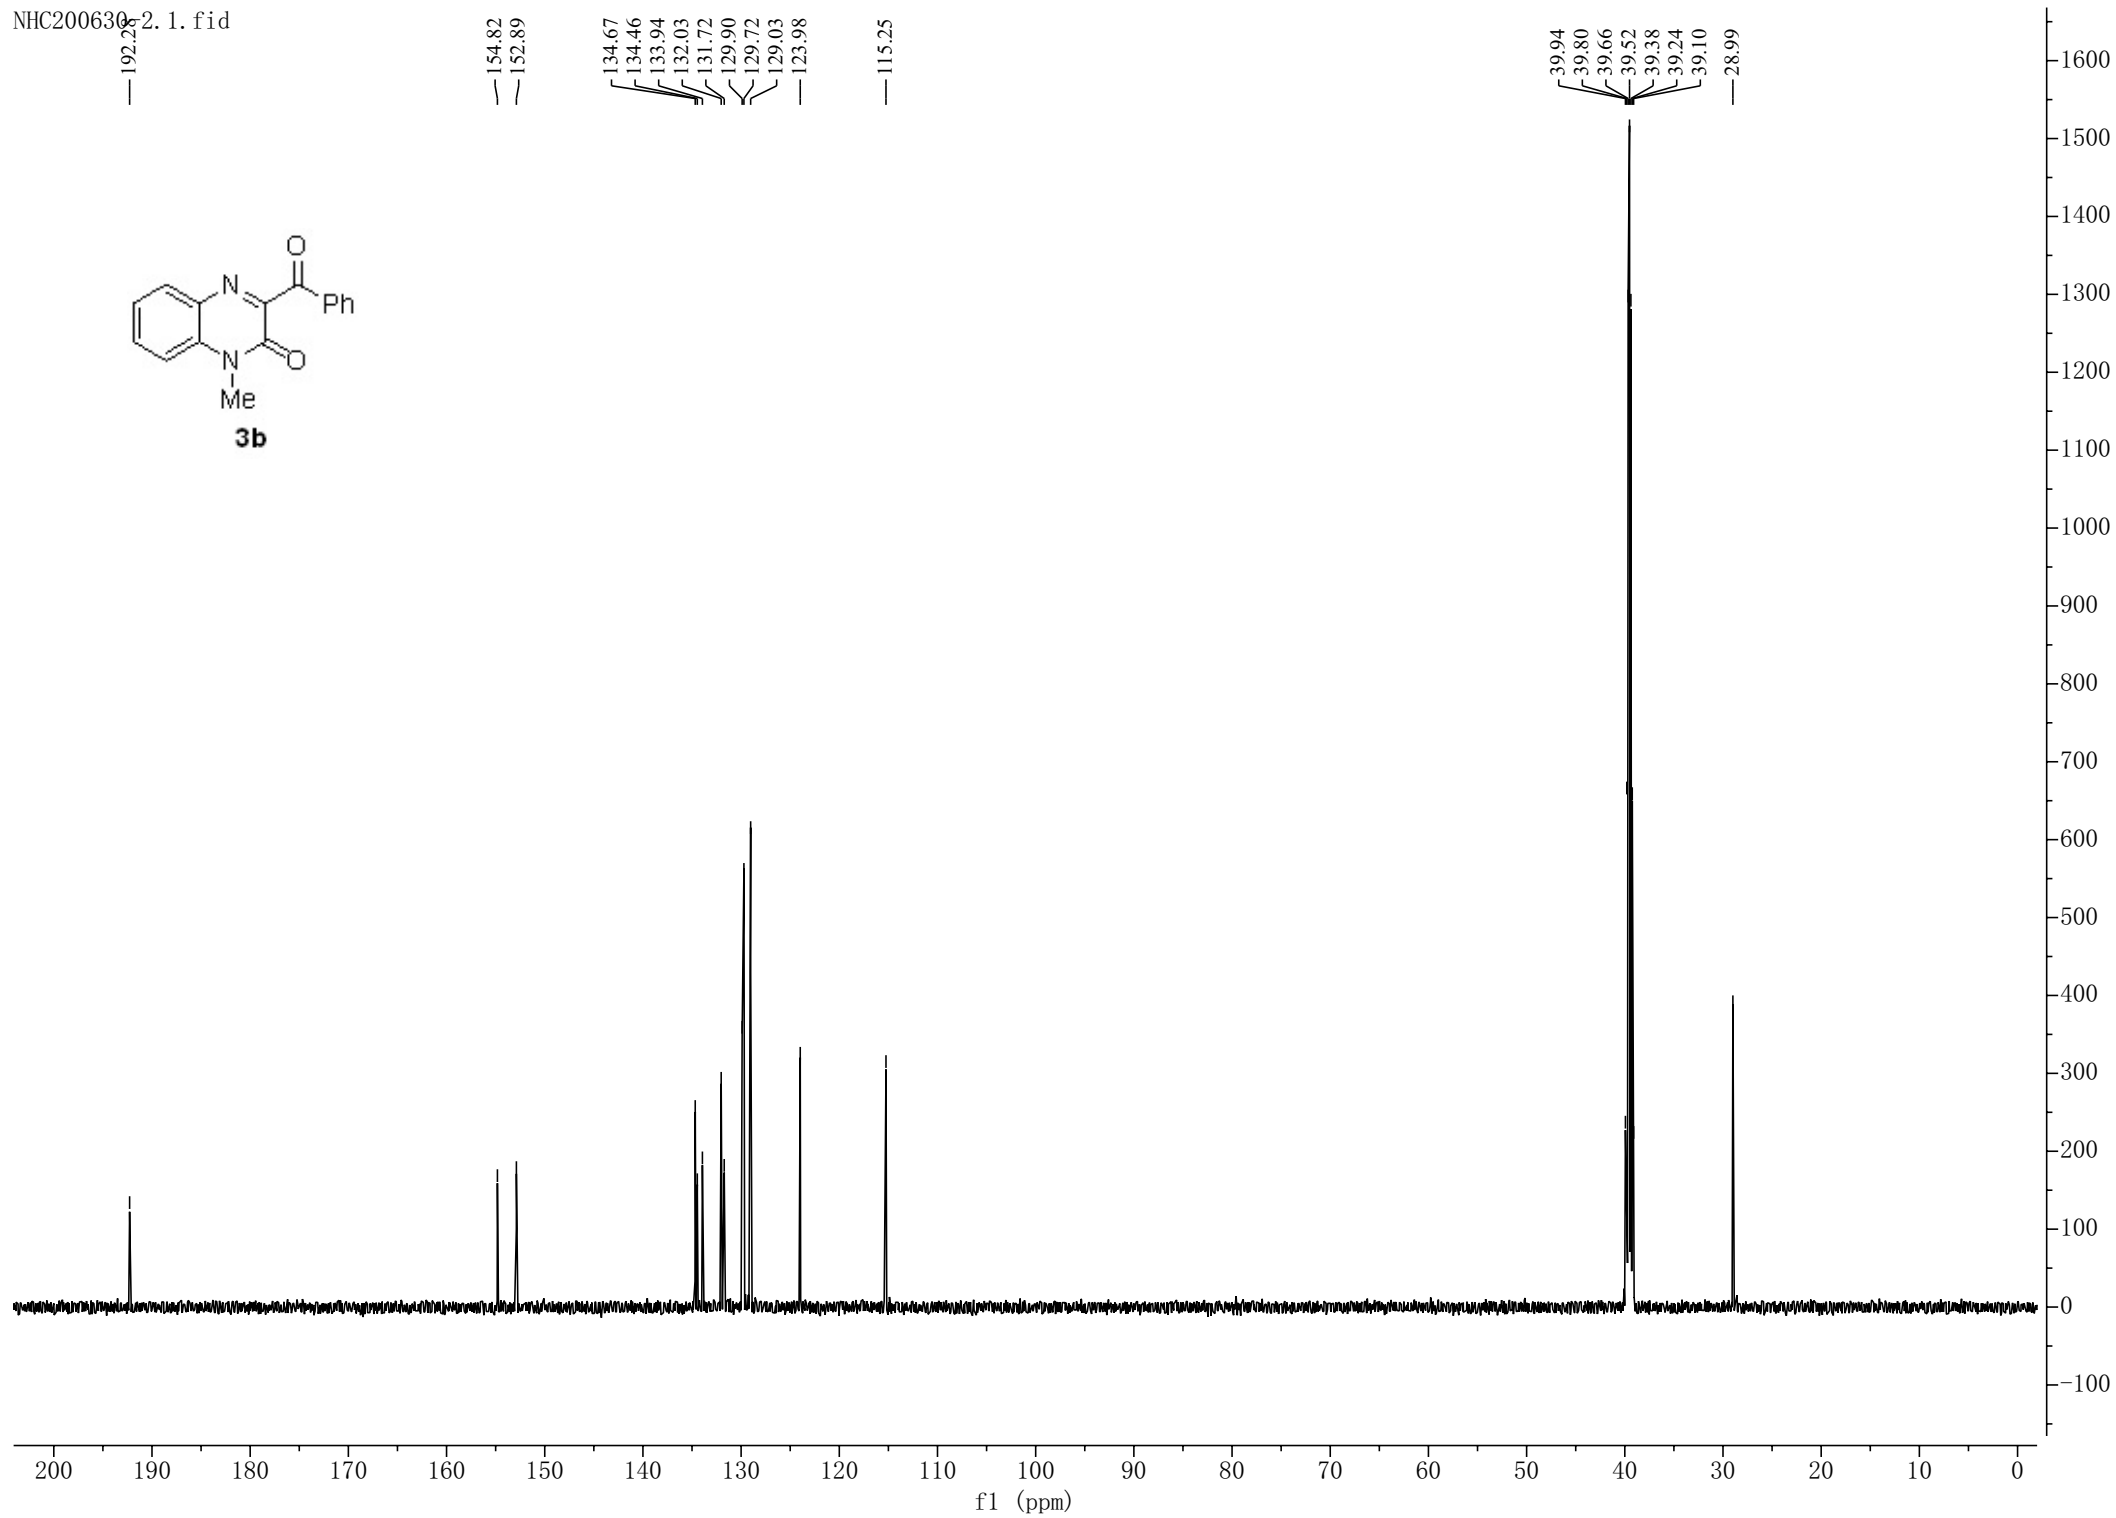

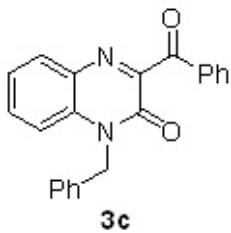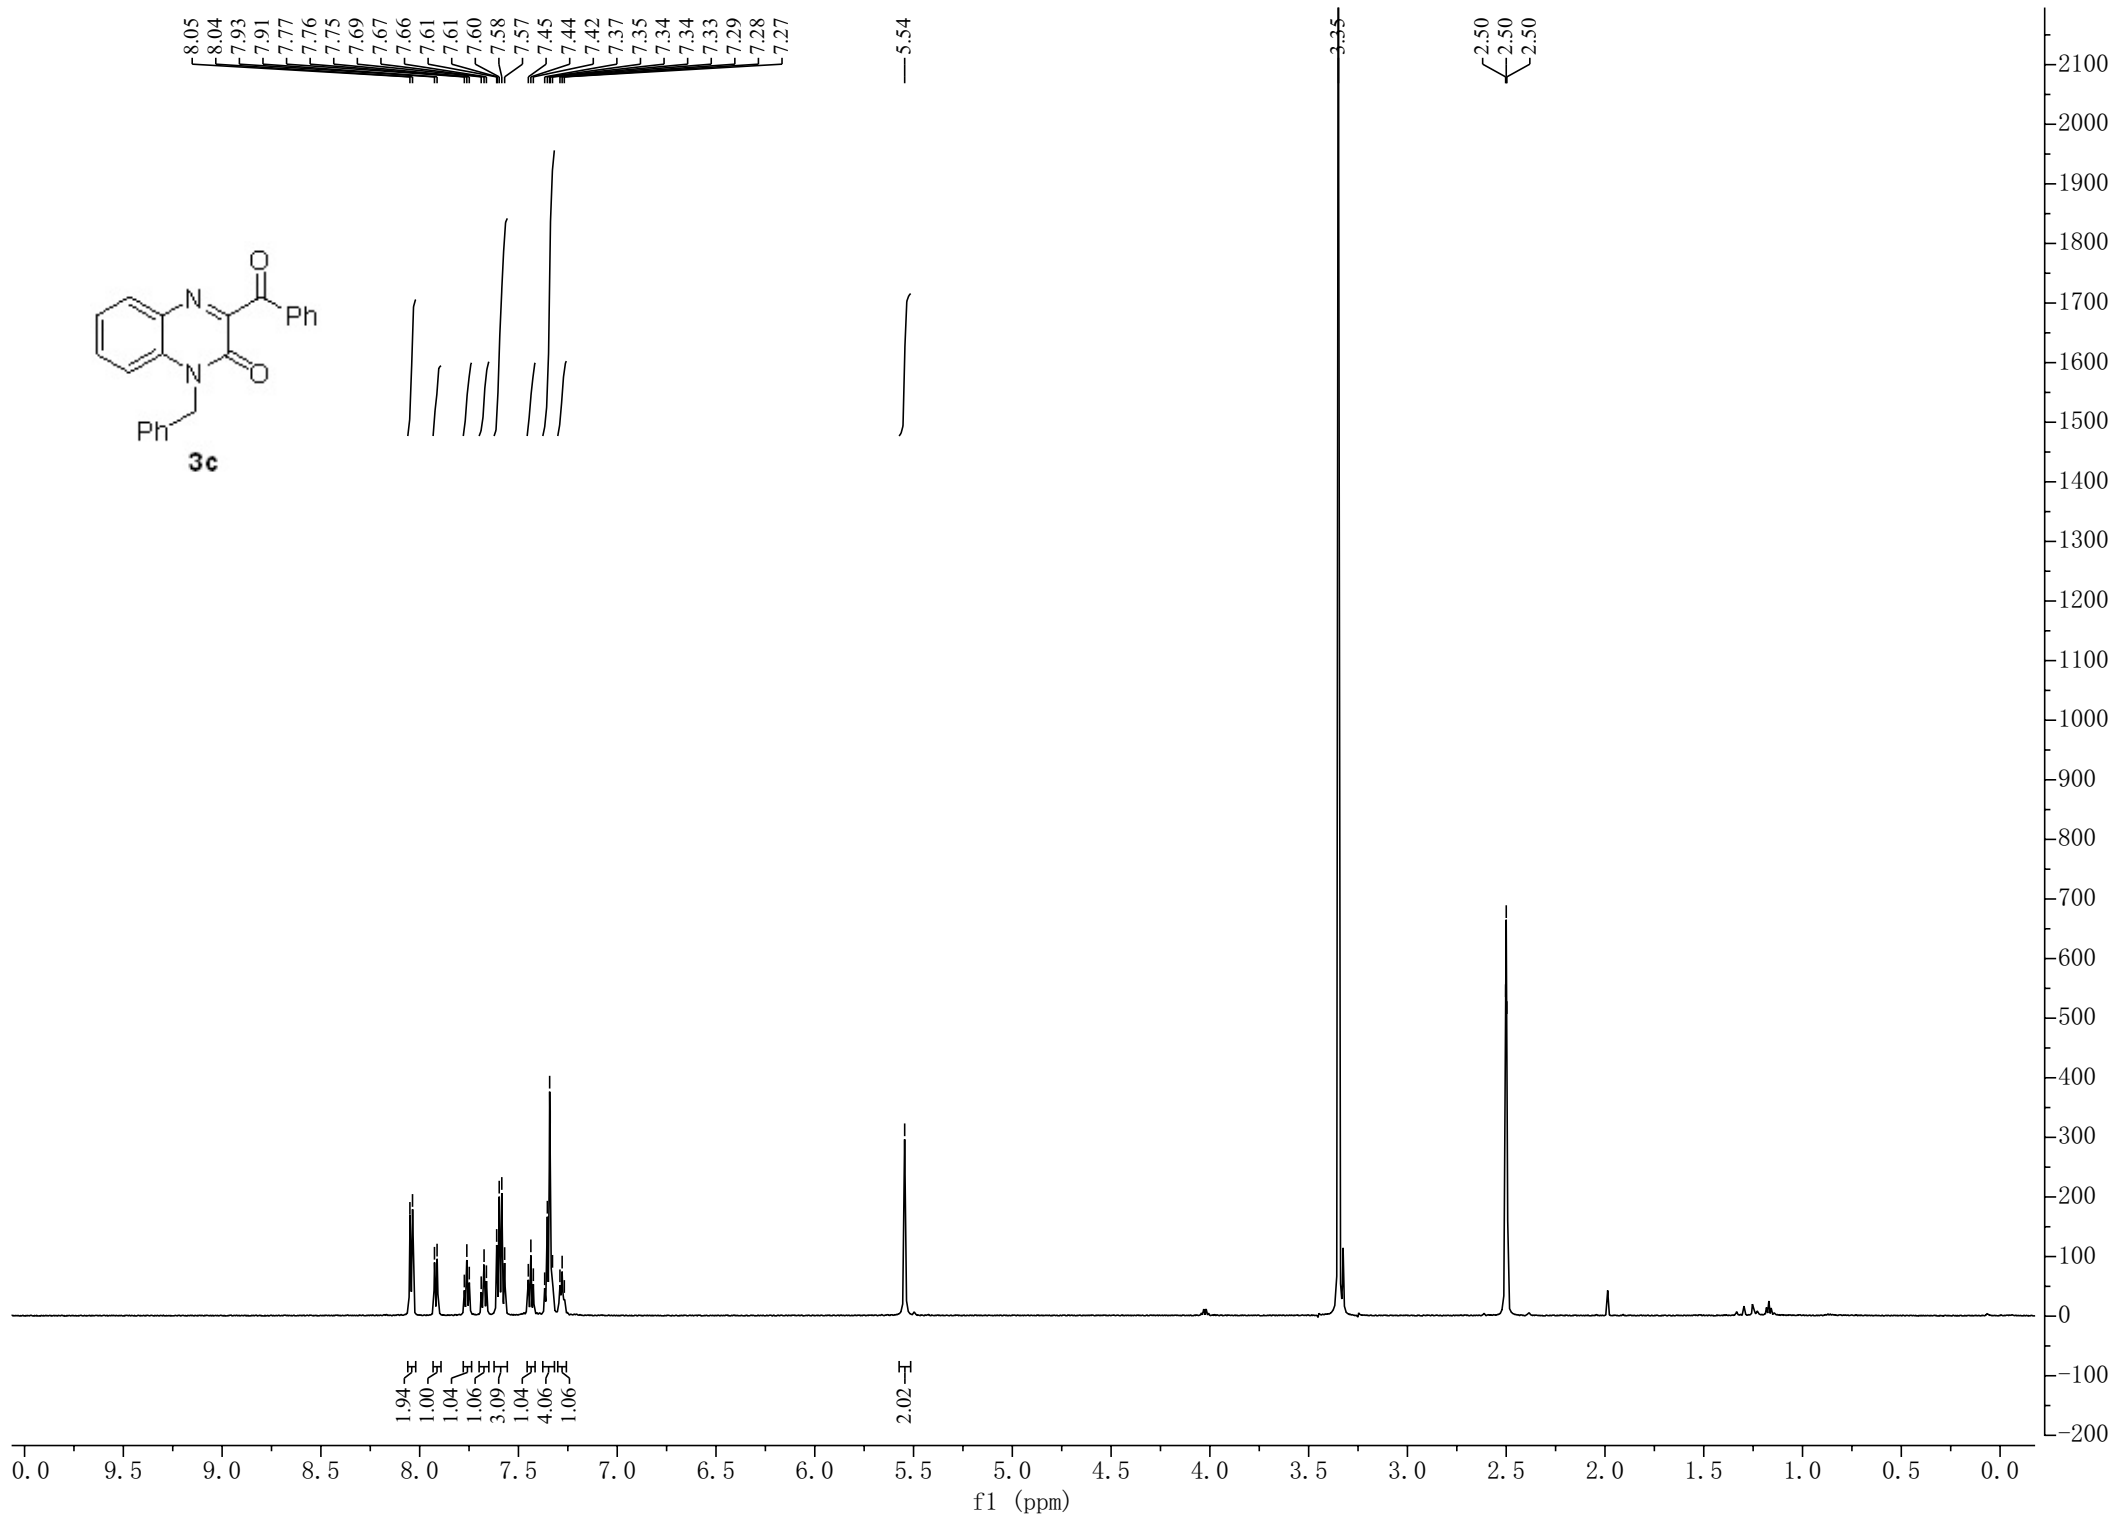

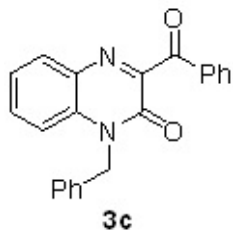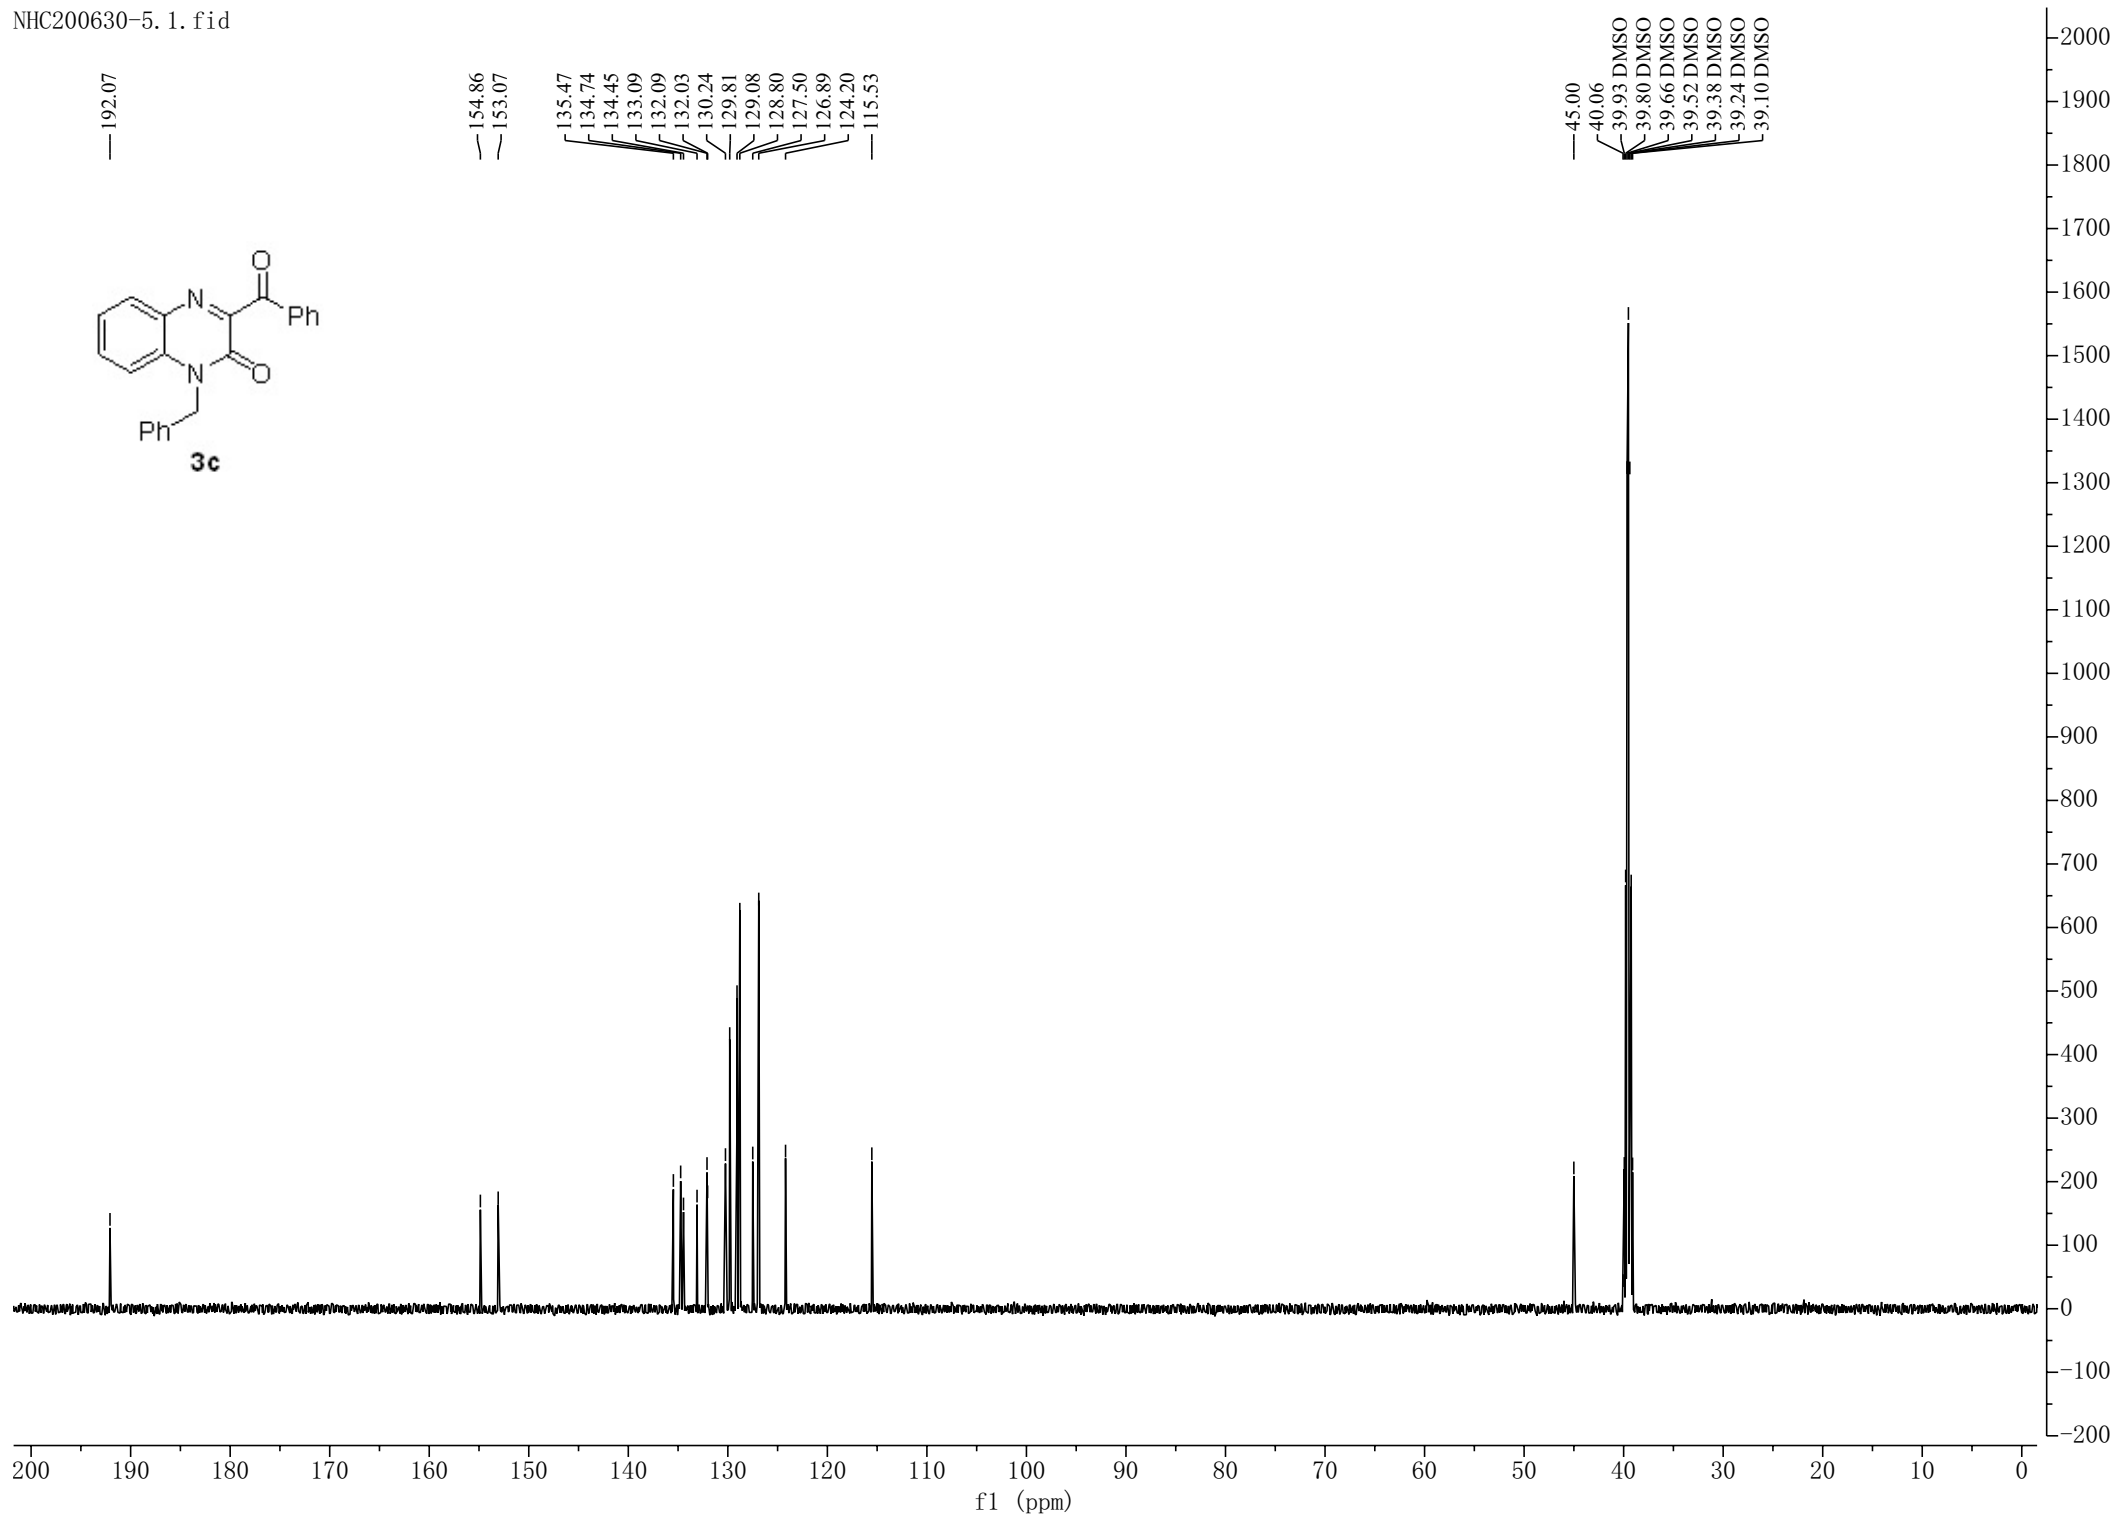

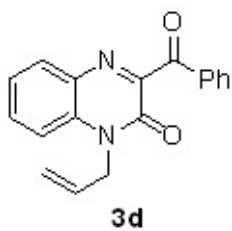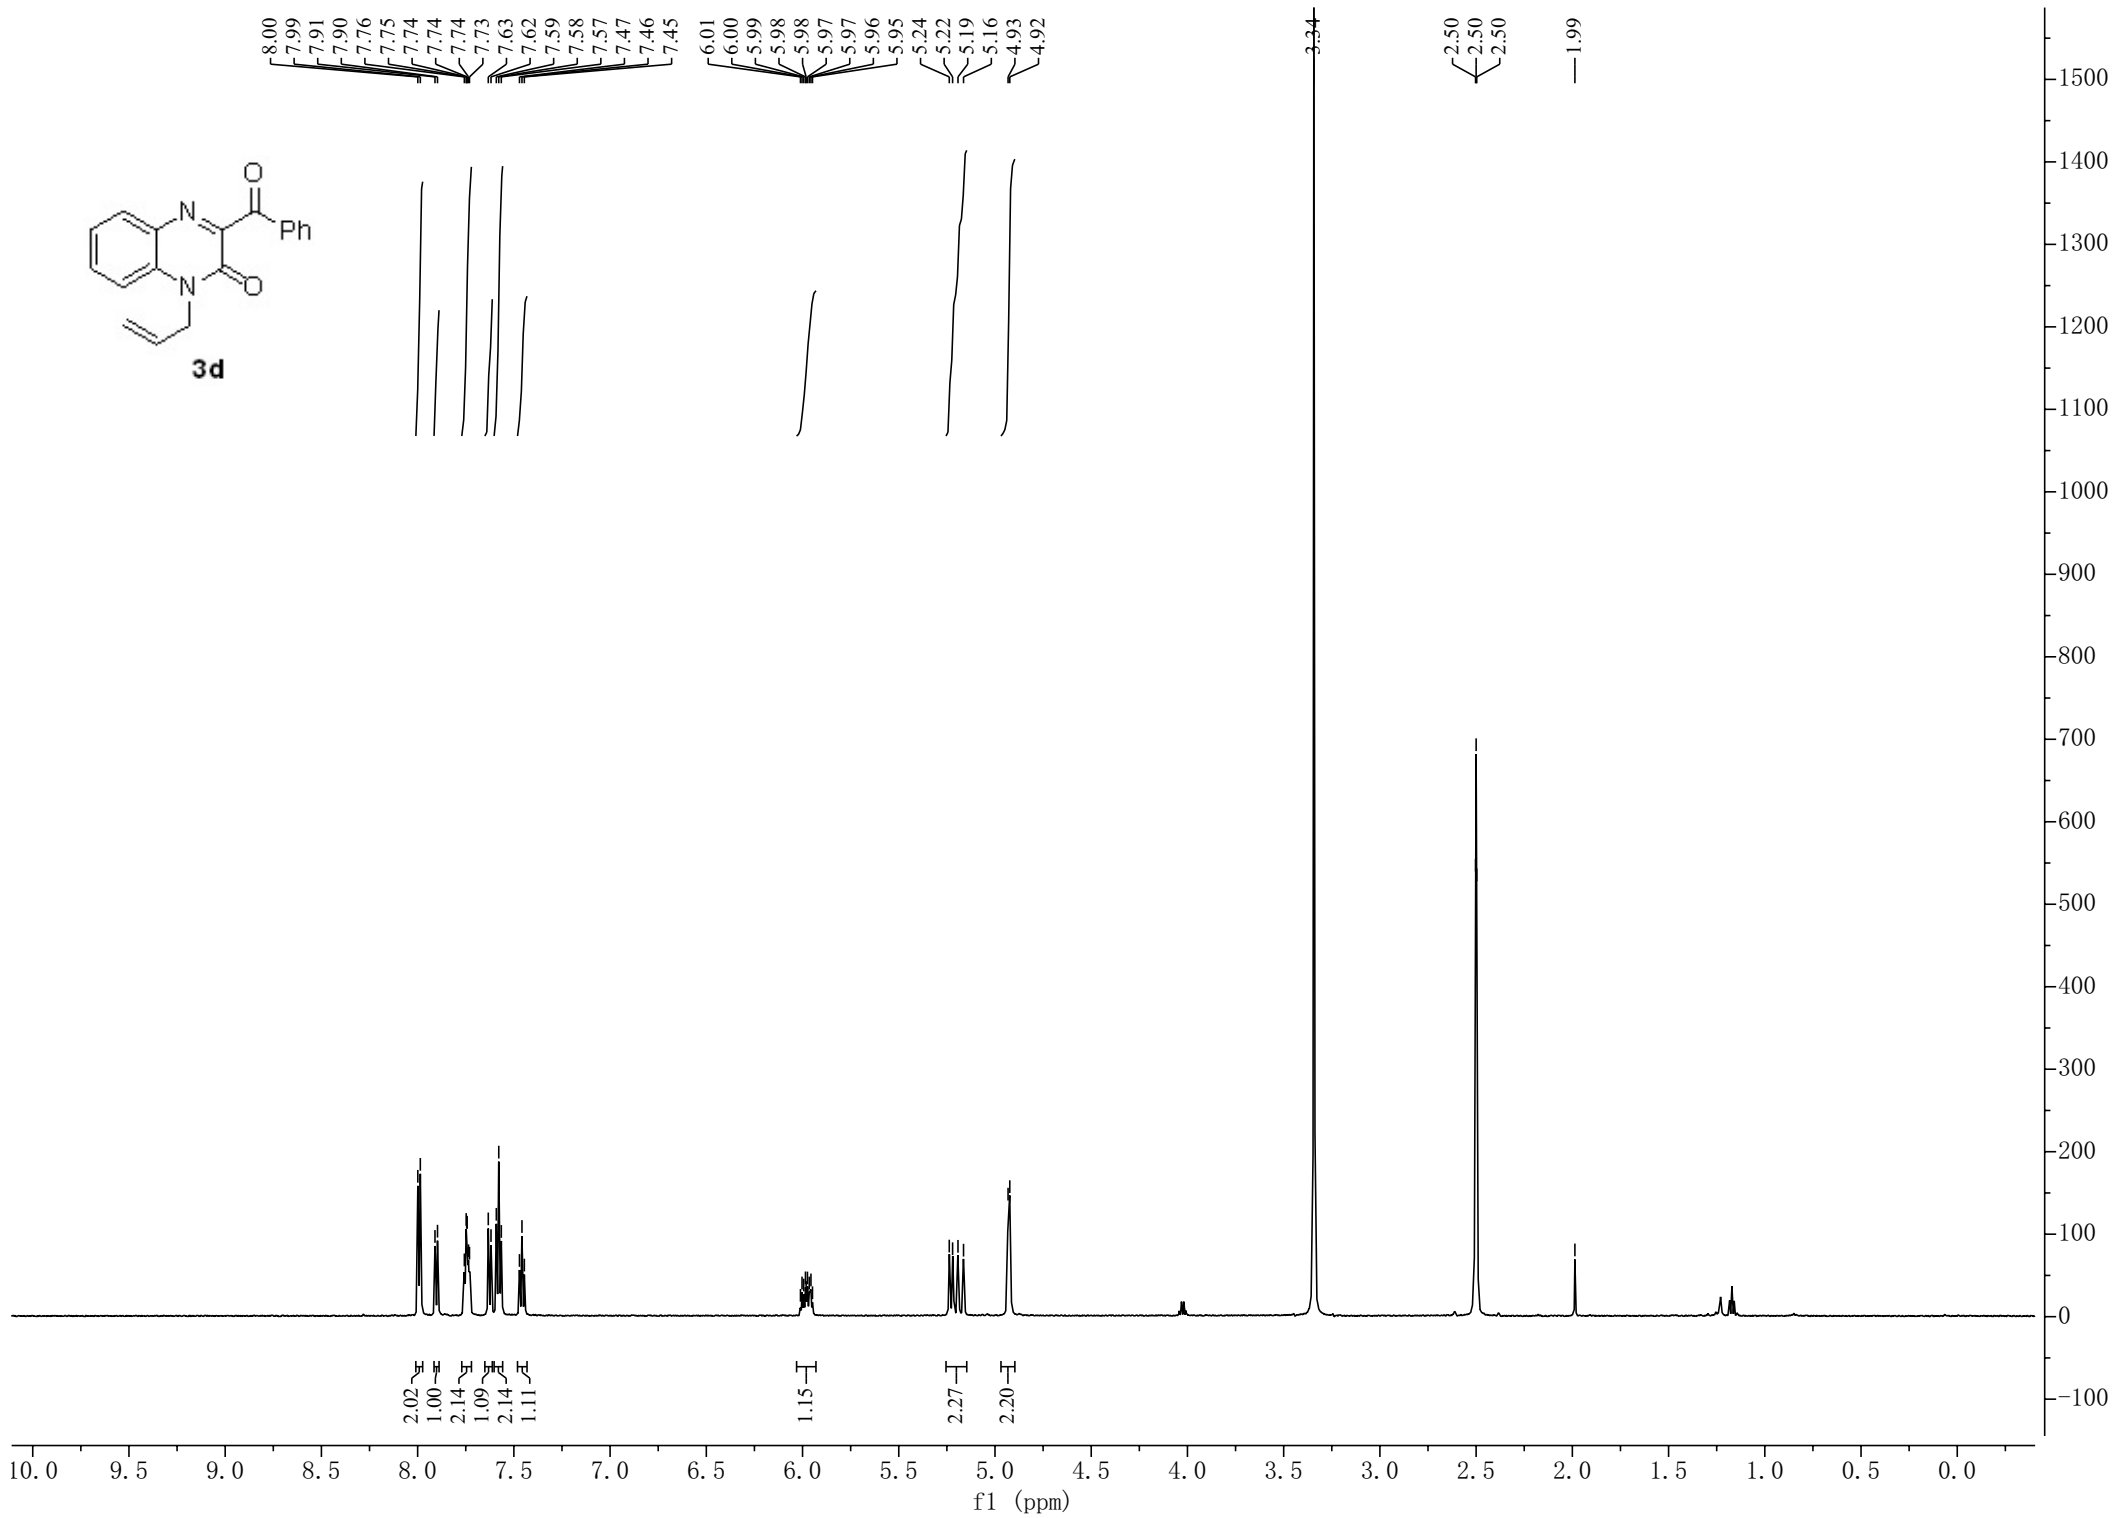

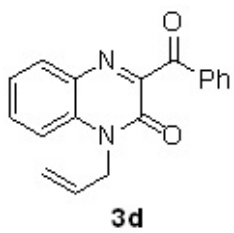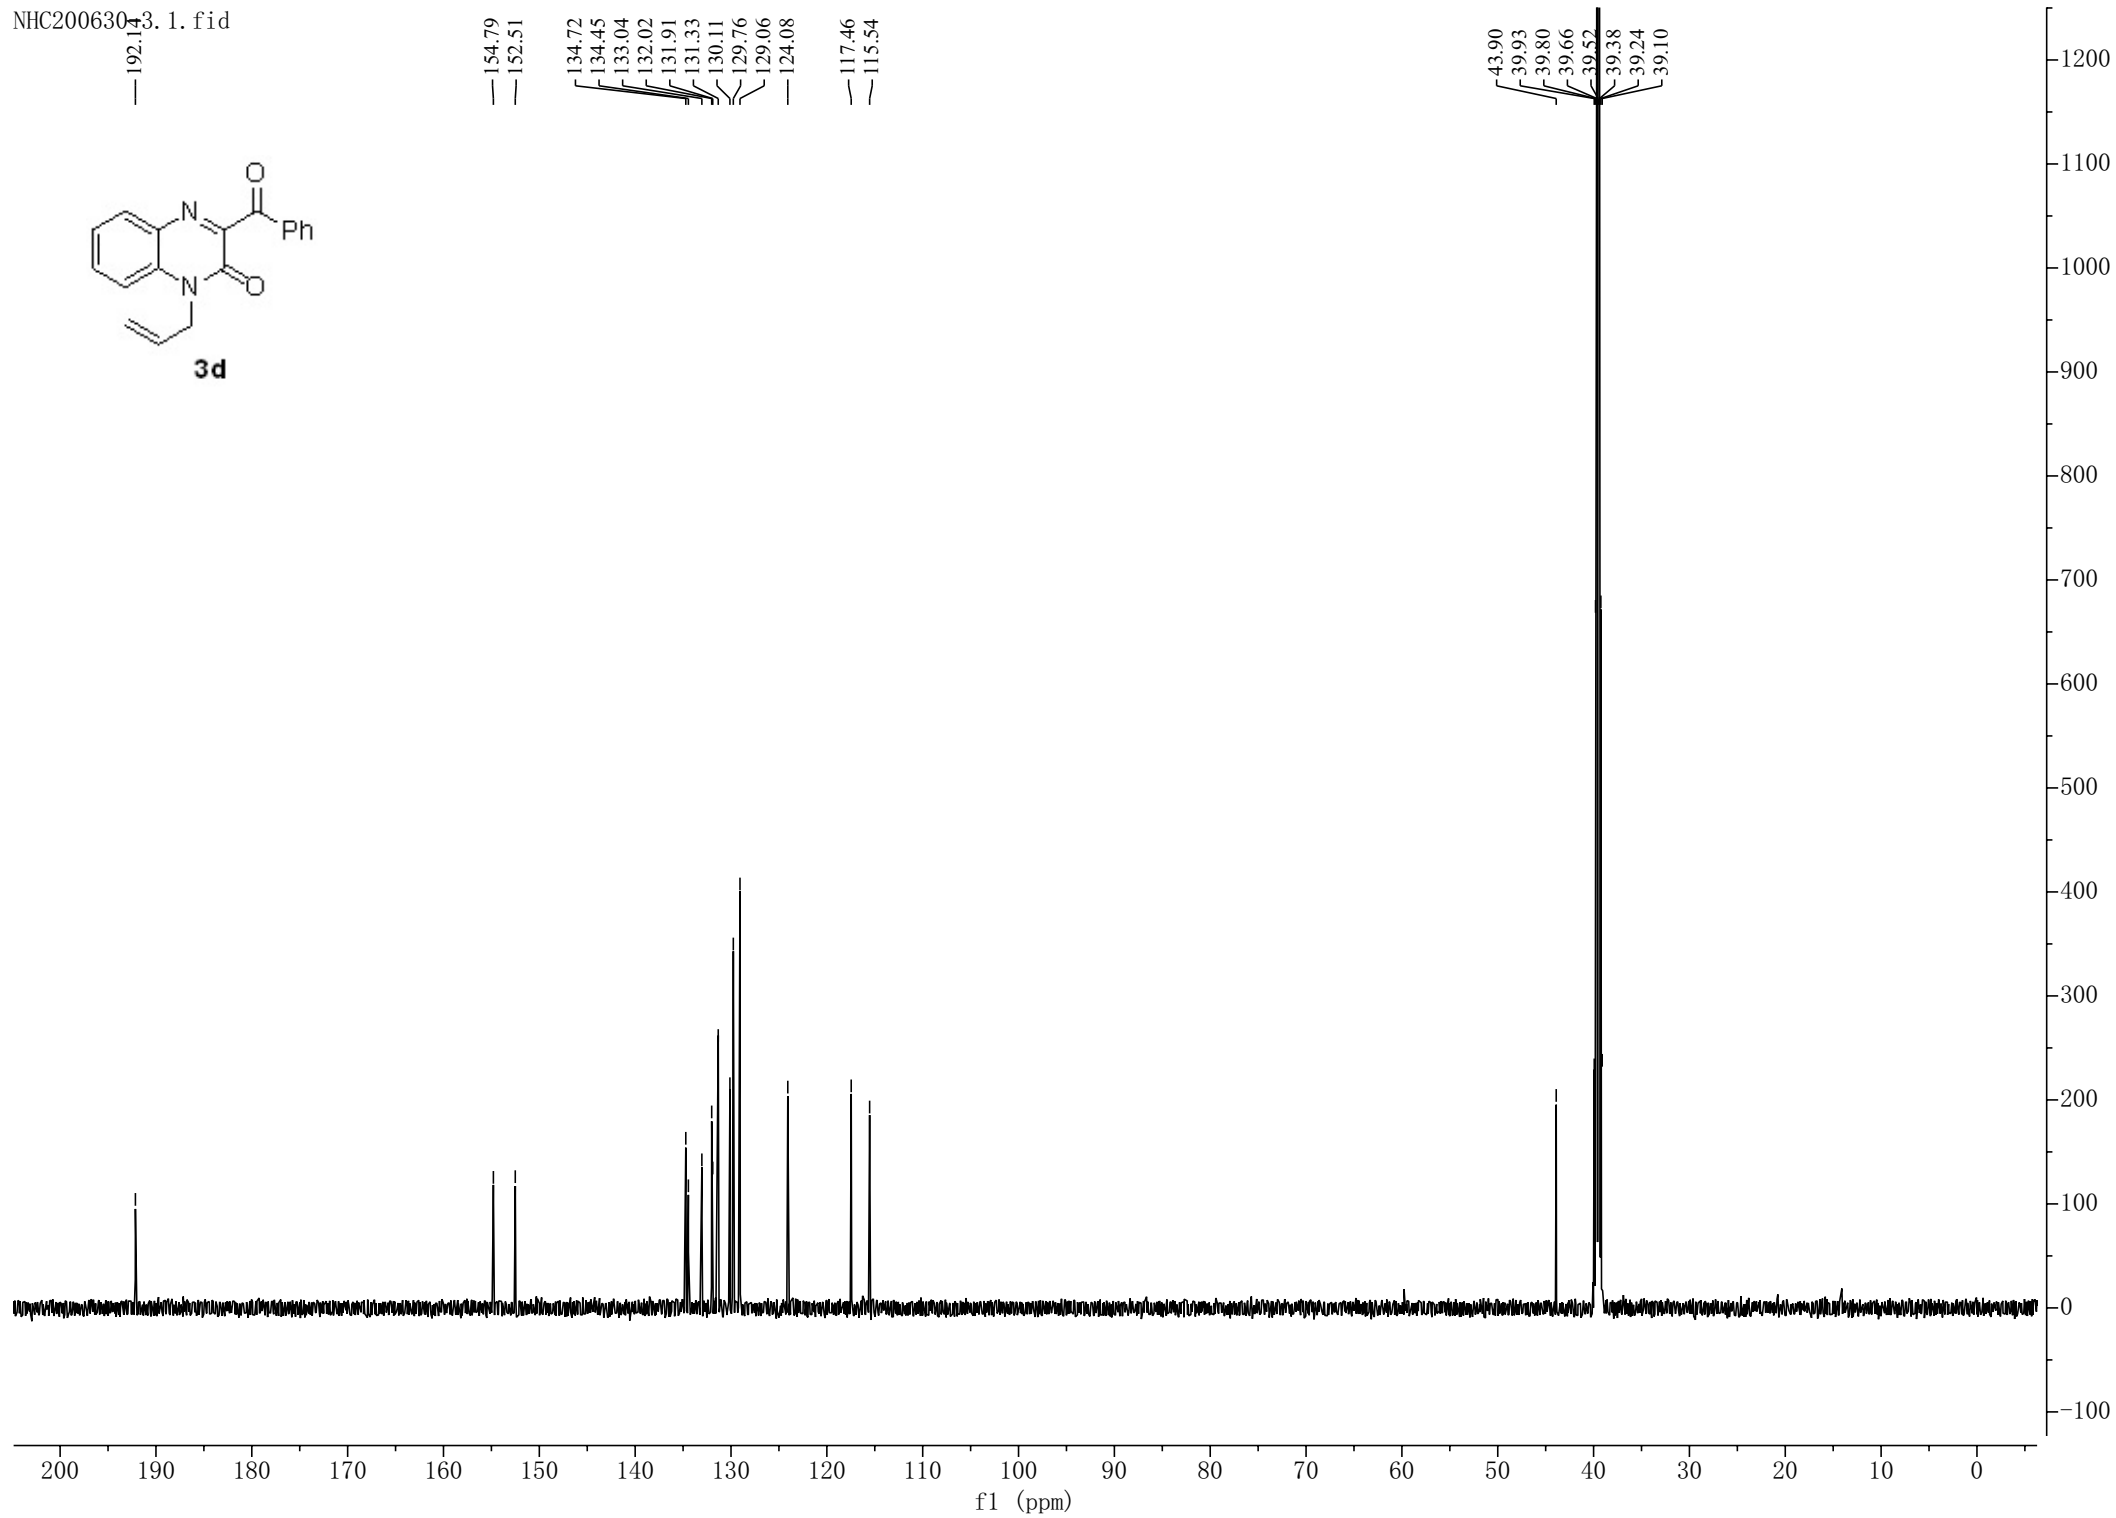



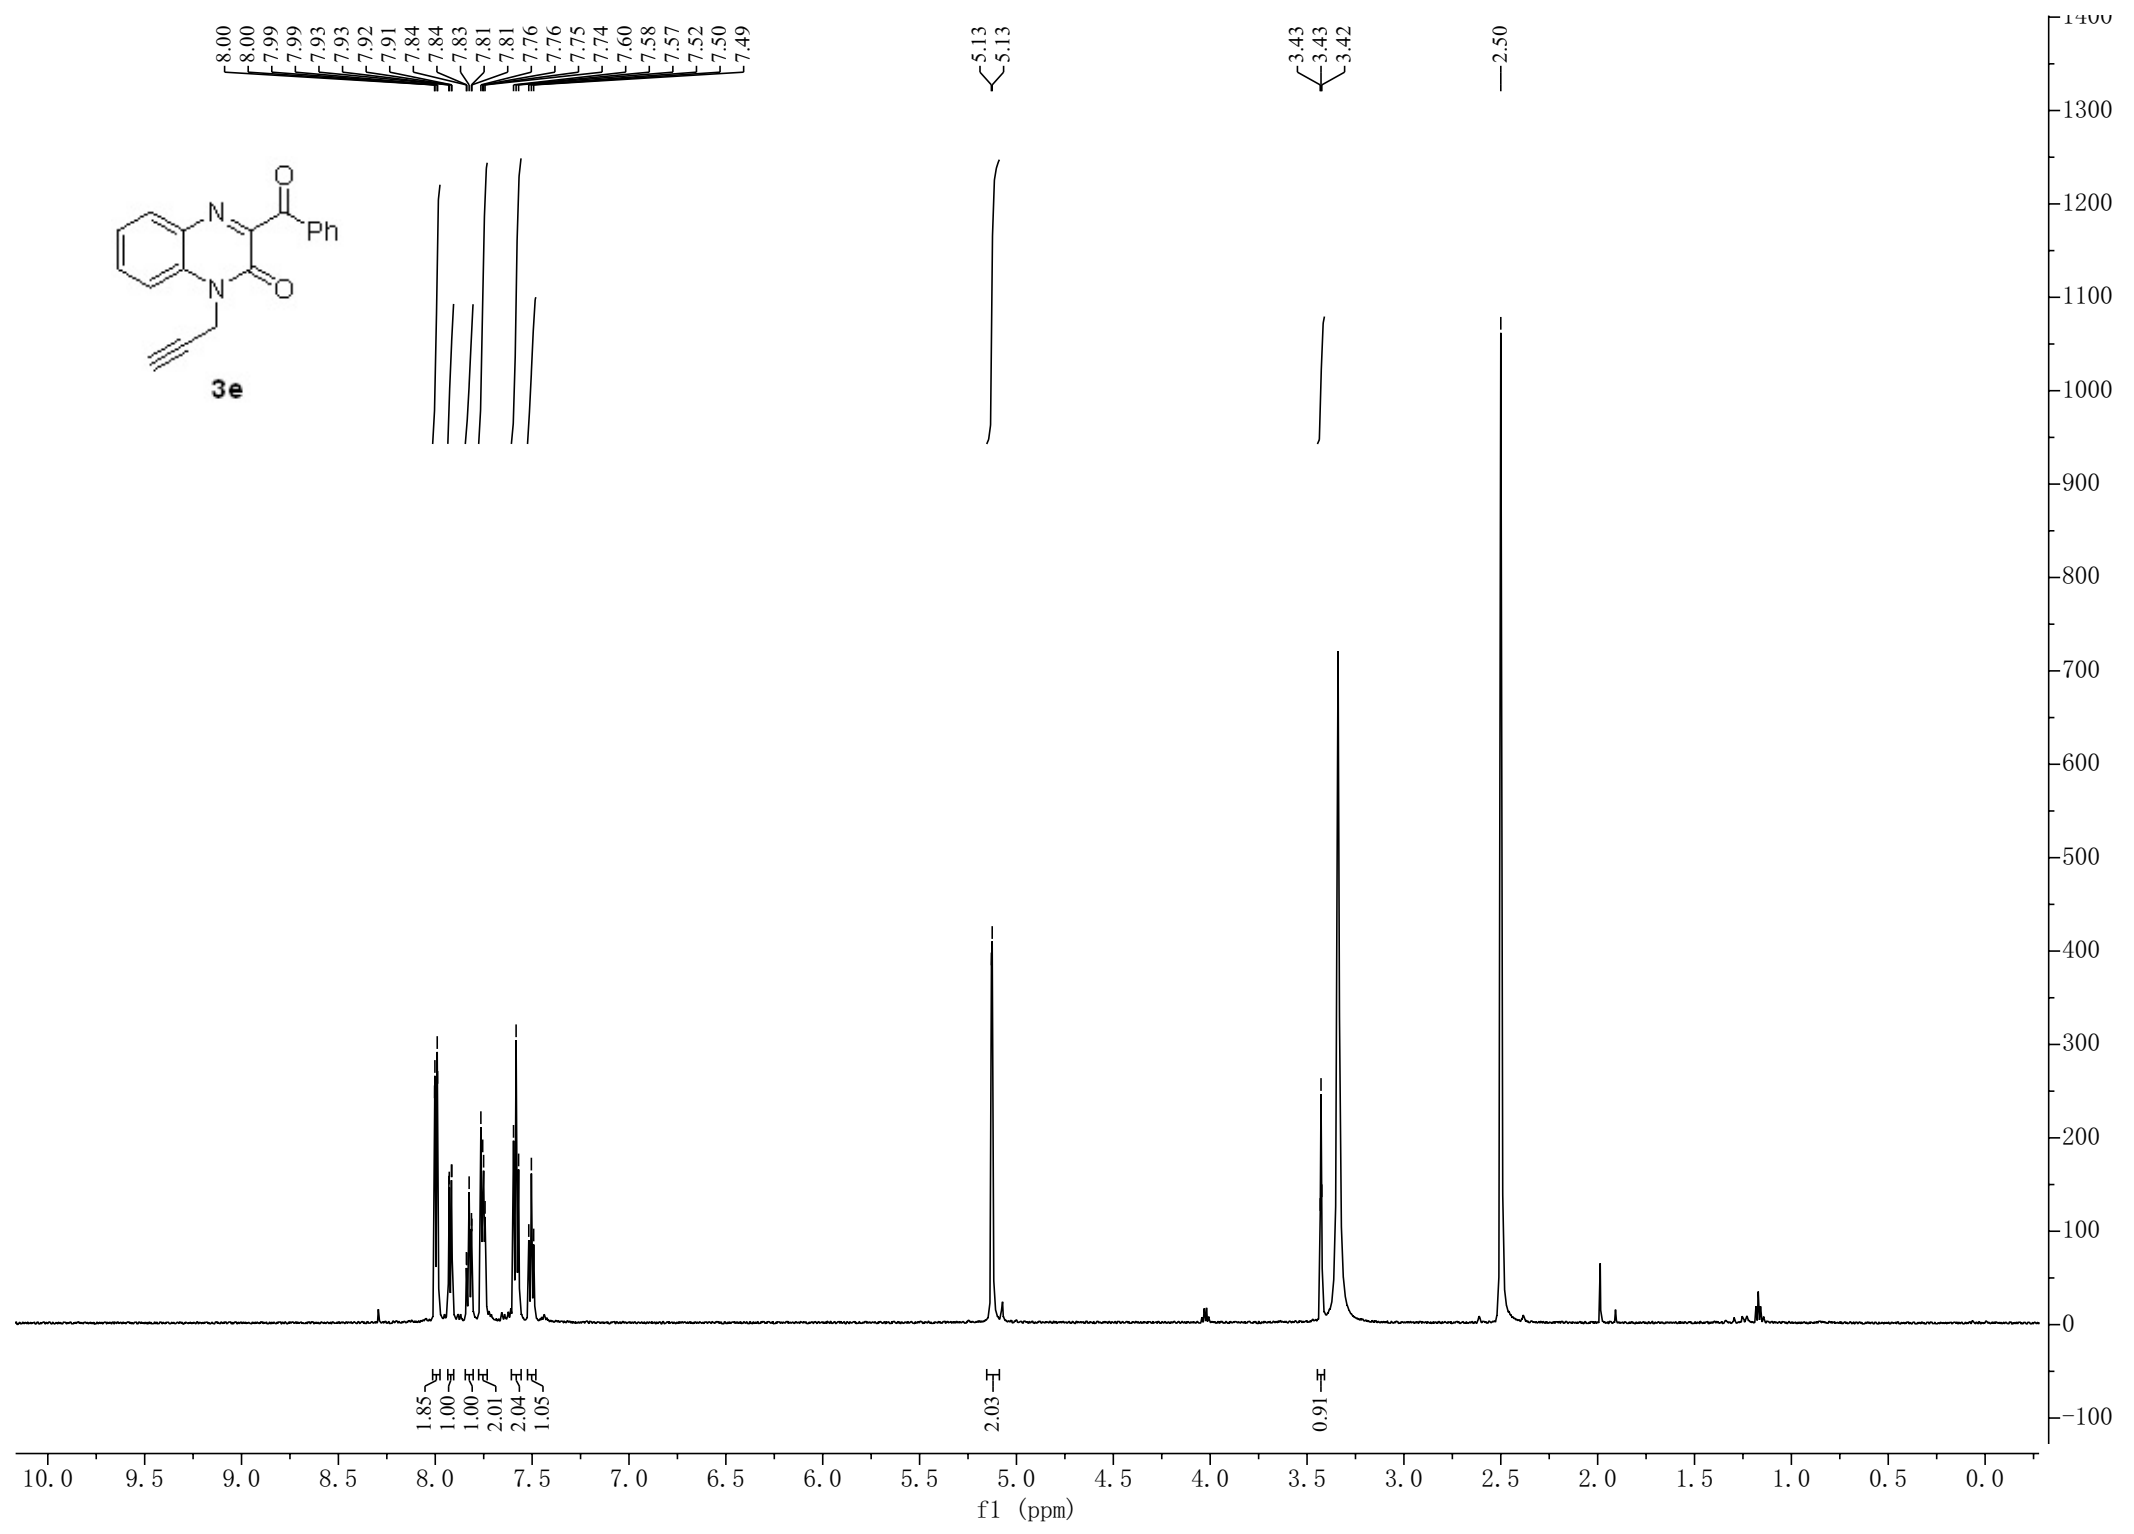

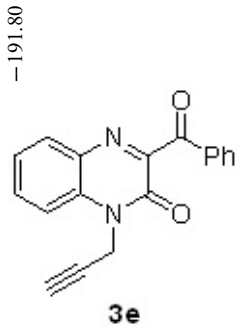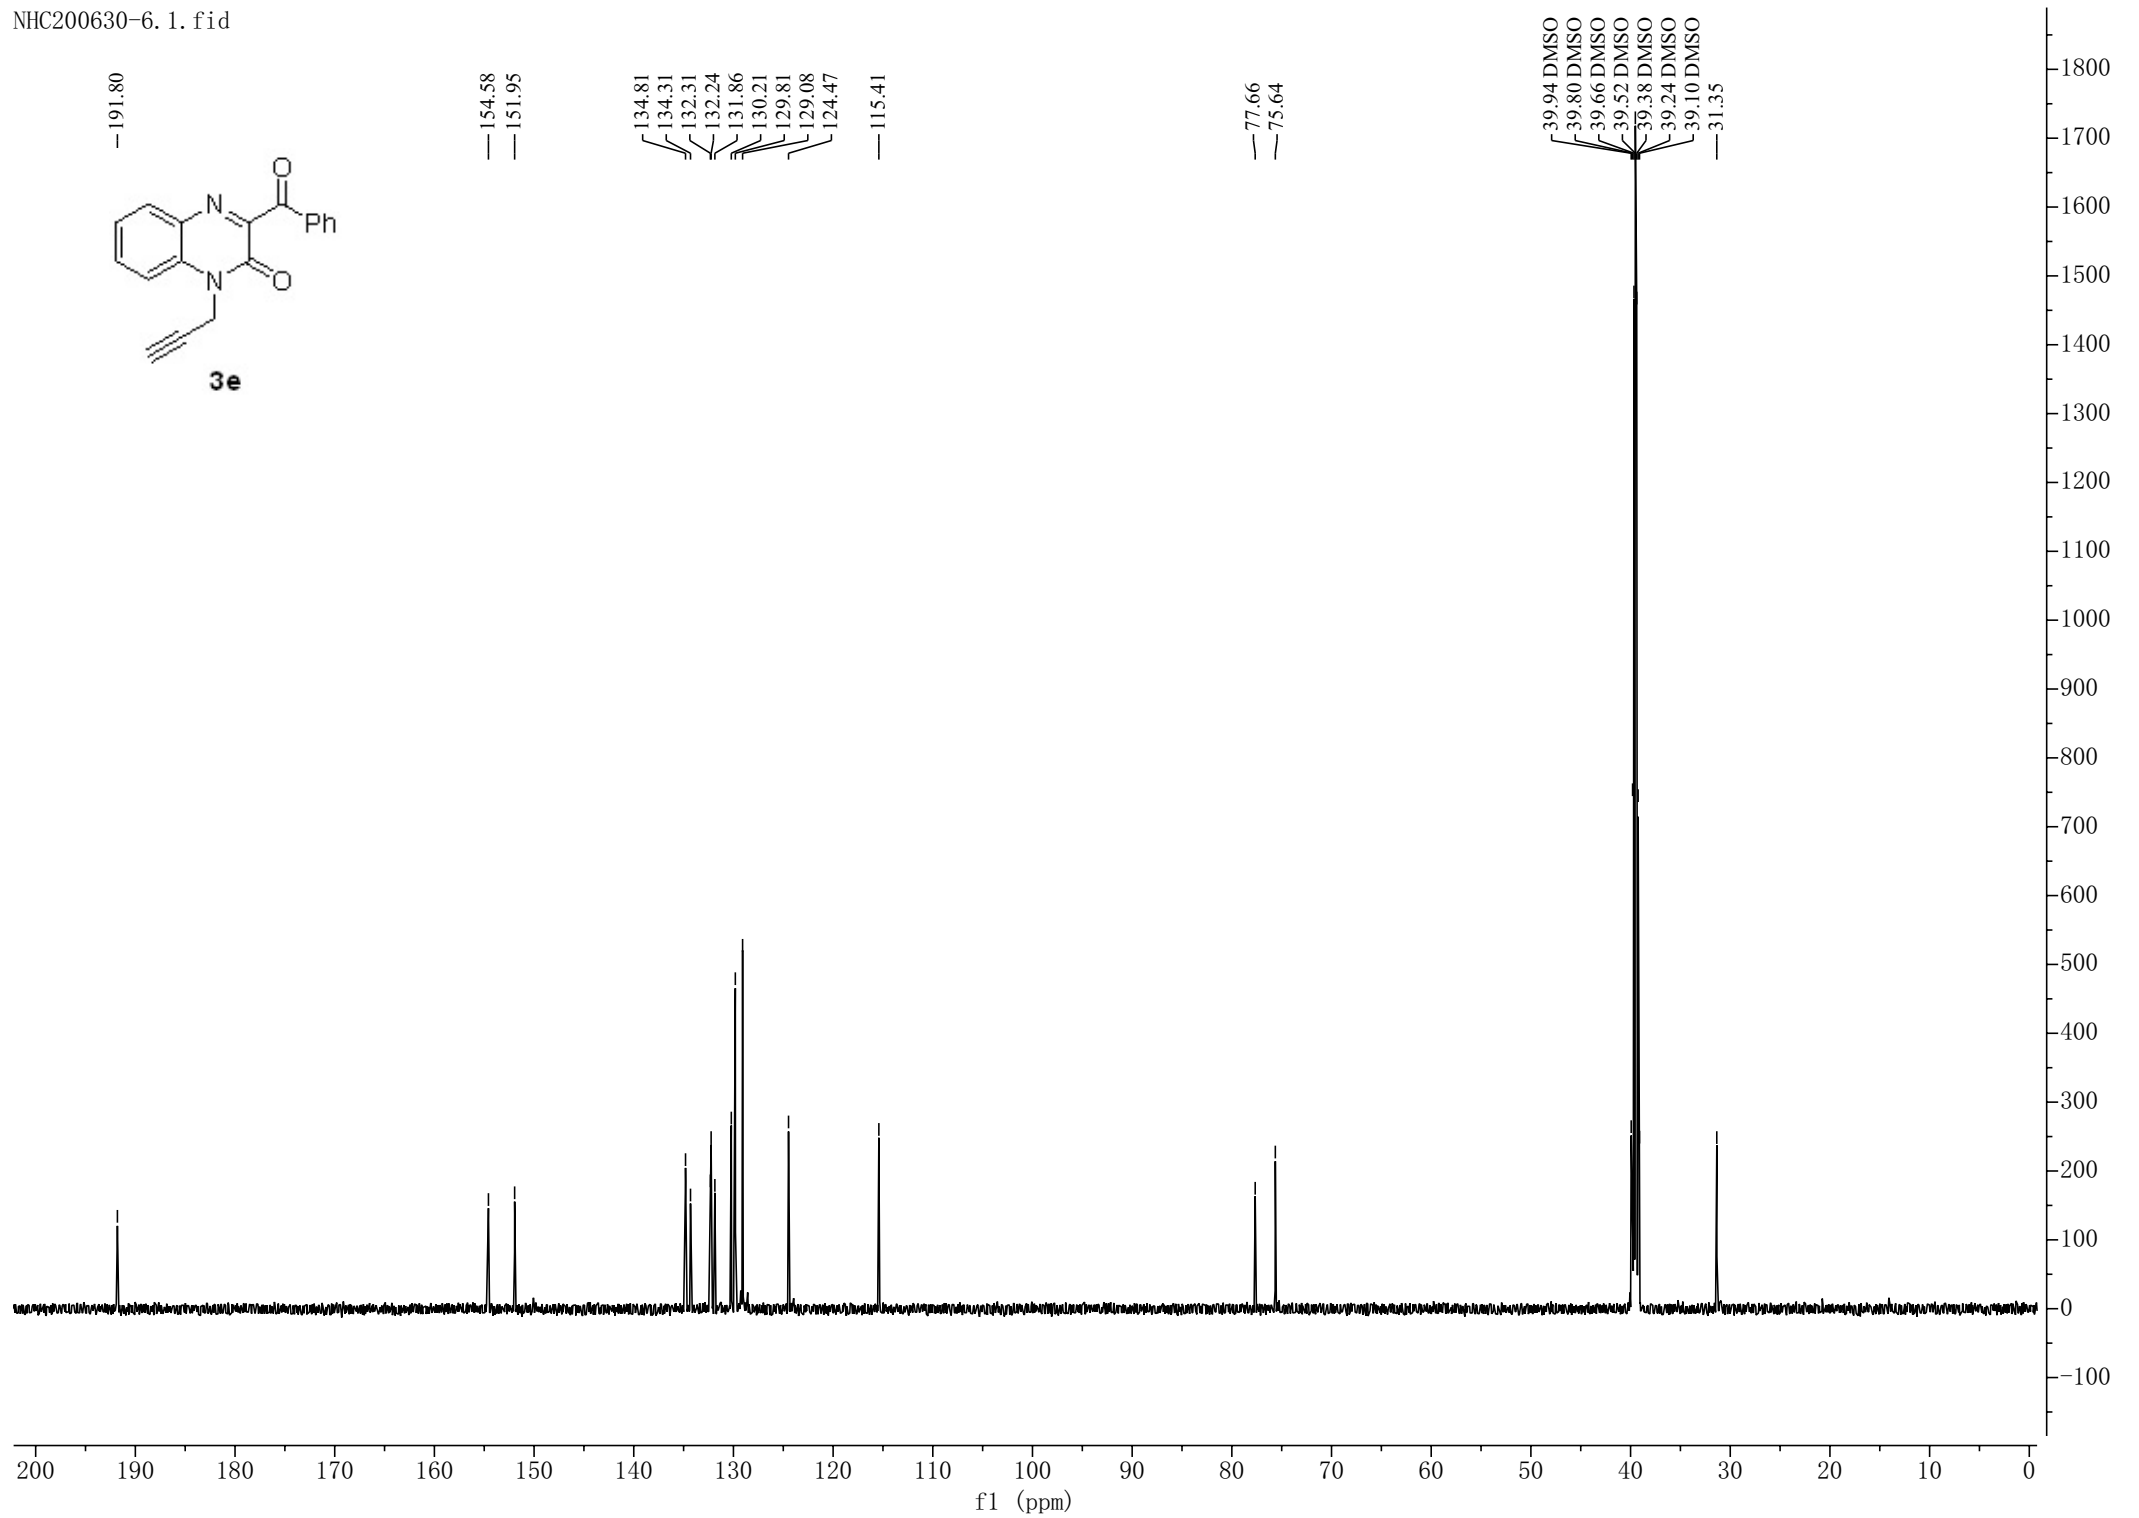

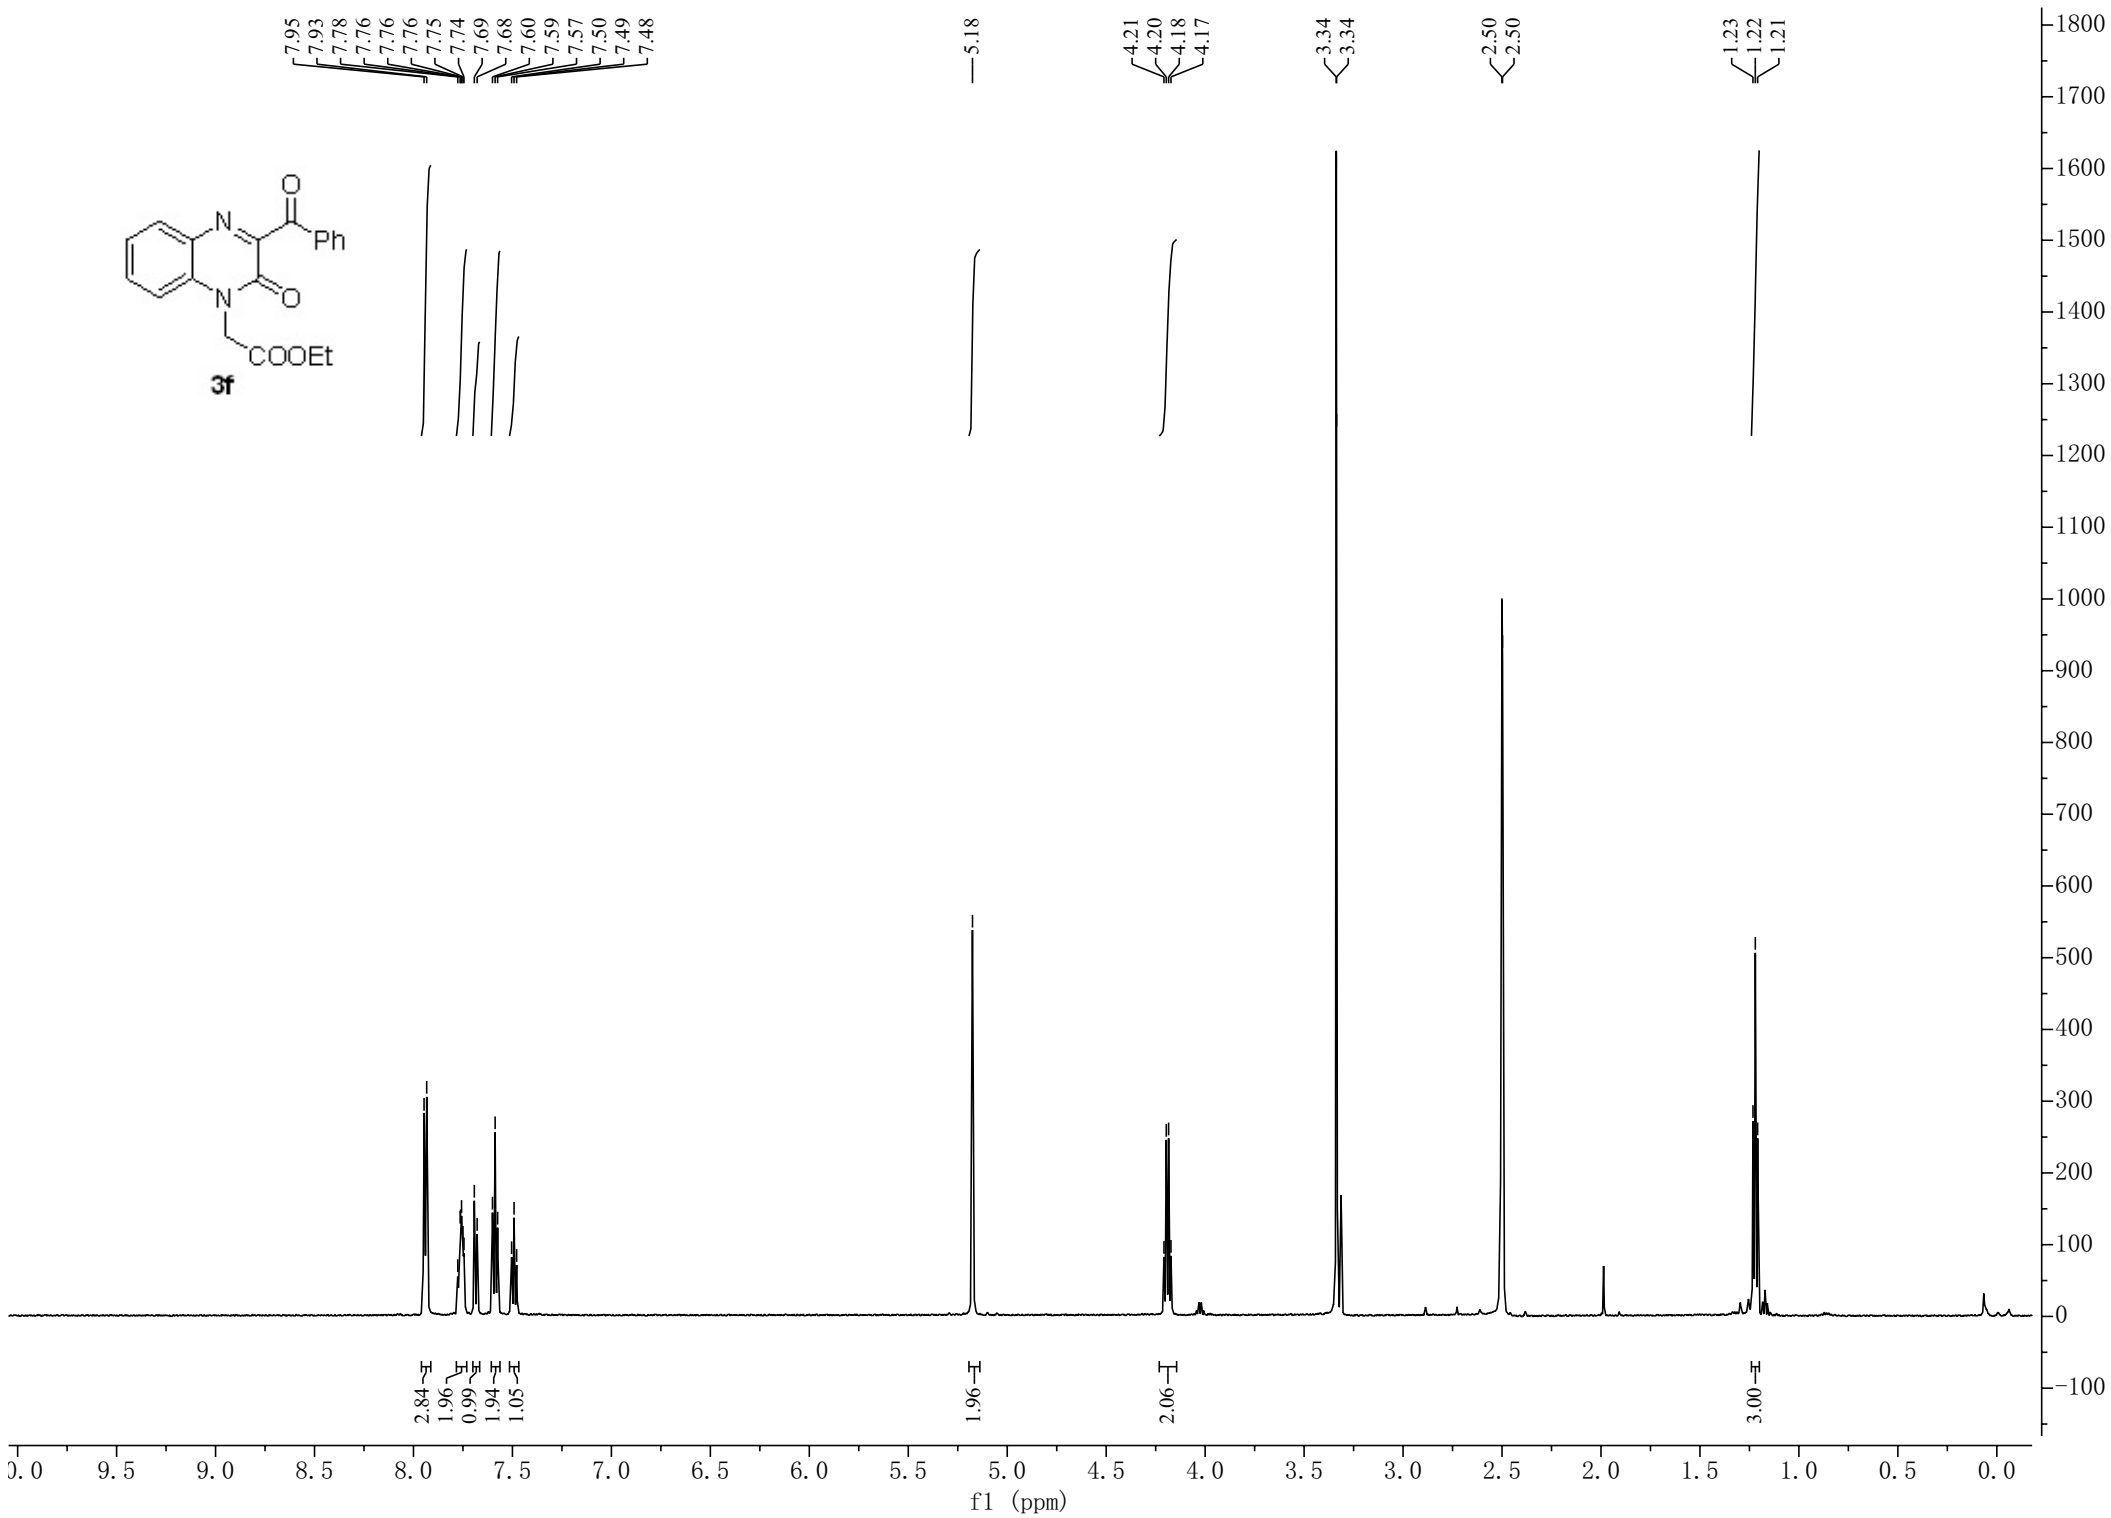

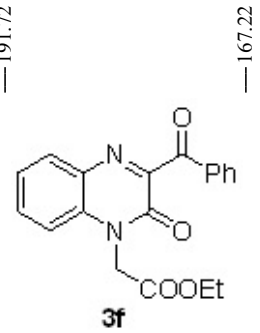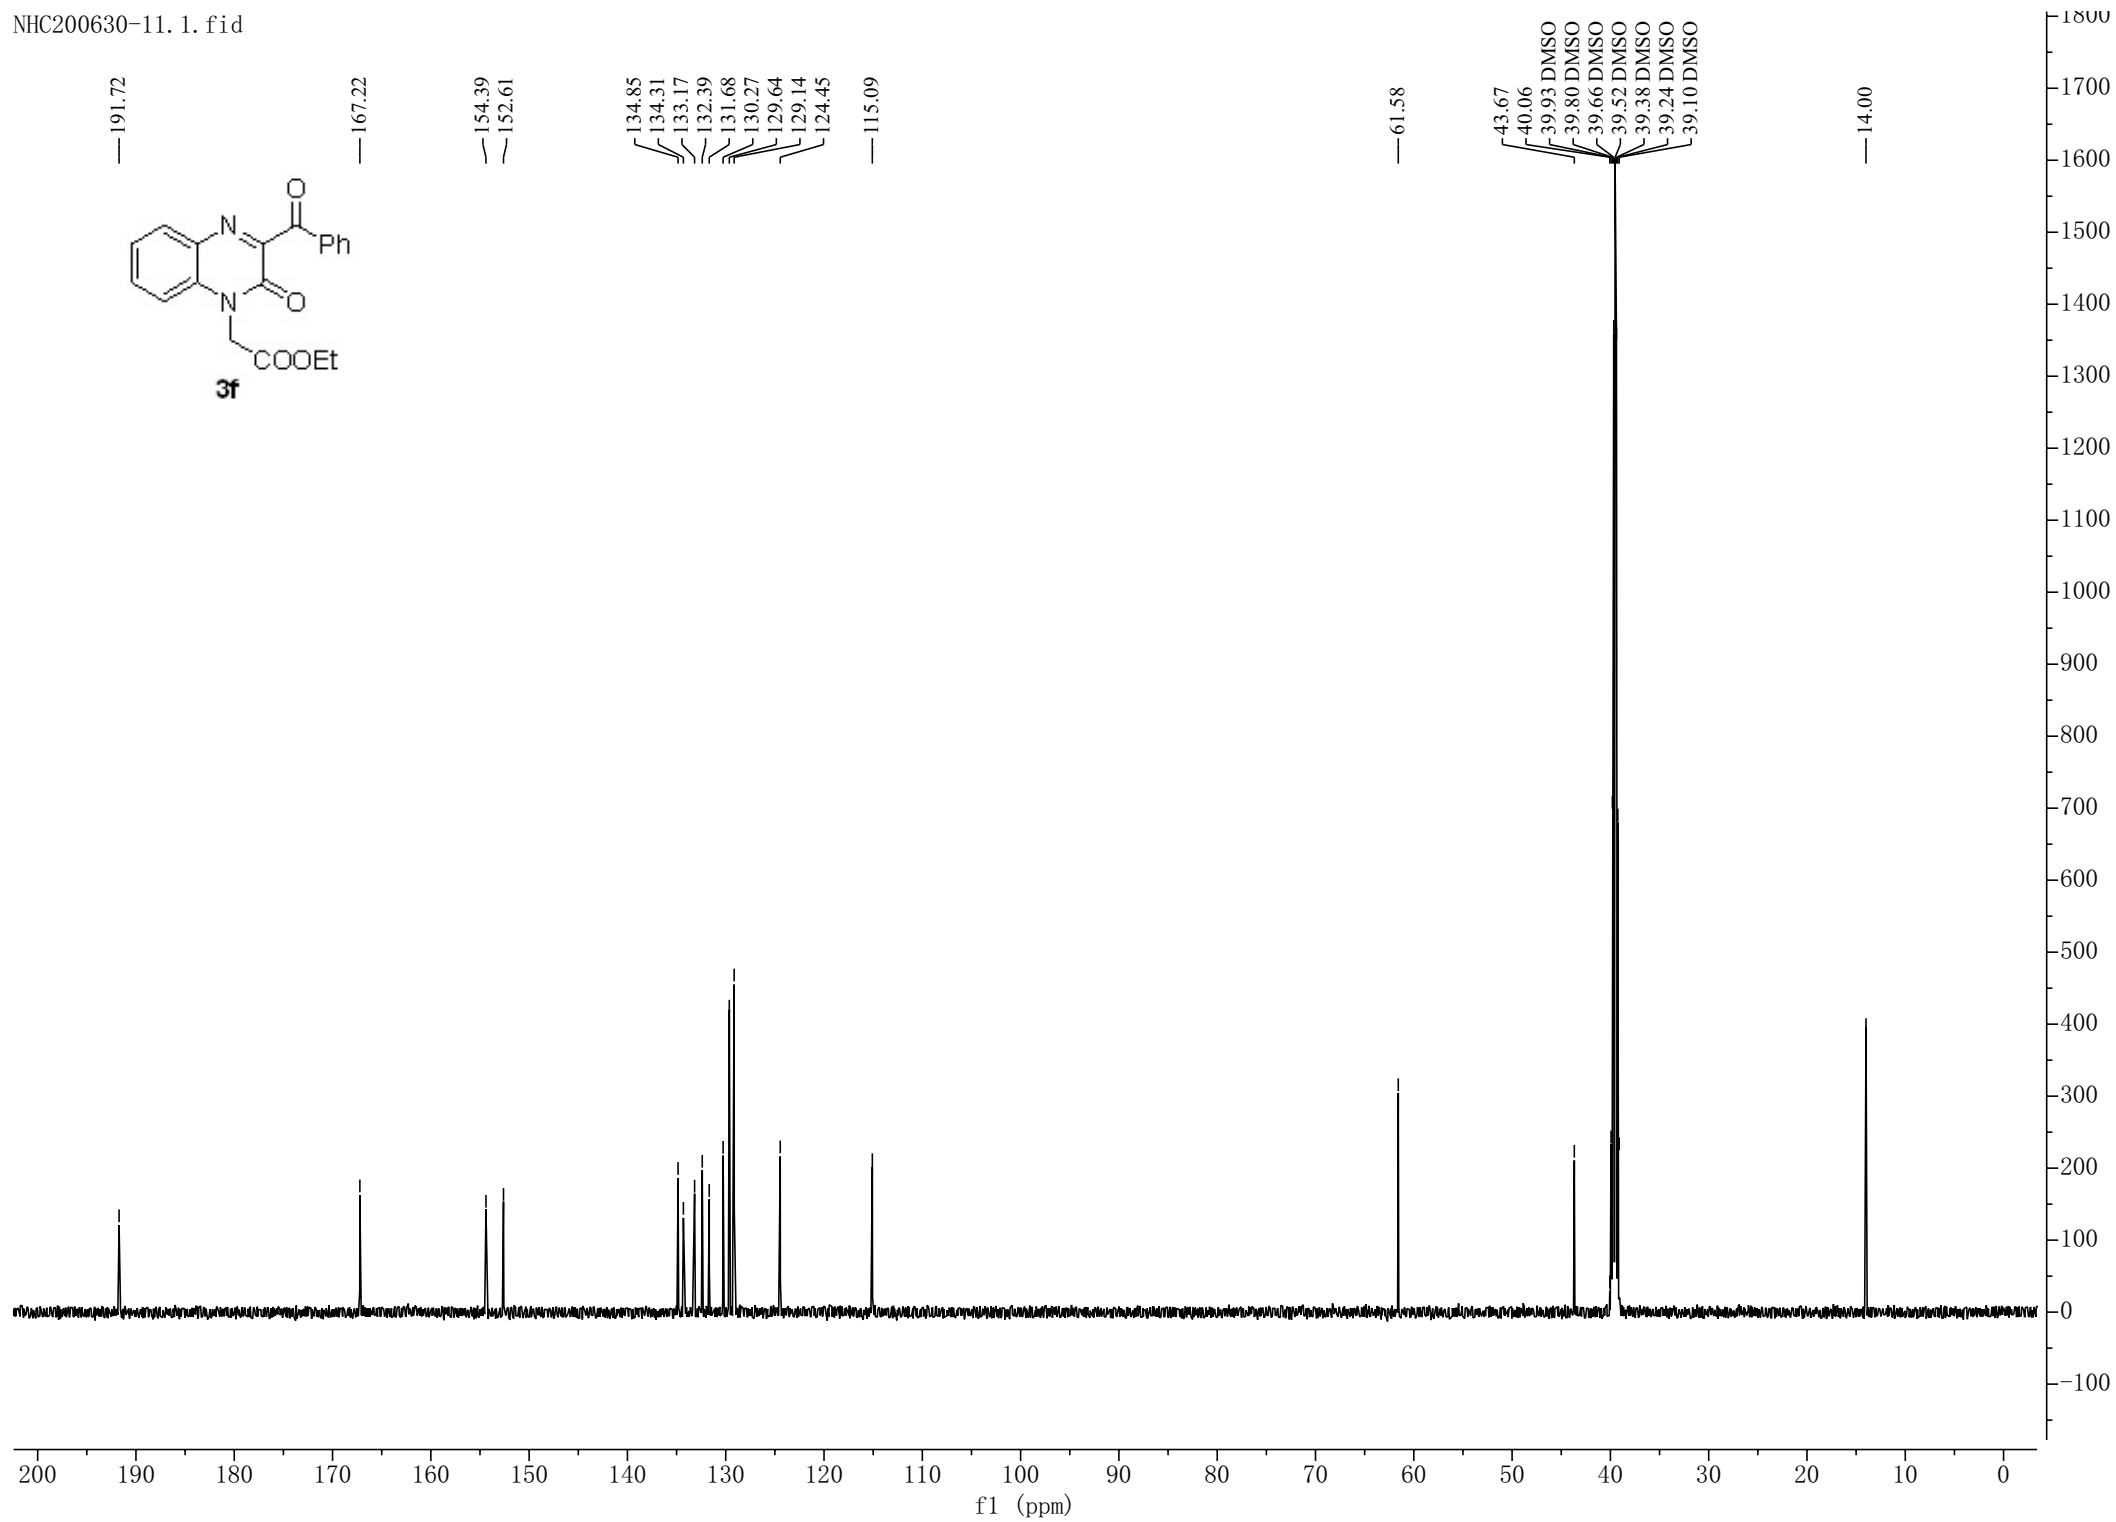

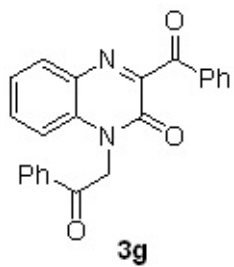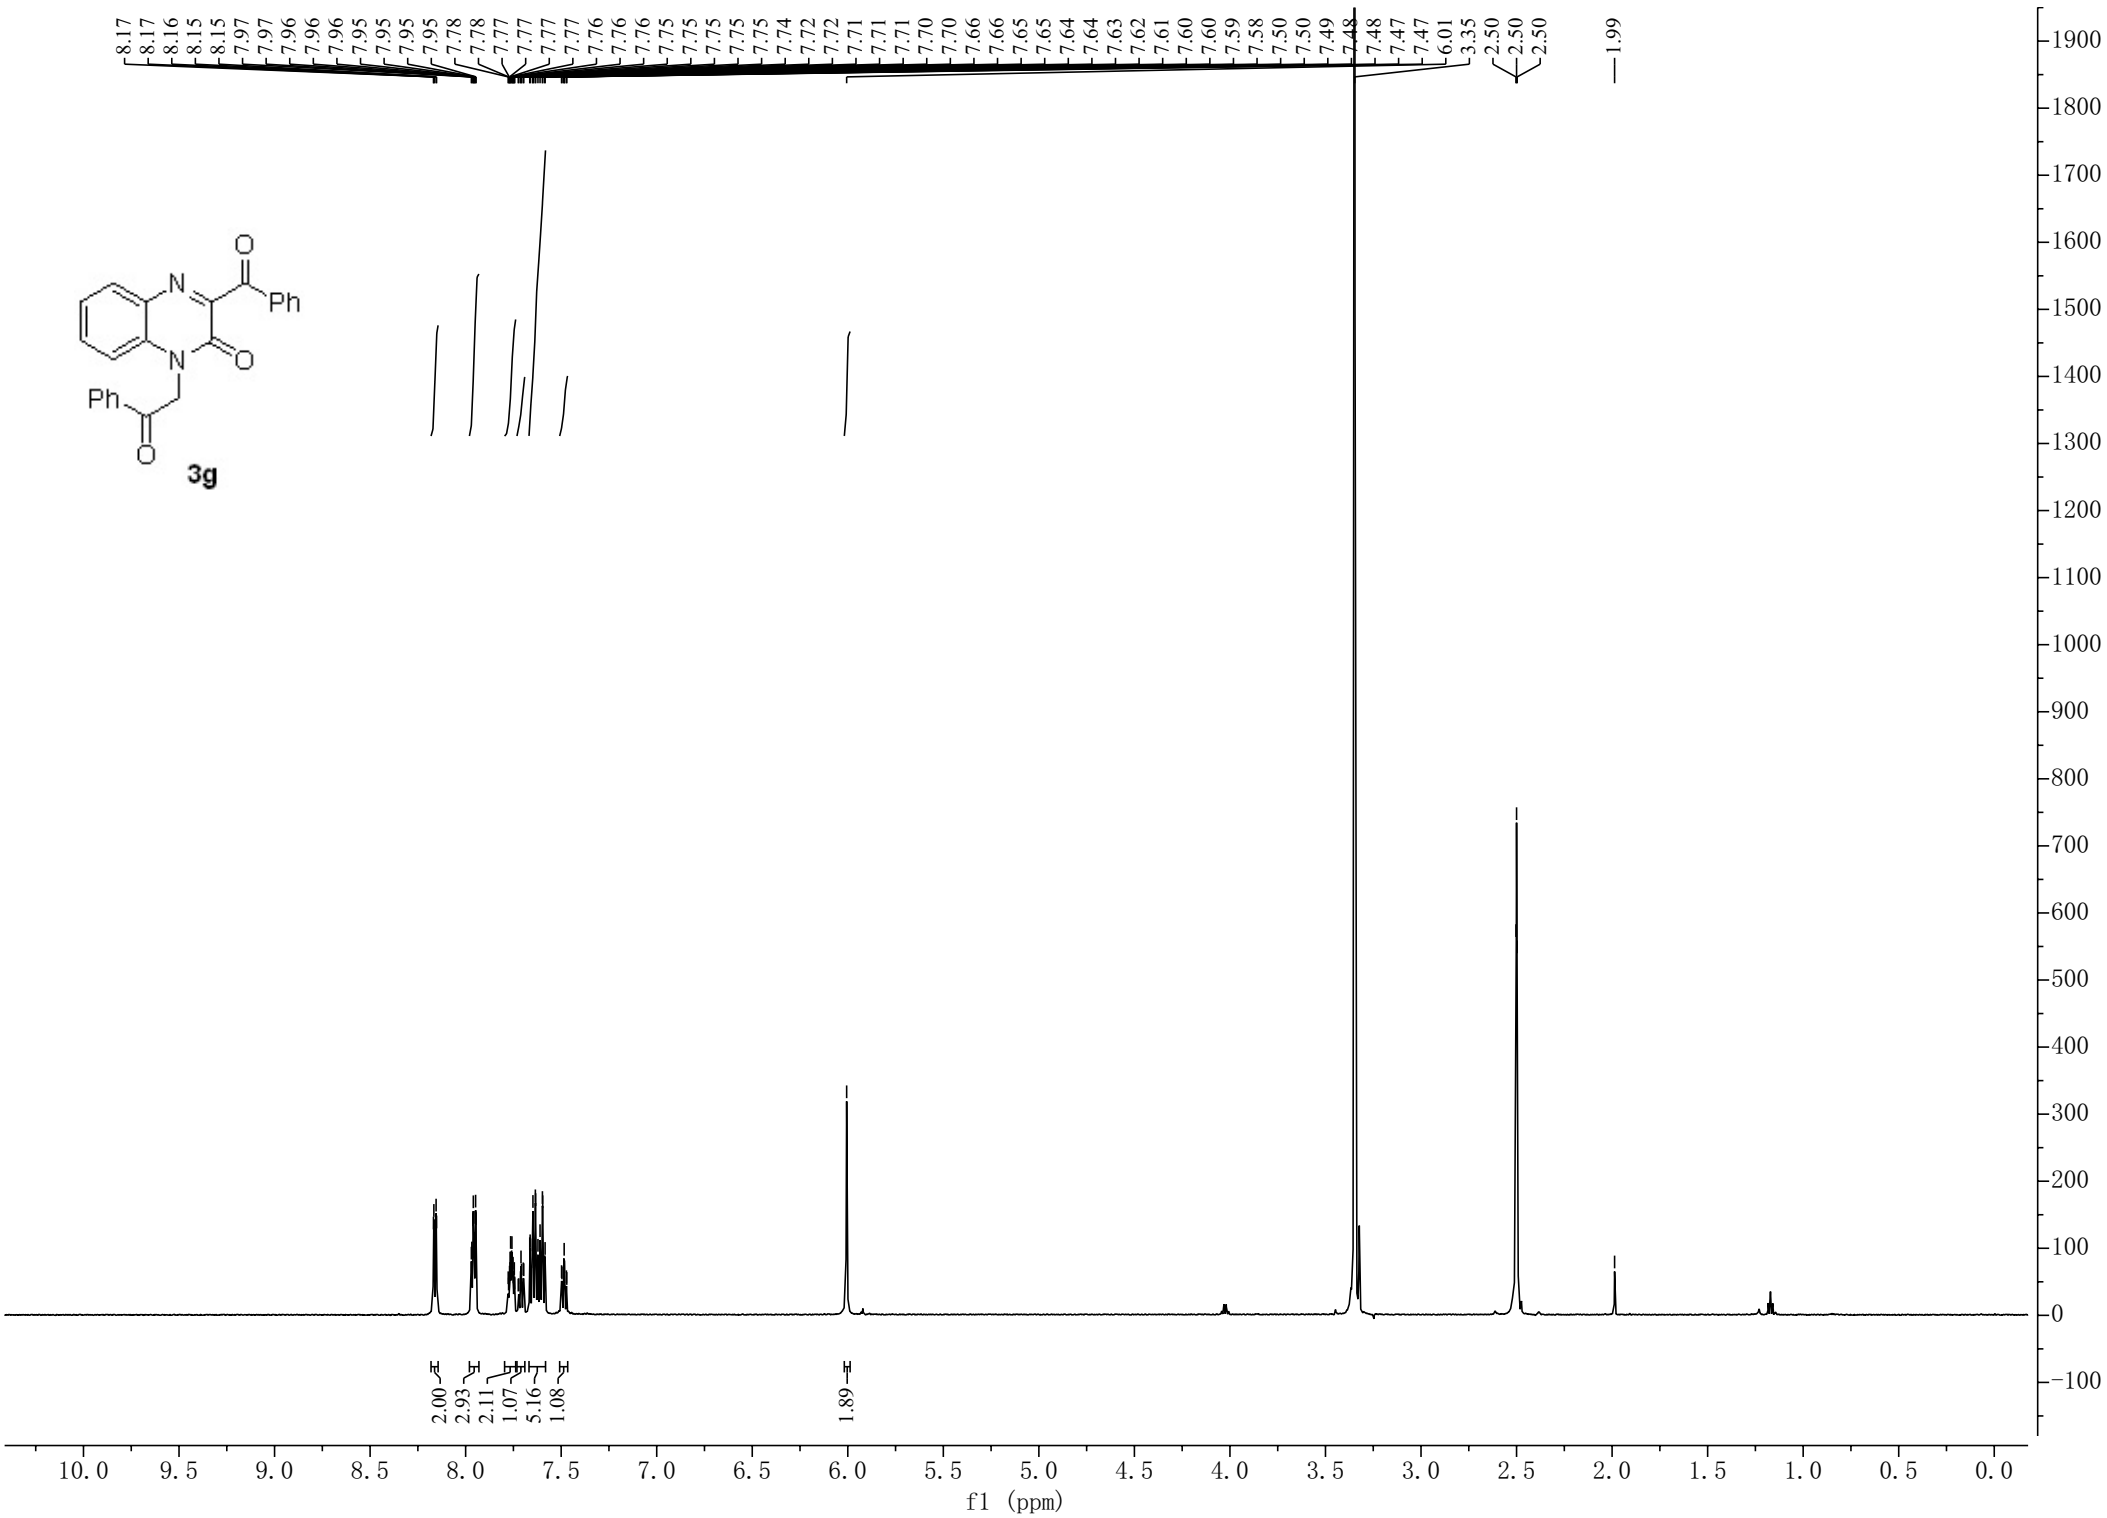

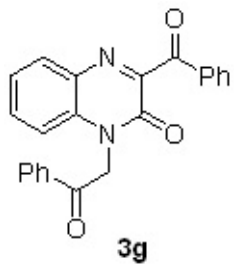

192.09  
191.85

154.37  
152.67

134.81  
134.37  
134.29  
133.59  
132.30  
131.76  
130.20  
129.60  
129.15  
129.00  
128.40  
124.31  
115.39

49.08  
39.93  
39.80  
39.66  
39.52  
39.38  
39.24  
39.10

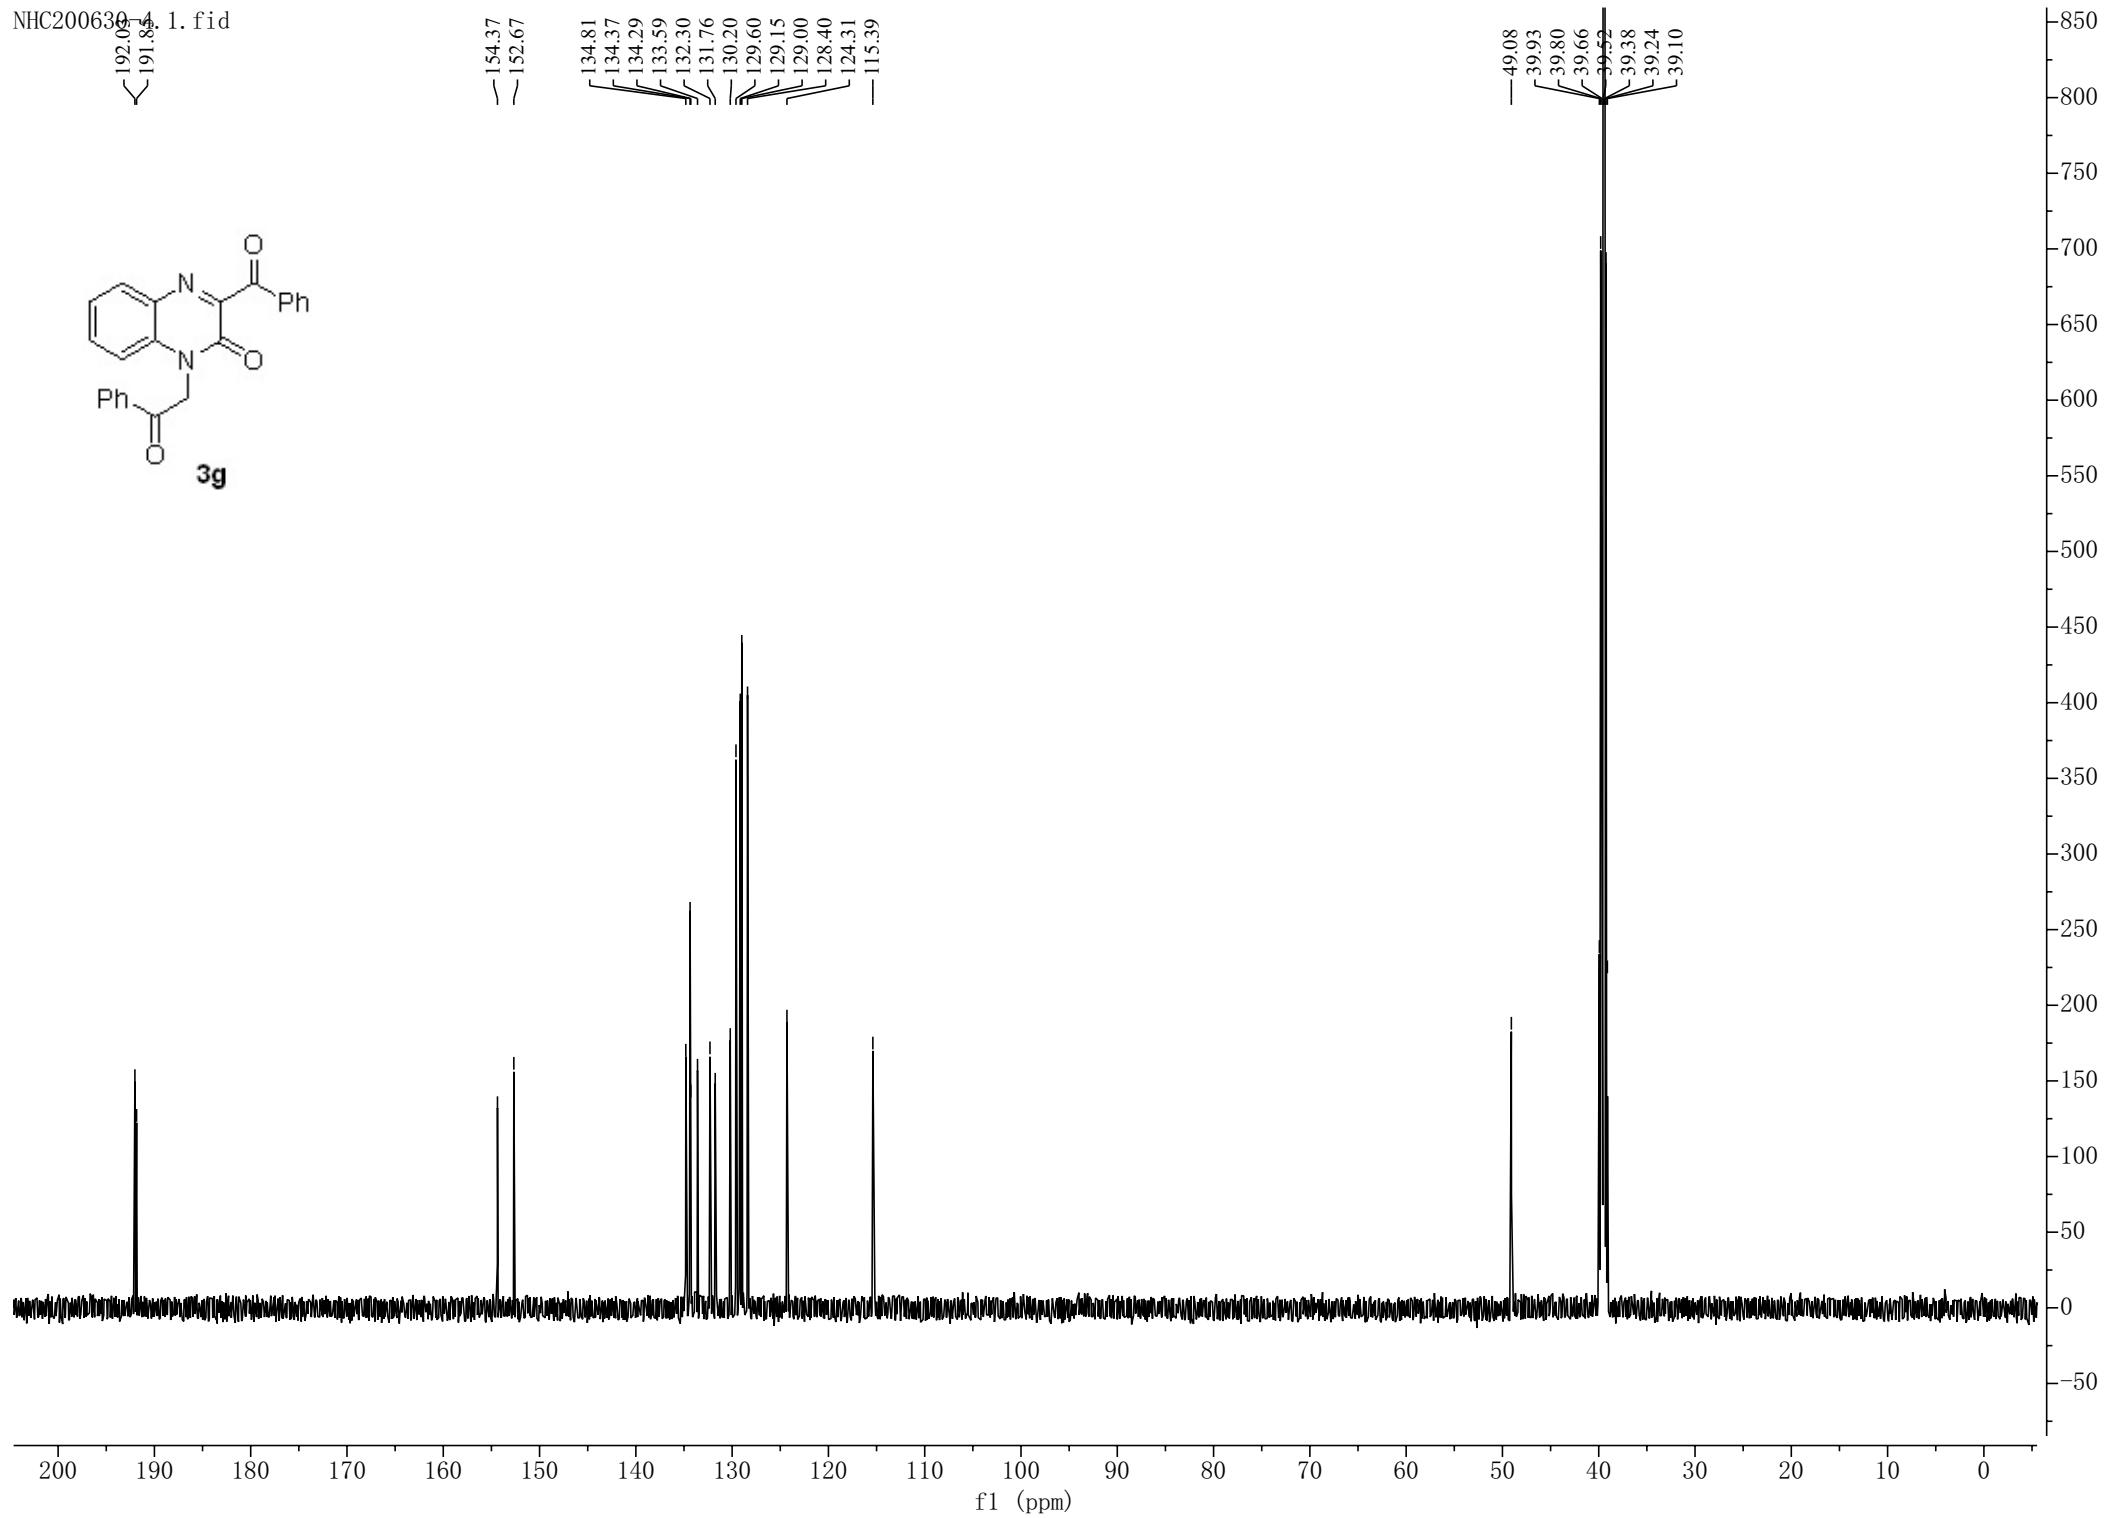

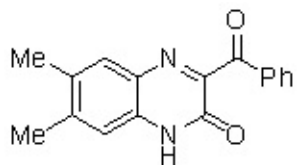

3h

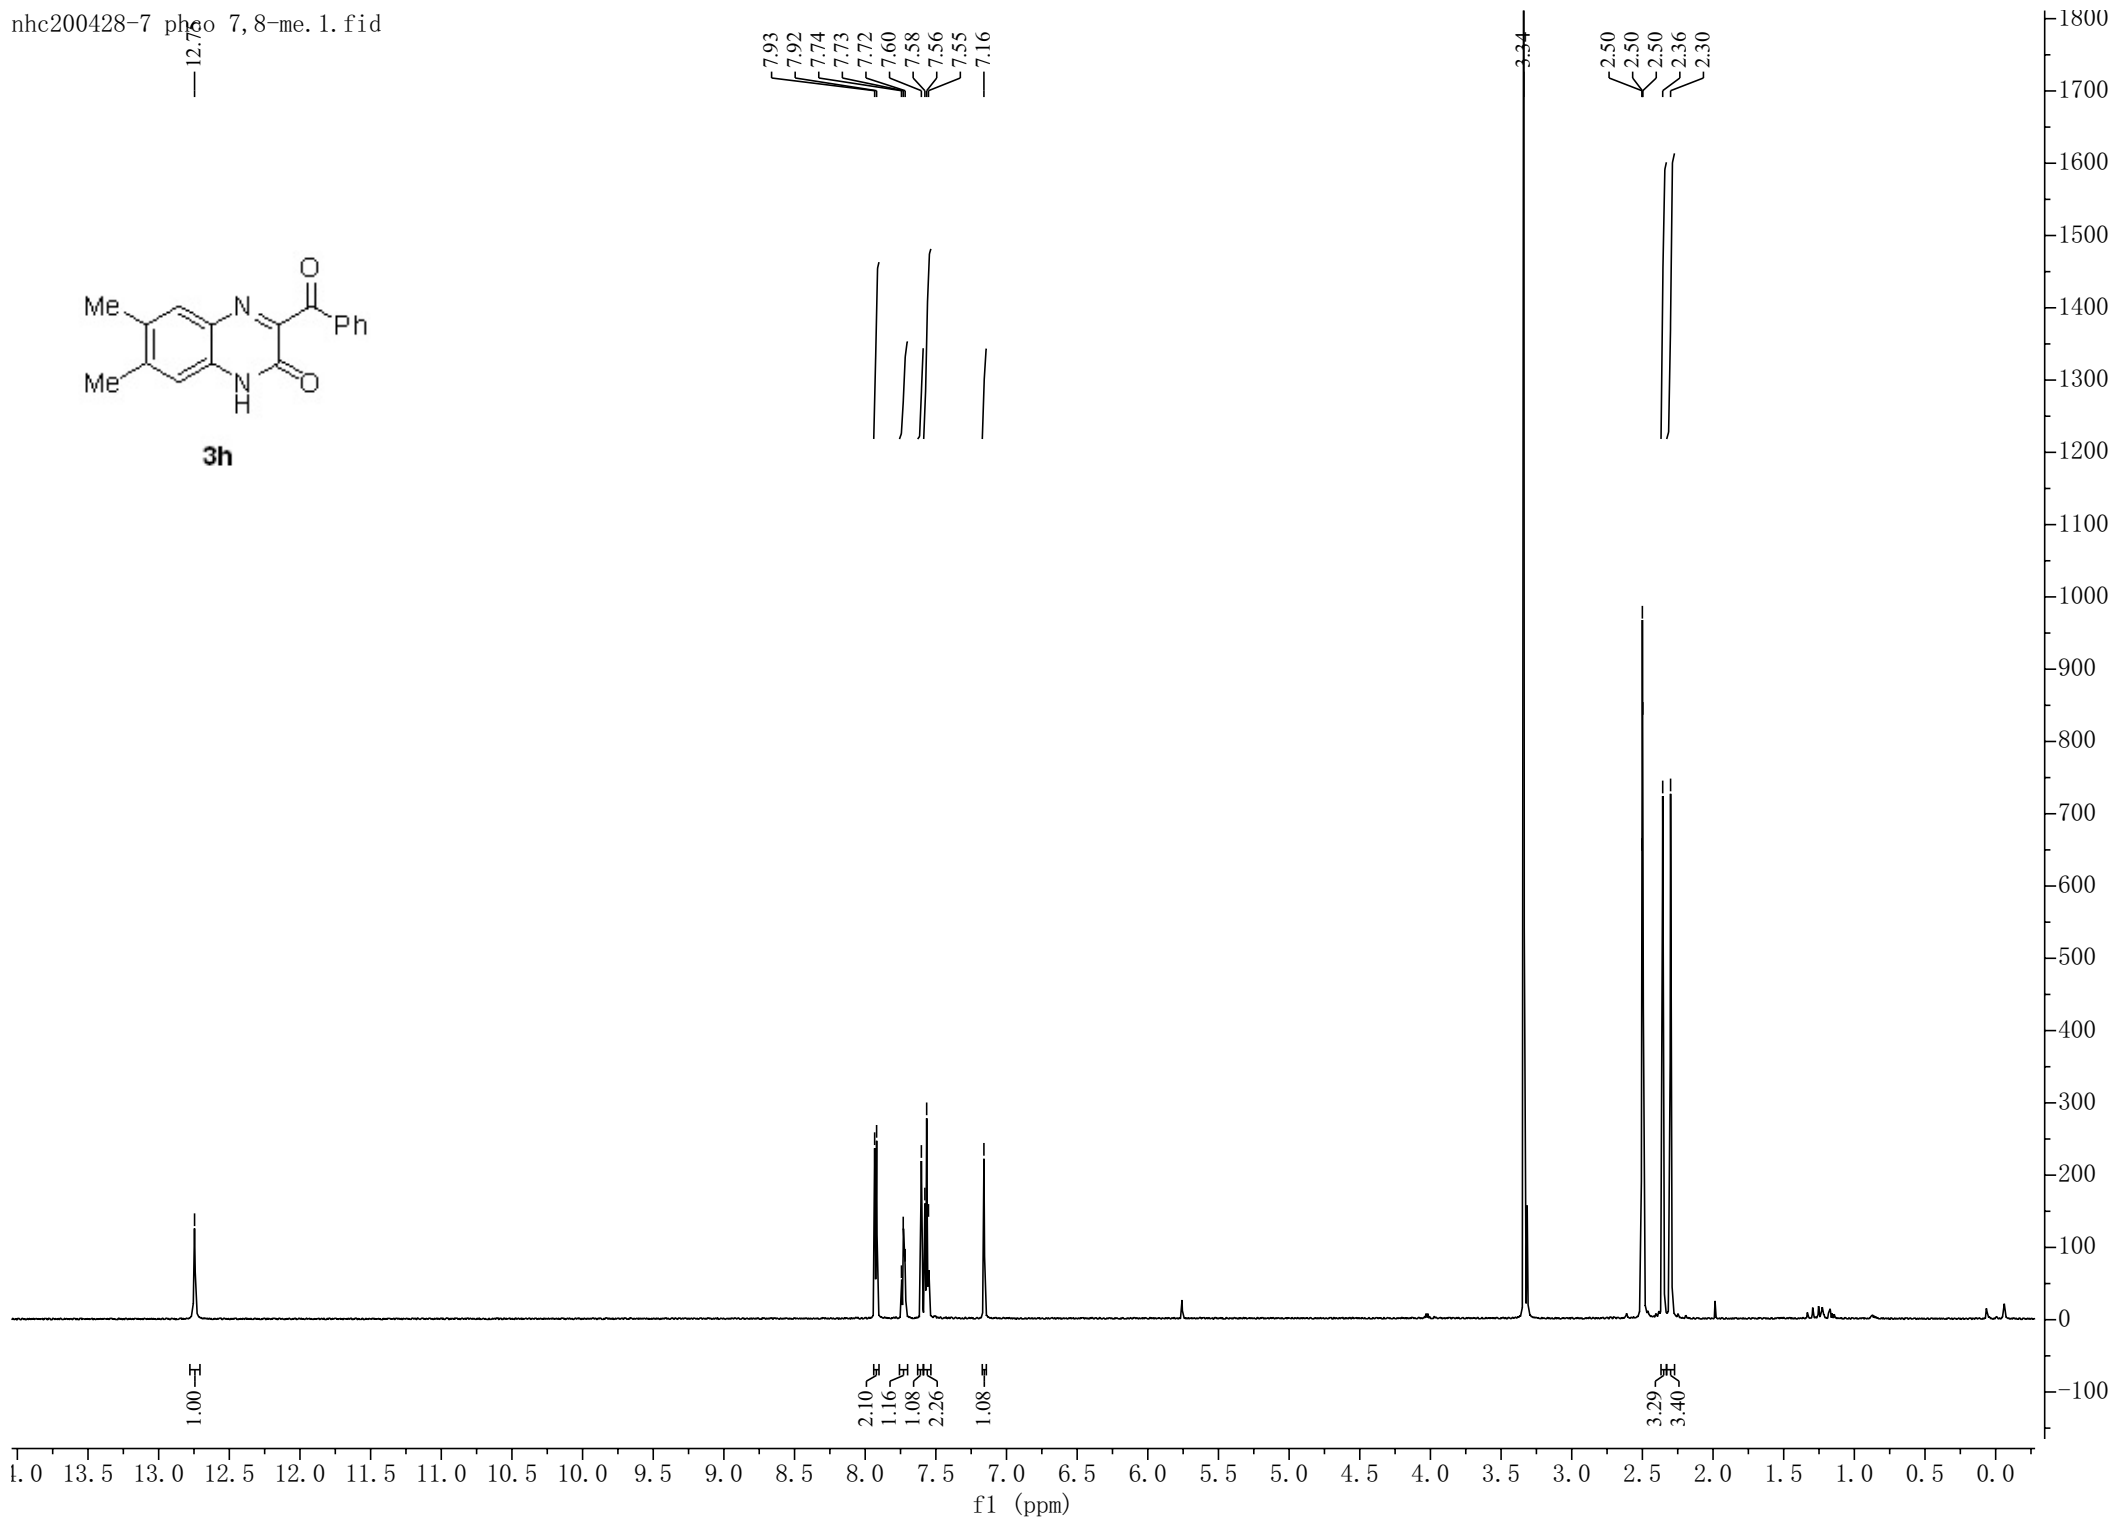

— 192.58

— 154.80  
— 153.46

— 141.80  
— 134.78  
— 134.50  
— 132.77  
— 130.77  
— 129.75  
— 129.62  
— 129.00  
— 128.83

— 115.81

40.06  
39.93 DMSO  
39.80 DMSO  
39.66 DMSO  
39.52 DMSO  
39.38 DMSO  
39.24 DMSO  
39.10 DMSO

— 19.95  
— 18.87

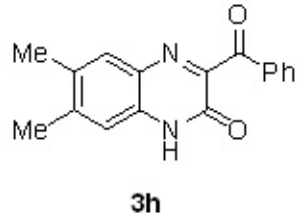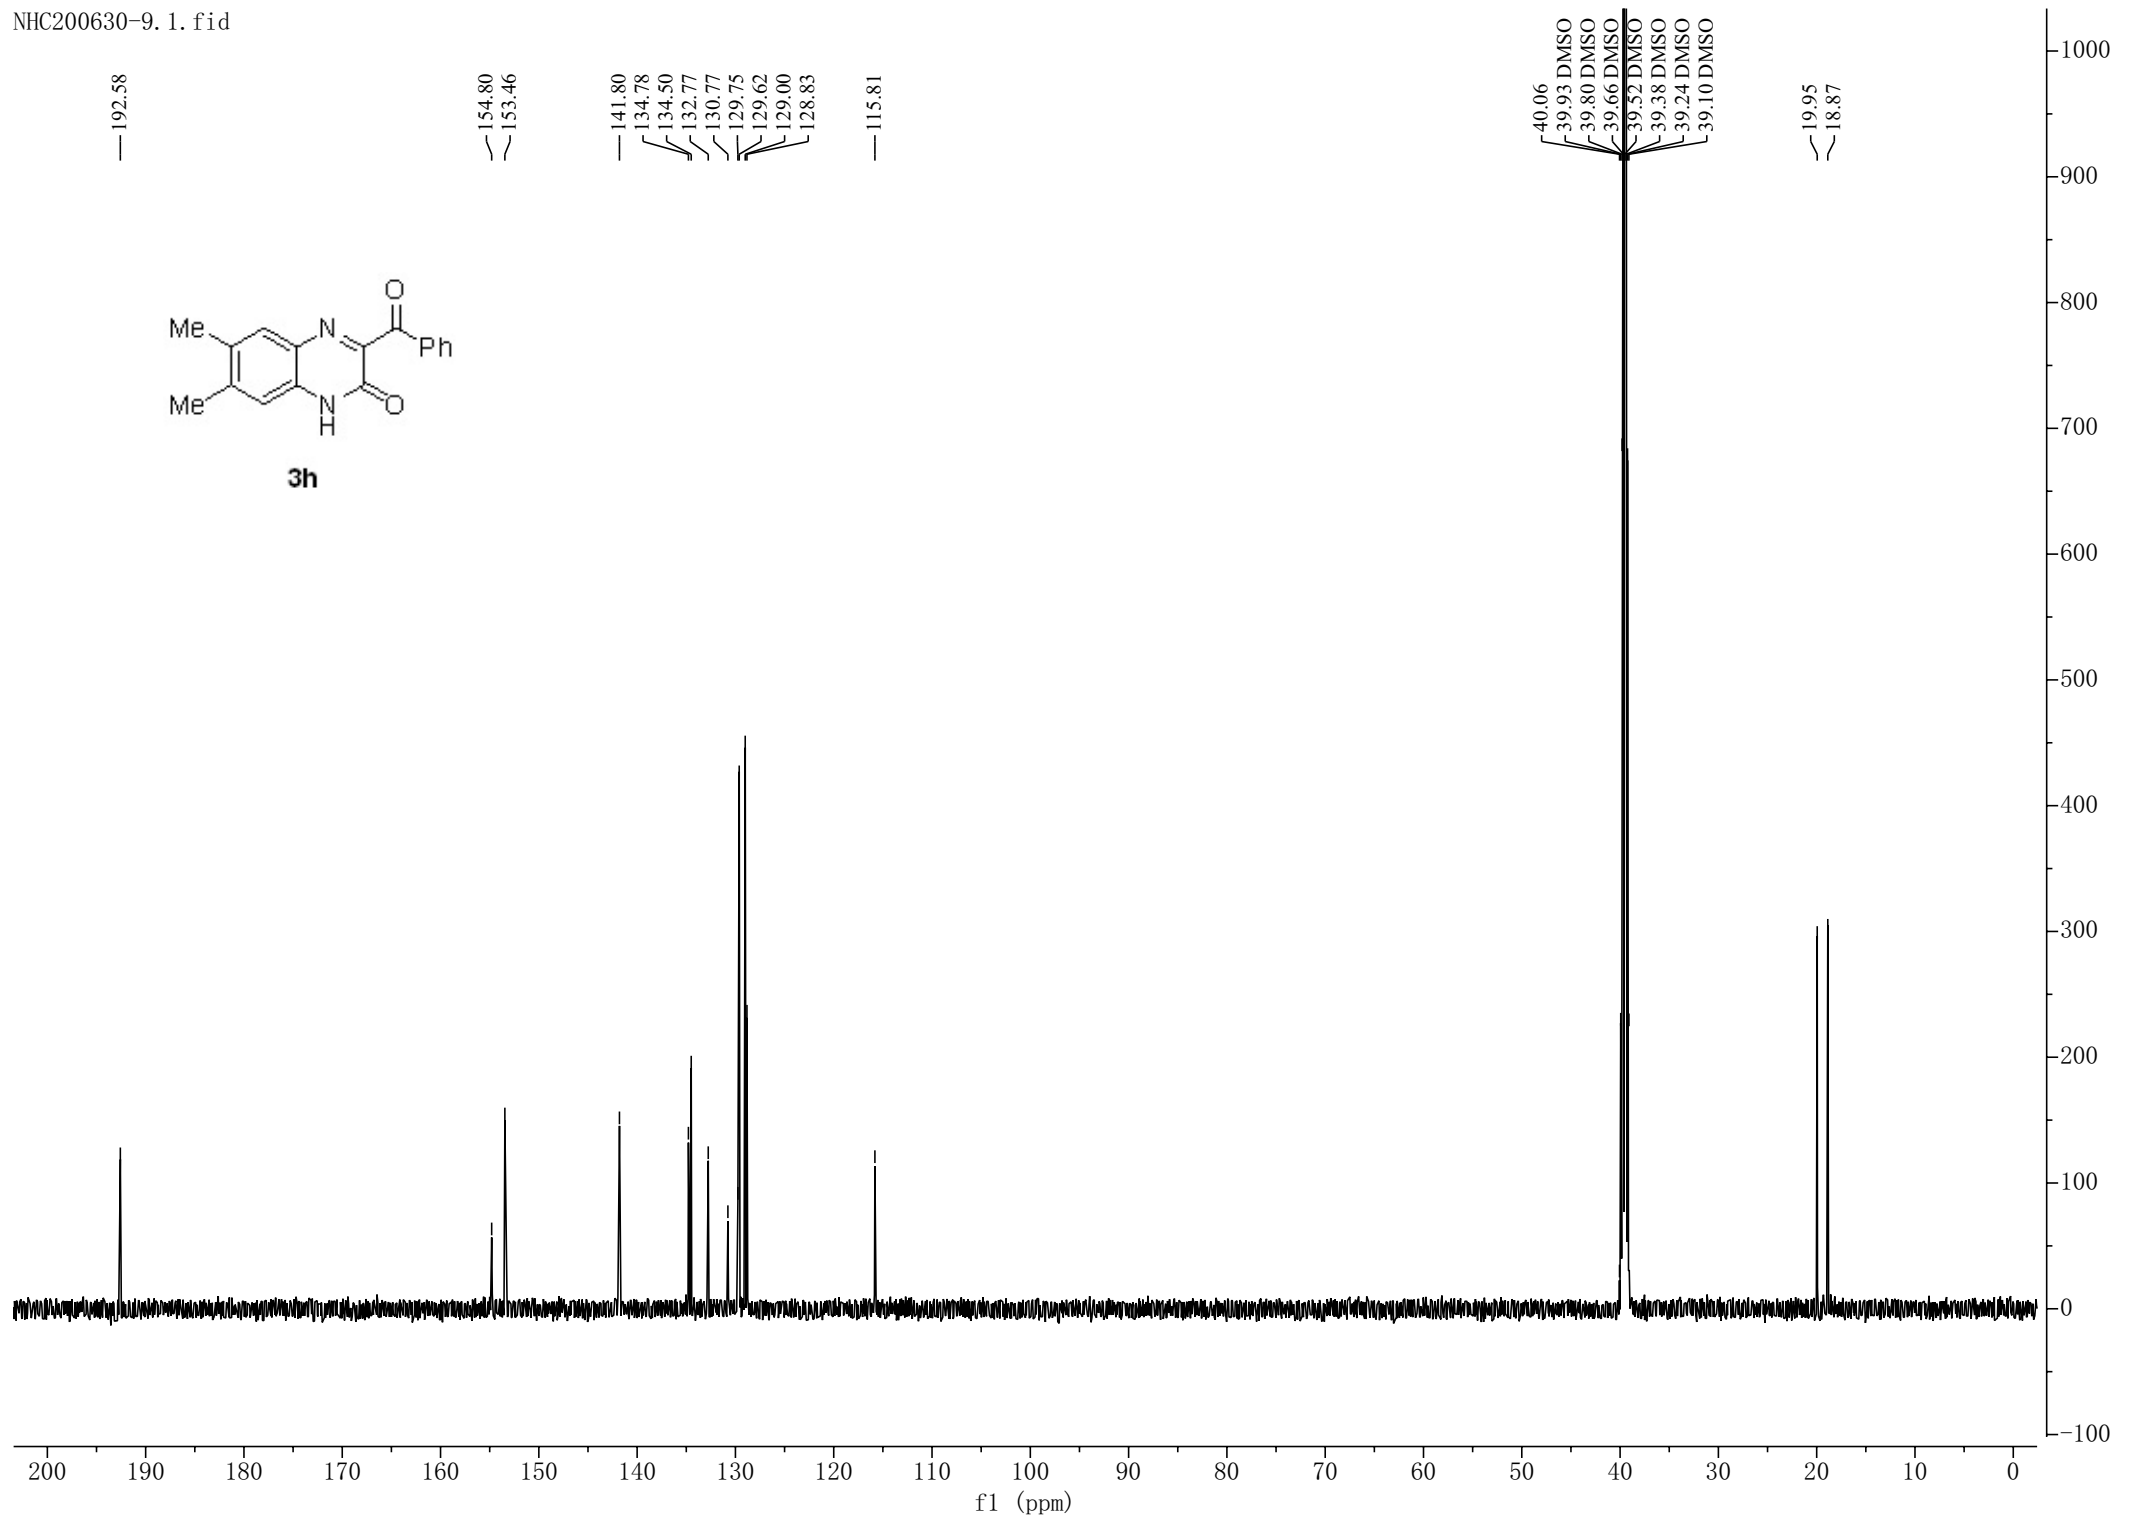



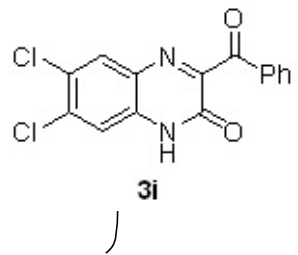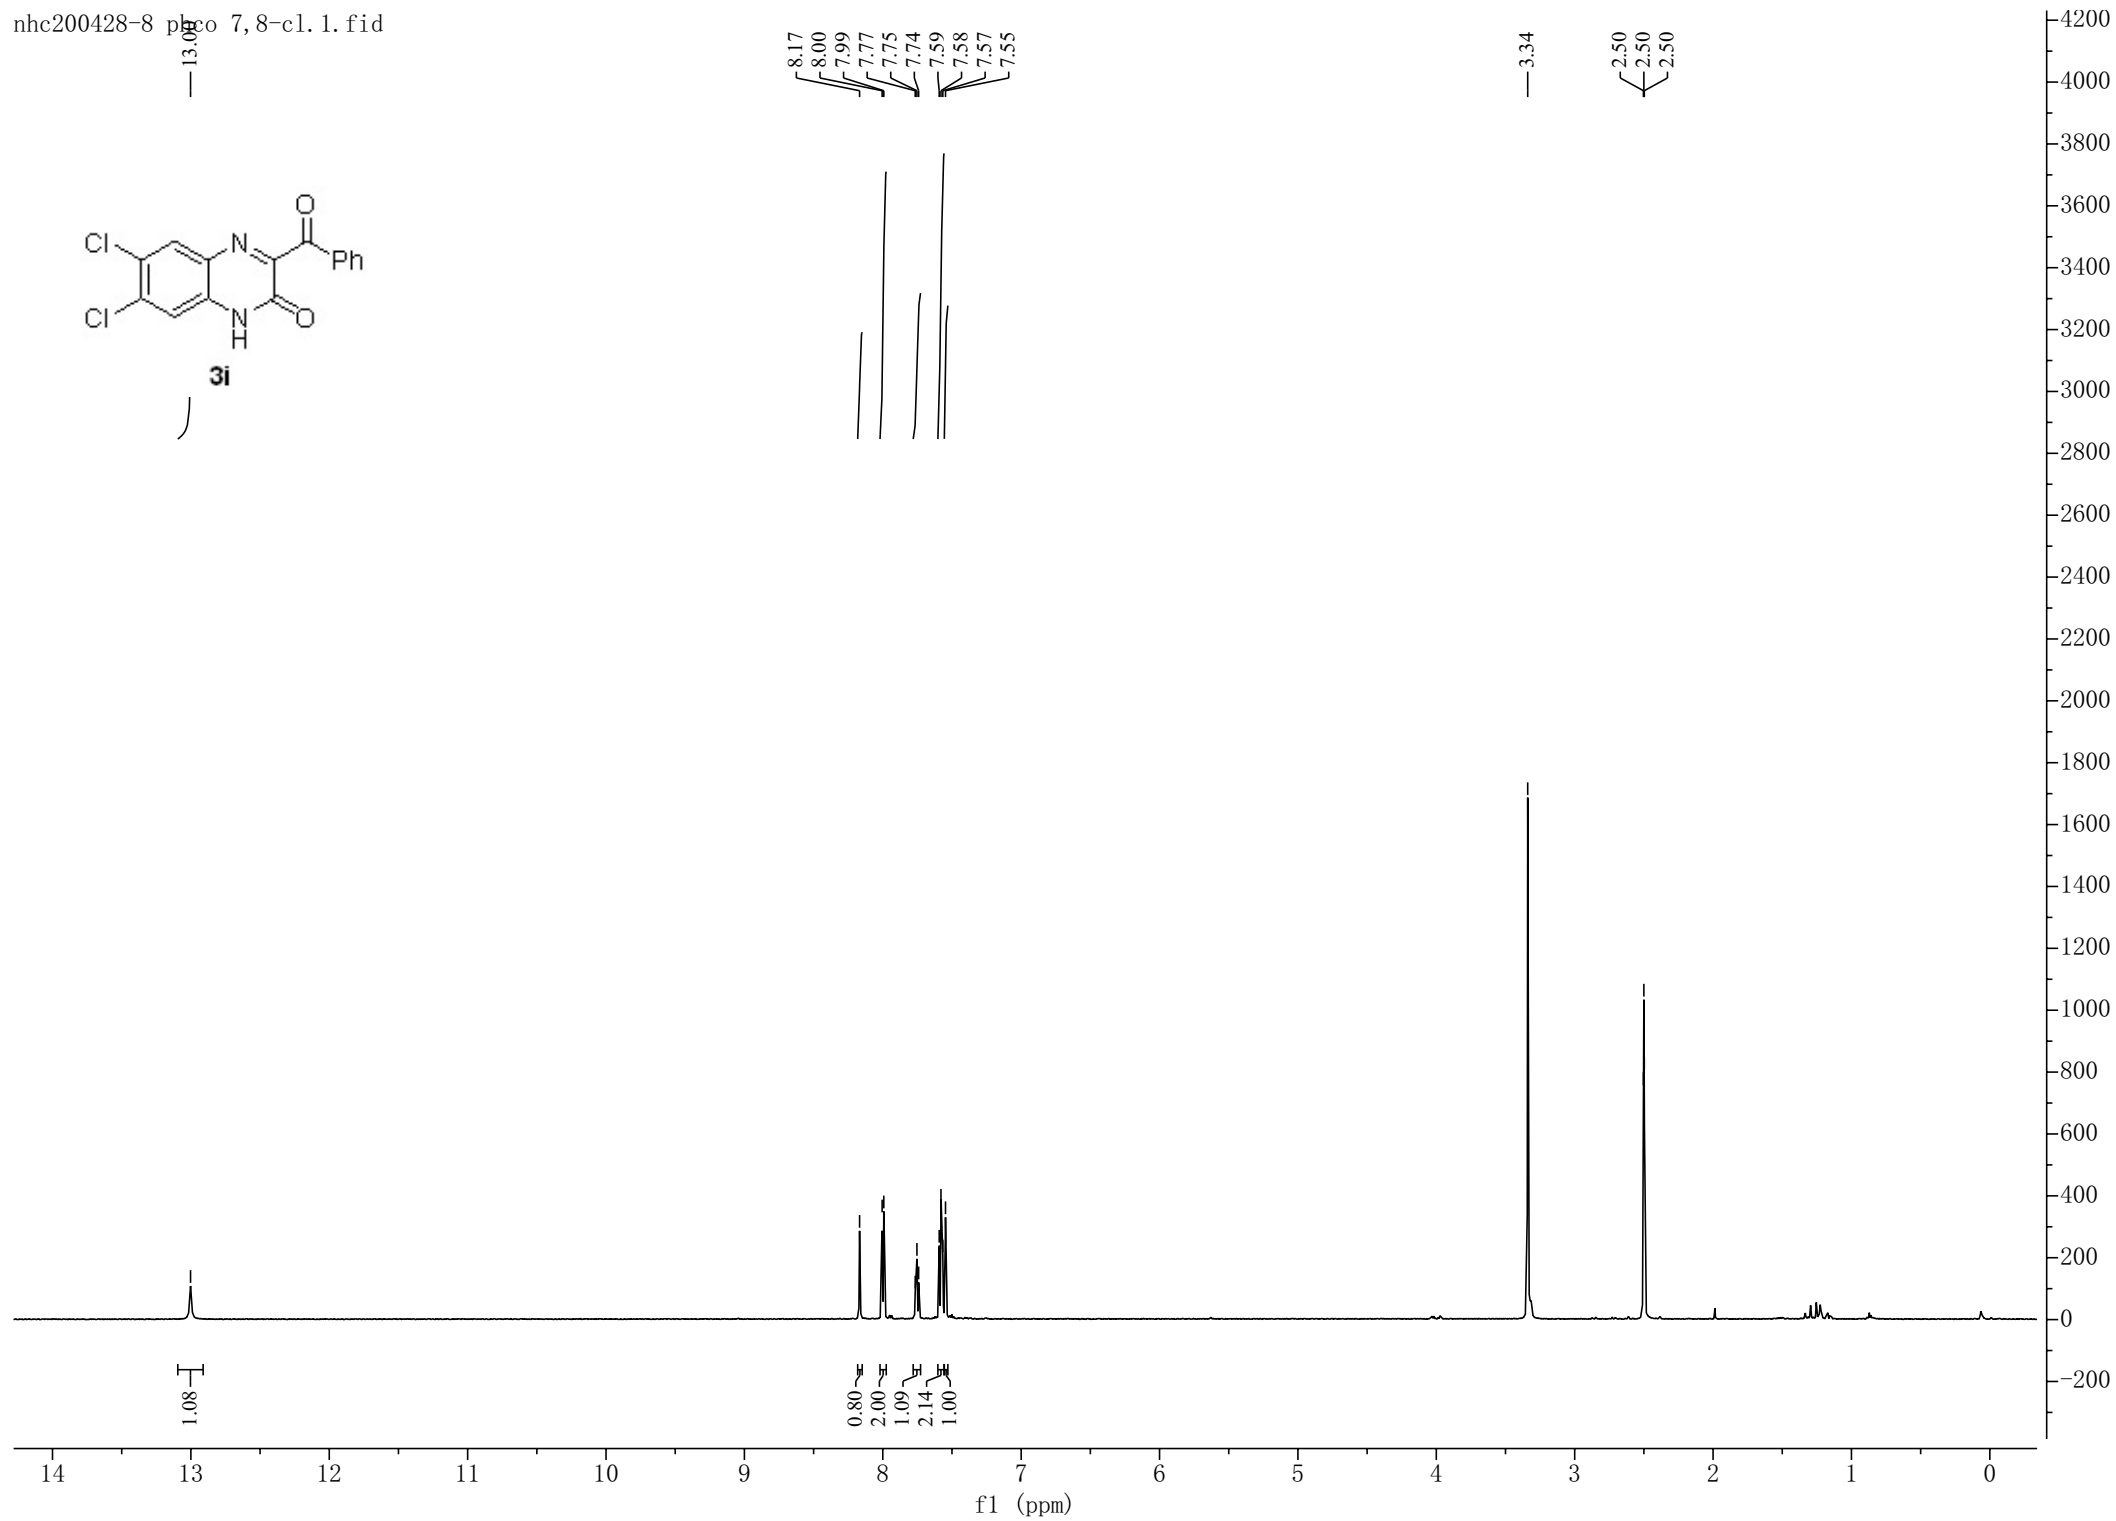

191.86

157.66

153.07

134.87

134.29

133.81

132.67

130.72

130.13

129.79

129.06

125.61

116.93

39.93

39.80

39.66

39.52

39.38

39.24

39.10

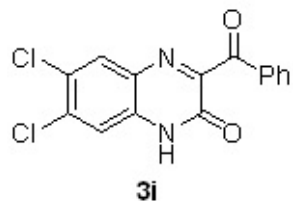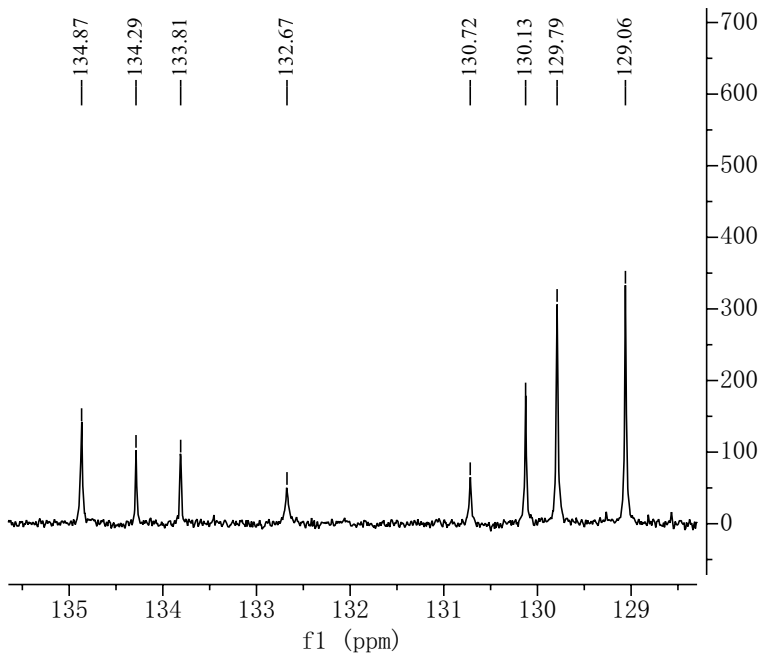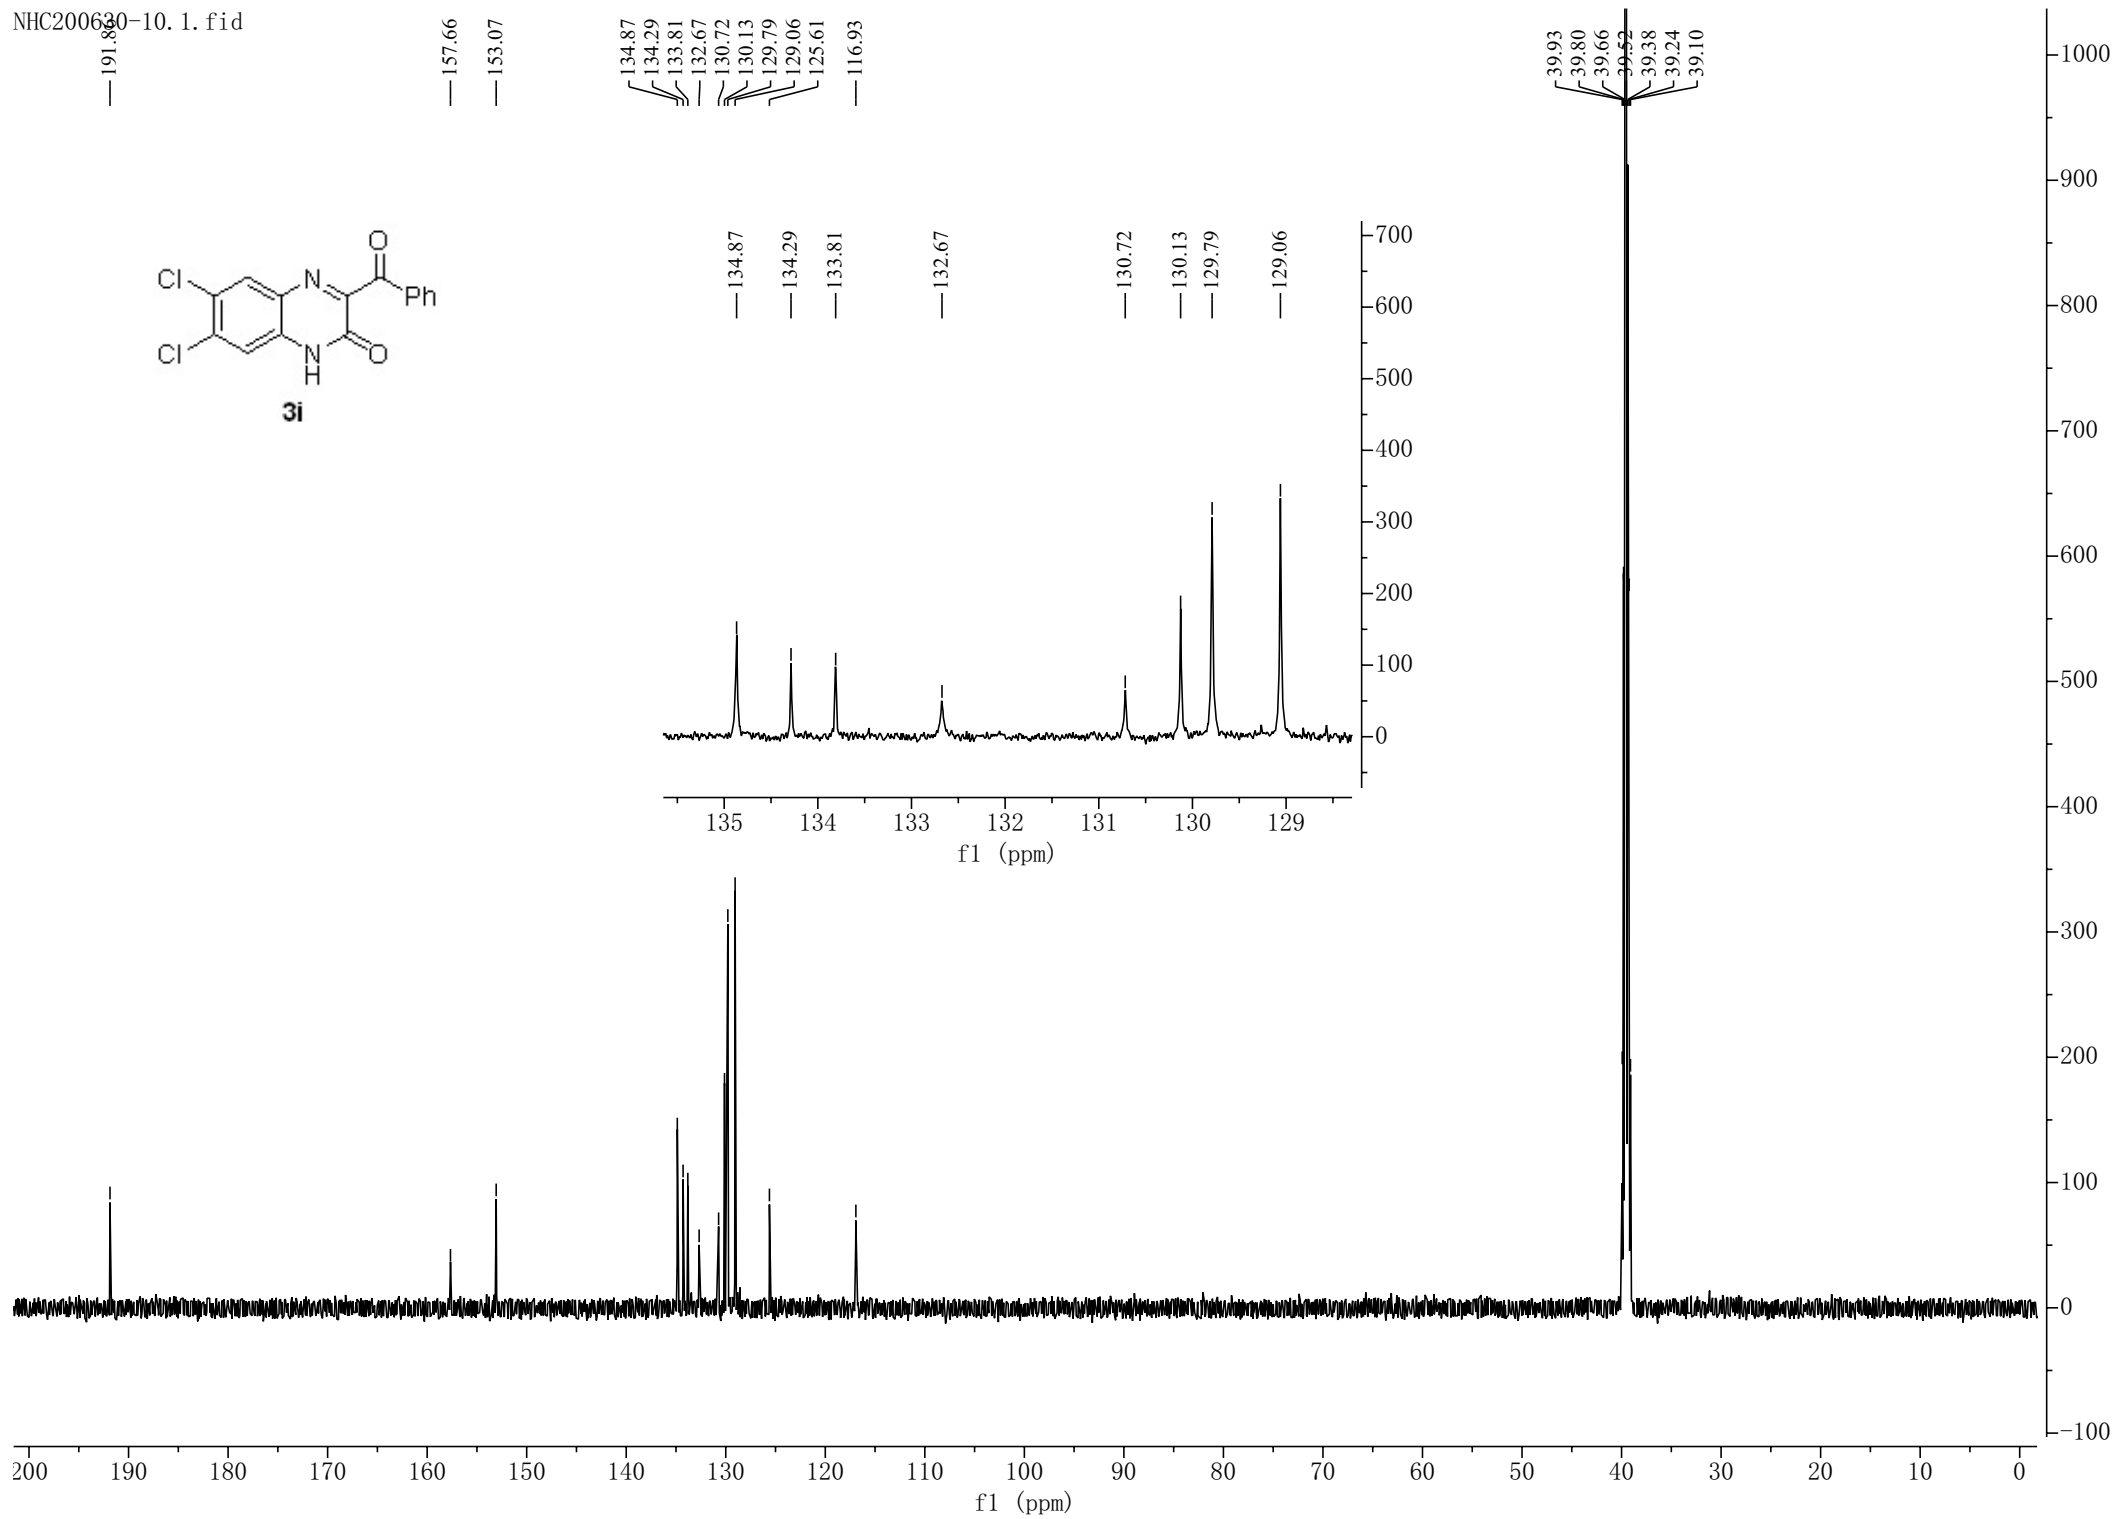

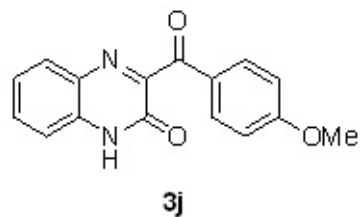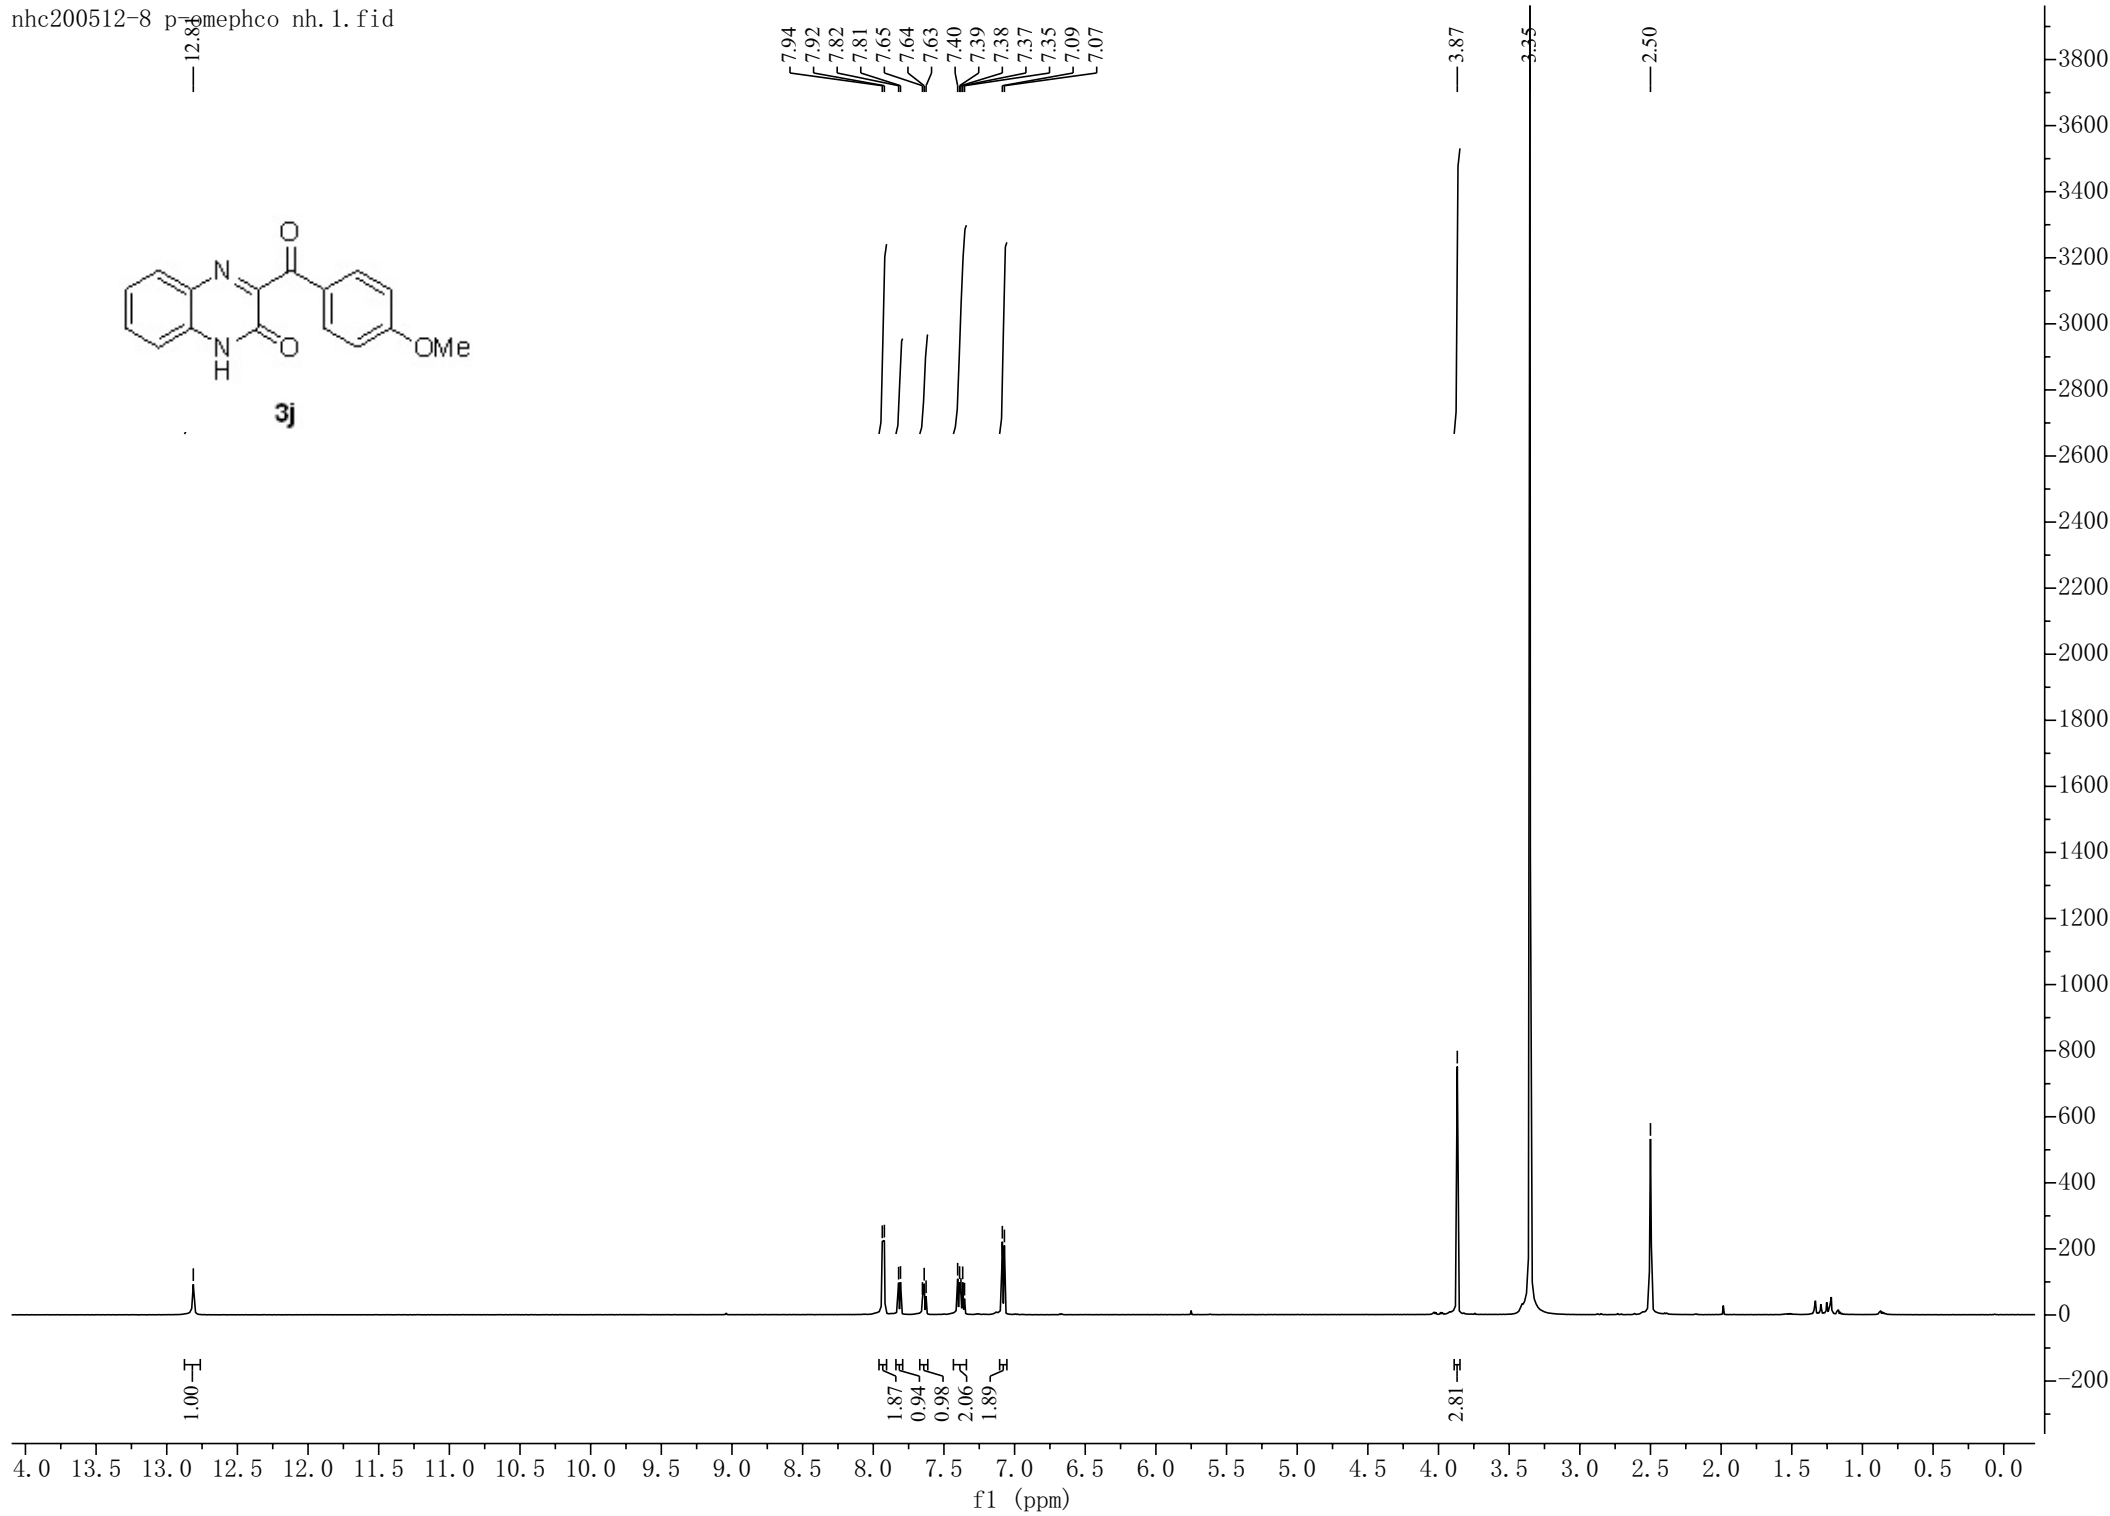

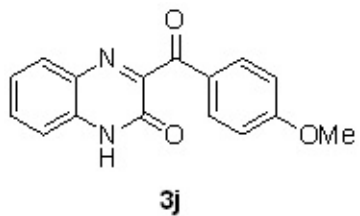

— 190.75

— 164.27

— 156.65

— 153.39

— 132.63

— 132.19

— 131.55

— 131.21

— 55.74

39.93 DMSO  
39.80 DMSO  
39.66 DMSO  
39.52 DMSO  
39.38 DMSO  
39.24 DMSO  
39.10 DMSO

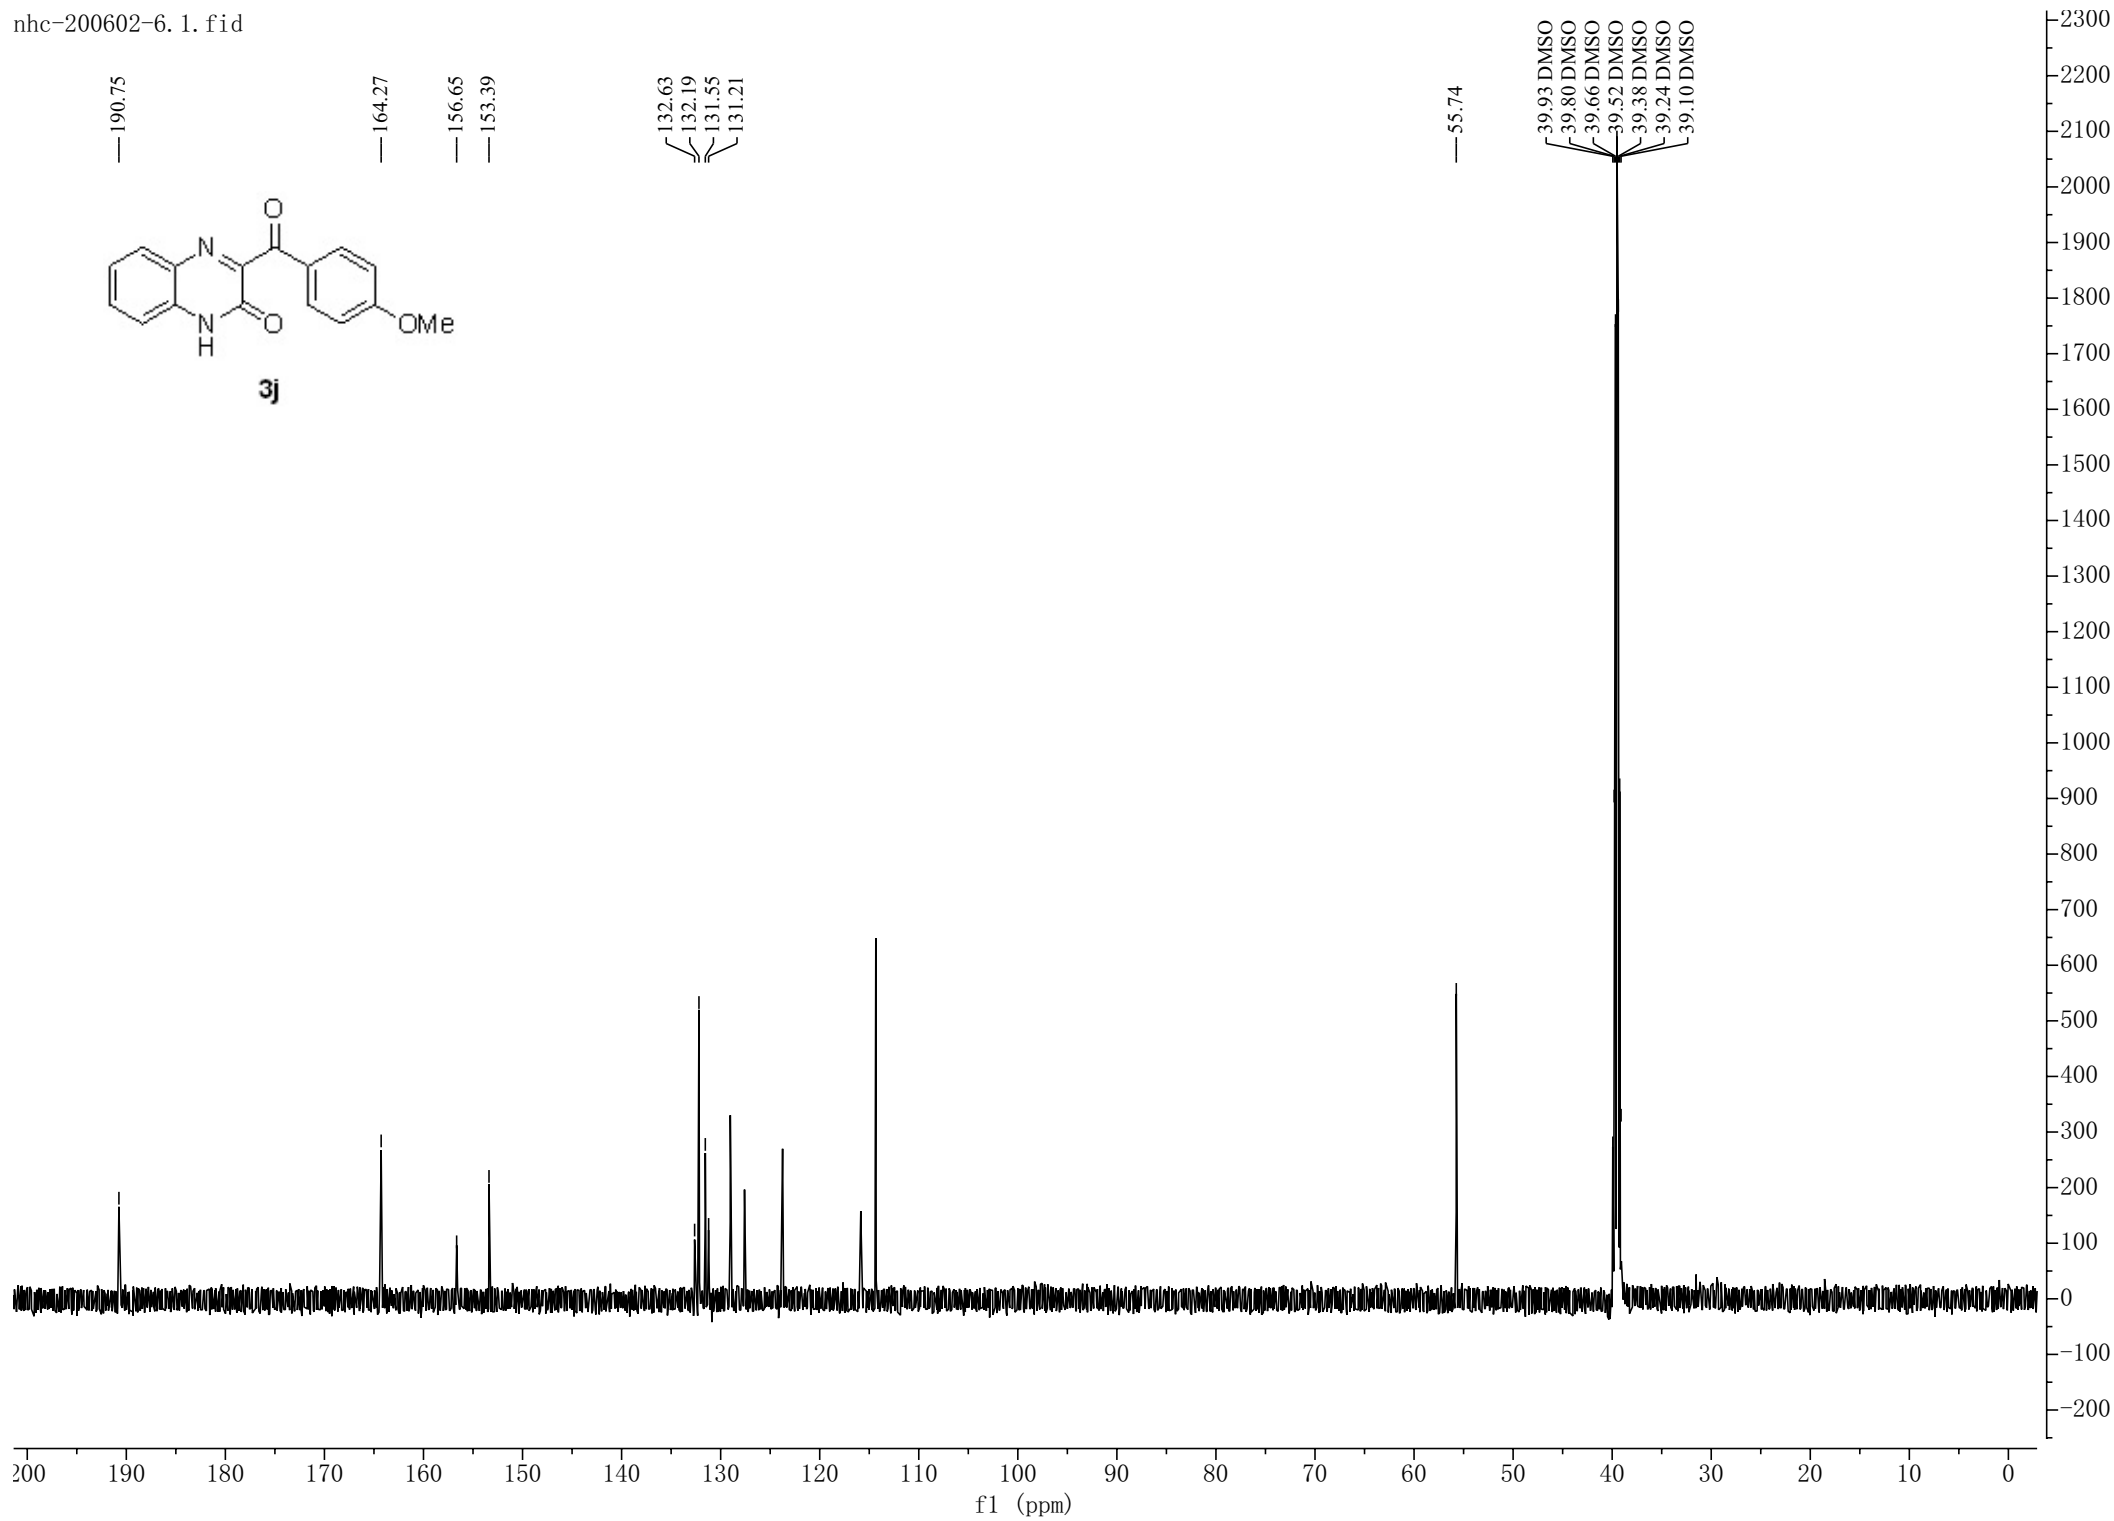

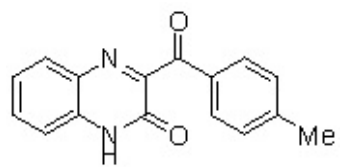

**3k**

12.8

7.86  
7.85  
7.83  
7.81  
7.66  
7.65  
7.63  
7.41  
7.39  
7.38  
7.37  
7.36

3.34

2.50  
2.50  
2.41

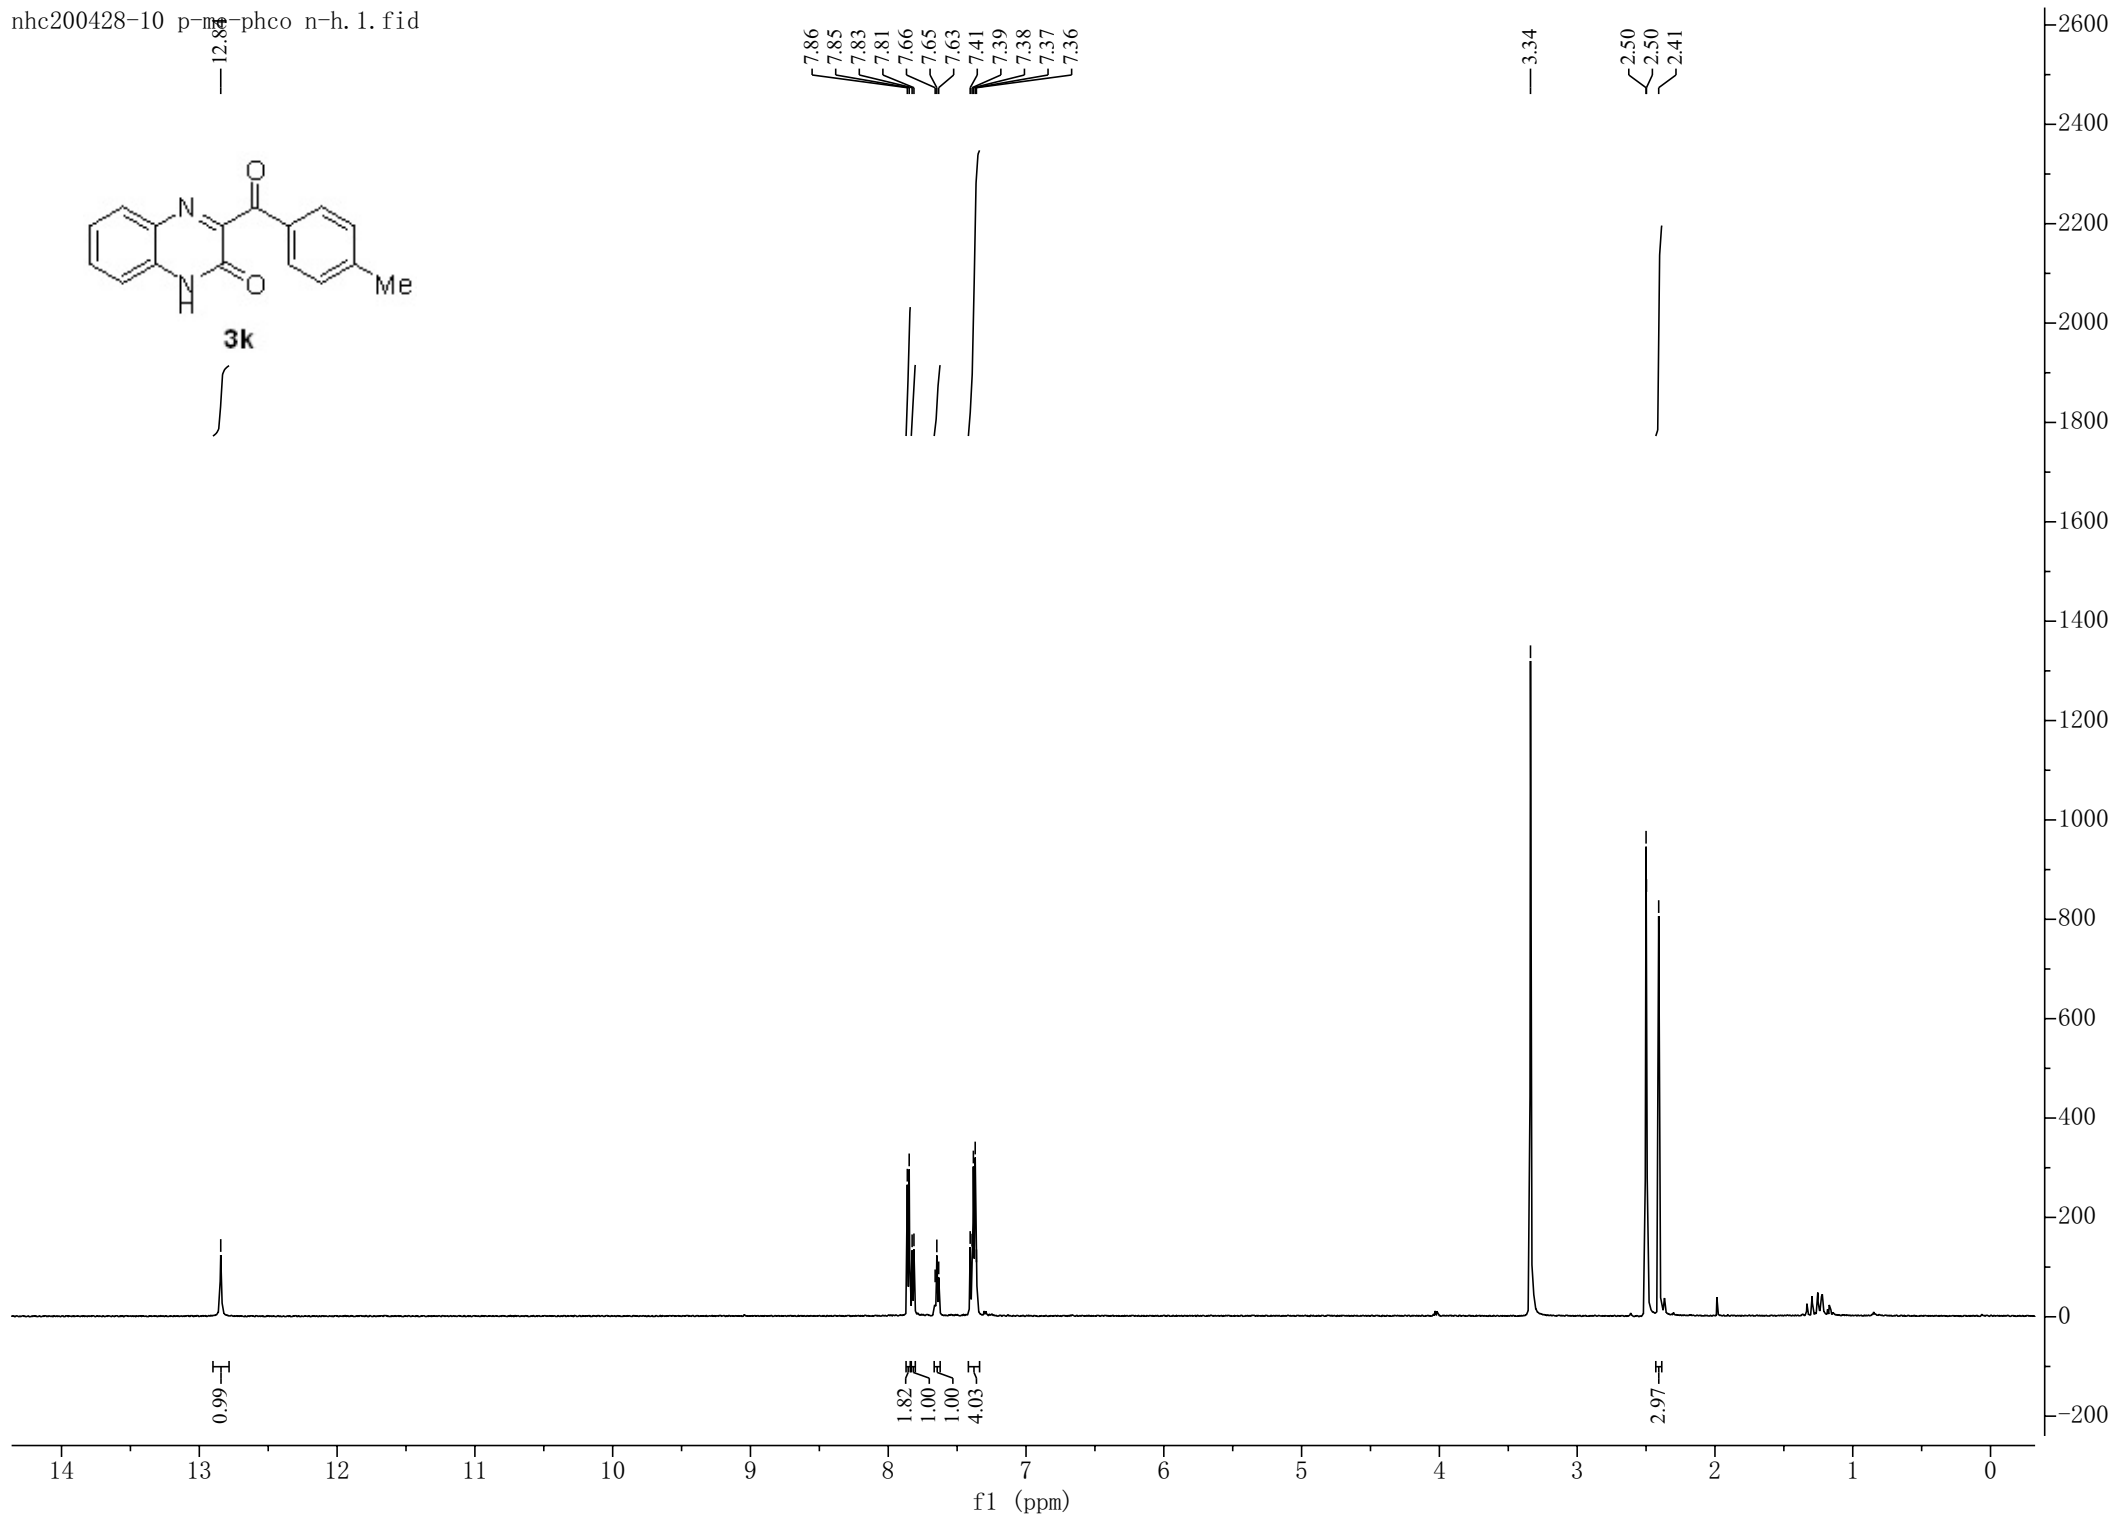

0.99

1.82  
1.00  
1.00  
4.03

2.97

f1 (ppm)

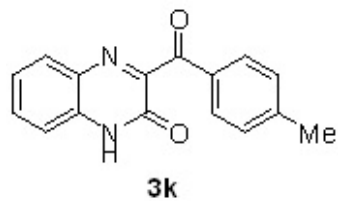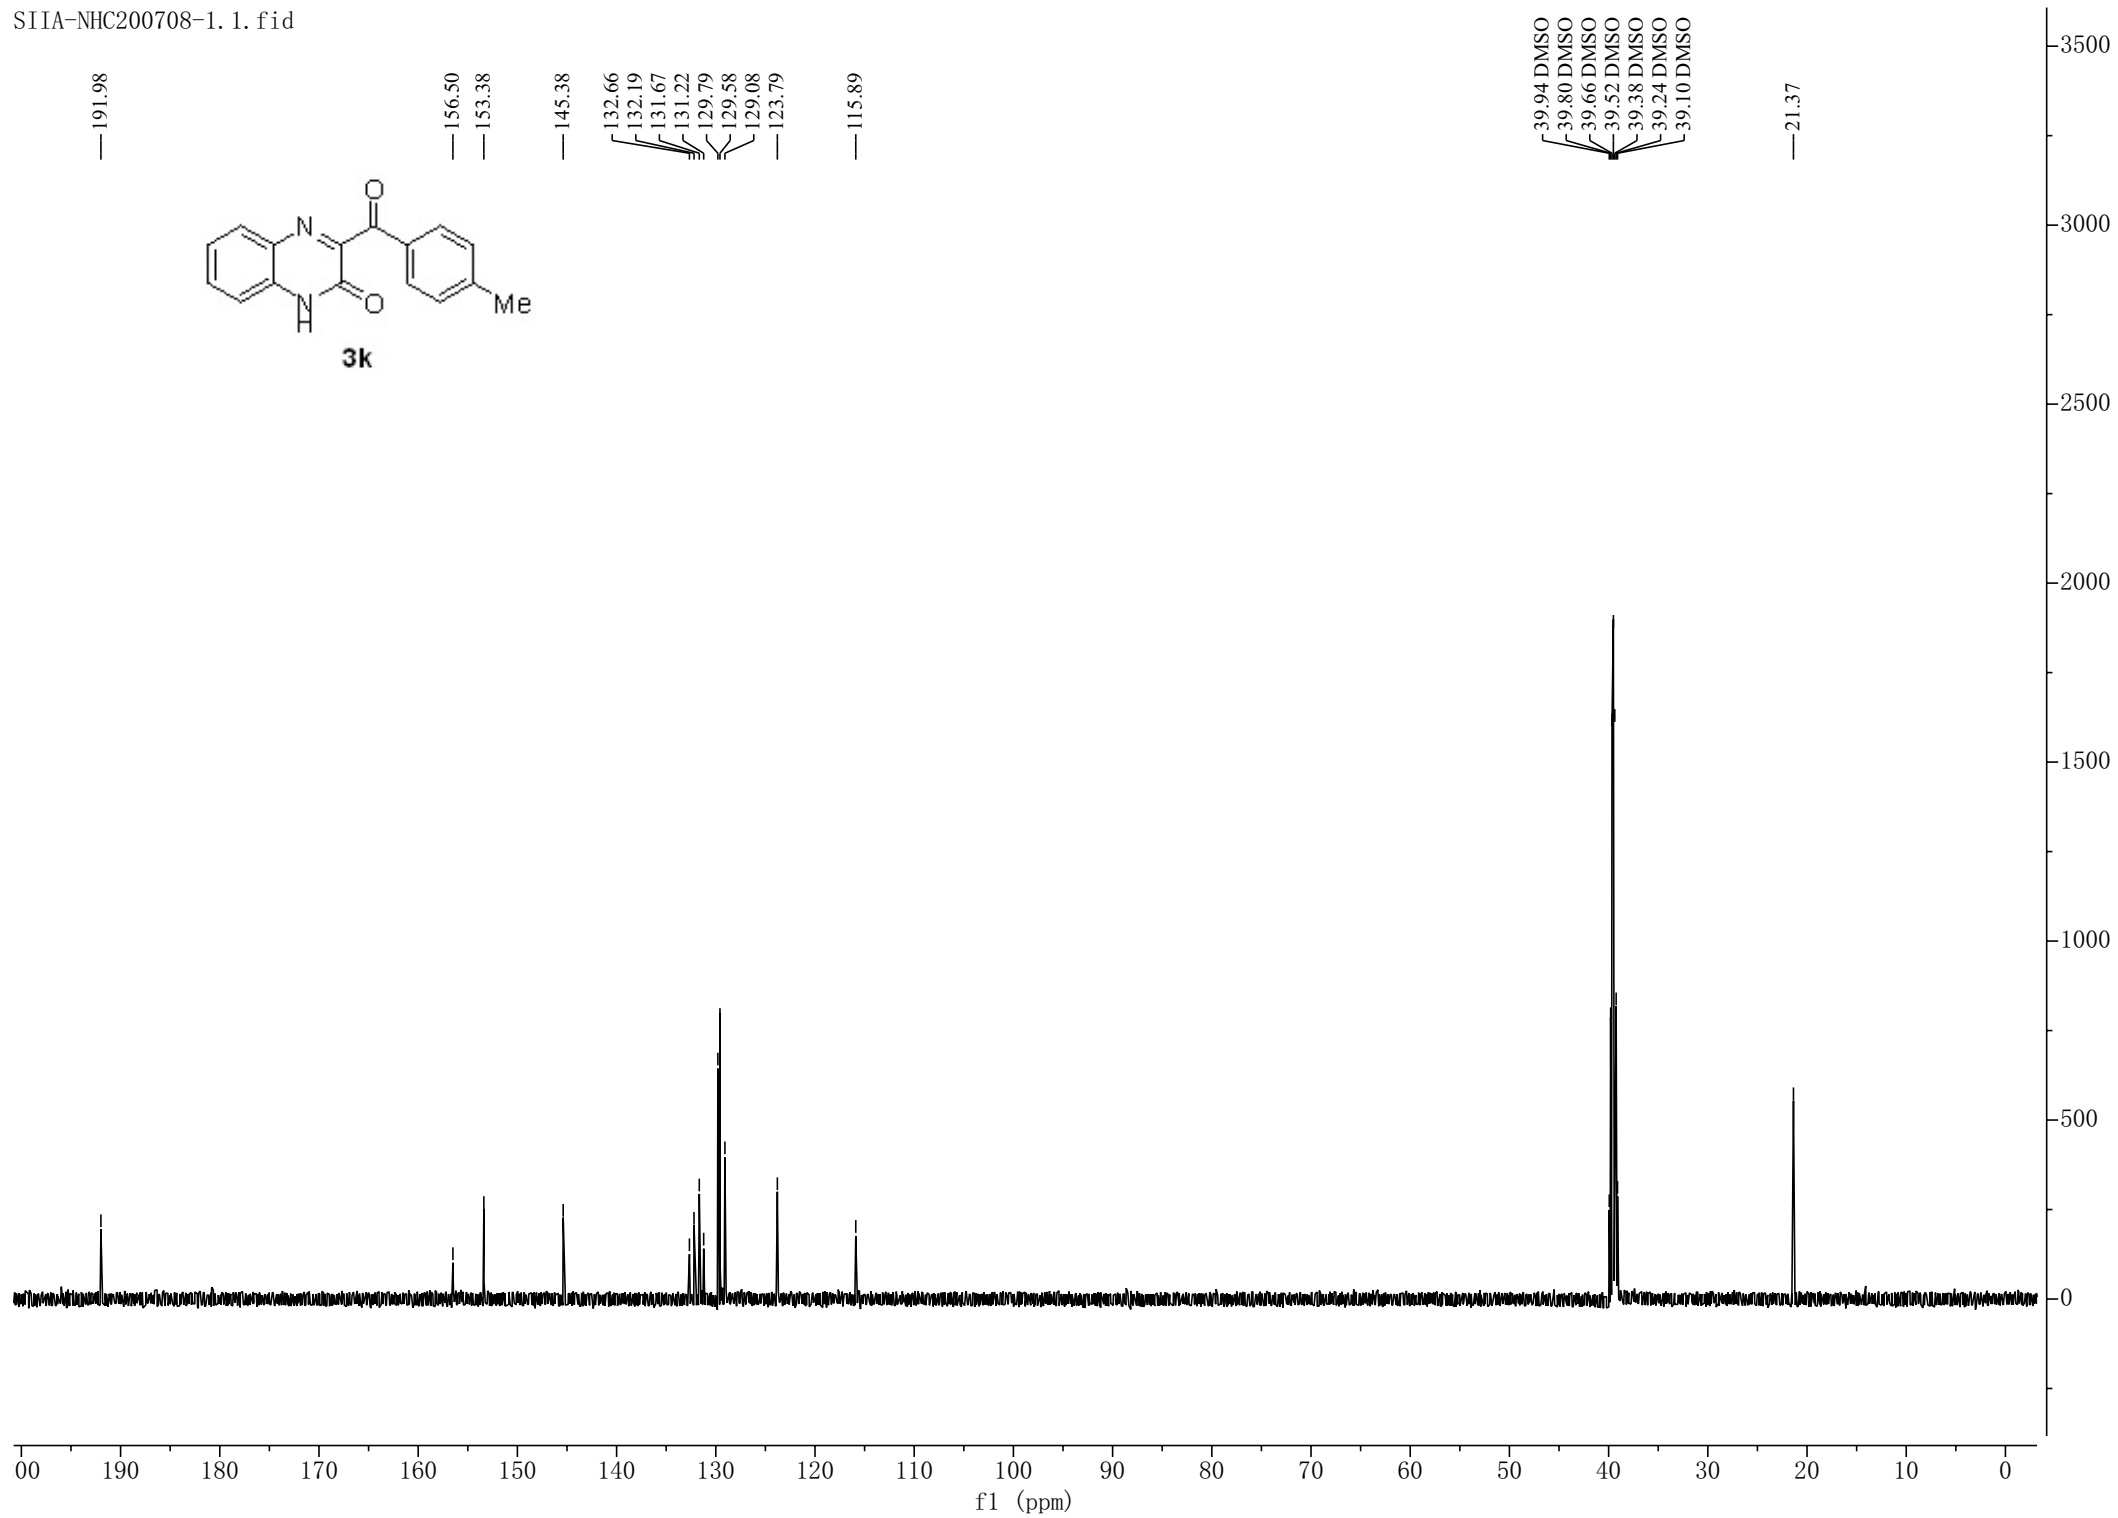

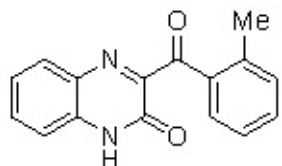

**31**

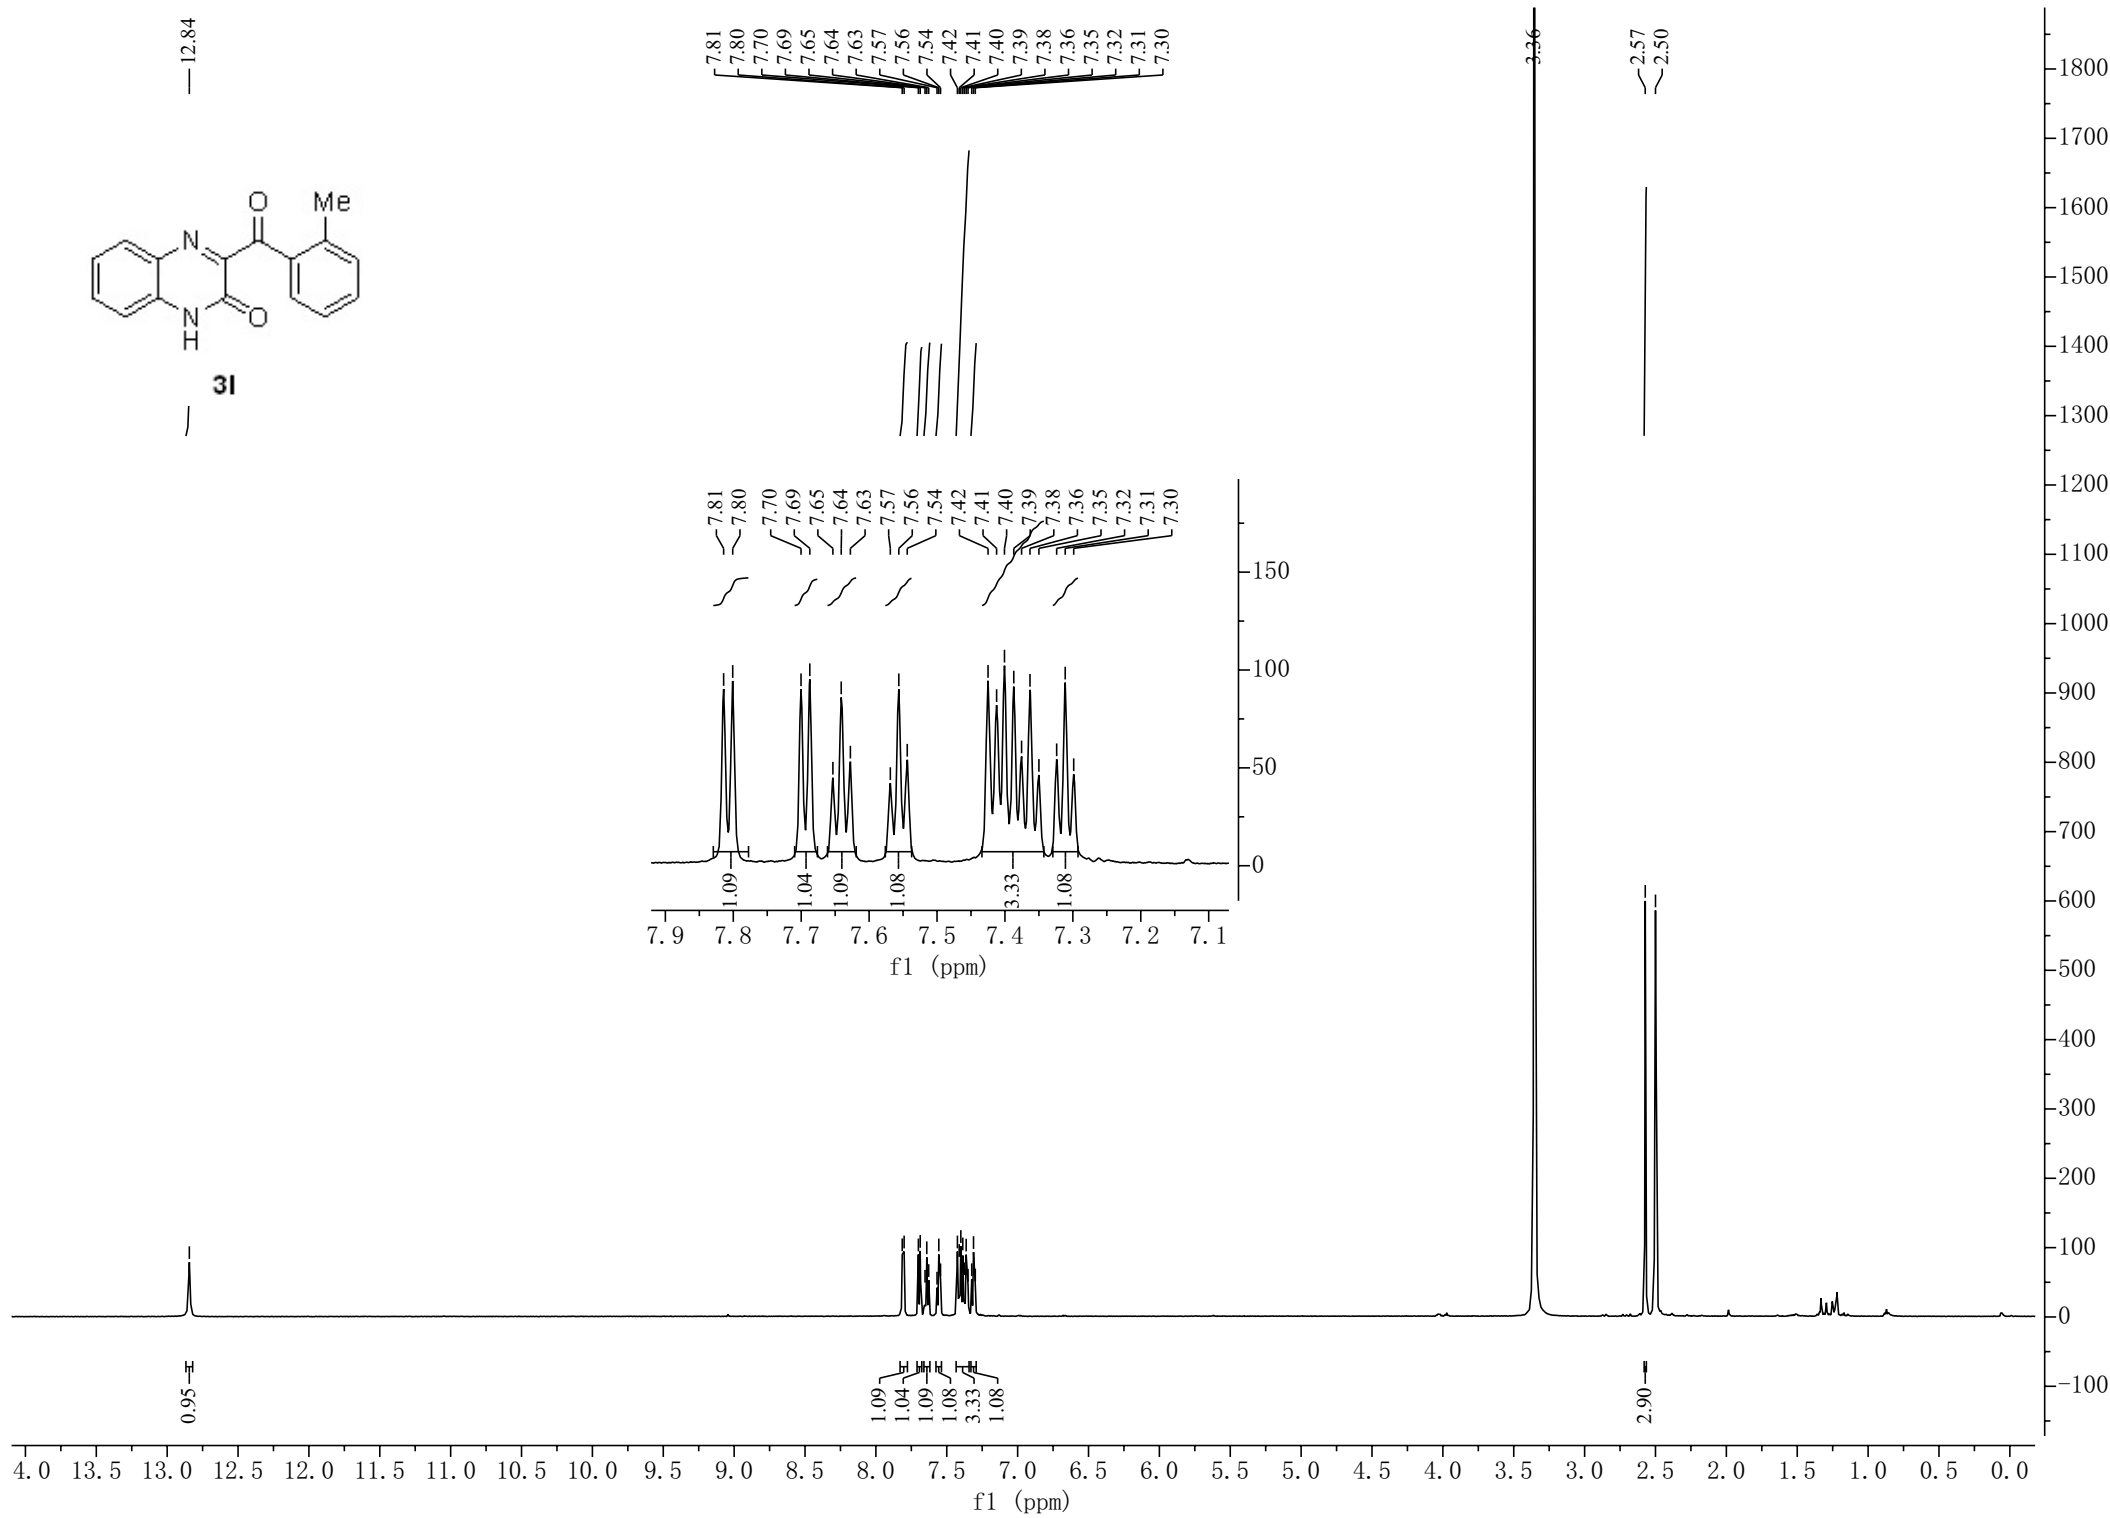

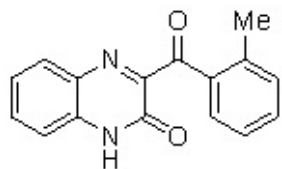

**31**

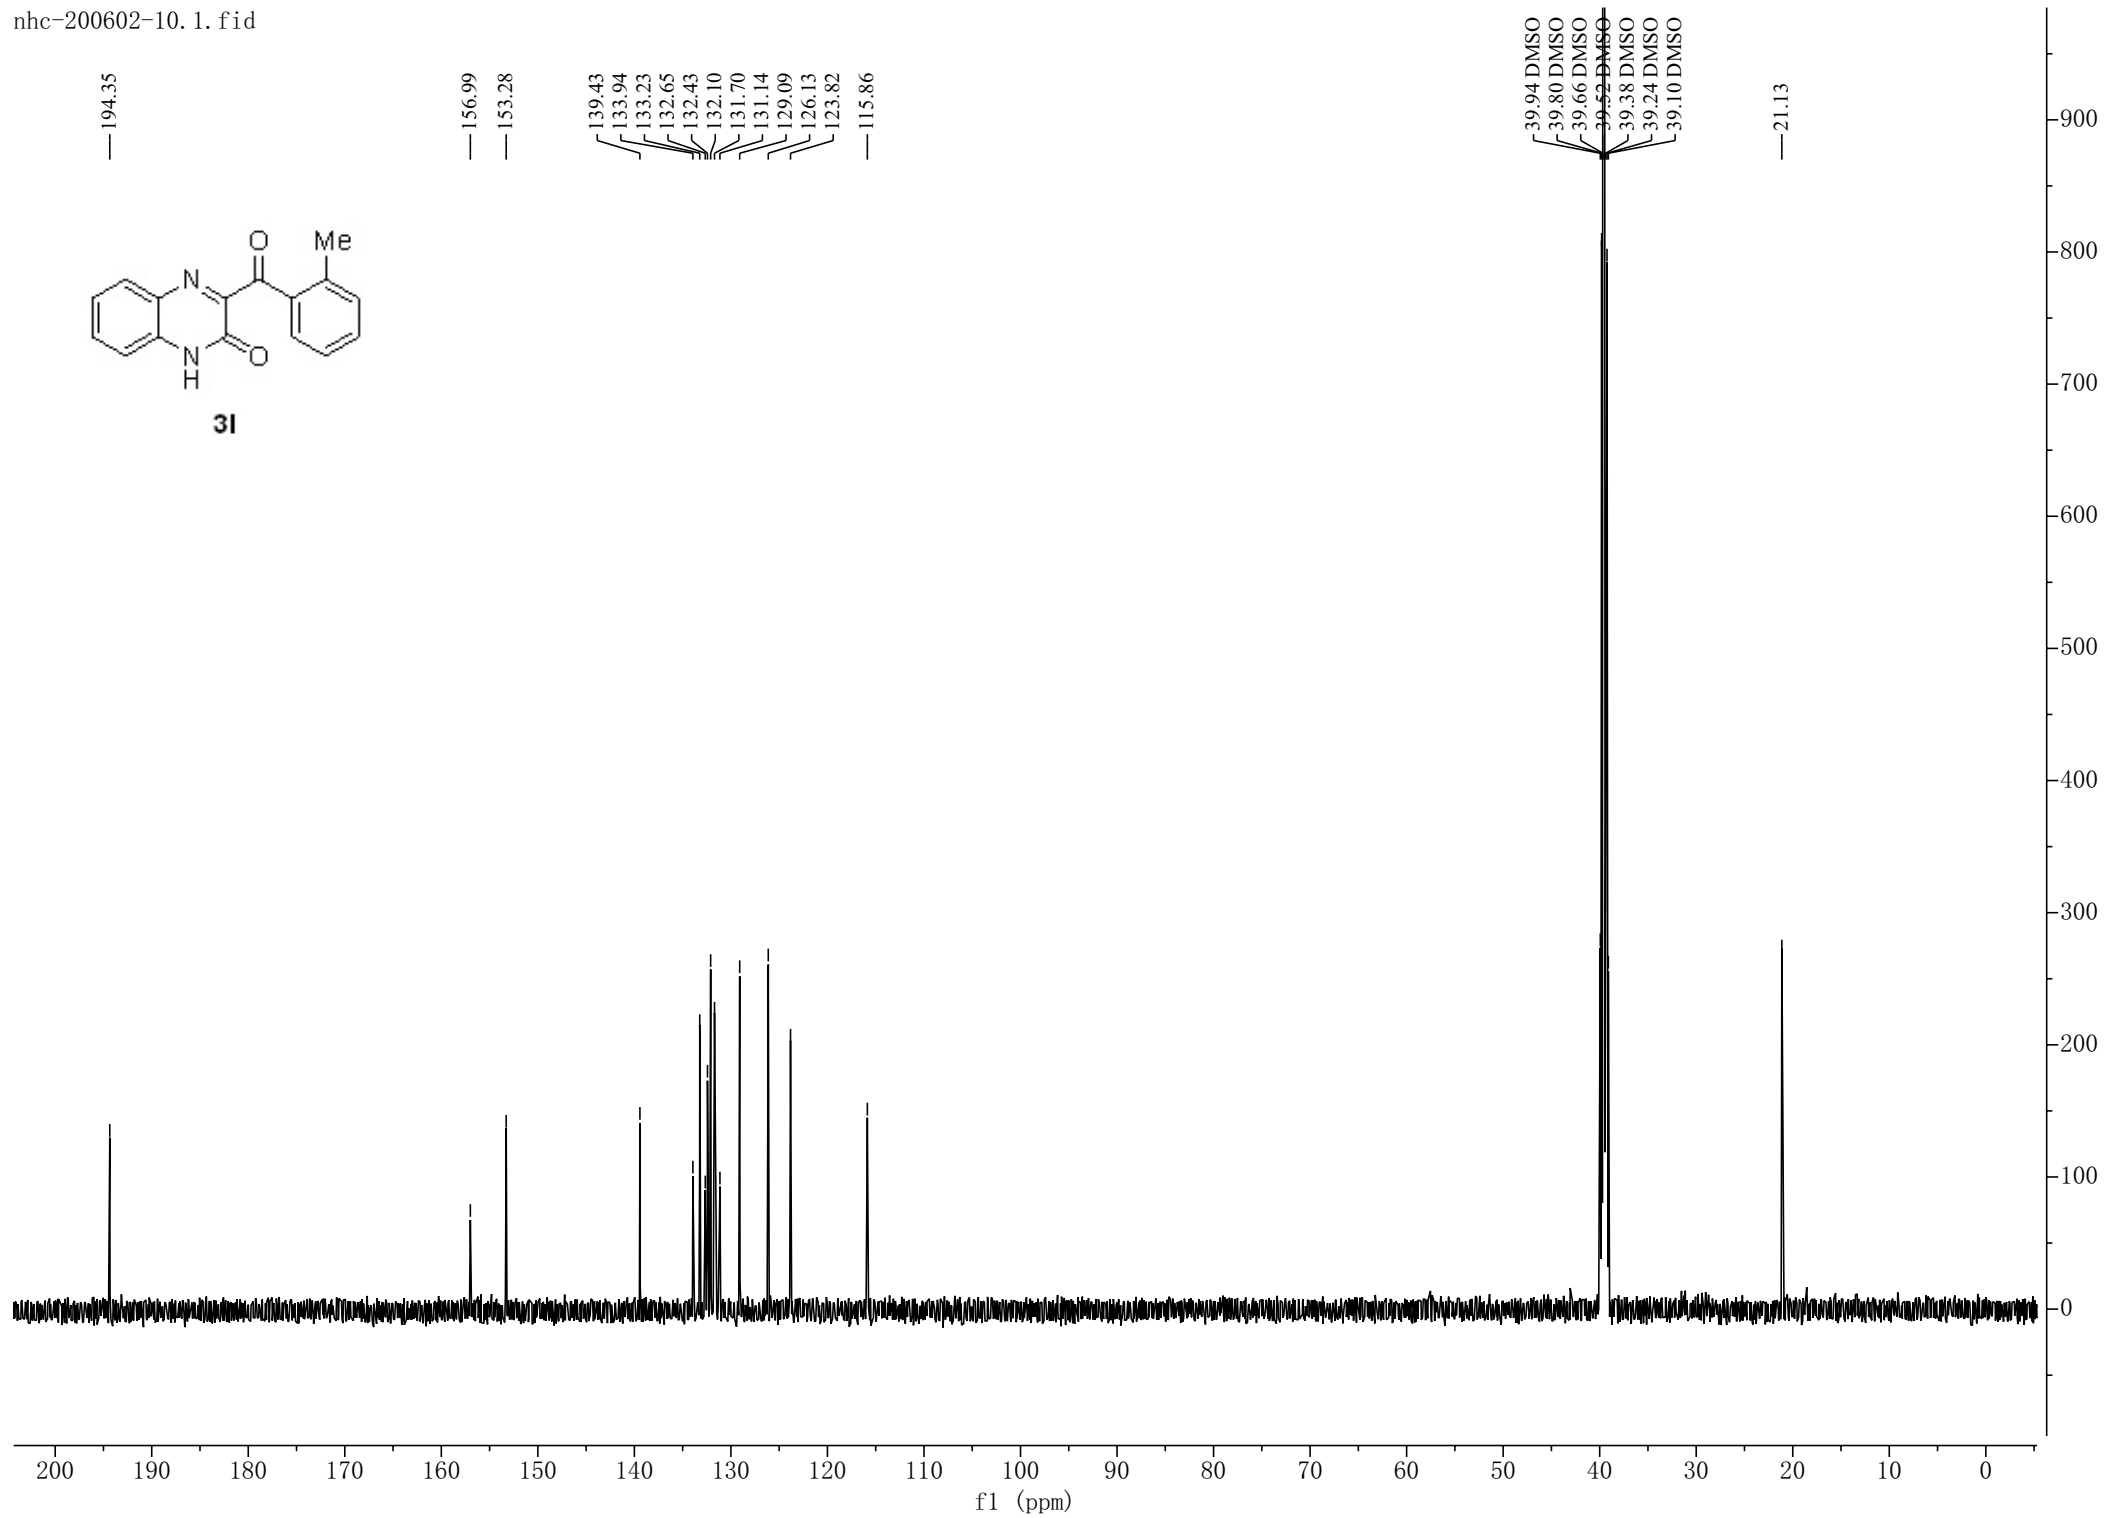



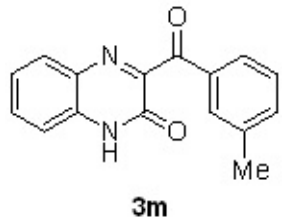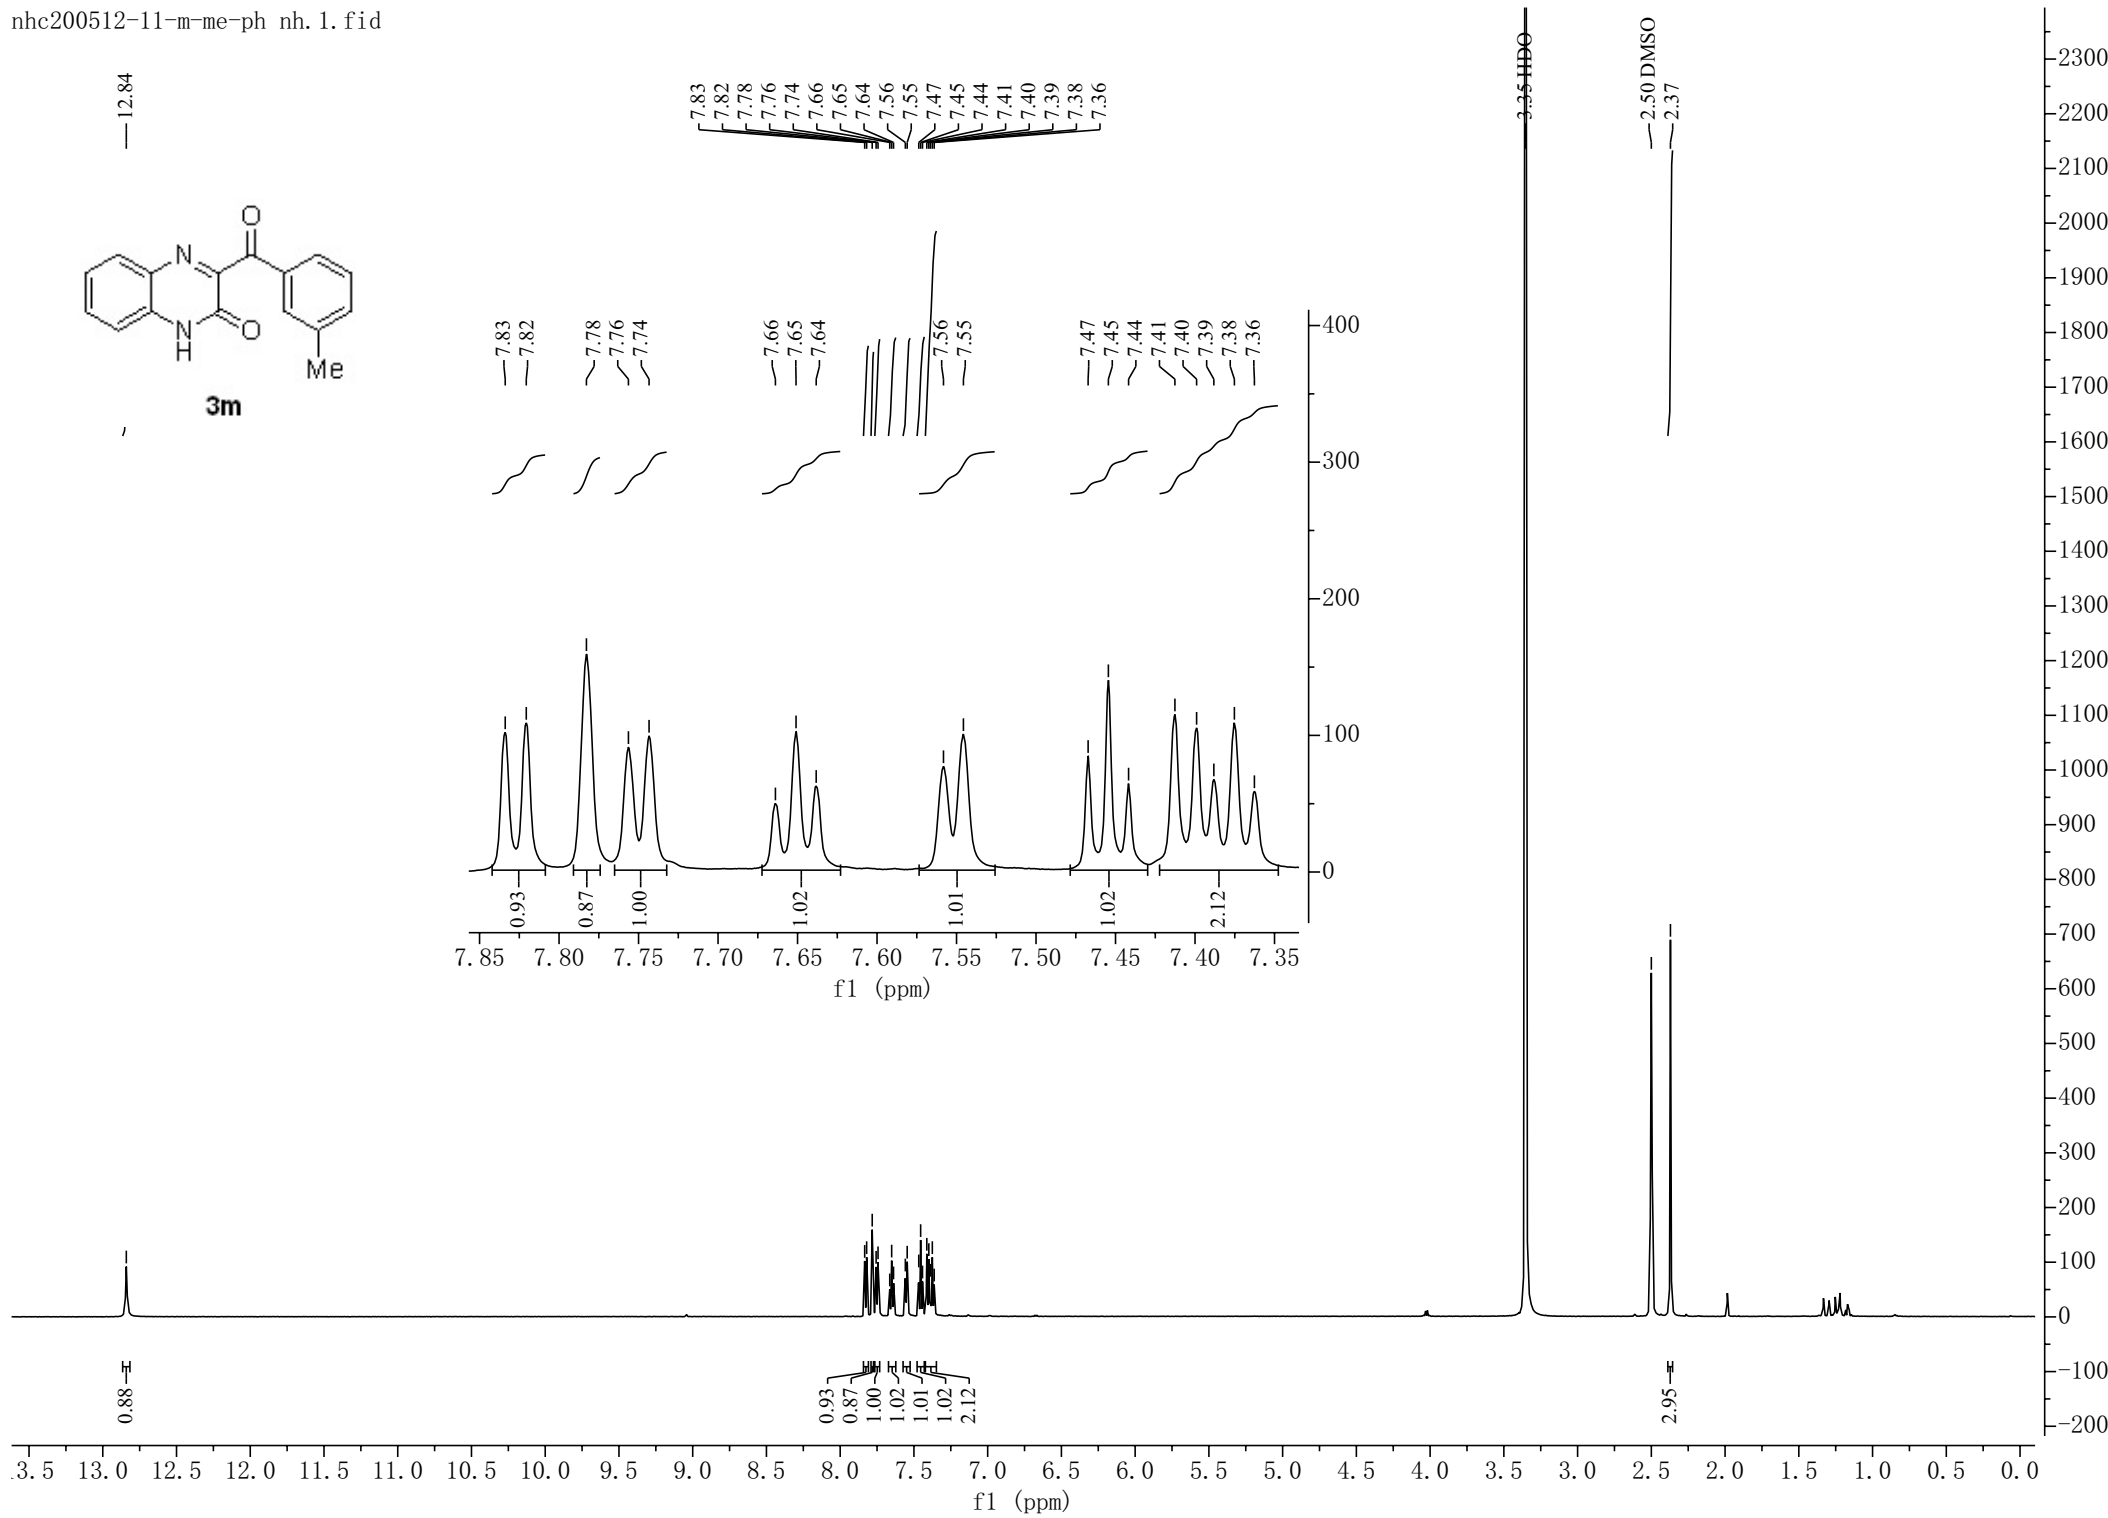

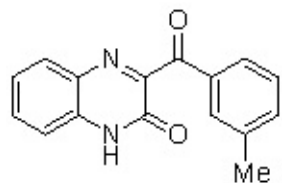

**3m**

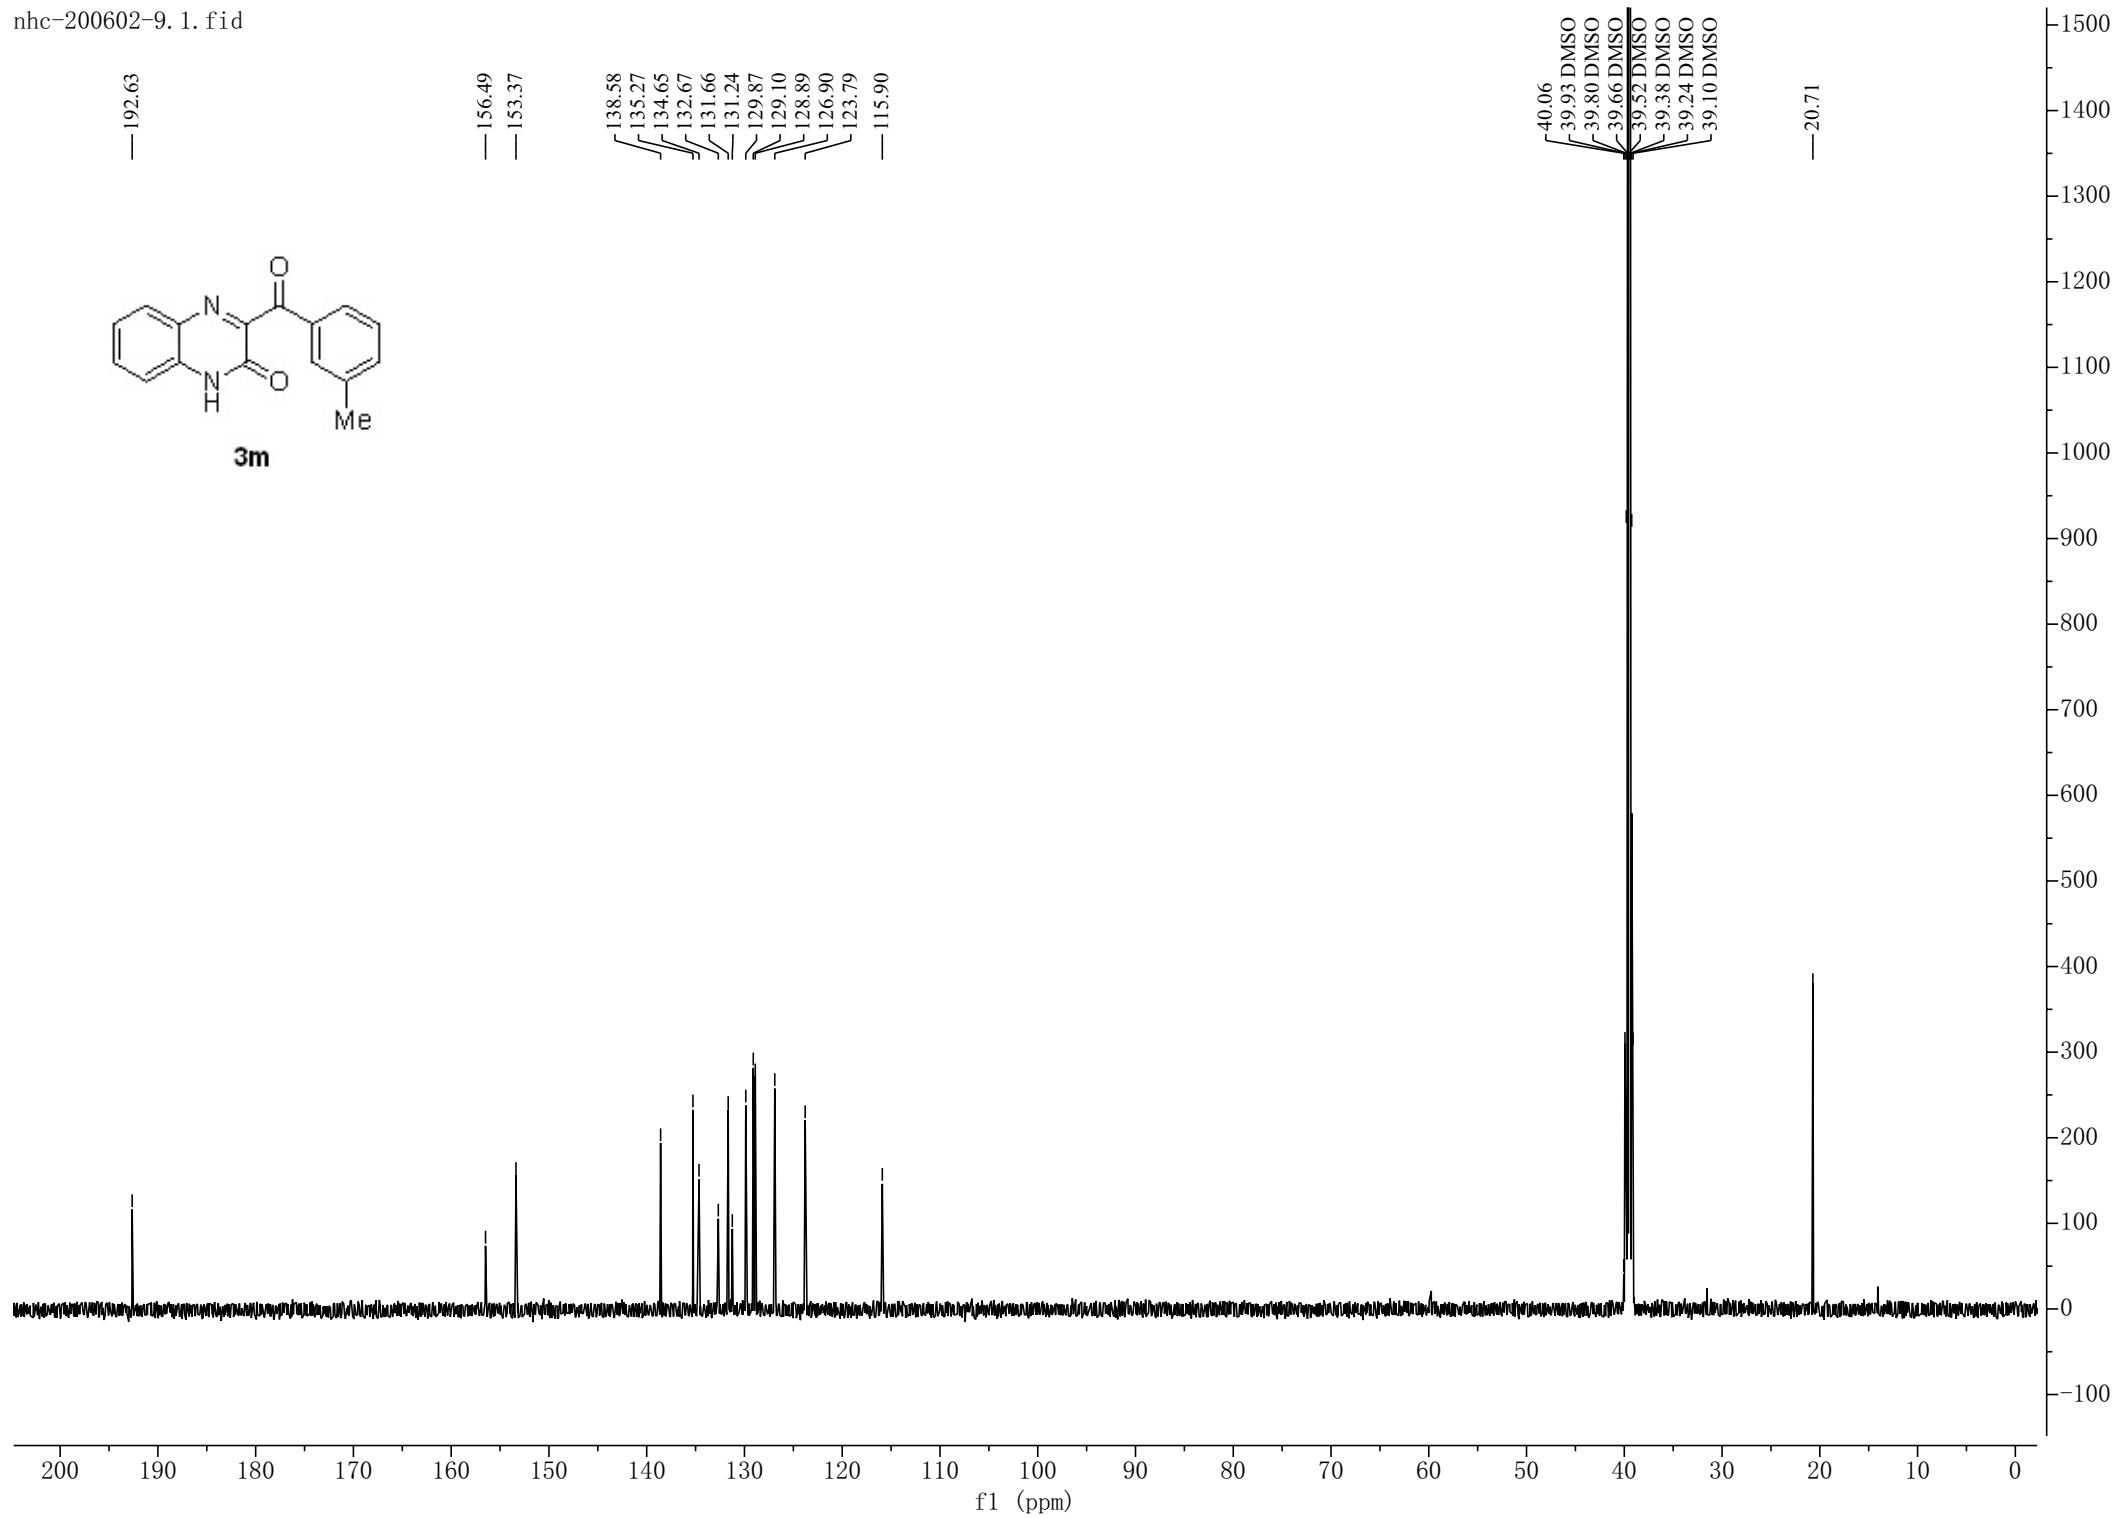

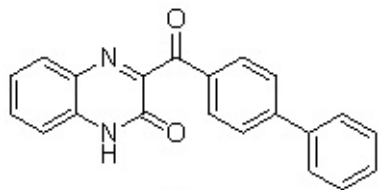

3n

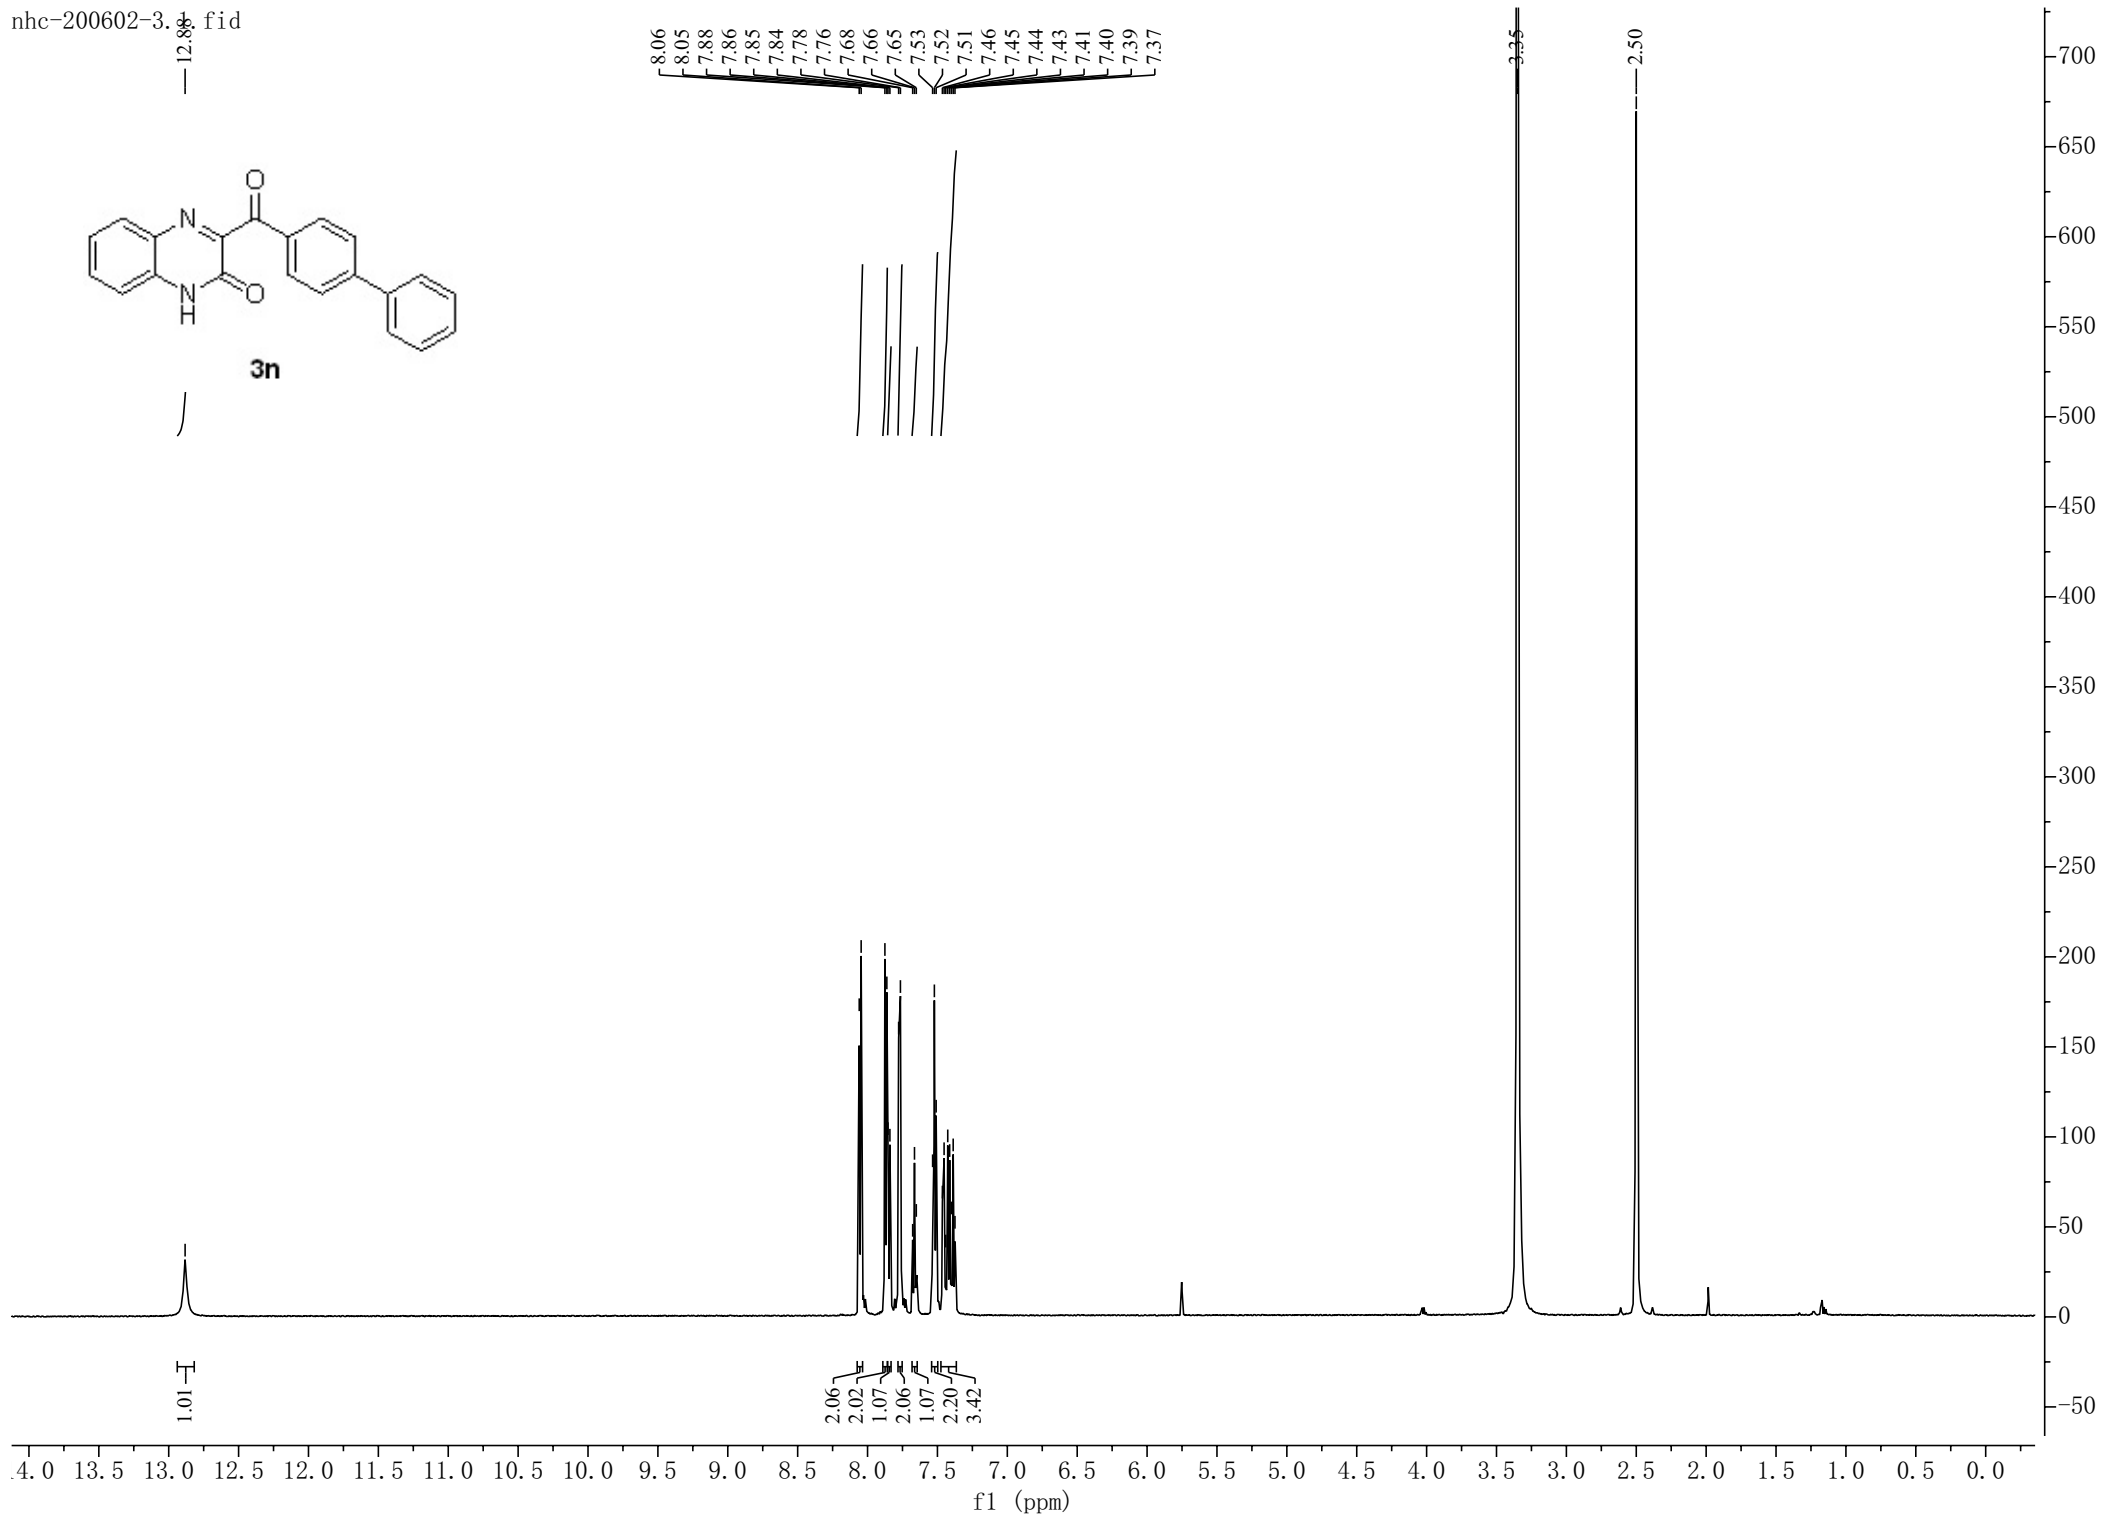

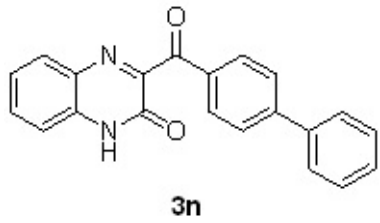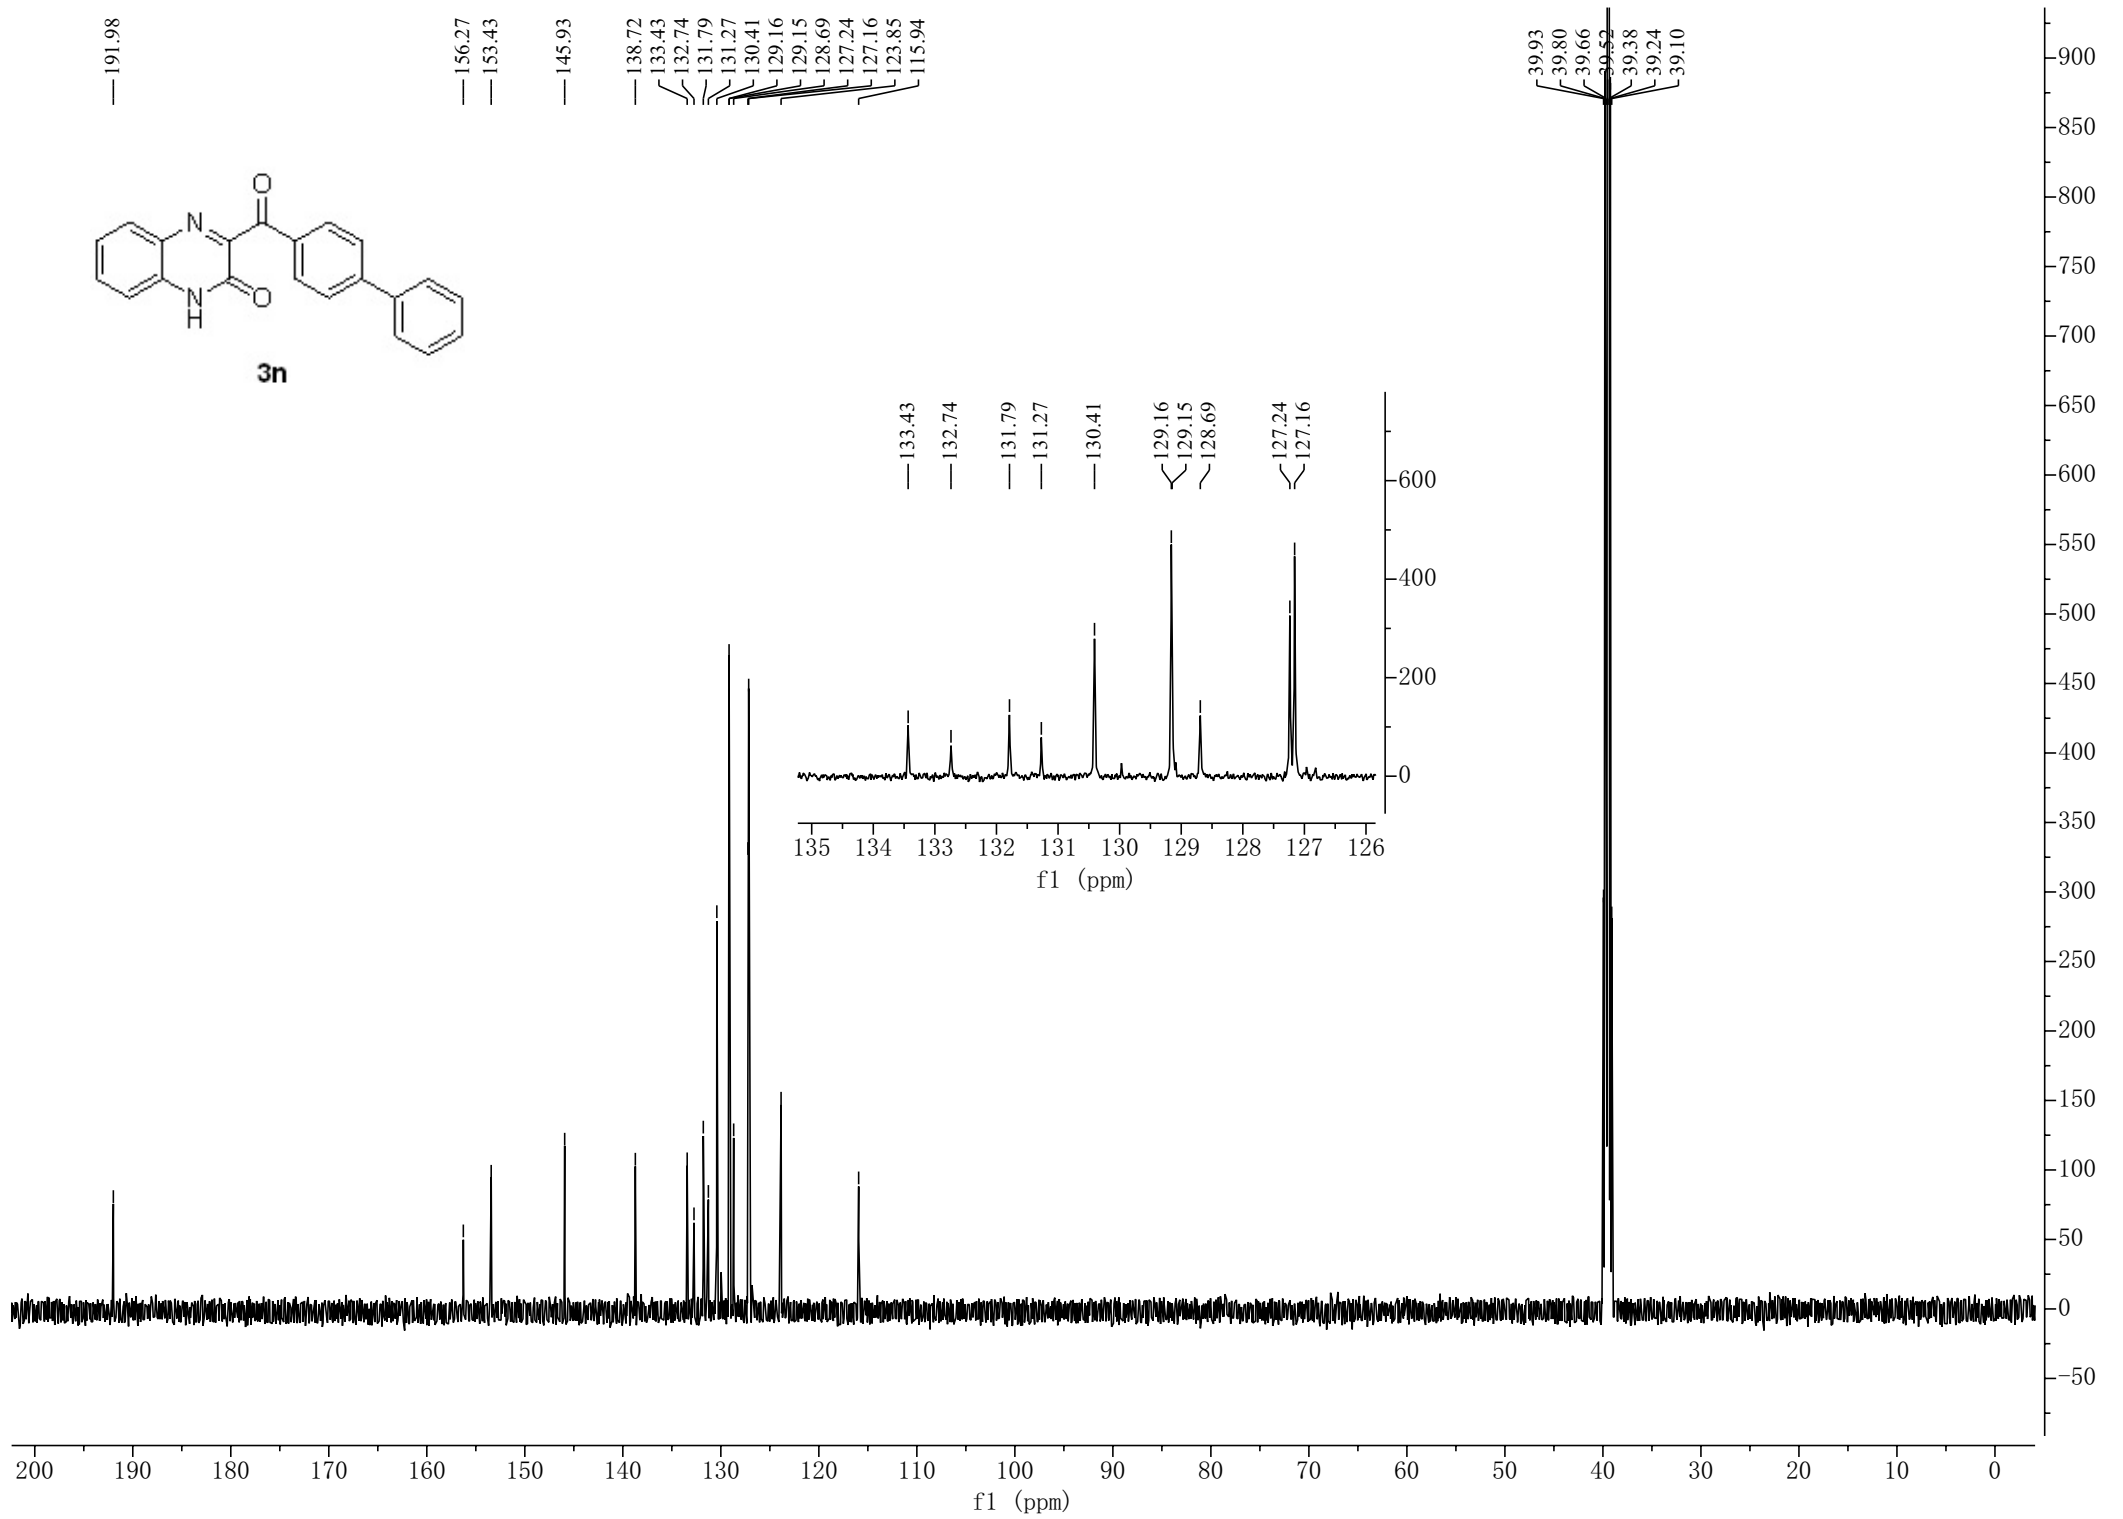

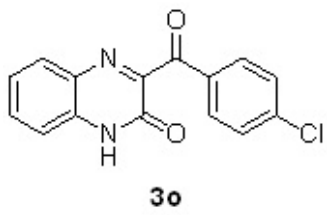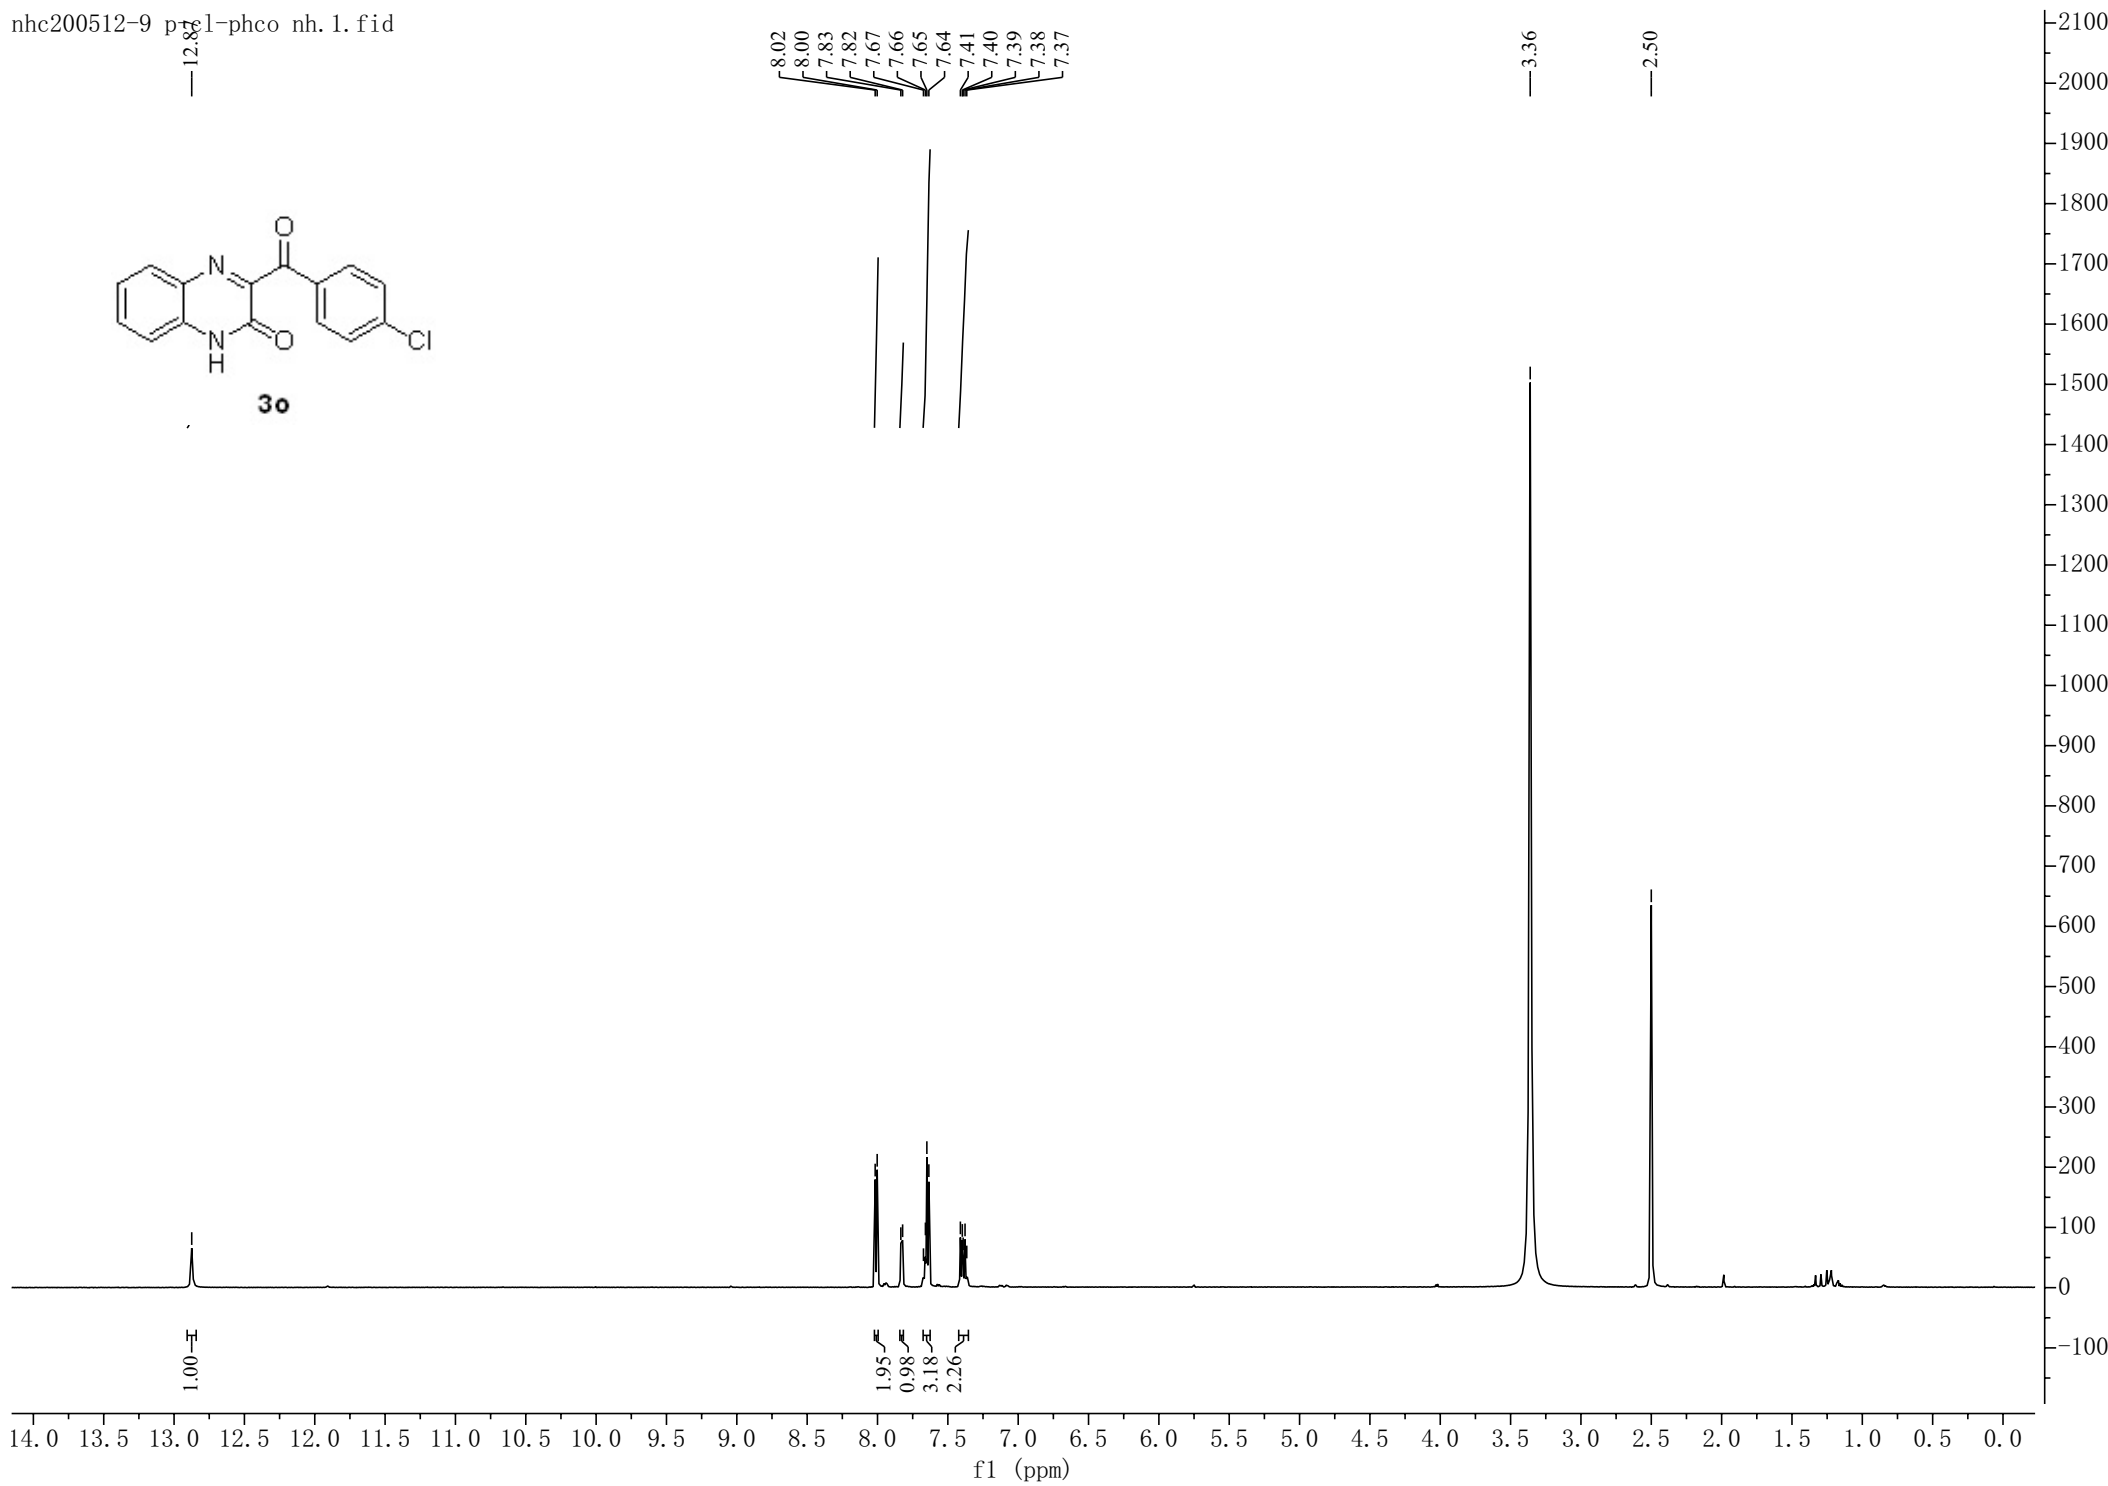

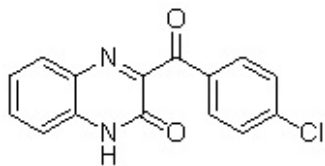

**3o**

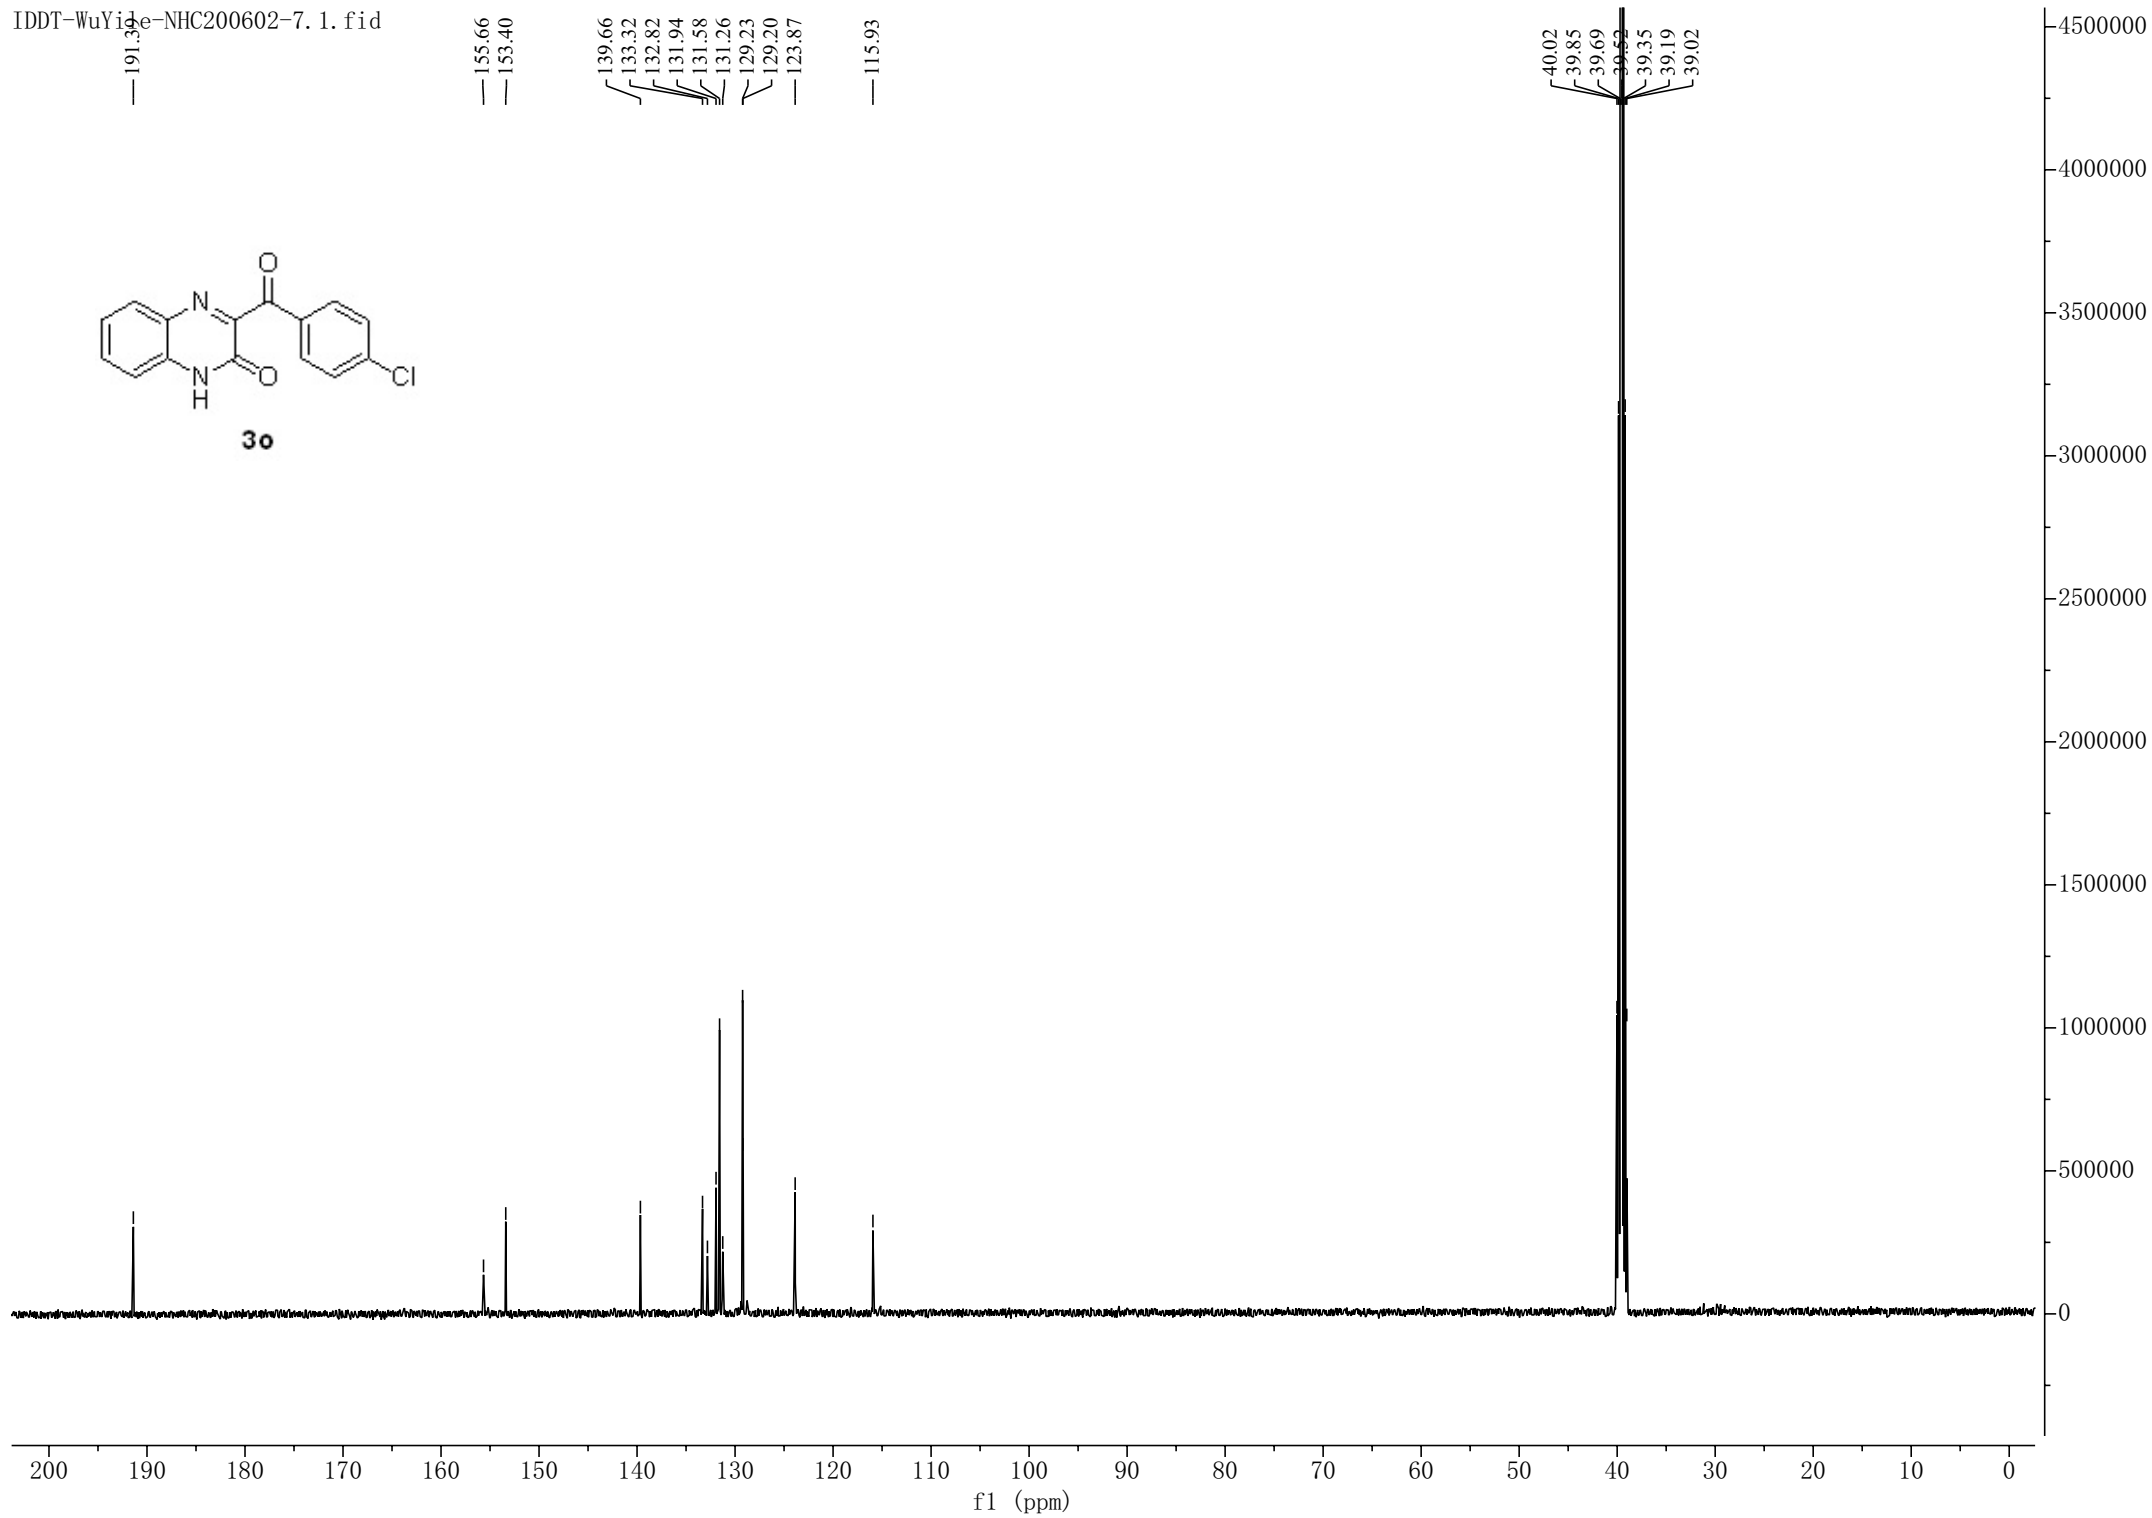

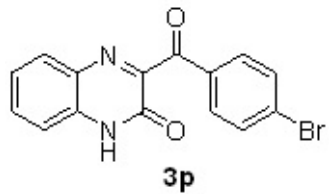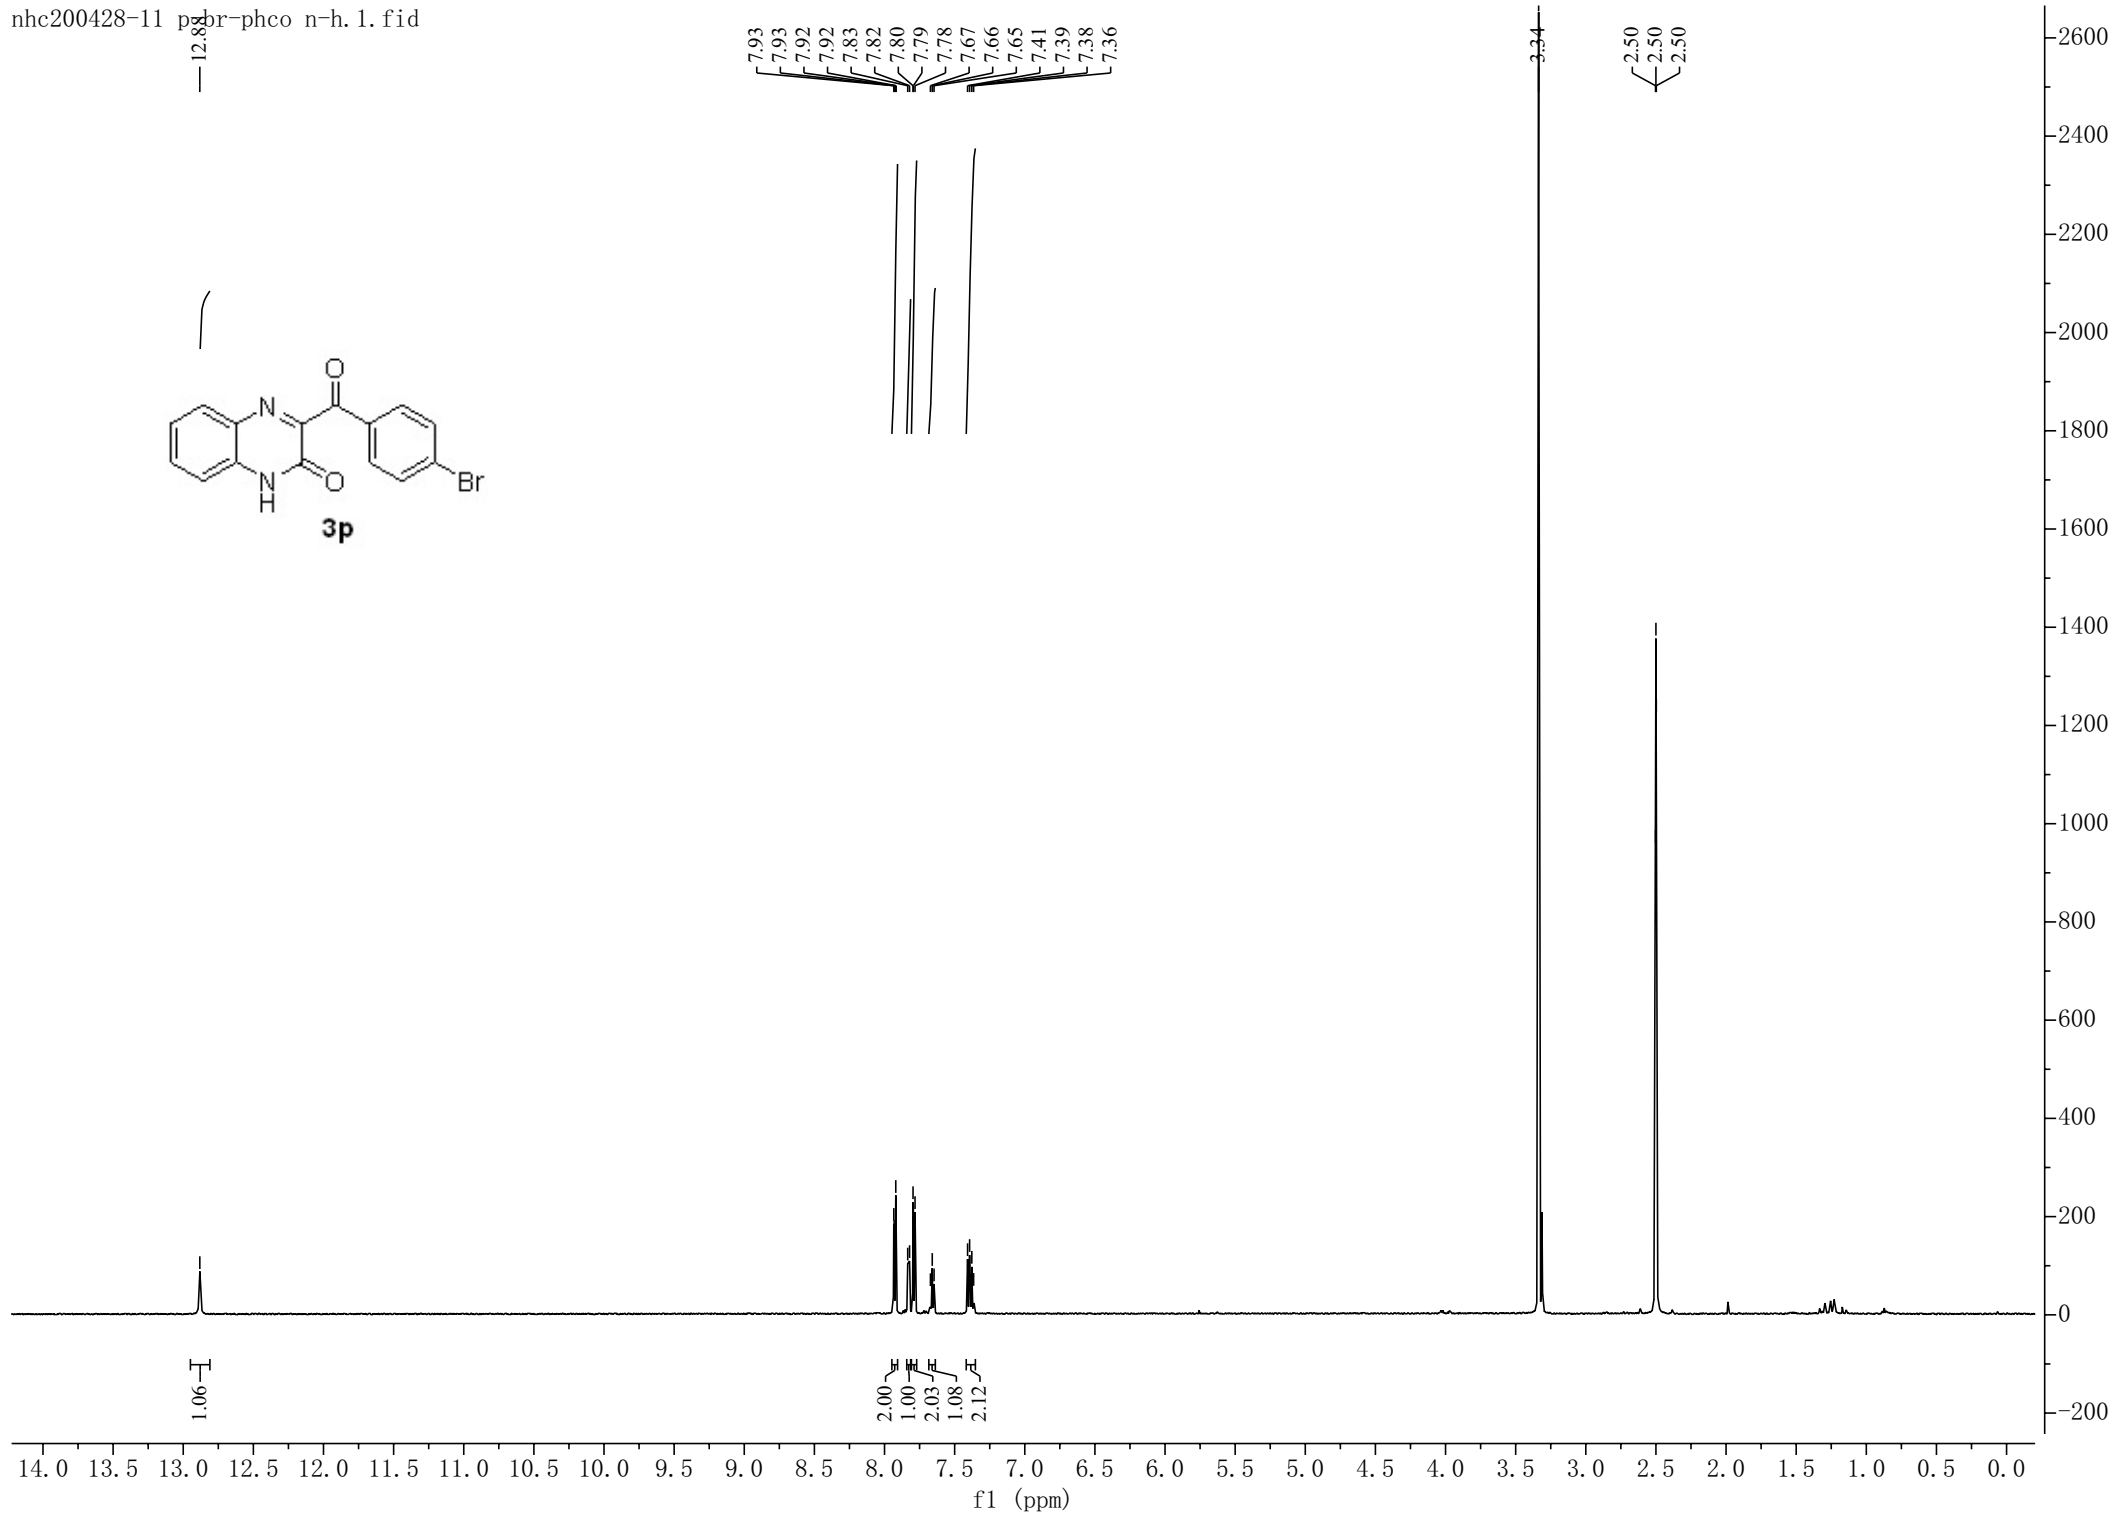

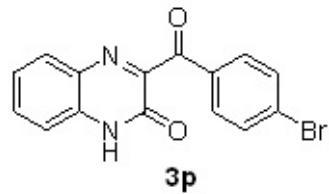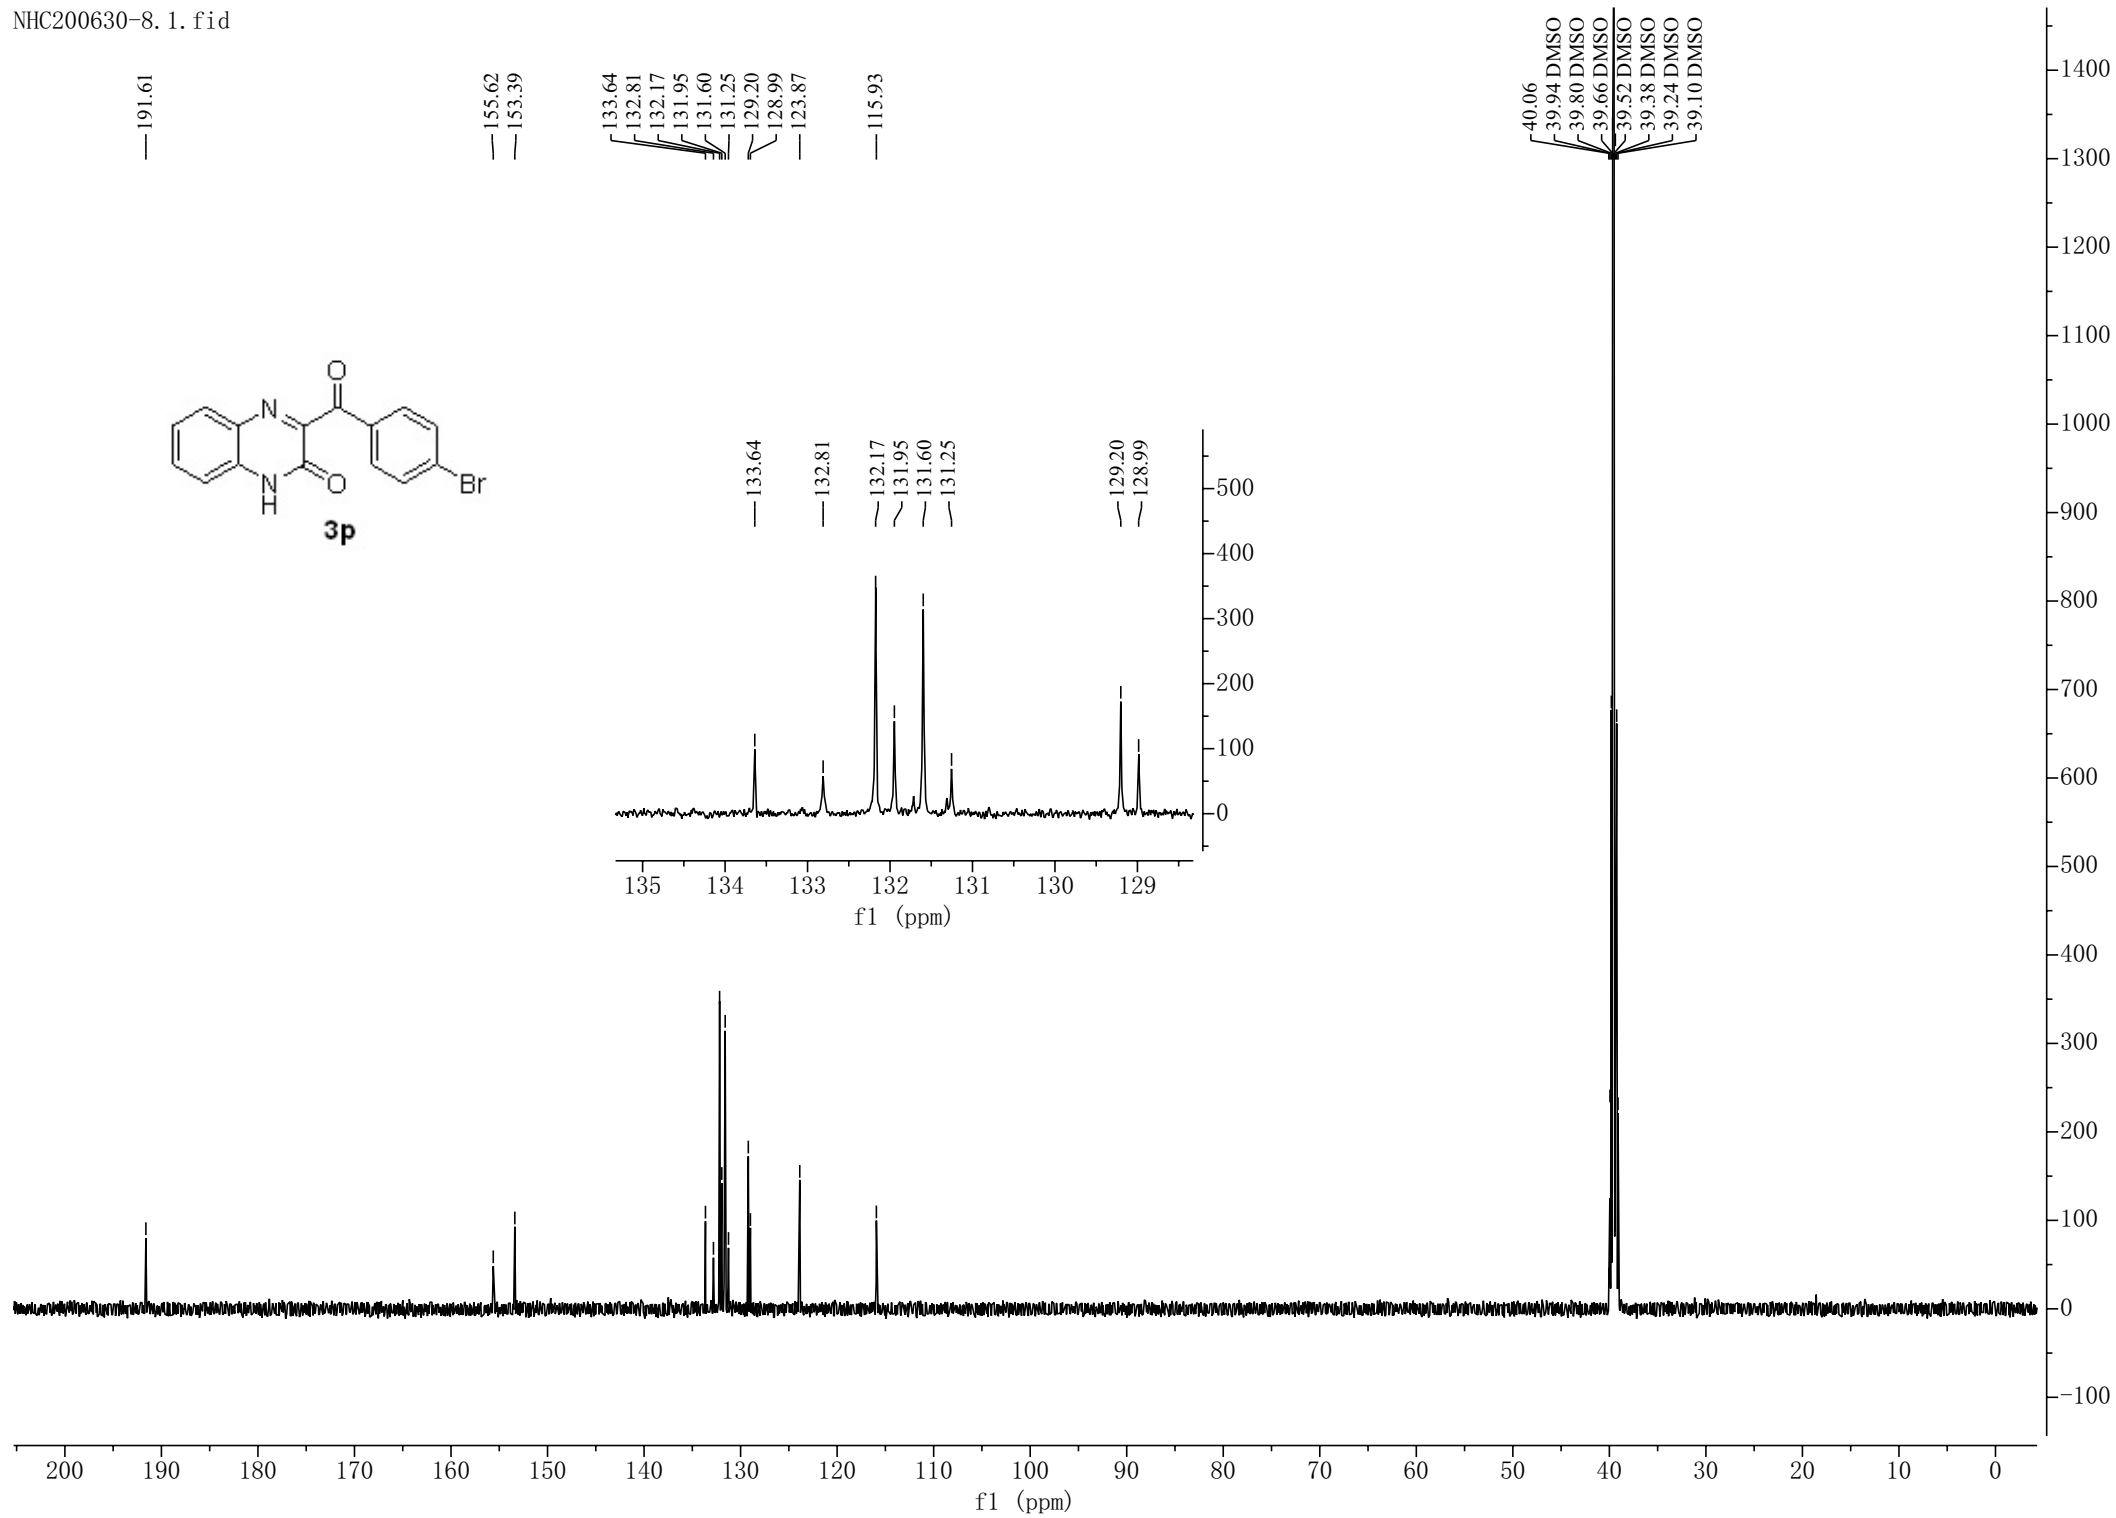



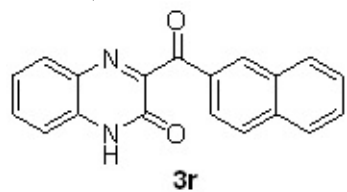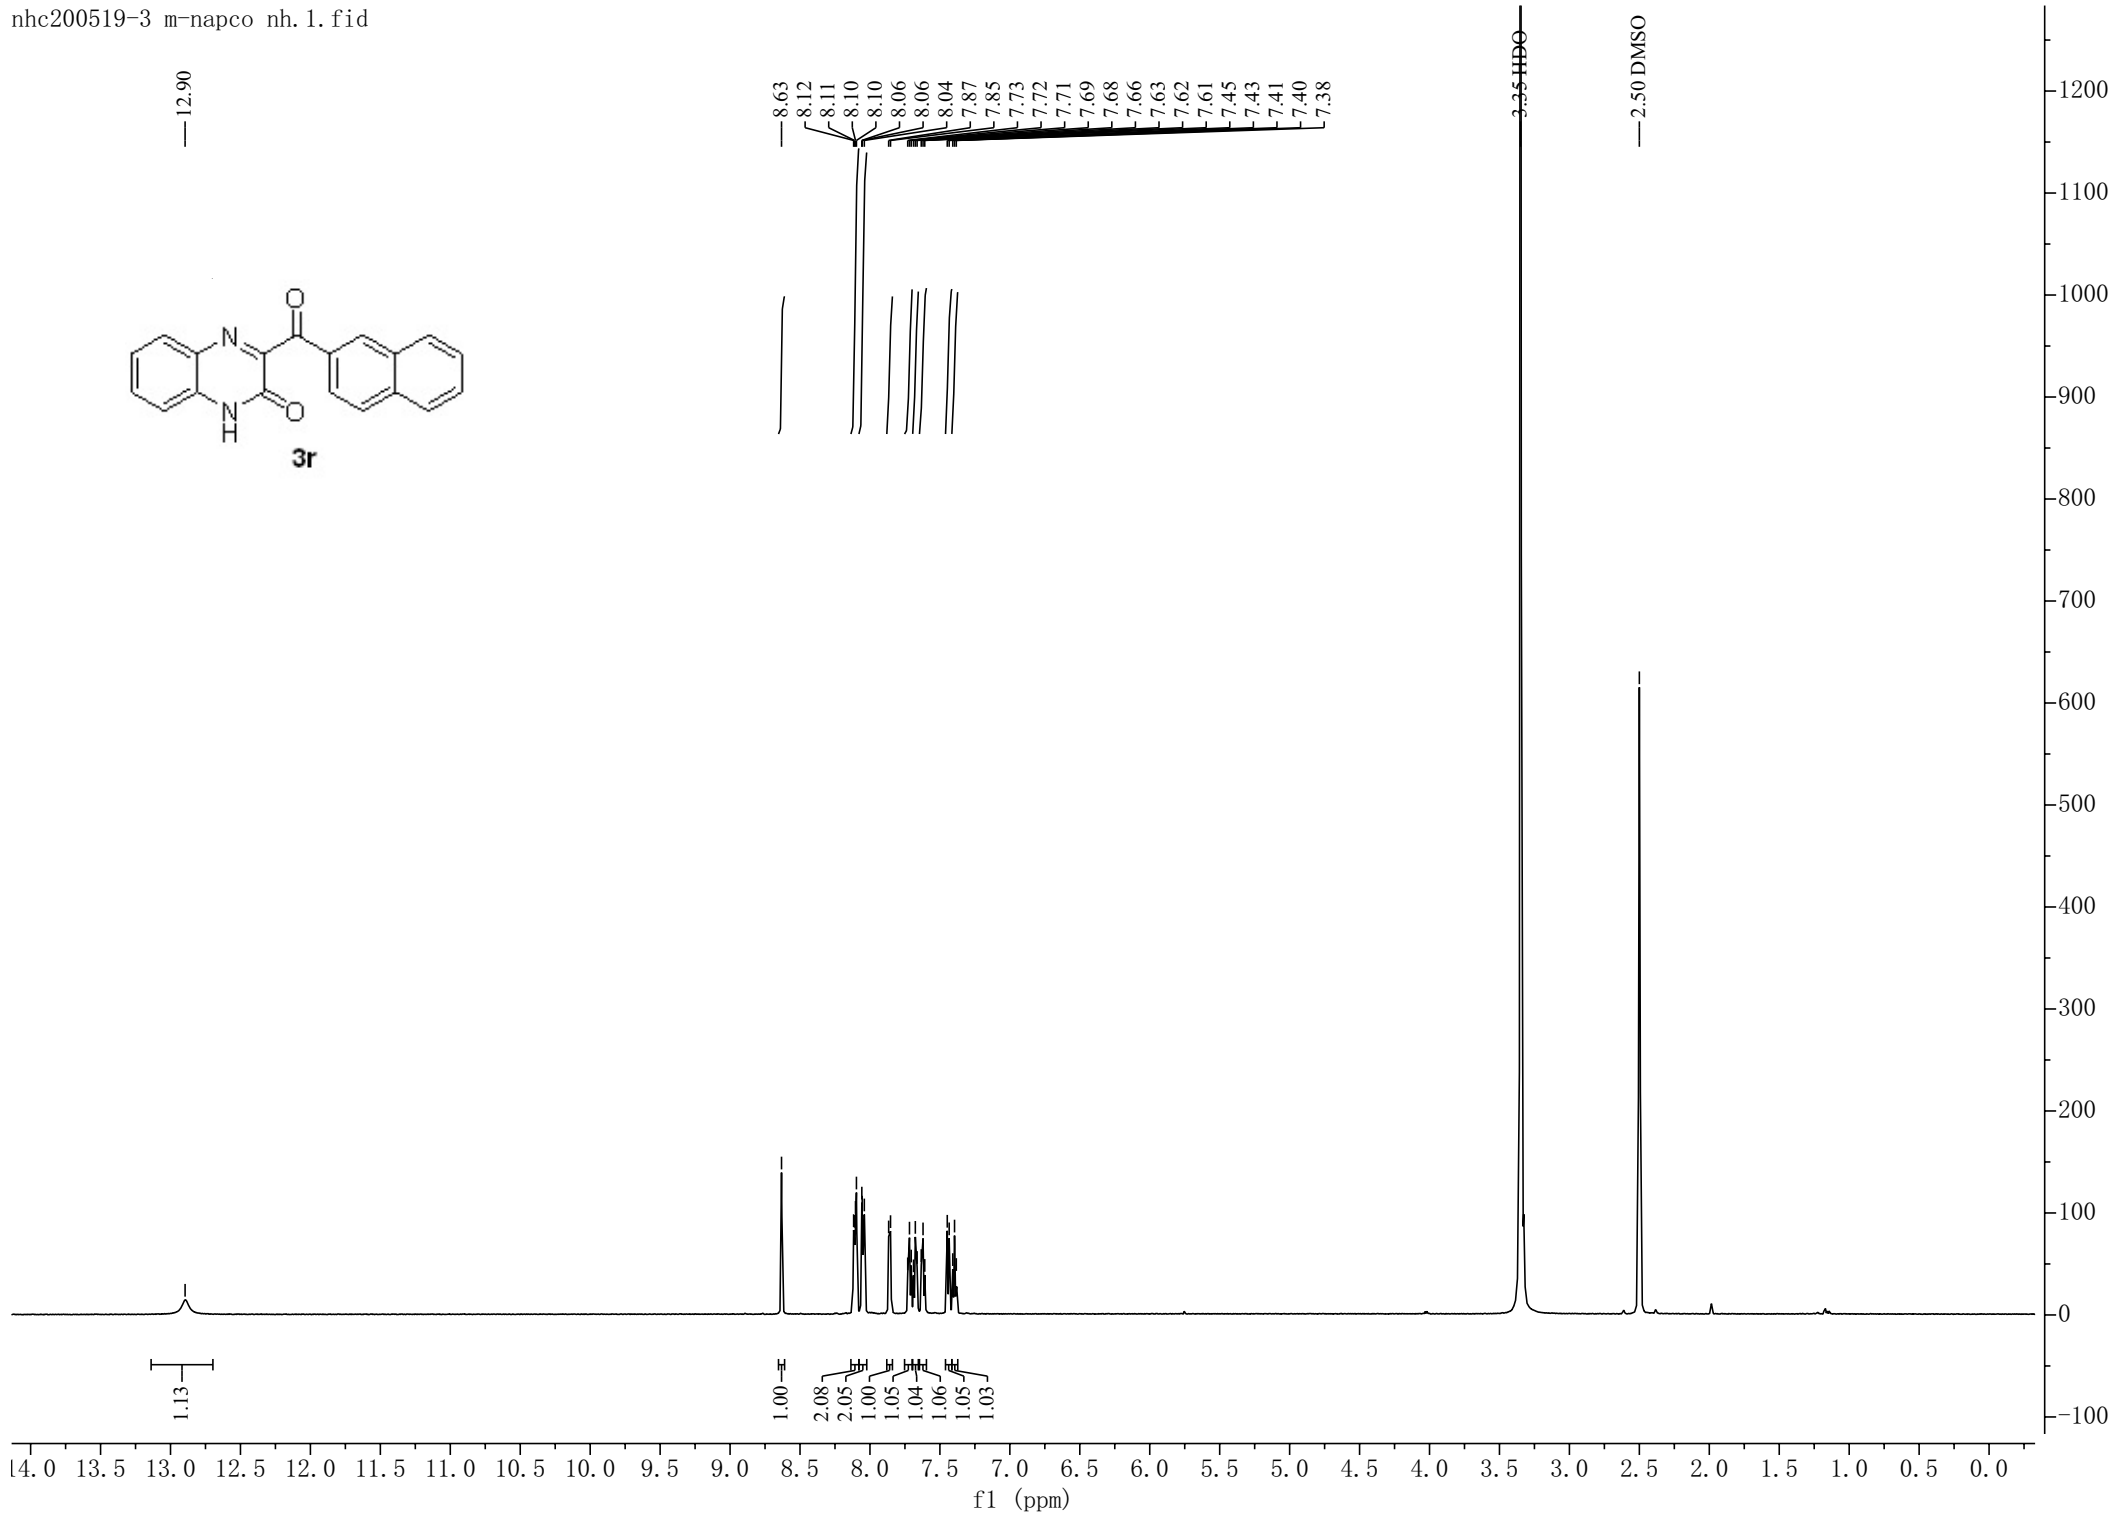

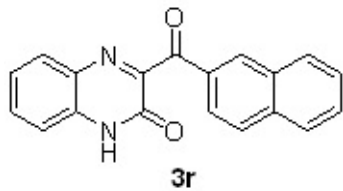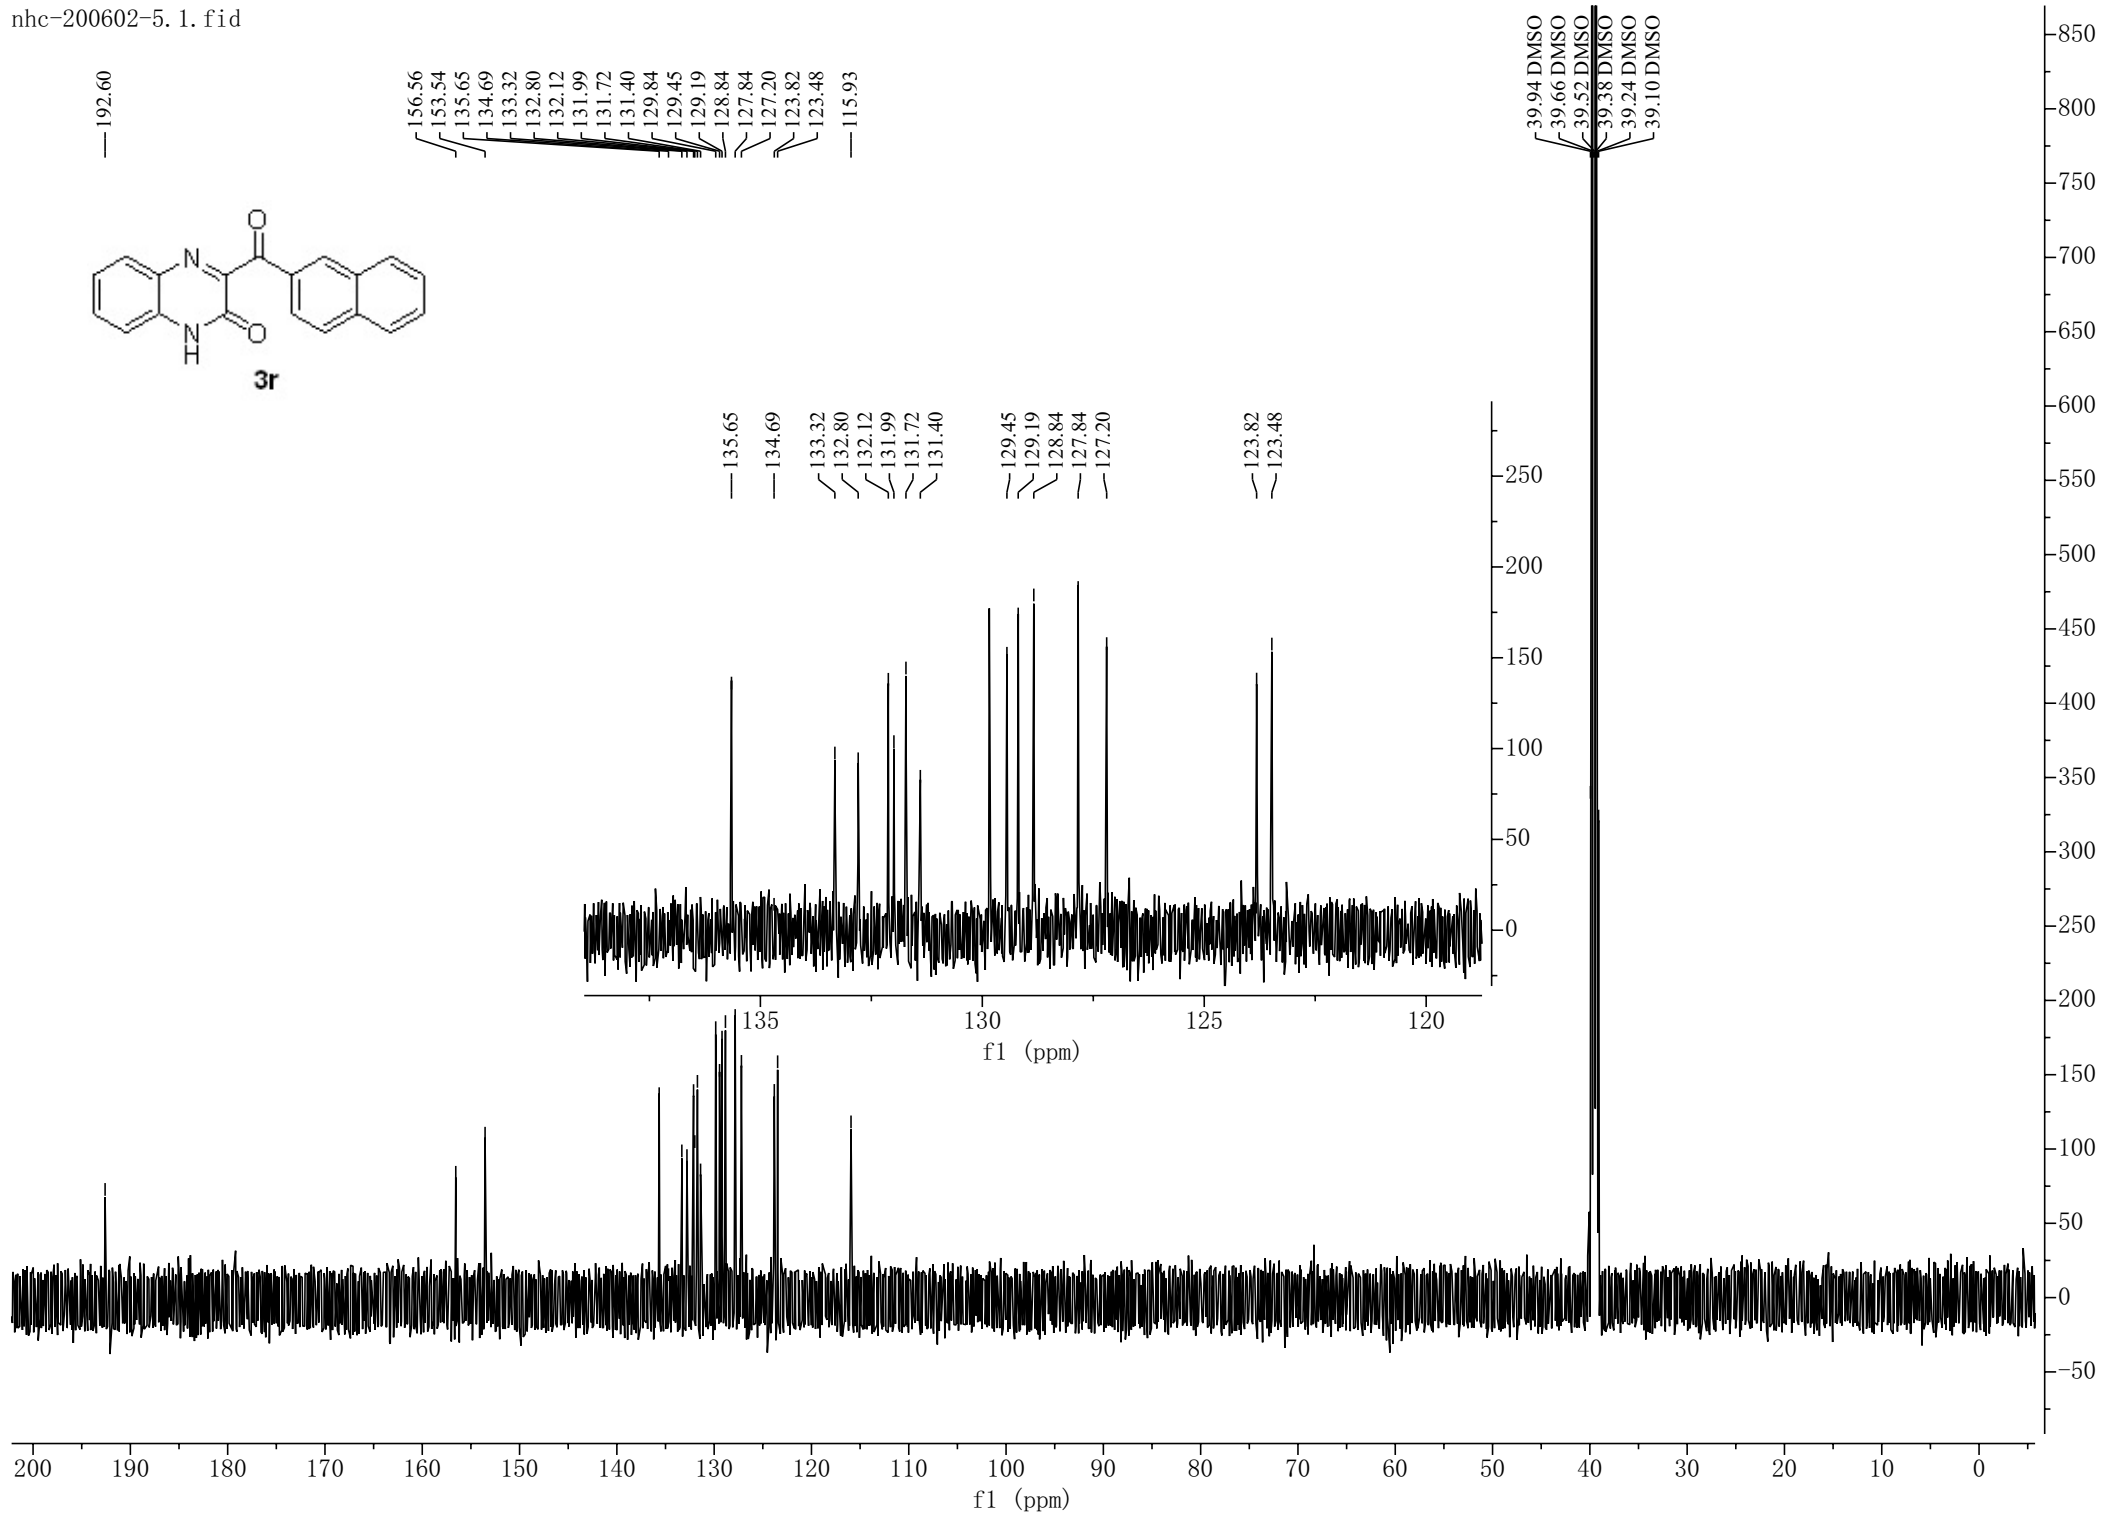

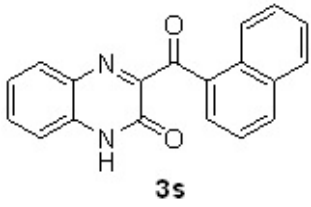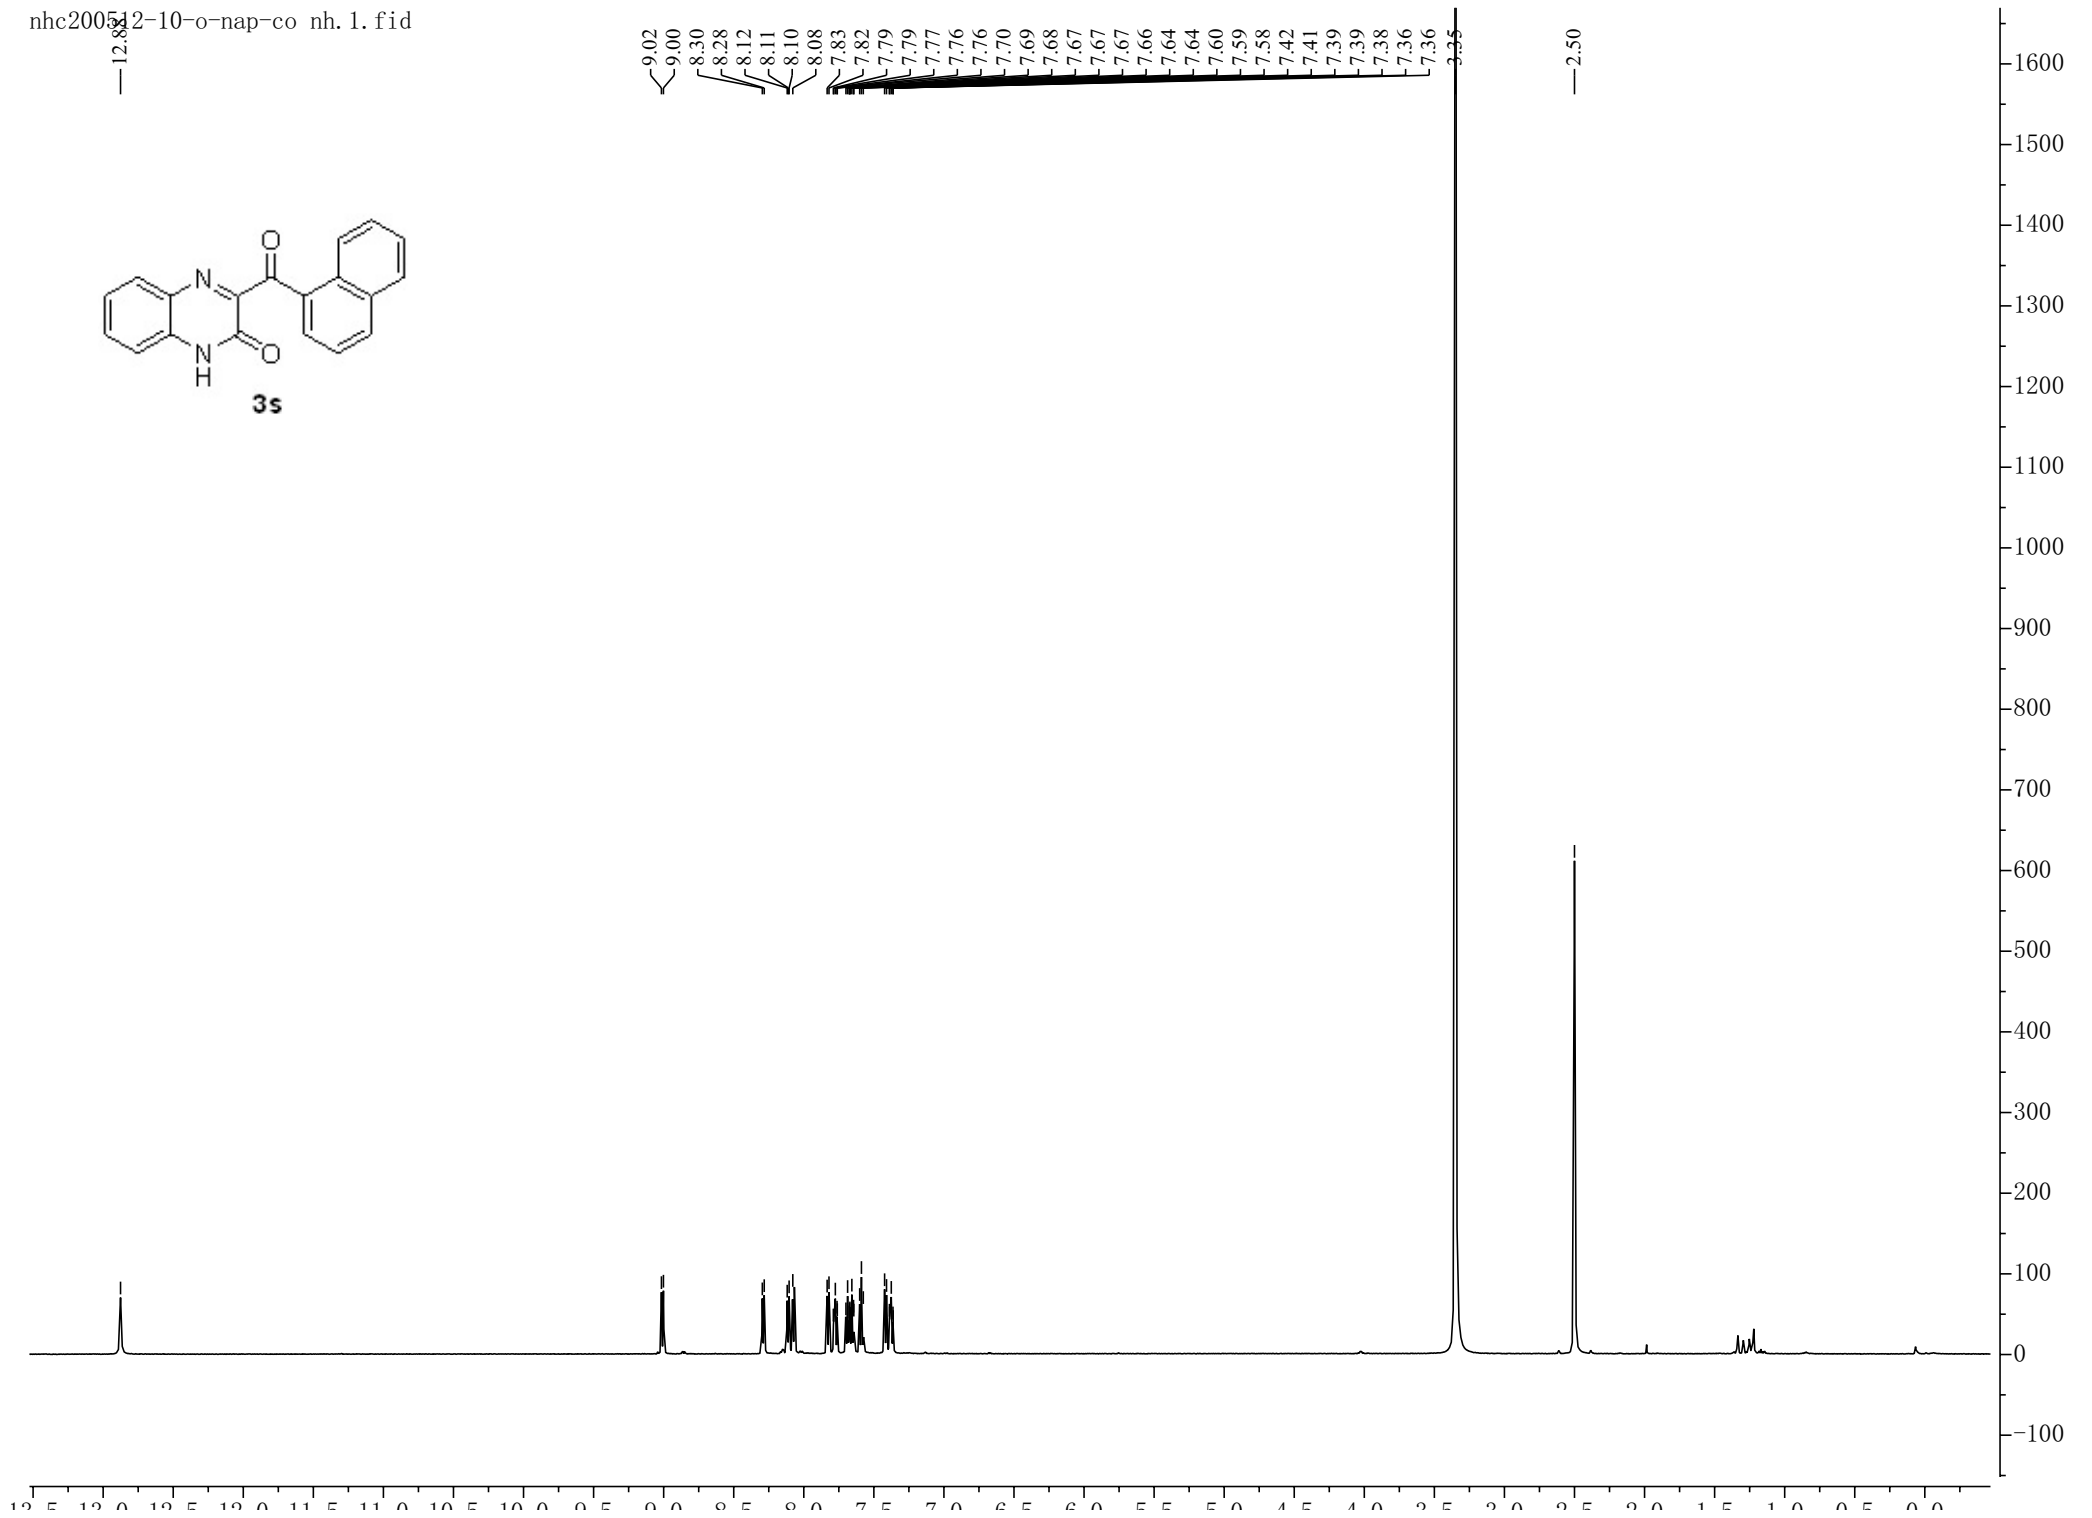

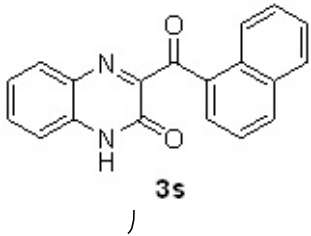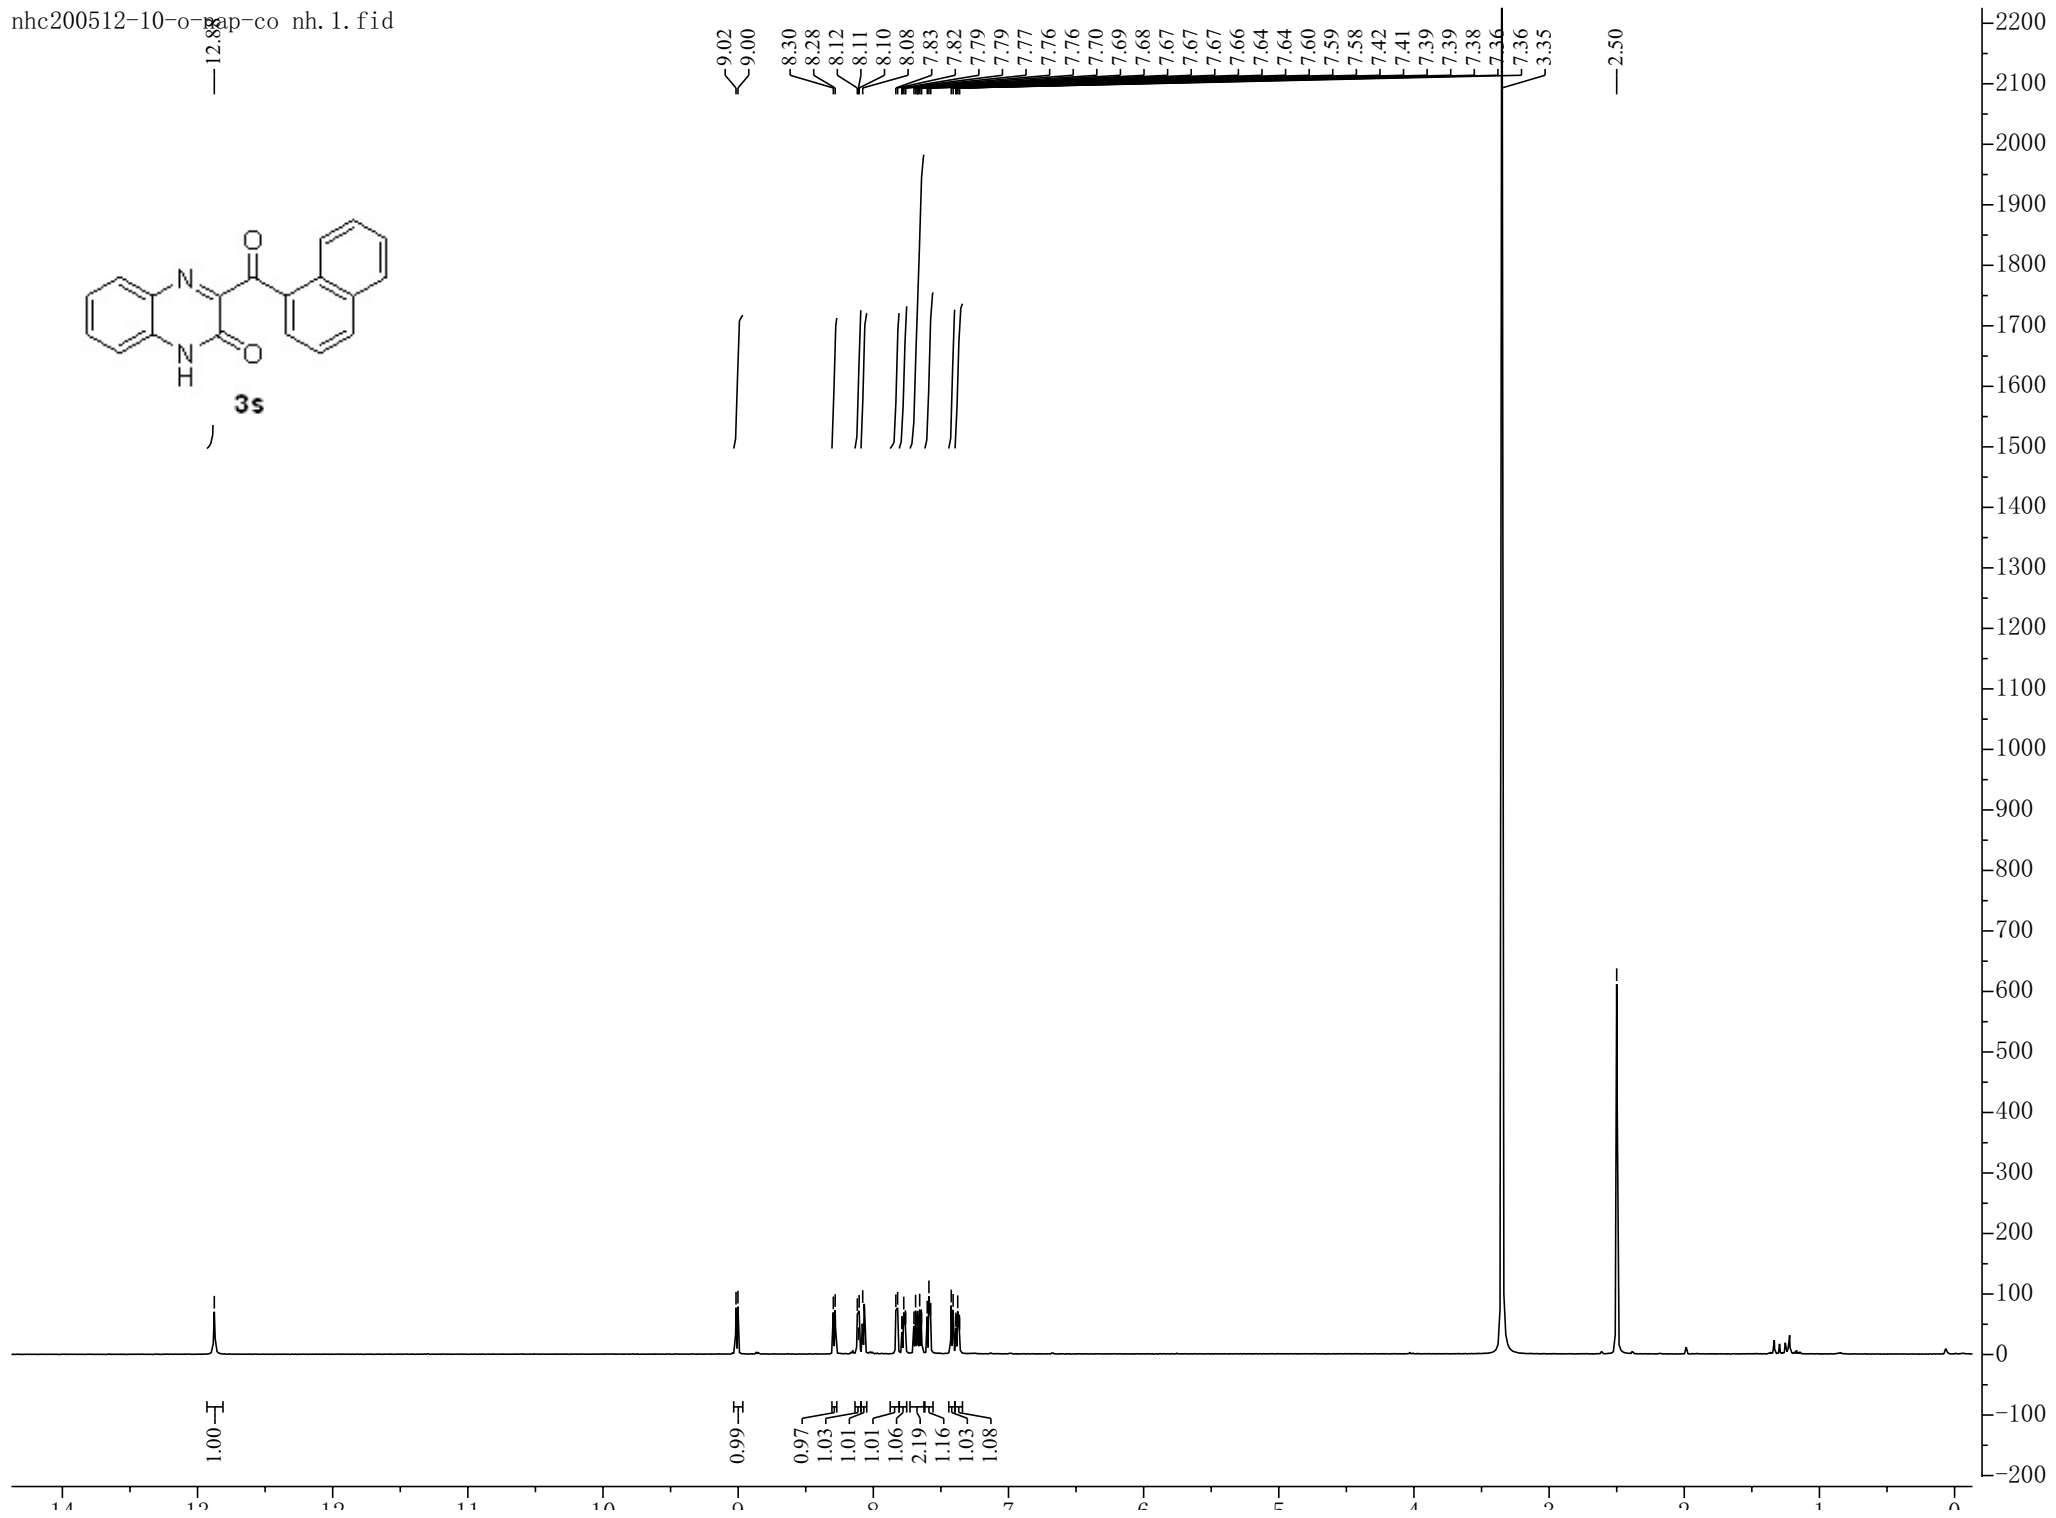

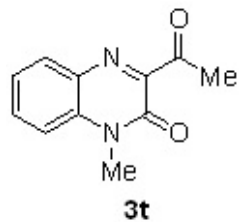

7.90  
7.90  
7.88  
7.88  
7.77  
7.77  
7.76  
7.76  
7.75  
7.74  
7.74  
7.64  
7.63  
7.46  
7.46  
7.45  
7.45  
7.44  
7.43

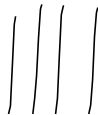

3.64  
3.34  
3.34  
2.58  
2.50  
2.50

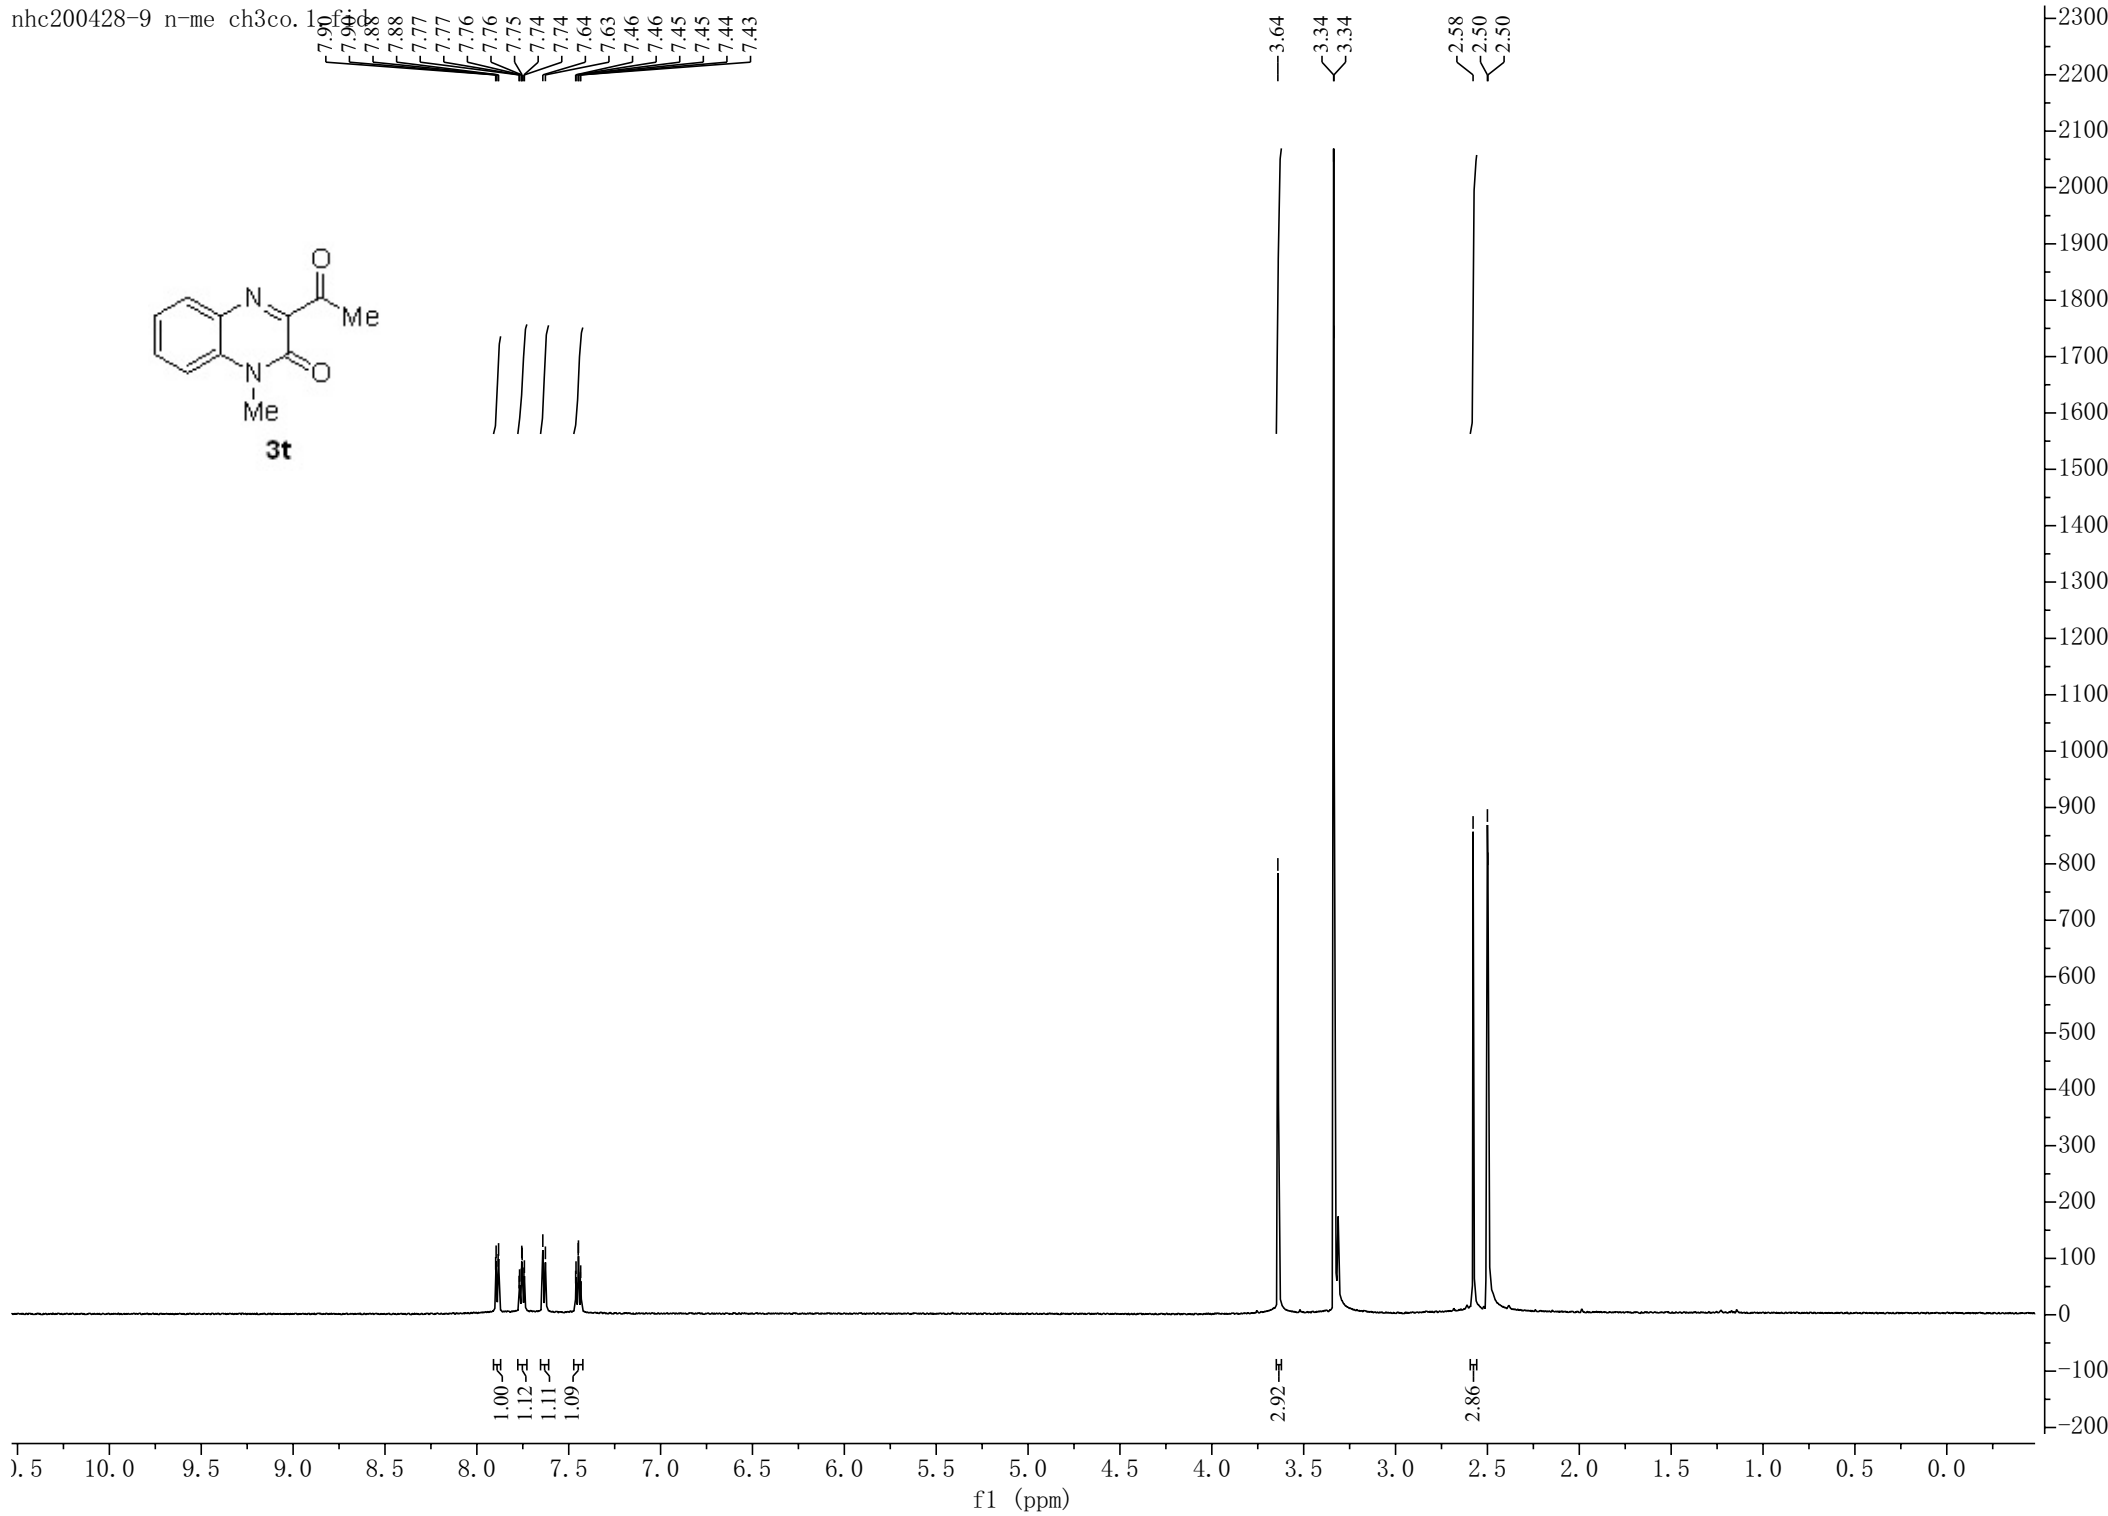

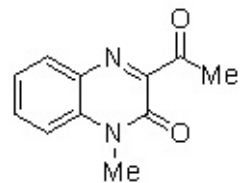

**3t**

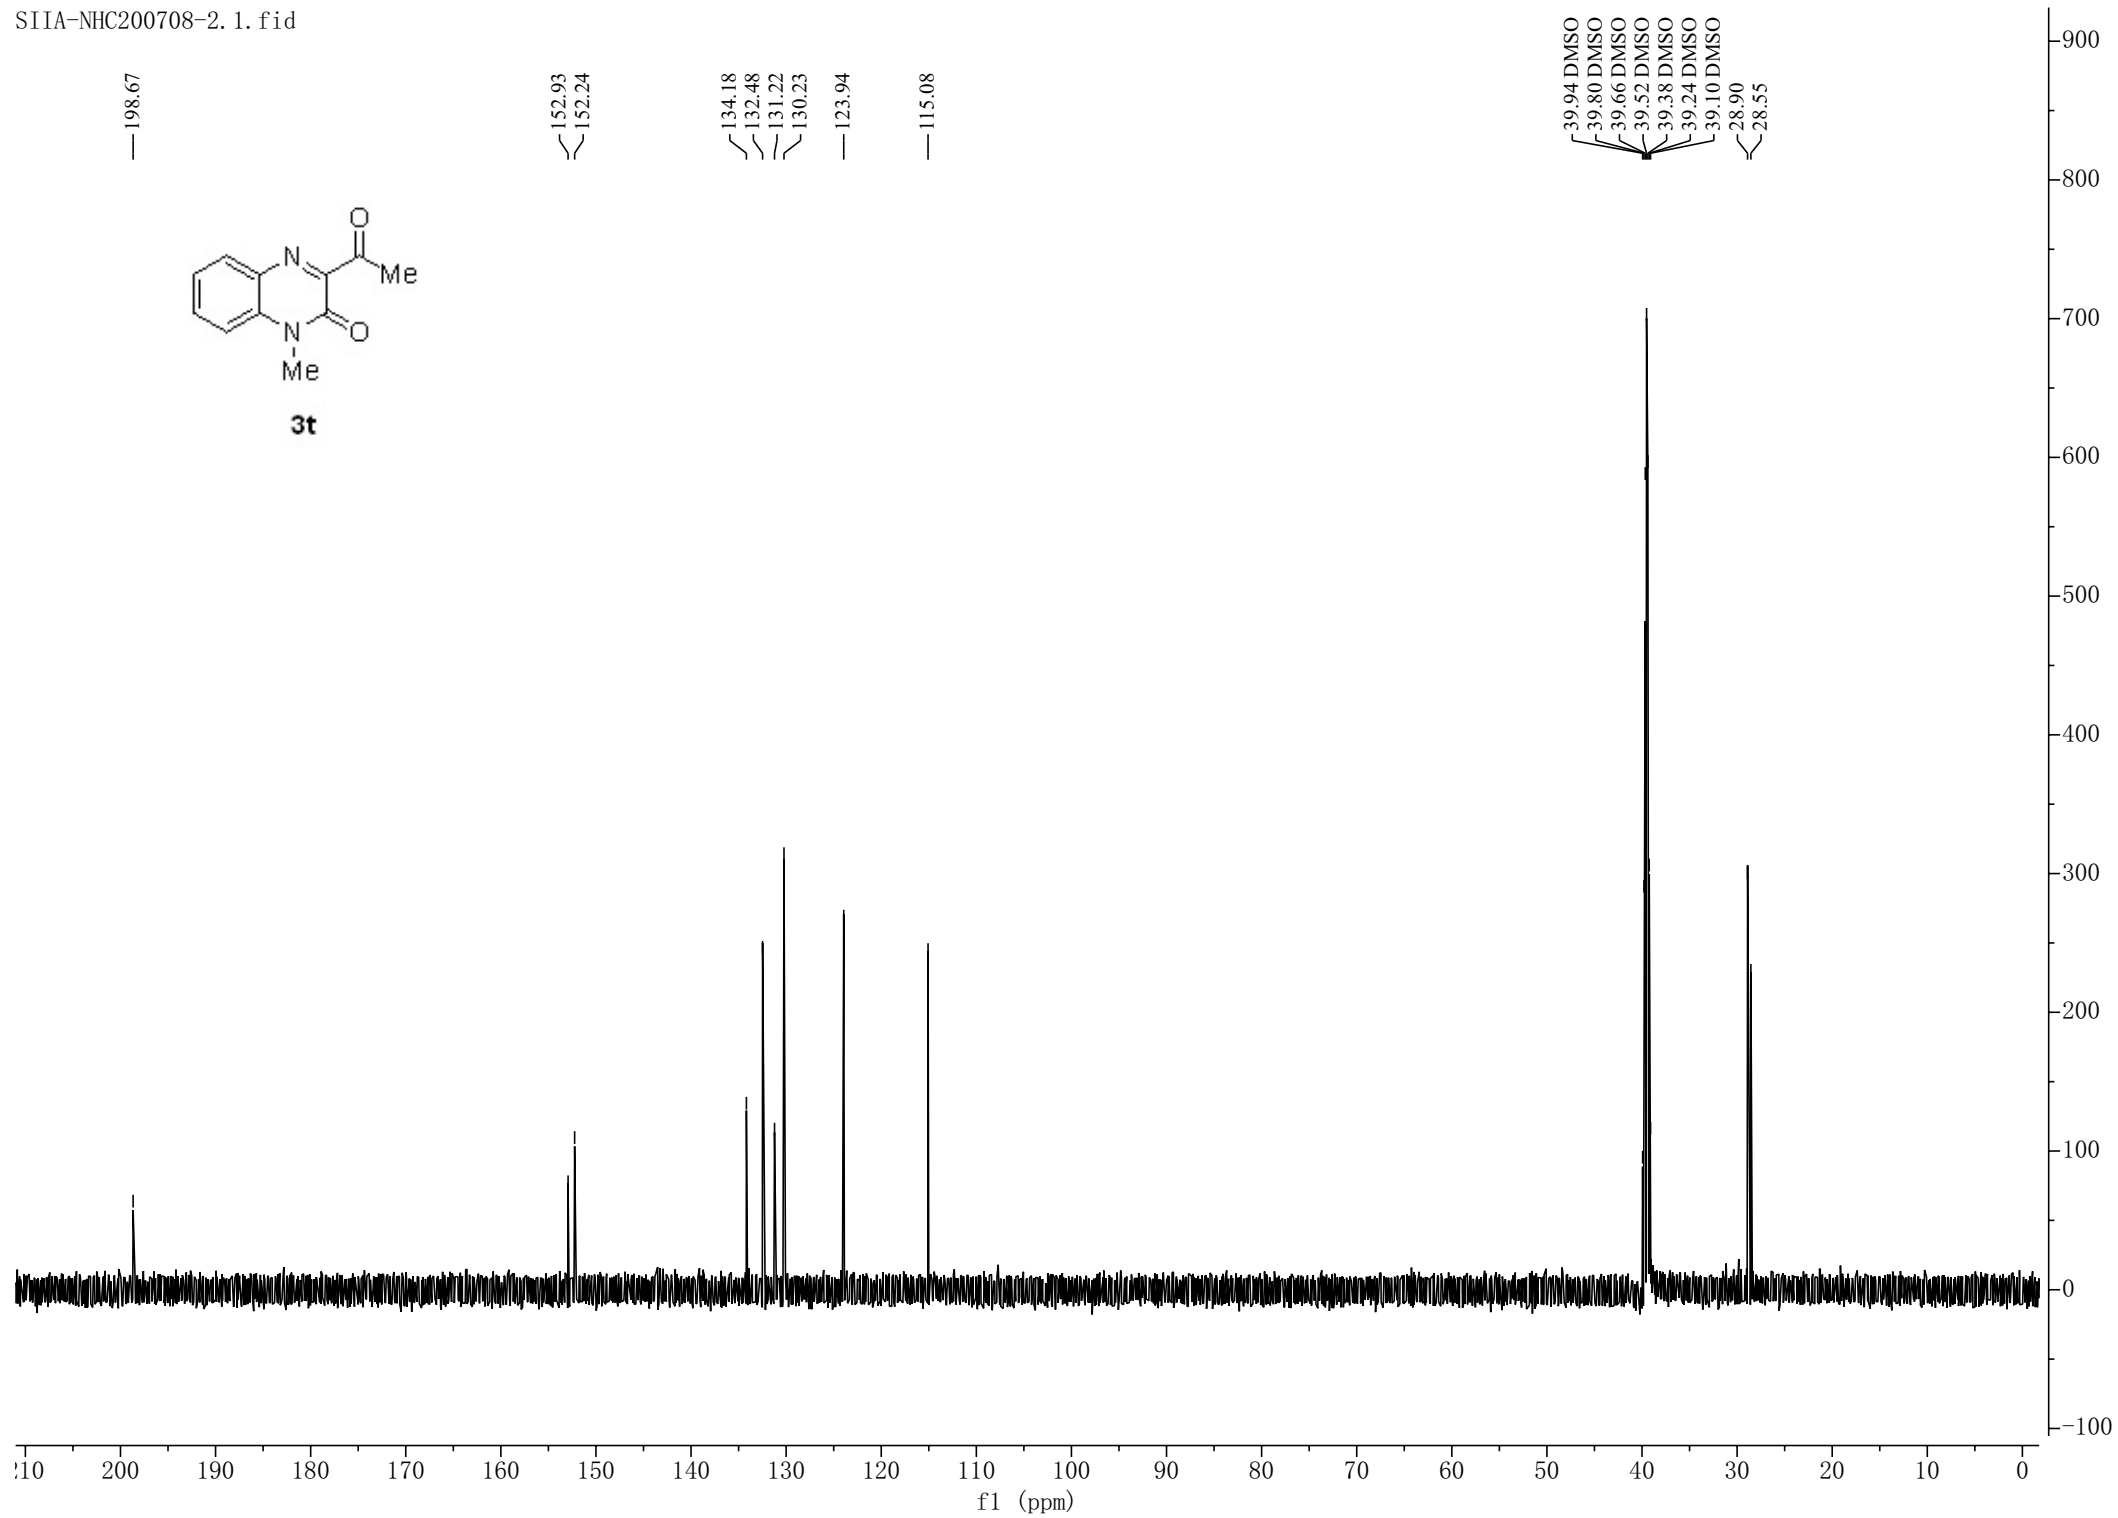

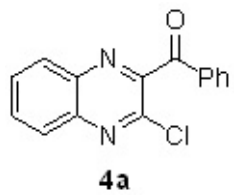

8.16  
8.15  
8.13  
8.12  
7.93  
7.92  
7.91  
7.89  
7.87  
7.86  
7.85  
7.69  
7.68  
7.67  
7.53  
7.52  
7.51  
7.26 CDCl3

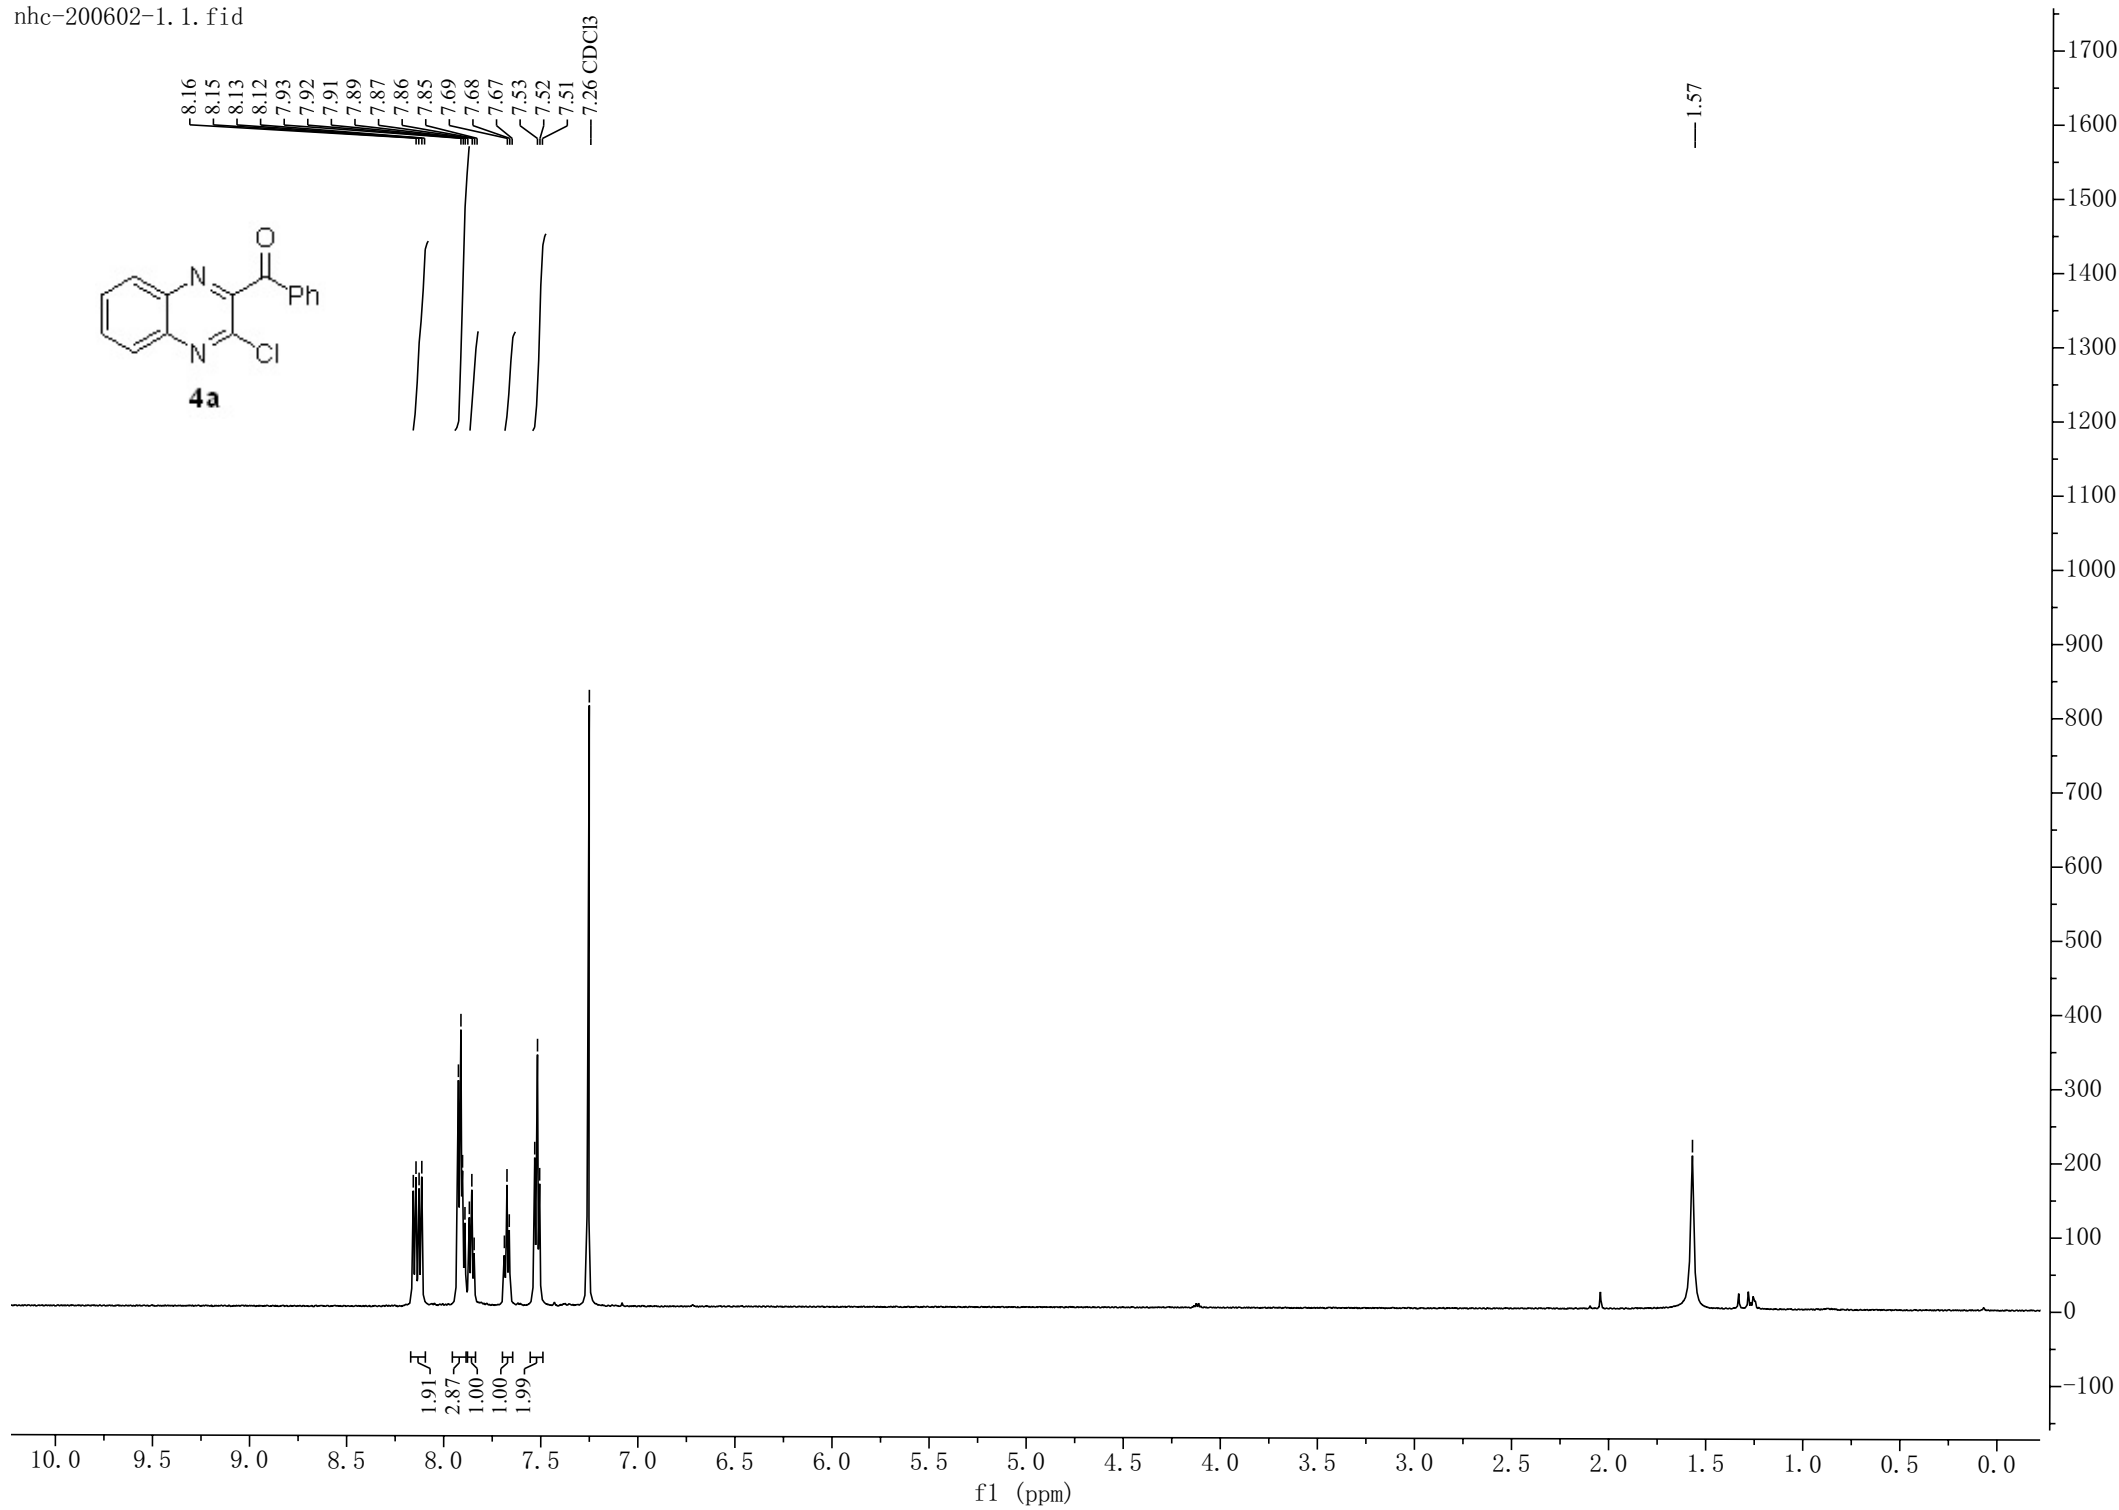

— 191.32

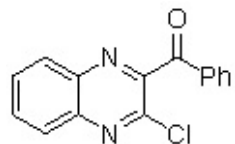**4a**— 149.89  
— 142.89  
— 141.67  
— 139.30  
— 135.16  
— 134.26  
— 132.81  
— 131.65  
— 130.38  
— 129.21  
— 129.16  
— 128.21— 40.06  
— 39.94 DMSO  
— 39.80 DMSO  
— 39.66 DMSO  
— 39.52 DMSO  
— 39.38 DMSO  
— 39.24 DMSO  
— 39.10 DMSO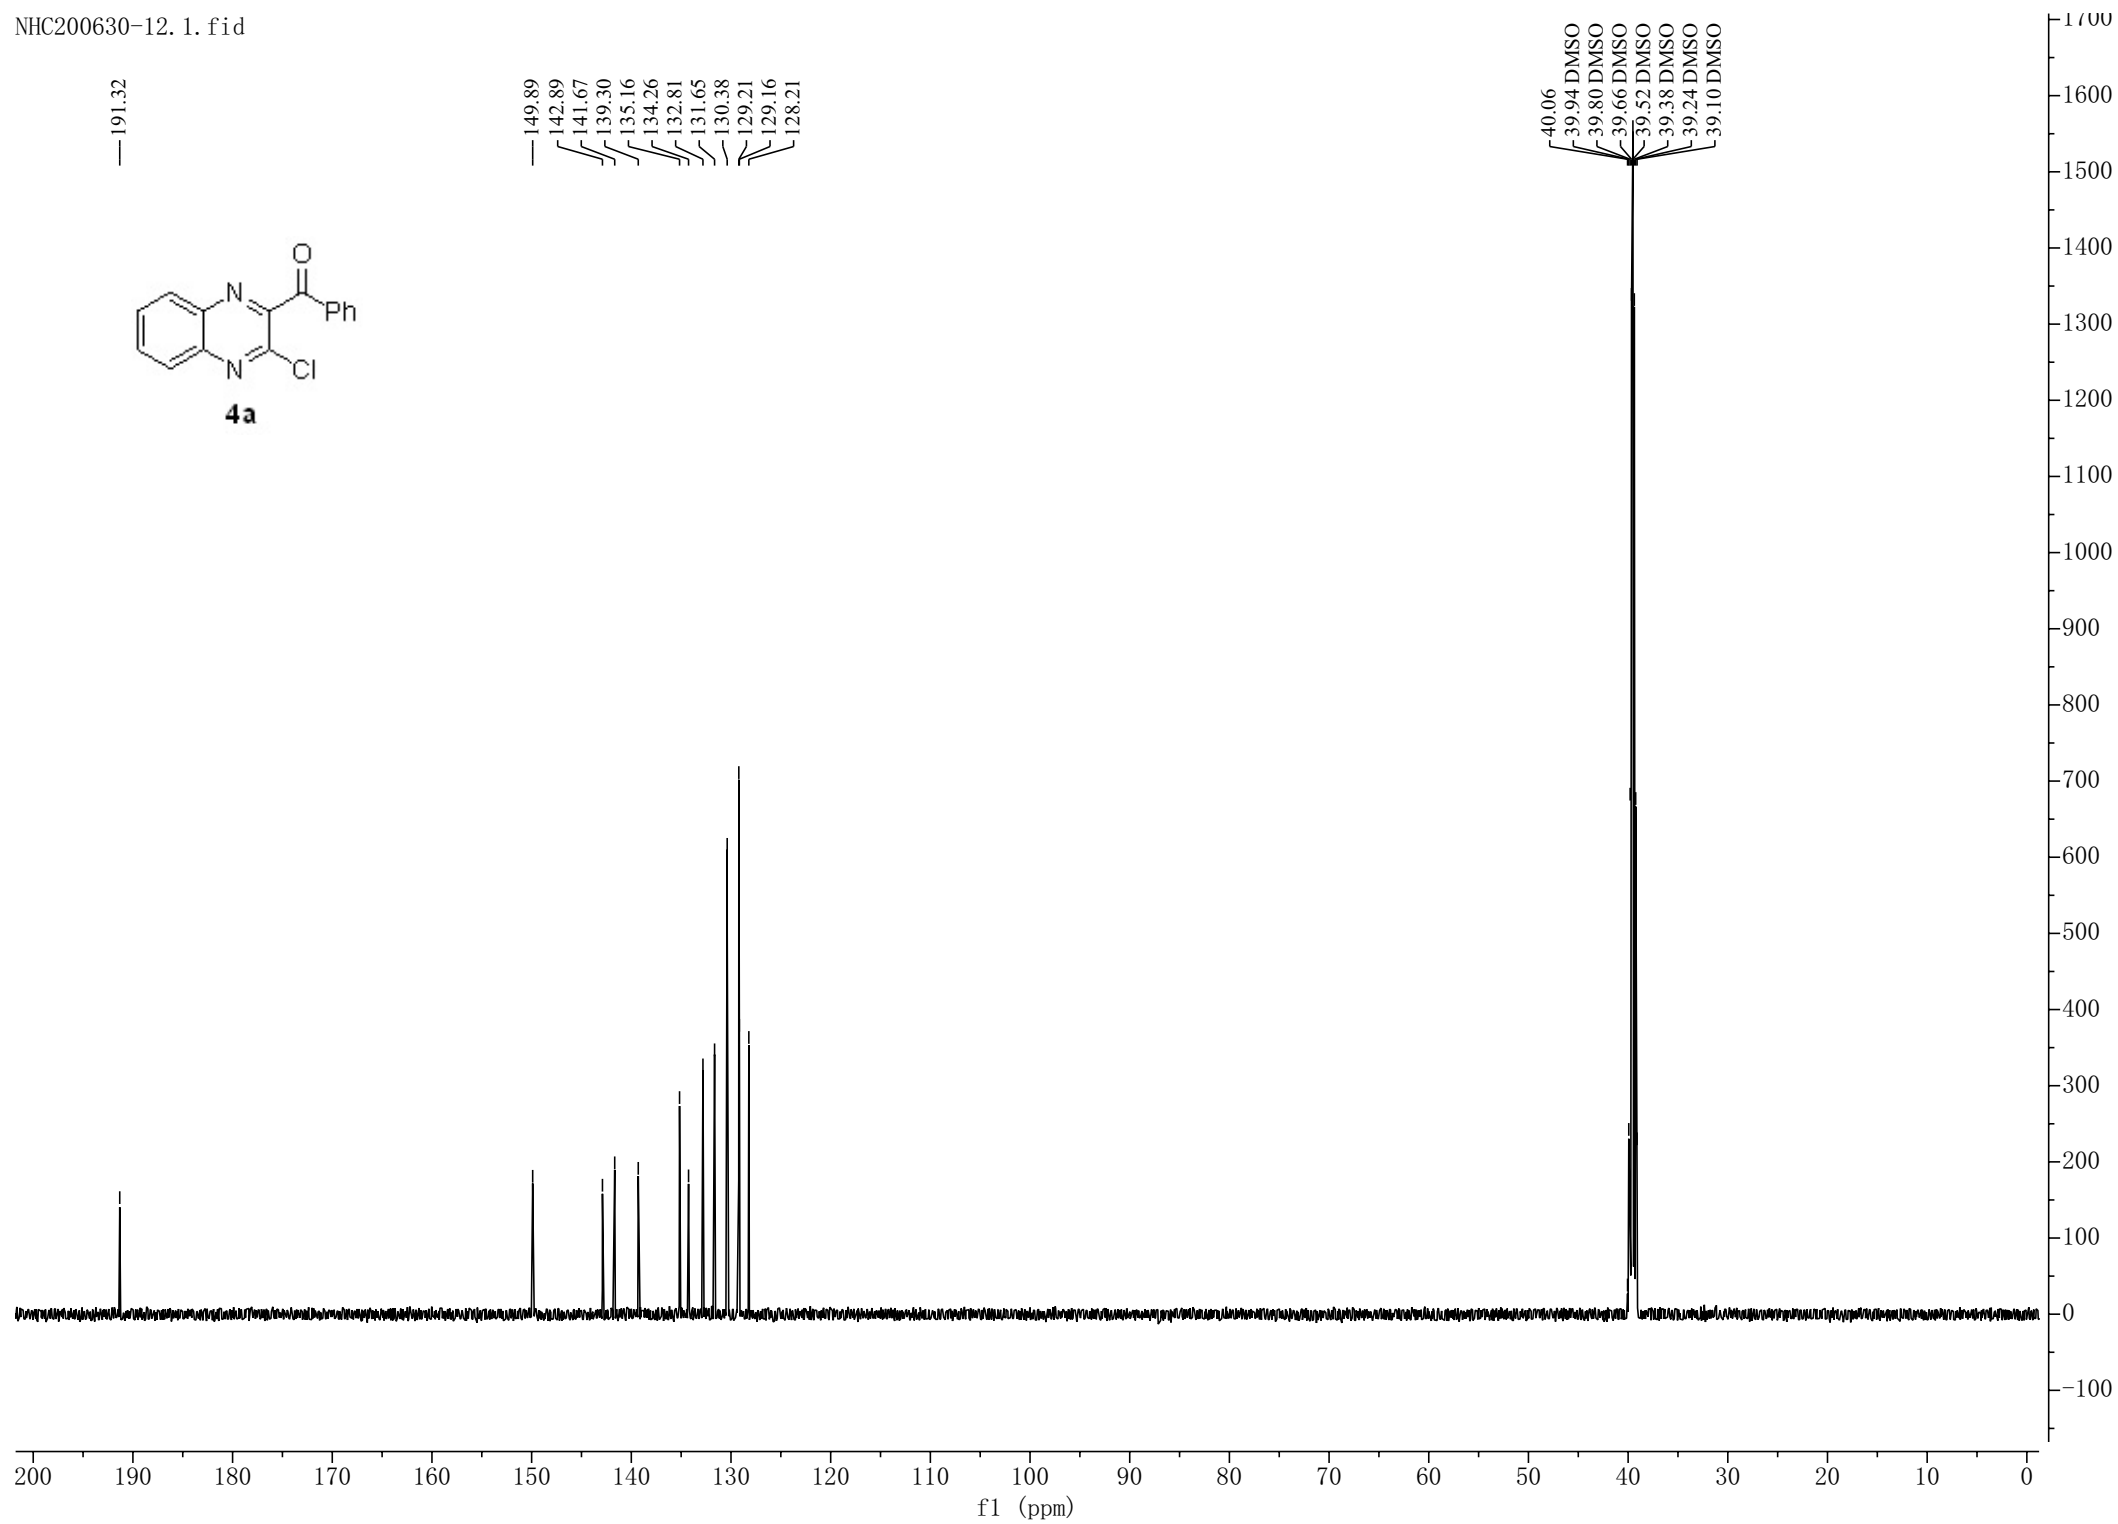



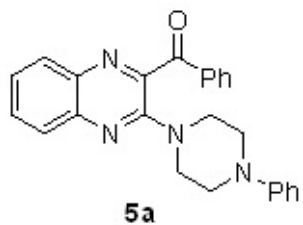

8.05  
8.01  
7.95  
7.94  
7.83  
7.82  
7.70  
7.69  
7.68  
7.66  
7.65  
7.54  
7.53  
7.51  
7.50  
7.48  
7.27  
7.26  
7.24  
6.90  
6.89  
6.87  
6.86

3.71  
3.70  
3.69  
3.19  
3.18  
3.18

2.05  
1.62

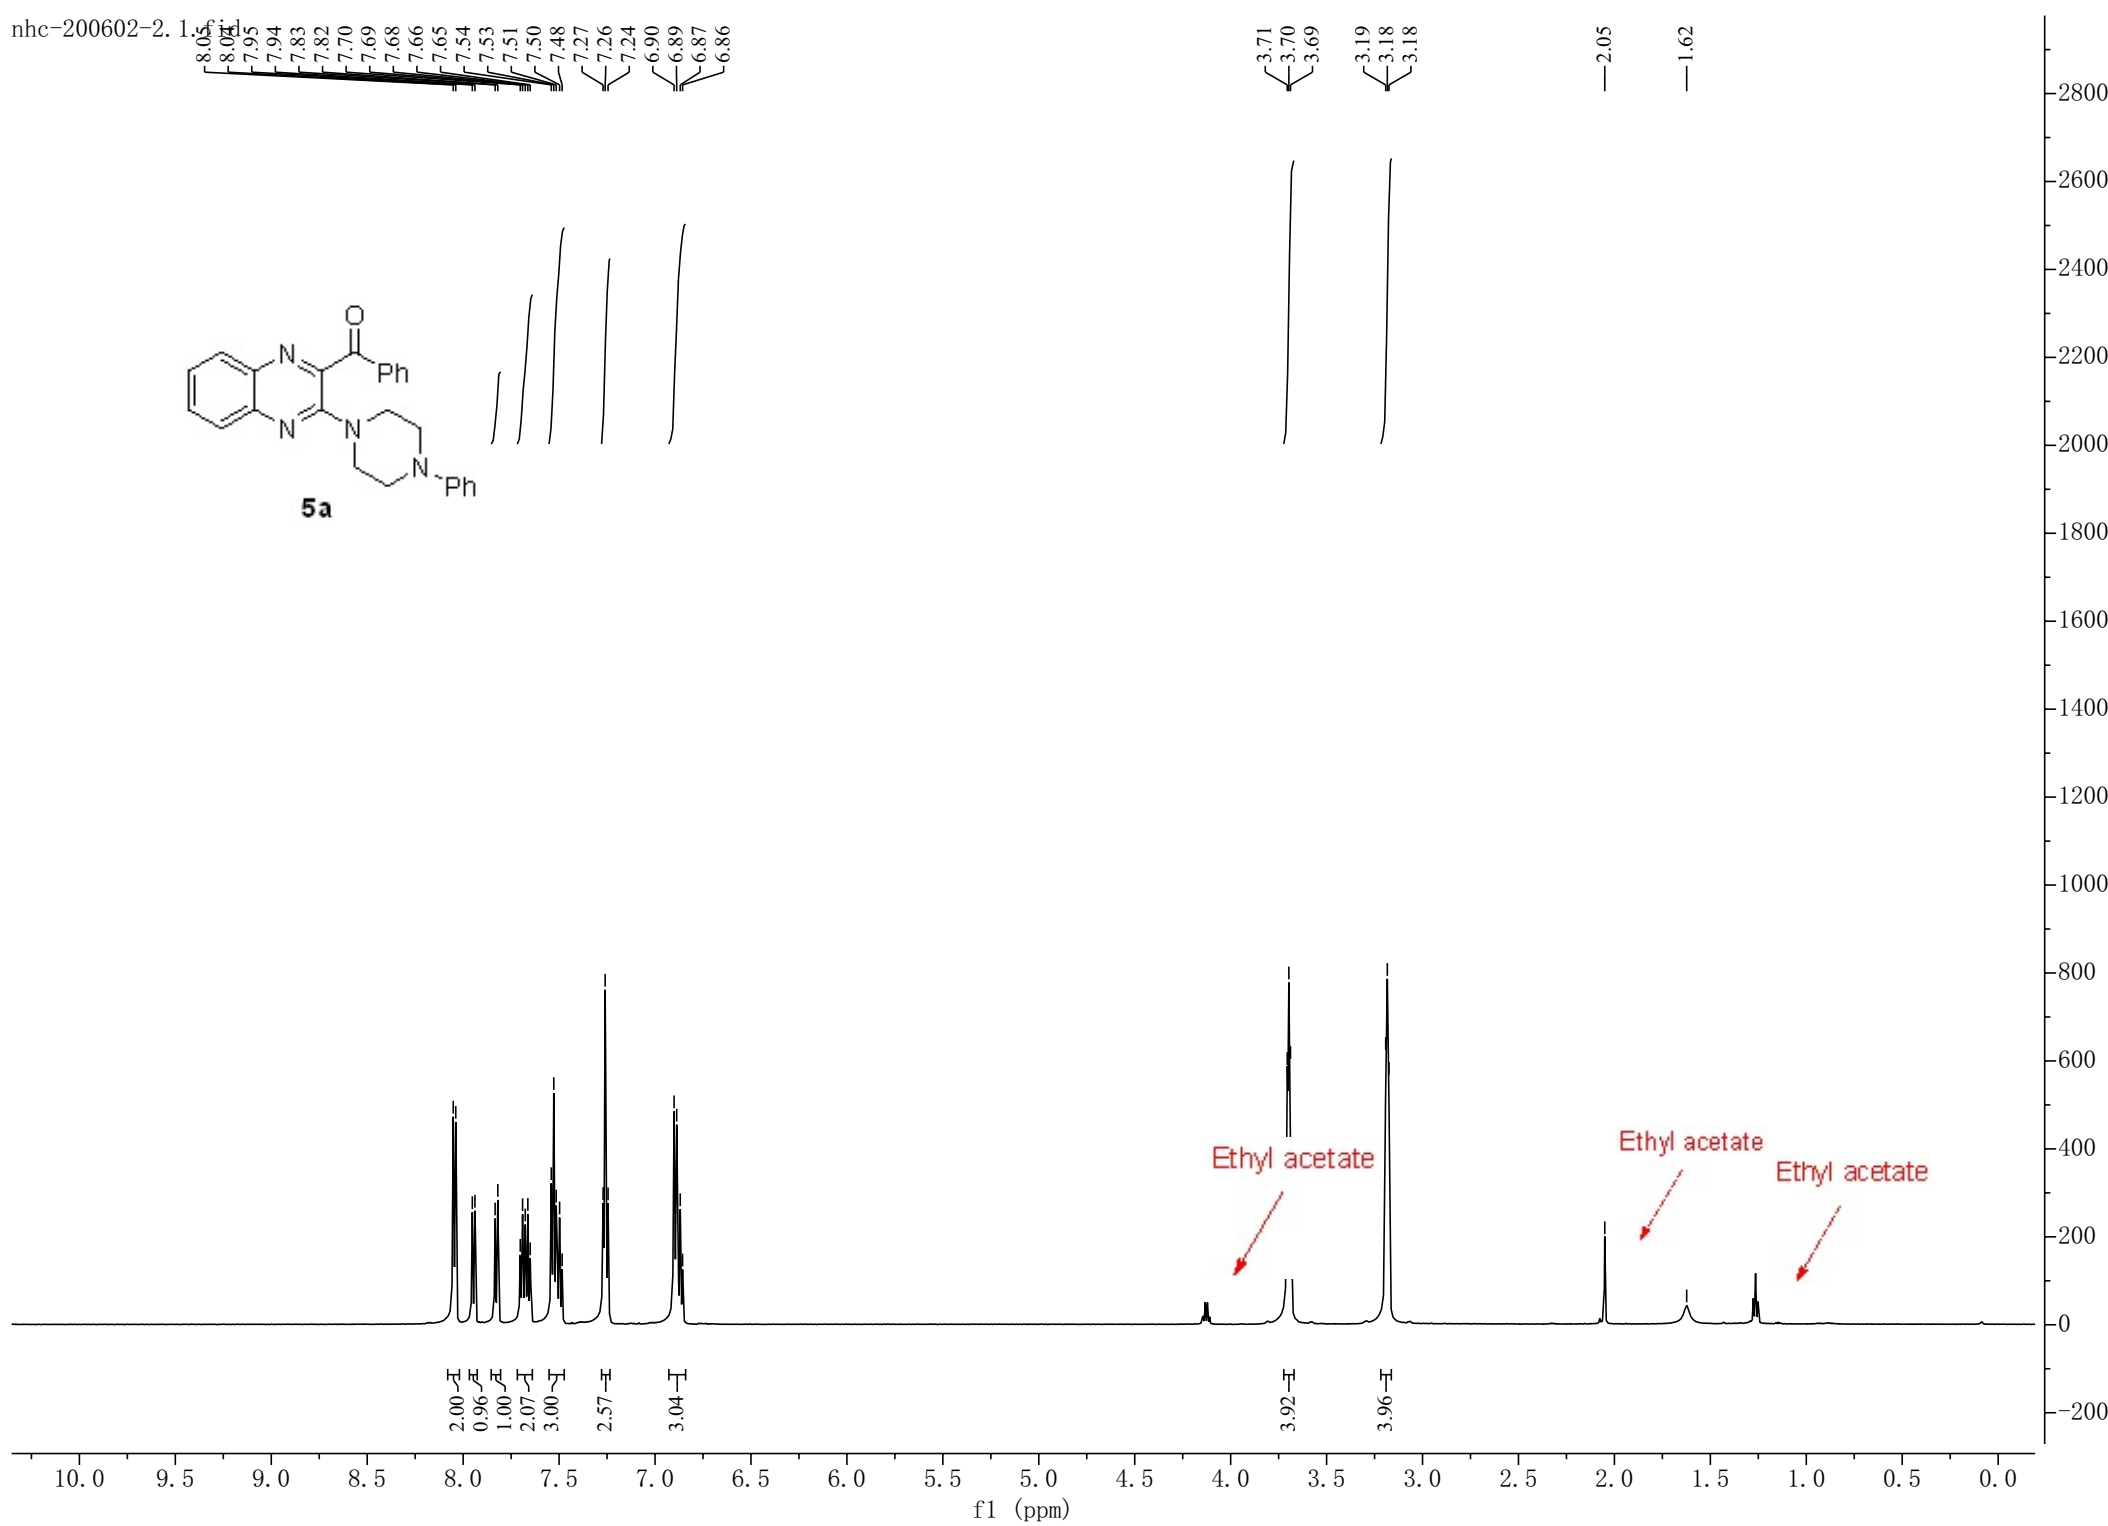

—192.76

151.40  
150.57  
144.14  
140.97  
135.28  
134.88  
134.48  
131.58  
130.47  
129.00  
128.95  
128.74  
126.31  
126.06  
119.06  
115.42

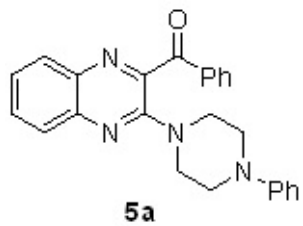

47.49  
47.29  
39.94 DMSO  
39.80 DMSO  
39.66 DMSO  
39.52 DMSO  
39.38 DMSO  
39.24 DMSO  
39.10 DMSO

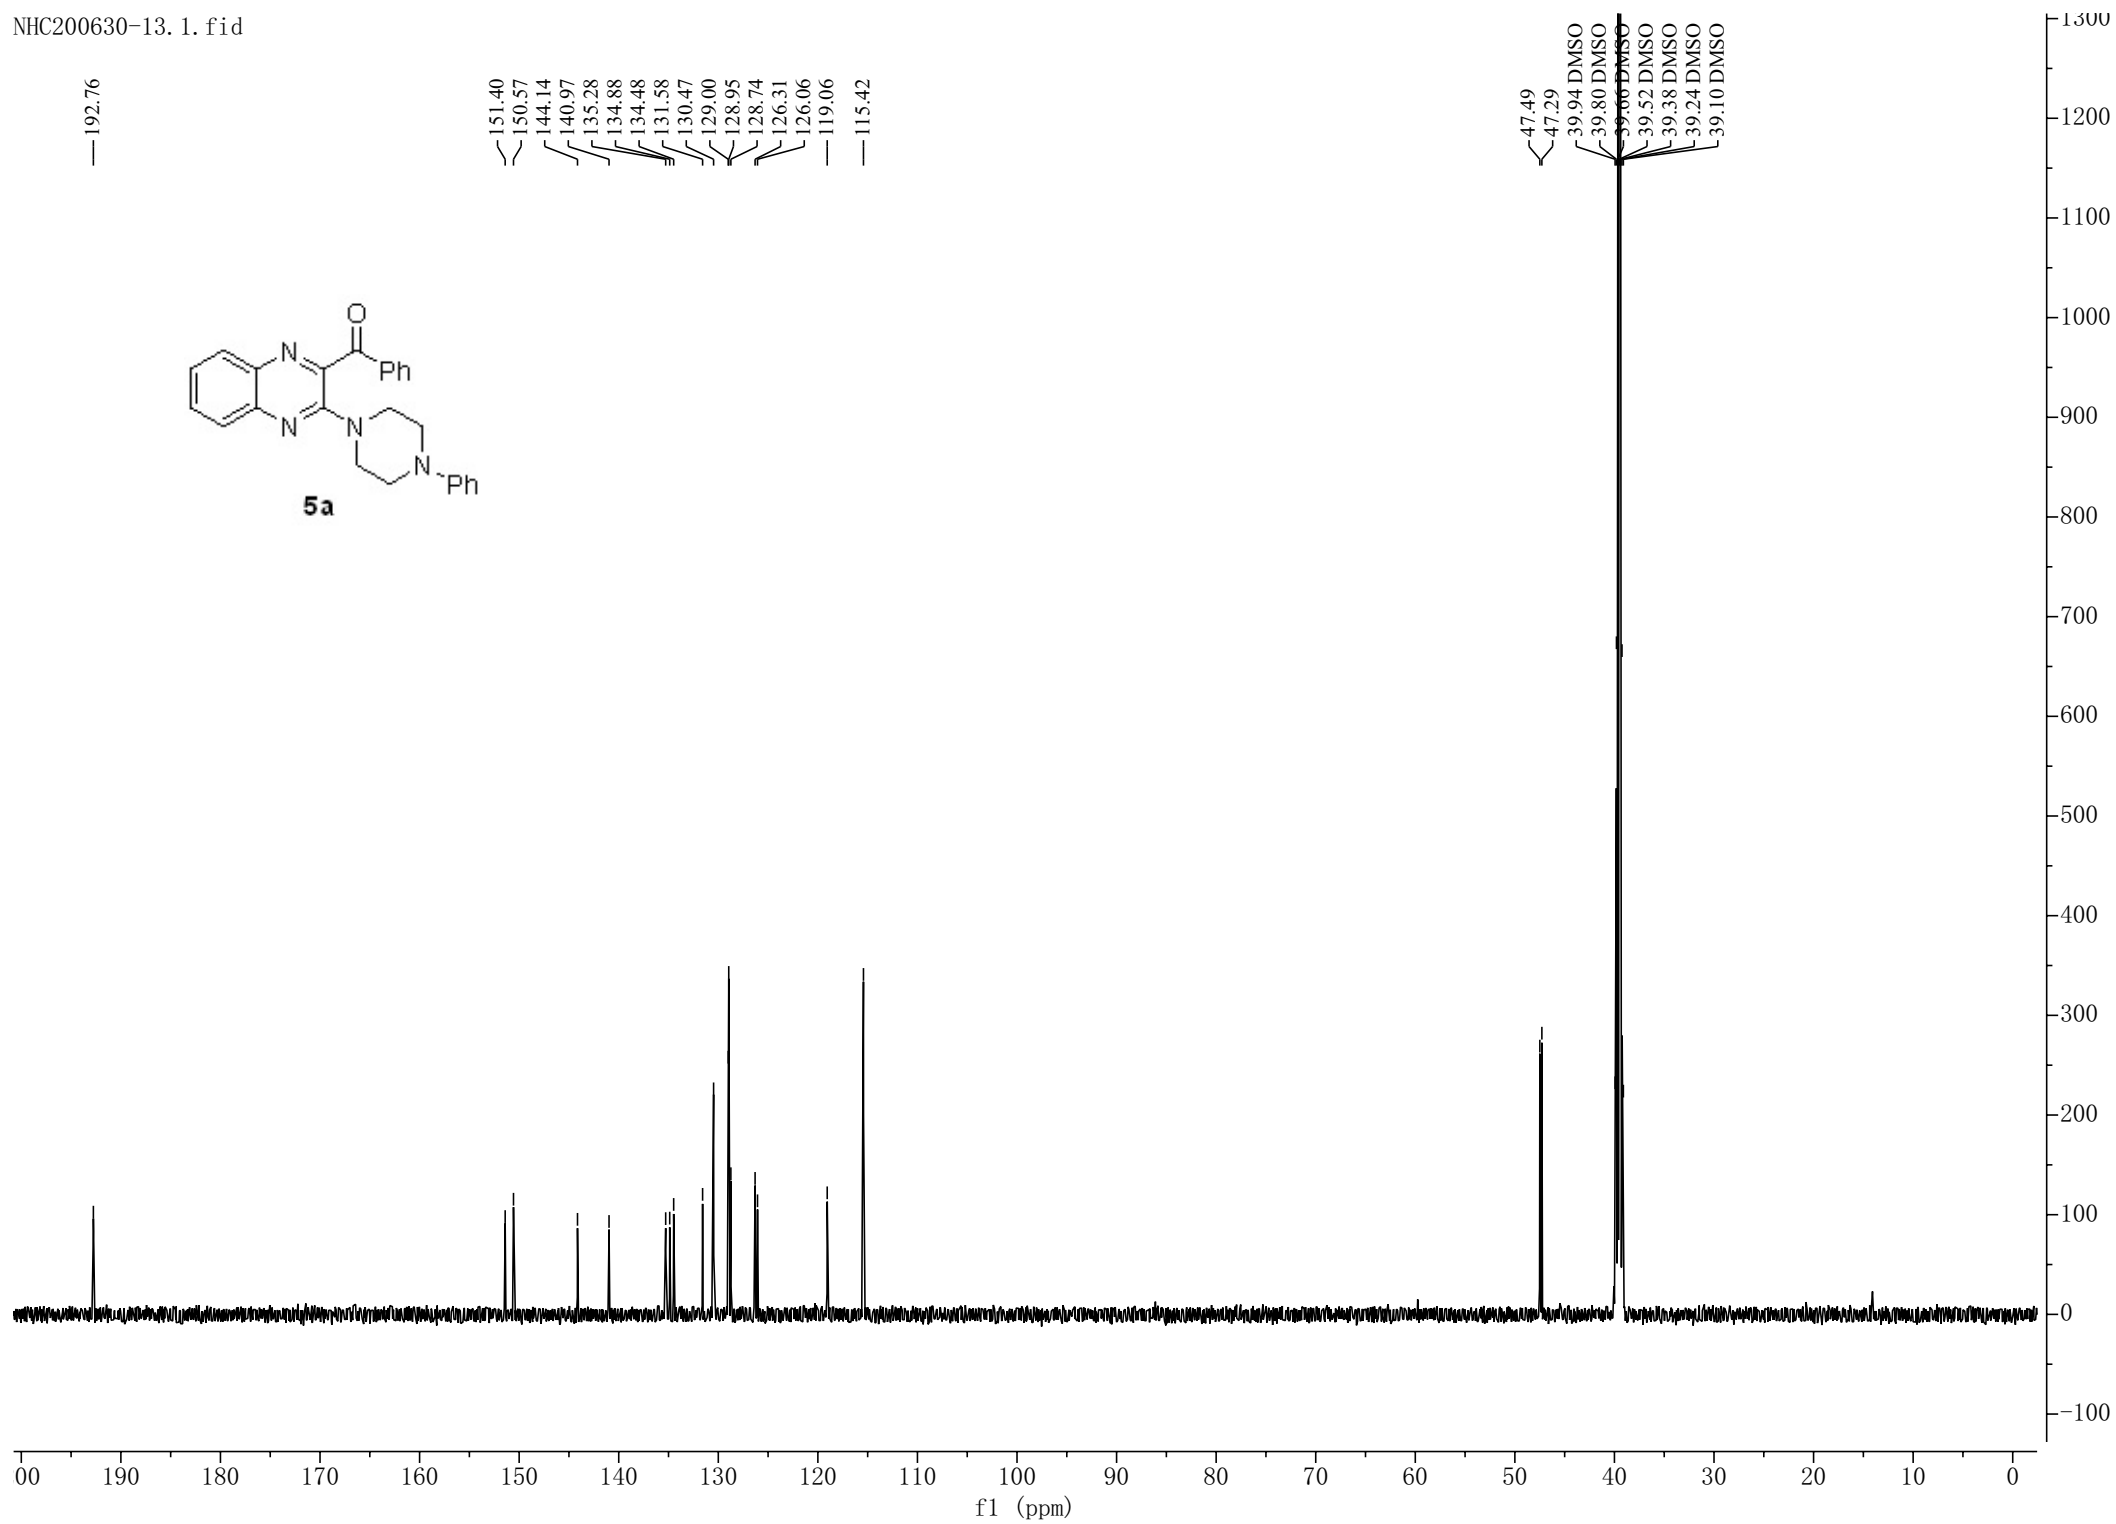

Supplement: d0ob01423k1.pdf [file d0ob01423k1.pdf]
